# Supplementary material for: Construction of alkynyl and acyl disulfides directly through thiol-modification withN-alkynylthio phthalimides under acid catalysis
Source: Royal Society of Chemistry journal article supplement (doi:10.1039/d3qo00159h), 2023-01-01

# **Construction of alkynyl and acyl disulfides directly through thiol-modification with N-alkynylthio phthalimides under acid catalysis**

Yao-Nan Xue, Kai Feng, Jun Tian, \* Juan Zhang,<sup>a</sup> Hong-Hong Chang, and Wen-Chao Gao\*

[gaowenchao@tyut.edu.cn](mailto:gaowenchao@tyut.edu.cn)

## **Table of Contents**

|                                                          |            |
|----------------------------------------------------------|------------|
| <b>1. General information.....</b>                       | <b>S2</b>  |
| <b>2. General procedure.....</b>                         | <b>S2</b>  |
| <b>3. Condition optimization.....</b>                    | <b>S4</b>  |
| <b>4. Characterization of products.....</b>              | <b>S5</b>  |
| <b>5. Possible mechanism for S-S bond formation.....</b> | <b>S27</b> |
| <b>6. Copies of NMR spectra.....</b>                     | <b>S27</b> |

## 1. General information

### NMR

$^1\text{H}$  and  $^{13}\text{C}$  spectra were collected on 300 M, 400 M or 500 M Hz NMR spectrometers (Bruker AVANCE). Chemical shifts for protons are reported in parts per million (ppm) downfield and are referenced to residual protium in the NMR solvent. ( $\text{CHCl}_3 = 7.26$  ppm, DMSO = 2.50 ppm). Chemical for carbon are reported in parts per million downfield and are referenced to the carbon resonances of solvent ( $\text{CHCl}_3 = 77.0$  ppm, DMSO = 39.52 ppm). Data are represented as follows: chemical shift, multiplicity (br = broad, s = singlet, d = double, t = triplet, q = quartet, m = multiplet), coupling constants in Hertz (Hz), integration.

### MS

High-resolution mass spectra (HRMS) were performed on a microTOF-Q II instrument with an ESI or EI source.

### Chromatography

All solvents were obtained from commercial sources and were purified according to standard procedures. Petroleum ether (PE), where used, has the boiling point range 60-90 °C. Column chromatography was performed with silica gel (200-300 mesh).

### Analytical and preparative HPLC information

Analytical and preparative HPLC measurements were performed on Shimadzu Essentia LC-16 with DGU-20A detector using C18 column (250 x 4.6 mm, 5  $\mu\text{m}$ ). Water (solvent A) and acetonitrile containing 0.1%TFA (solvent B) were used as the mobile phase, at a flow rate of 0.7 mL/min.

Analytic method: 10% B to 90%B (0-20 min), 90%B (20-30 min), 90%B-10%B (30-35 min), 10%B (35-40 min);

Preparation method: 10% B to 90%B (0-10 min), 90%B (10-15 min), 90%B-10%B (15-20 min), 10%B (20-25 min).

## 2. General procedure

### 2.1 General procedure for the synthesis of alkynyl disulfides

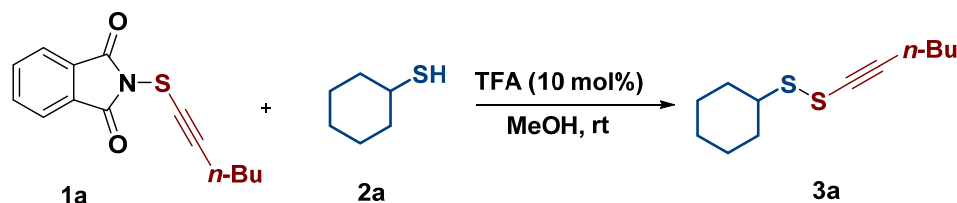

In a 10 mL flask, *N*-*n*-butylethynylthio phthalimide **1a** (0.18 mmol, 1.2 equiv.) and cyclohexanethiol **2a** (0.15 mmol, 1.0 equiv.), trifluoroacetic acid (2  $\mu$ L, 10 mol%) were dissolved in 1 mL of dry MeOH. The reaction mixture was stirred at room temperature for 10 min after cyclohexanethiol was completely consumed. The solvent was removed in vacuum and the crude product was purified by flash column chromatography to give the product **3a** as colorless oil (84% yield).

### 2.1 General procedure for disulfuration and oxyarylation

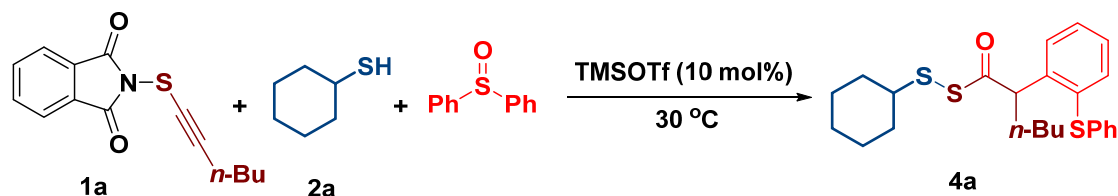

*N*-*n*-butylethynylthio phthalimide **1a** (0.15 mmol), cyclohexanethiol **2a** (0.18 mmol, 1.2 equiv.), phenyl sulfoxide (0.3 mmol, 2.5 equiv.) and TMSOTf (2.7  $\mu$ L, 10 mol%), were added one portion into a 10 mL flask. The reaction mixture was stirred at 30°C for 20 h. The solvent was removed in vacuum and the crude product was purified by flash column chromatography to give the desired product **4a** as colorless oil (82% yield).

### 3. Condition optimization

#### 3.1 Table S1. Condition optimization for disulfuration<sup>a</sup>

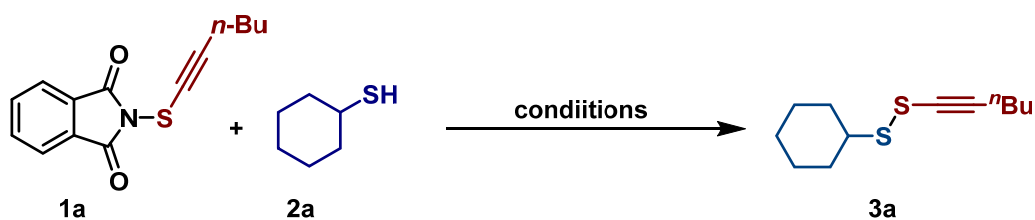

| Solvent                               | Catalyst (10 mol%) | Time   | Yield of <b>3a</b> (%) <sup>b</sup> |
|---------------------------------------|--------------------|--------|-------------------------------------|
| CH <sub>2</sub> Cl <sub>2</sub> (1 M) | --                 | 24 h   | 51                                  |
| MeOH (1 M)                            | --                 | 2 h    | 69                                  |
| MeOH (1 M)                            | TMSOTf             | 10 min | 77                                  |
| MeOH (1 M)                            | TfOH               | 1 min  | 80                                  |
| MeOH (1 M)                            | TFA                | 1 min  | 84                                  |

<sup>a</sup>. Conditions: **1a** (0.18 mmol), **2a** (0.15 mmol) and catalyst (10 mol%) in solvent (1.5 mL) were stirred at room temperature until **2a** was consumed completely. <sup>b</sup> Isolated yield.

#### Table S2 Condition optimization for disulfuration and oxyarylation<sup>a</sup>

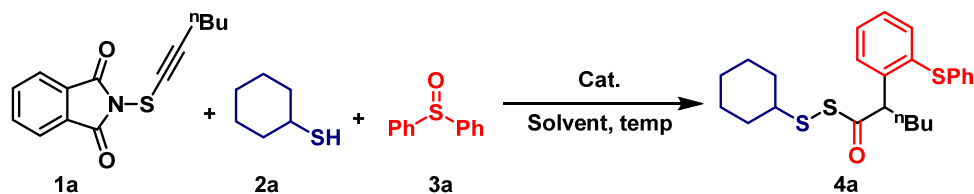

| Entry | Solvent         | Cat. (mol%)             | sulfoxide (equiv.) | Temp. (°C) | Yield (%) <sup>b</sup> |
|-------|-----------------|-------------------------|--------------------|------------|------------------------|
| 1     | -- <sup>c</sup> | TfOH (10)               | 2.5                | 16         | 23%                    |
| 2     | -- <sup>c</sup> | TfOH (10)               | 2.5                | 30         | 70%                    |
| 3     | -- <sup>c</sup> | TfOH (10)               | 2.5                | 50         | 67%                    |
| 4     | -- <sup>c</sup> | TfOH (10)               | 2.5                | 80         | 60%                    |
| 5     | -- <sup>c</sup> | TfOH (10)               | 1.5                | 30         | 65%                    |
| 6     | -- <sup>c</sup> | TfOH (10)               | 4.0                | 30         | 26%                    |
| 7     | -- <sup>c</sup> | Tf <sub>2</sub> NH (10) | 2.5                | 30         | 47%                    |
| 8     | -- <sup>c</sup> | Tf <sub>2</sub> O (10)  | 2.5                | 30         | 78%                    |
| 9     | -- <sup>c</sup> | TFA(10)                 | 2.5                | 30         | <10%                   |

|    |                                 |             |     |    |     |
|----|---------------------------------|-------------|-----|----|-----|
| 10 | -- <sup>c</sup>                 | TMSOTf (10) | 2.5 | 30 | 82% |
| 11 | -- <sup>c</sup>                 | TMSOTf (10) | 1.2 | 30 | 69% |
| 12 | -- <sup>c</sup>                 | TMSOTf (10) | 1.5 | 30 | 77% |
| 13 | TFE                             | TfOH(10)    | 2.5 | 30 | 47% |
| 14 | CH <sub>2</sub> Cl <sub>2</sub> | TfOH (10)   | 2.5 | 50 | 19% |

<sup>a</sup> Conditions: **1a** (0.15 mmol), **2a** (1.2 equiv), **3a** (m equiv) and **catalyst** (n mol%) were stirred at indicated temperature for 20 h. <sup>b</sup> Isolated yield. <sup>c</sup> No solvent was added.

## 4. Characterization of products

### 1-E cyclohexyl-2-(hex-1-yn-1-yl)disulfane (**3a**)

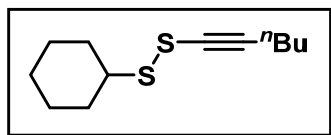

Yield: 28.7 mg (84%); time: 30 s; colorless liquid; TLC,  $R_f=0.40$  (PE:EtOAc = 99:1); <sup>1</sup>H NMR (CDCl<sub>3</sub>, 400 MHz):  $\delta$  3.00 (tt,  $J = 10.8, 3.6$  Hz, 1H), 2.33 (t,  $J = 6.8$  Hz, 2H), 2.18-2.03 (m, 2H), 1.83-1.79 (m, 2H), 1.66-1.61 (m, 1H), 1.54-1.27 (m, 9H), 0.91 (t,  $J = 7.2$  Hz, 3H); <sup>13</sup>C NMR (CDCl<sub>3</sub>, 100 MHz):  $\delta$  95.5, 70.7, 49.9, 32.5, 30.5, 26.0, 25.6, 21.9, 19.9, 13.6. HRMS (ESI)  $m/z$  calcd. for C<sub>12</sub>H<sub>21</sub>S<sub>2</sub> [M+H]<sup>+</sup>: 229.1079, found: 229.1083.

### 1-Benzyl-2-(hex-1-yn-1-yl)disulfane (**3b**)

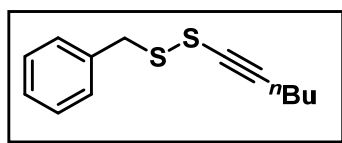

Yield: 21.2 mg (60%); time: 30 s; yellow liquid; TLC,  $R_f = 0.20$  (PE); <sup>1</sup>H NMR (CDCl<sub>3</sub>, 400 MHz):  $\delta$  7.35-7.34 (m, 3H), 7.32-7.28 (m, 2H), 4.12 (s, 2H), 2.32 (t,  $J = 6.8$  Hz, 2H), 1.53-1.46 (m, 2H), 1.43-1.38 (m, 2H), 0.92 (t,  $J = 7.2$  Hz, 3H); <sup>13</sup>C NMR (CDCl<sub>3</sub>, 100 MHz):  $\delta$  136.3, 129.5, 128.5, 127.6, 97.3, 68.9, 42.6, 30.5, 21.9, 19.9, 13.6. HRMS (ESI)  $m/z$  calcd. for C<sub>13</sub>H<sub>17</sub>S<sub>2</sub> [M+H]<sup>+</sup>: 237.0766, found: 237.0762.

### 1-Ethyl-2-(hex-1-yn-1-yl)disulfane (**3c**)

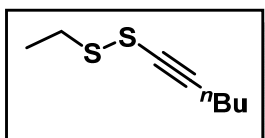

Yield: 15.4 mg (59%); time: 30 s; yellow liquid; TLC,  $R_f = 0.40$  (PE:EtOAc = 49:1);  $^1\text{H}$  NMR ( $\text{CDCl}_3$ , 400 MHz):  $\delta$  2.92 (q,  $J = 7.2$  Hz, 2H), 2.34 (t,  $J = 6.8$  Hz, 2H), 1.53-1.47 (m, 2H), 1.45-1.38 (m, 5H), 0.91 (t,  $J = 7.2$  Hz, 3H);  $^{13}\text{C}$  NMR ( $\text{CDCl}_3$ , 100 MHz):  $\delta$  96.5, 69.7, 32.5, 30.5, 21.9, 19.9, 14.2, 13.6. HRMS (ESI)  $m/z$  calcd. for  $\text{C}_8\text{H}_{15}\text{S}_2$   $[\text{M}+\text{H}]^+$ : 175.0610, found: 175.0603.

### 6-Ethyl 3-(hex-1-yn-1-yl)disulfanylopropanoate (3d)

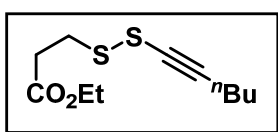

Yield: 29.5 mg (80%); time: 30 s; yellow liquid; TLC,  $R_f = 0.30$  (PE:EtOAc = 19:1);  $^1\text{H}$  NMR ( $\text{CDCl}_3$ , 400 MHz):  $\delta$  4.18-4.11 (m, 3H), 3.13 (t,  $J = 7.2$  Hz, 2H), 2.83 (t,  $J = 7.2$  Hz, 2H), 2.32 (t,  $J = 6.8$  Hz, 2H), 1.52-1.47 (m, 2H), 1.42-1.38 (m, 2H), 1.27-1.25 (m, 2H), 0.89 (t,  $J = 7.2$  Hz, 3H);  $^{13}\text{C}$  NMR ( $\text{CDCl}_3$ , 100 MHz):  $\delta$  171.5, 97.2, 69.2, 60.8, 33.9, 33.2, 30.4, 21.9, 19.9, 14.2, 13.5. HRMS (ESI)  $m/z$  calcd. for  $\text{C}_{11}\text{H}_{19}\text{O}_2\text{S}_2$   $[\text{M}+\text{H}]^+$ : 247.0821, found: 247.0816.

### 2-(Hex-1-yn-1-yl)disulfanylethan-1-ol (3e)

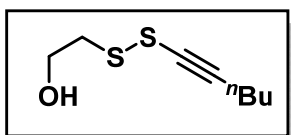

Yield: 26.0 mg (91%); time: 30 s; yellow liquid; TLC,  $R_f = 0.25$  (PE:EtOAc = 17:3);  $^1\text{H}$  NMR ( $\text{CDCl}_3$ , 400 MHz):  $\delta$  3.99 (t,  $J = 5.6$  Hz, 2H), 3.07 (t,  $J = 5.6$  Hz, 2H), 2.35 (t,  $J = 7.2$  Hz, 2H), 2.13 (s, 1H), 1.55-1.48 (m, 2H), 1.44-1.35 (m, 2H), 0.91 (t,  $J = 7.2$  Hz, 3H);  $^{13}\text{C}$  NMR ( $\text{CDCl}_3$ , 100 MHz):  $\delta$  97.8, 69.5, 59.7, 41.4, 30.4, 21.9, 19.8, 13.5. HRMS (ESI)  $m/z$  calcd. for  $\text{C}_8\text{H}_{15}\text{OS}_2$   $[\text{M}+\text{H}]^+$ : 191.0559, found: 191.0559.

### 1-(Tert-butyl)-2-(hex-1-yn-1-yl)disulfane (3f)

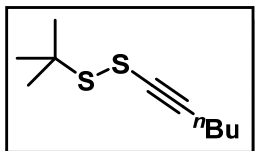

Yield: 26.7 mg (88%); time: 30 s; yellow liquid; TLC,  $R_f = 0.20$  (PE);  $^1\text{H}$  NMR ( $\text{CDCl}_3$ , 400 MHz):  $\delta$  2.30 (t,  $J = 6.8$  Hz, 2H), 1.52-1.45 (m, 2H), 1.42 (s, 9H), 1.40-1.35 (m, 2H), 0.90 (t,  $J = 7.2$  Hz, 3H);  $^{13}\text{C}$  NMR ( $\text{CDCl}_3$ , 100 MHz):  $\delta$  94.4, 71.4, 49.2, 30.5, 29.7, 21.9, 19.8, 13.5. HRMS (ESI)  $m/z$  calcd. for  $\text{C}_{10}\text{H}_{19}\text{S}_2$   $[\text{M} + \text{H}]^+$ : 203.0923, found: 203.0910.

### 1-(Hex-1-yn-1-yl)-2-trityldisulfane (3g)

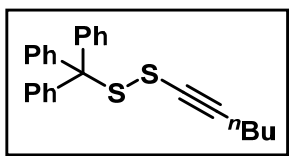

Yield: 46.0 mg (79%); time: 30 s; yellow liquid; TLC,  $R_f = 0.35$  (PE:EtOAc = 49:1);  $^1\text{H}$  NMR ( $\text{CDCl}_3$ , 400 MHz):  $\delta$  7.36-7.27 (m, 14H), 7.25-7.23 (m, 1H), 2.24 (t,  $J = 6.8$  Hz, 2H), 1.48-1.41 (m, 2H), 1.40-1.31 (m, 2H), 0.90 (t,  $J = 7.2$  Hz, 3H);  $^{13}\text{C}$  NMR ( $\text{CDCl}_3$ , 100 MHz):  $\delta$  143.4, 130.3, 127.8, 127.2, 97.0, 72.7, 68.9, 30.5, 21.9, 19.9, 13.6. HRMS (ESI)  $m/z$  calcd. for  $\text{C}_{25}\text{H}_{24}\text{S}_2\text{Na}$   $[\text{M} + \text{Na}]^+$ : 411.1212, found: 411.1211.

### 1-((3s,5s,7s)-Adamantan-1-yl)-2-(hex-1-yn-1-yl)disulfane (3h)

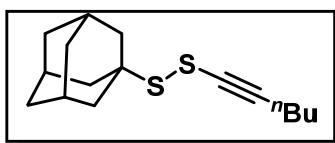

Yield: 36.1 mg (86%); time: 30 s; yellow liquid; TLC,  $R_f = 0.4$  (PE:EtOAc = 49:1);  $^1\text{H}$  NMR ( $\text{CDCl}_3$ , 400 MHz):  $\delta$  2.30 (t,  $J = 6.8$  Hz, 2H), 2.10 (s, 3H), 1.94 (d,  $J = 3.6$ , 6H), 1.7 (t,  $J = 2.4$  Hz, 6H), 1.53-1.44 (m, 2H), 1.42-1.35 (m, 2H), 0.90 (t,  $J = 7.2$  Hz, 3H);  $^{13}\text{C}$  NMR ( $\text{CDCl}_3$ , 100 MHz):  $\delta$  94.0, 71.9, 50.7, 42.3, 36.0, 30.5, 29.7, 21.9, 19.8, 13.5. HRMS (ESI)  $m/z$  calcd. for  $\text{C}_{16}\text{H}_{25}\text{S}_2$   $[\text{M} + \text{H}]^+$ : 281.1392, found: 281.1399.

### 1-Allyl-2-(hex-1-yn-1-yl)disulfane (3i)

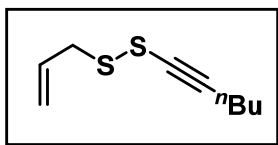

Yield: 24.3 mg (87%); time: 30 s; yellow liquid; TLC,  $R_f = 0.20$  (PE);  $^1\text{H}$  NMR ( $\text{CDCl}_3$ , 400 MHz):  $\delta$  5.94-5.84 (m, 1H), 5.27 (dq,  $J = 16.8, 3.0$  Hz, 1H), 5.21 (dt,  $J = 10.0, 0.4$  Hz, 1H), 3.53 (dt,  $J = 7.2, 0.8$  Hz, 2H), 2.35 (t,  $J = 7.2$  Hz, 2H), 1.53-1.50 (m, 2H), 1.44-1.40 (m, 2H), 0.92 (t,  $J = 7.2$  Hz, 3H);  $^{13}\text{C}$  NMR ( $\text{CDCl}_3$ , 100 MHz):  $\delta$  132.3, 119.3, 97.1, 69.2, 41.1, 30.5, 21.9, 19.9, 13.6. HRMS (ESI)  $m/z$  calcd. for  $\text{C}_9\text{H}_{15}\text{S}_2$   $[\text{M}+\text{H}]^+$ : 187.0610, found: 187.0609.

### 1-(Hex-1-yn-1-yl)-2-(prop-2-yn-1-yl)disulfane (3j)

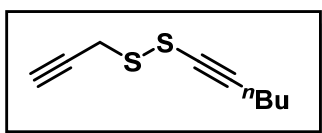

Yield: 20.1 mg (73%); time: 30 s; yellow liquid; TLC,  $R_f = 0.20$  (PE);  $^1\text{H}$  NMR ( $\text{CDCl}_3$ , 400 MHz):  $\delta$  3.66 (d,  $J = 2.8$  Hz, 2H), 2.37-2.33 (m, 3H), 1.54-1.48 (m, 2H), 1.43-1.38 (m, 2H), 0.91 (t,  $J = 7.2$  Hz, 3H);  $^{13}\text{C}$  NMR ( $\text{CDCl}_3$ , 100 MHz):  $\delta$  98.3, 78.5, 72.7, 68.3, 30.4, 26.4, 21.09, 19.9, 13.6. HRMS (ESI)  $m/z$  calcd. for  $\text{C}_9\text{H}_{13}\text{S}_2$   $[\text{M}+\text{H}]^+$ : 185.0453, found: 185.0441.

### 1-Ecyclohexyl-2-(prop-1-yn-1-yl)disulfane compound with triisopropyl- $\lambda^3$ -silane (1:1) (3k)

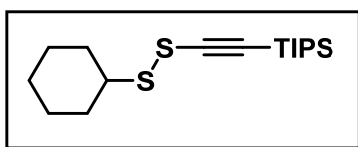

Yield: 42.7 mg (83%); time: 30 s; yellow liquid; TLC,  $R_f = 0.40$  (PE:EtOAc = 49:1);  $^1\text{H}$  NMR ( $\text{CDCl}_3$ , 400 MHz):  $\delta$  3.04 (tt,  $J = 10.8, 3.6$  Hz, 1H), 2.12-2.08 (m, 2H), 1.83-1.79 (m, 2H), 1.66-1.61 (m, 1H), 1.55-1.48 (m, 2H), 1.40-1.30 (m, 3H), 1.07 (s, 21H);  $^{13}\text{C}$  NMR ( $\text{CDCl}_3$ , 100 MHz):  $\delta$  98.6, 97.7, 50.4, 32.6, 26.0, 25.5, 18.5, 11.3. HRMS (ESI)  $m/z$  calcd. for  $\text{C}_{18}\text{H}_{36}\text{S}_2\text{Si}$   $[\text{M}+\text{H}]^+$ : 344.2022, found: 344.2024.

### 1-1-Ecyclohexyl-2-(cyclopropylethynyl)disulfane (3l)



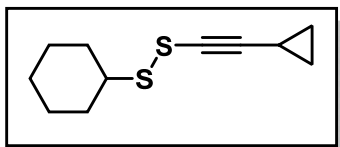

Yield: 27.3 mg (86%); time: 30 s; colorless liquid; TLC,  $R_f = 0.40$  (PE:EtOAc = 49:1);  $^1\text{H}$  NMR ( $\text{CDCl}_3$ , 400 MHz):  $\delta$  3.00 (tt,  $J = 10.4, 3.6$  Hz, 1H), 2.10-2.06 (m, 2H), 1.83-1.79 (m, 2H), 1.66-1.61 (m, 1H), 1.50-1.41 (m, 2H), 1.40-1.27 (m, 4H), 0.85-0.80 (m, 2H), 0.78-0.74 (m, 2H);  $^{13}\text{C}$  NMR ( $\text{CDCl}_3$ , 100 MHz):  $\delta$  99.6, 66.7, 49.8, 32.5, 25.9, 25.6, 9.2, 0.9. HRMS (ESI)  $m/z$  calcd. for  $\text{C}_{11}\text{H}_{16}\text{S}_2\text{Na}$   $[\text{M}+\text{Na}]^+$ : 235.0586, found: 235.0586.

### 1-Cyclohexyl-2-(phenylethynyl)disulfane (3m)

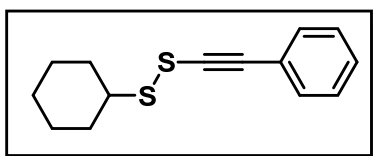

Yield: 28.3 mg (76%); time: 30 s; yellow liquid; TLC,  $R_f = 0.30$  (PE);  $^1\text{H}$  NMR ( $\text{CDCl}_3$ , 400 MHz):  $\delta$  7.45-7.42 (m, 2H), 7.32-7.29 (m, 3H), 3.09 (tt,  $J = 10.8, 3.6$  Hz, 1H), 2.16-2.12 (m, 2H), 1.87-1.81 (m, 2H), 1.67-1.63 (m, 1H), 1.55-1.48 (m, 2H), 1.43-1.31 (m, 3H);  $^{13}\text{C}$  NMR ( $\text{CDCl}_3$ , 100 MHz):  $\delta$  131.8, 128.6, 128.3, 122.8, 93.2, 81.4, 50.1, 32.5, 26.0, 25.5. HRMS (ESI)  $m/z$  calcd. for  $\text{C}_{14}\text{H}_{17}\text{S}_2$   $[\text{M}+\text{H}]^+$ : 249.0766, found: 249.0775.

### Eyclohexyl-2-(p-tolyethynyl)disulfane (3n)

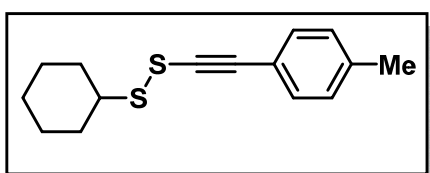

Yield: 19.7 mg (50%); time: 30 s; yellow liquid; TLC,  $R_f = 0.20$  (PE);  $^1\text{H}$  NMR ( $\text{CDCl}_3$ , 400 MHz):  $\delta$  7.33 (d,  $J = 8.0$  Hz, 2H), 7.12 (d,  $J = 8.0$  Hz, 2H), 3.09 (tt,  $J = 10.8, 3.6$  Hz, 1H), 2.35 (s, 1H), 2.16-2.12 (m, 2H), 1.85-1.81 (m, 2H), 1.67-1.61 (m, 1H), 1.54-1.47 (m, 2H), 1.42-1.31 (m, 3H);  $^{13}\text{C}$  NMR ( $\text{CDCl}_3$ , 100 MHz):  $\delta$  139.0, 131.9, 129.1, 119.7, 93.5, 80.5, 50.1, 32.5, 26.0, 25.6, 21.5. HRMS (ESI)  $m/z$  calcd. for  $\text{C}_{15}\text{H}_{19}\text{S}_2$   $[\text{M}+\text{H}]^+$ : 263.0923, found: 263.0938.

### 1-Cyclohexyl-2-((4-fluorophenyl)ethynyl)disulfane (3o)

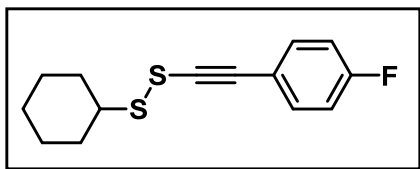

Yield: 19.2 mg (48%); time: 30 s; light yellow liquid; TLC,  $R_f = 0.30$  (PE);  $^1\text{H}$  NMR ( $\text{CDCl}_3$ , 400 MHz):  $\delta$  7.45-7.40 (m, 2H), 7.01 (tt,  $J = 8.4$ , 2 Hz, 2H), 3.08 (tt,  $J = 10.8$ , 3.6 Hz, 1H), 2.16-2.11 (m, 2H), 1.86-1.81 (m, 2H), 1.68-1.63 (m, 1H), 1.50 (td,  $J = 10.4$ , 2.4 Hz, 2H), 1.43-1.31 (m, 3H);  $^{13}\text{C}$  NMR ( $\text{CDCl}_3$ , 100 MHz):  $\delta$  162.7 ( $J = 249.0$  Hz), 134.0 ( $J = 9.0$  Hz), 118.9 ( $J = 4.0$  Hz), 115.67 ( $J = 22.0$  Hz), 92.1, 81.2, 50.2, 32.5, 26.0, 25.6;  $^{19}\text{F}$  NMR ( $\text{CDCl}_3$ , 376.3 MHz):  $\delta$  -109.84. HRMS (ESI)  $m/z$  calcd. for  $\text{C}_{14}\text{H}_{16}\text{FS}_2$   $[\text{M}+\text{H}]^+$ : 267.0672, found: 267.0669.

### Methyl *N*-(tert-butoxycarbonyl)-*S*-(hex-1-yn-1-ylthio)-*L*-cysteinate (3p)

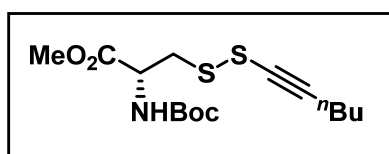

Yield: 38.0 mg (73%); time: 30 s; yellow liquid; TLC,  $R_f = 0.30$  (PE:EtOAc = 10:1);  $^1\text{H}$  NMR ( $\text{CDCl}_3$ , 400 MHz):  $\delta$  5.45 (d,  $J = 8.0$  Hz, 1H), 4.72-4.67 (m, 1H), 3.78 (s, 3H), 3.37 (d,  $J = 4.8$  Hz, 2H), 2.37 (t,  $J = 6.8$  Hz, 2H), 1.57-1.49 (m, 2H), 1.45 (s, 9H), 1.42-1.38 (m, 2H), 0.91 (t,  $J = 7.2$  Hz, 3H);  $^{13}\text{C}$  NMR ( $\text{CDCl}_3$ , 100 MHz):  $\delta$  170.9, 155.1, 98.7, 80.2, 68.7, 52.6, 40.6, 30.4, 28.3, 28.1, 21.9, 19.9, 13.6. HRMS (ESI)  $m/z$  calcd. for  $\text{C}_{15}\text{H}_{25}\text{NO}_4\text{S}_2\text{Na}$   $[\text{M}+\text{Na}]^+$ : 370.1117, found: 370.1129.

### *N*-Acetyl-*S*-(hex-1-yn-1-ylthio)-*L*-cysteine (3q)

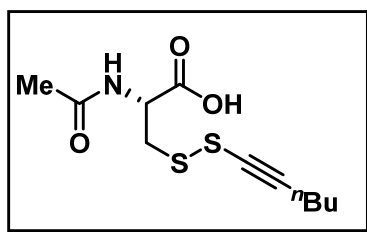

Yield: 22.7 mg (55%); time: 30 s; yellow liquid; TLC,  $R_f = 0.30$  (MeOH:DCM = 1.5:10);  $^1\text{H}$  NMR ( $\text{CDCl}_3$ , 400 MHz):  $\delta$  8.93 (s, 1H), 6.82 (d,  $J = 7.2$  Hz, 1H), 4.95 (d,  $J = 4.0$  Hz, 1H), 3.42 (qd,  $J = 14.8$ , 4.0 Hz, 2H), 2.37 (t,  $J = 6.8$  Hz, 2H), 2.1 (s, 3H), 1.56-1.49 (m, 2H), 1.45-1.36 (m, 2H), 0.91 (t,  $J = 7.2$  Hz, 3H);  $^{13}\text{C}$  NMR ( $\text{CDCl}_3$ , 100 MHz):  $\delta$

171.6, 167.7, 98.9, 69.0, 52.4, 39.7, 30.4, 22.9, 22.0, 20.0, 13.6. HRMS (ESI)  $m/z$  calcd. for  $C_{11}H_{17}NO_3S_2Na$   $[M+Na]^+$ : 298.0542, found: 298.0558.

**Methyl *N*-((*tert*-butoxycarbonyl)glycyl)-*S*-(hex-1-yn-1-ylthio)-*L*-cysteinate (3r)**

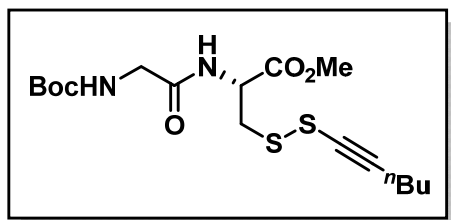

Yield: 44.8 mg (74%); time: 30 s; yellow liquid; TLC,  $R_f$  = 0.3 (PE:EtOAc = 7:3);  $^1H$  NMR ( $CDCl_3$ , 400 MHz):  $\delta$  7.00 (d,  $J$  = 7.2 Hz, 1H), 5.19 (s, 1H), 4.98 (dt,  $J$  = 7.6, 2.8 Hz, 1H), 3.86 (d,  $J$  = 5.2 Hz, 2H), 3.78 (s, 3H), 3.39 (ddd,  $J$  = 24.0, 14.8, 4.8 Hz, 2H), 2.37 (t,  $J$  = 6.8 Hz, 2H), 1.54-1.48 (m, 2H), 1.45 (s, 9H), 1.43-1.37 (m, 2H), 0.91 (t,  $J$  = 7.2 Hz, 3H);  $^{13}C$  NMR ( $CDCl_3$ , 100 MHz):  $\delta$  170.3, 169.2, 155.7, 98.9, 80.3, 68.6, 52.8, 51.7, 44.1, 39.6, 30.4, 28.3, 21.9, 19.9, 13.5. HRMS (ESI)  $m/z$  calcd. for  $C_{17}H_{28}N_2O_5S_2Na$   $[M+Na]^+$ : 427.1332, found: 427.1326.

**Methyl *N*-((*tert*-butoxycarbonyl)-*L*-leucyl)-*S*-(hex-1-yn-1-ylthio)-*L*-cysteinate (3s)**

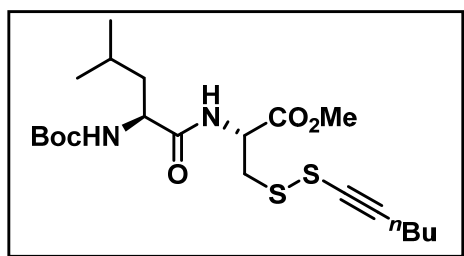

Yield: 65.6 mg (95%); time: 30 s; yellow liquid; TLC,  $R_f$  = 0.30 (PE:EtOAc = 4:1);  $^1H$  NMR ( $CDCl_3$ , 400 MHz):  $\delta$  7.02 (d,  $J$  = 7.2 Hz, 1H), 4.94-4.87 (m, 2H), 4.16 (s, 1H), 3.77 (s, 3H), 3.48 (ddd,  $J$  = 42.8, 14.8, 4.8 Hz), 2.37 (t,  $J$  = 6.8 Hz, 2H), 1.72-1.65 (m, 2H), 1.55-1.37 (m, 14H), 0.94-0.89 (m, 9H);  $^{13}C$  NMR ( $CDCl_3$ , 100 MHz):  $\delta$  172.4, 170.3, 155.5, 98.6, 80.2, 68.7, 53.0, 52.7, 51.7, 41.0, 39.4, 30.4, 28.3, 24.7, 22.9, 21.9, 19.9, 13.5. HRMS (ESI)  $m/z$  calcd. for  $C_{21}H_{36}N_2O_5S_2Na$   $[M+Na]^+$ : 483.1958, found: 483.1959.

**Methyl *N*-((*tert*-butoxycarbonyl)-*L*-phenylalanyl)-*S*-(hex-1-yn-1-ylthio)-*L*-cysteinate (3t)**

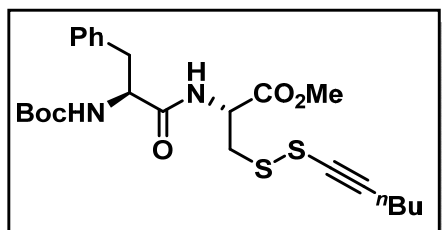

Yield: 65 mg (88%); time: 30 s; white solid; TLC,  $R_f = 0.2$  (PE:EtOAc = 4:1);  $^1\text{H}$  NMR ( $\text{CDCl}_3$ , 400 MHz):  $\delta$  7.35-7.26 (m, 2H), 7.25-7.18 (m, 3H), 6.82 (d, 1H,  $J = 8.0$  Hz), 4.96 (brs, 1H), 4.90-4.80 (m, 1H), 4.41 (brs, 1H), 3.76 (s, 3H), 3.40 (dd, 1H,  $J = 12.0, 4.0$  Hz), 3.30 (dd, 1H,  $J = 12.0, 4.0$  Hz), 3.15-3.01 (m, 2H), 2.36 (t, 2H,  $J = 8.0$  Hz), 1.56-1.48 (m, 2H), 1.41 (m, 11H), 0.91 (t, 3H,  $J = 8.0$  Hz);  $^{13}\text{C}$  NMR ( $\text{CDCl}_3$ , 100 MHz):  $\delta$  171.1, 170.1, 155.3, 136.4, 129.3, 128.7, 127.0, 98.8, 80.4, 68.7, 55.6, 52.7, 51.8, 39.5, 38.1, 30.43, 28.2, 21.9, 19.9, 13.5. HRMS (ESI)  $m/z$  calcd. for  $\text{C}_{24}\text{H}_{35}\text{N}_2\text{O}_5\text{S}_2$   $[\text{M}+\text{H}]^+$ : 495.1982, found: 495.1982.

**Methyl *N*-((*S*)-2-((*tert*-butoxycarbonyl)amino)-2-phenylacetyl)-*S*-(hex-1-yn-1-ylthio)-*L*-cysteinate (3u)**

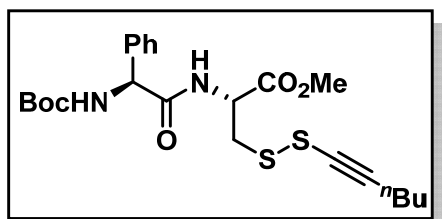

Yield: 64.1 mg (89%); time: 30 s; white solid; TLC,  $R_f = 0.2$  (PE:EtOAc = 4:1);  $^1\text{H}$  NMR ( $\text{CDCl}_3$ , 400 MHz):  $\delta$  7.40-7.30 (m, 5H), 6.75 (d,  $J = 11.2$  Hz, 1H), 5.69 (s, 1H), 5.21 (s, 1H), 4.94-4.90 (m, 1H), 3.71 (s, 3H), 3.39 (ddd,  $J = 42.6, 14.4, 4.4$  Hz, 2H), 2.34 (t,  $J = 6.8$  Hz, 2H), 1.55-1.47 (m, 2H), 1.42 (s, 9H), 1.39-1.35 (m, 2H), 0.91 (t,  $J = 7.2$  Hz, 3H);  $^{13}\text{C}$  NMR ( $\text{CDCl}_3$ , 100 MHz):  $\delta$  170.0, 154.9, 137.7, 128.9, 128.4, 127.3, 123.4, 98.8, 80.1, 68.6, 58.7, 52.7, 52.0, 39.4, 30.4, 28.2, 21.9, 19.9, 13.5; HRMS (ESI)  $m/z$  calcd. for  $\text{C}_{23}\text{H}_{32}\text{N}_2\text{O}_5\text{S}_2\text{Na}$   $[\text{M}+\text{Na}]^+$ : 503.1645, found: 503.1659.

***tert*-Butyl (*S*)-2-(((*R*)-3-(hex-1-yn-1-yl)disulfanyl)-1-methoxy-1-oxopropan-2-yl)carbamoylpyrrolidine-1-carboxylate (3v)**

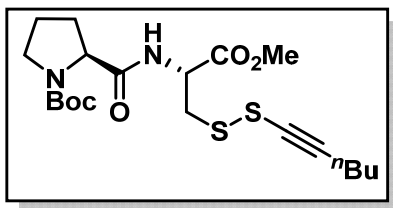

Yield: 50.0 mg (75%); time: 30 s; yellow liquid; TLC,  $R_f = 0.30$  (PE:EtOAc = 7:3); <sup>1</sup>H NMR (isomers, CDCl<sub>3</sub>, 400 MHz):  $\delta$  7.64 (s, 0.5H), 6.93 (s, 0.5H), 4.91 (d,  $J = 27.6$  Hz, 1H), 4.28 (d,  $J = 36$  Hz, 1H), 3.75 (s, 3H), 3.45-3.32 (m, 4H), 2.34 (t,  $J = 6.8$  Hz, 2H), 2.13 (s, 1H), 1.90-1.83 (m, 2H), 1.53-1.47 (m, 2H), 1.44 (s, 9H), 1.40-1.33 (m, 3H), 0.89 (t,  $J = 7.2$  Hz, 3H); <sup>13</sup>C NMR (isomers, CDCl<sub>3</sub>, 100 MHz):  $\delta$  172.6 (171.9), 170.4 (170.1), 155.7 (154.6), 98.8 (98.3), 80.7 (80.4), 68.4, 61.1(59.8), 52.6, 51.5, 47.0, 39.6, 31.0, 30.3, 28.2, 24.5(23.7), 21.9, 19.9, 13.5; HRMS (ESI)  $m/z$  calcd. for C<sub>20</sub>H<sub>32</sub>N<sub>2</sub>O<sub>5</sub>S<sub>2</sub>Na [M+Na]<sup>+</sup>: 467.1645, found: 467.1641.

### Ac-Ala-Cys-Gly-Phe-NH<sub>2</sub>-SS-alkynyl-TIPS (3w)

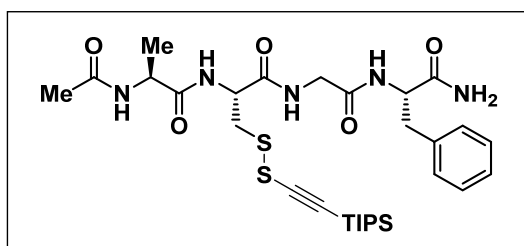

The product was purified by preparative HPLC. Yield: 42 mg (66%); time: 2 h; white solid; LRMS (MALDI/QTOF)  $m/z$ : [M+Na]<sup>+</sup> C<sub>30</sub>H<sub>47</sub>N<sub>5</sub>O<sub>5</sub>S<sub>2</sub>SiNa, Calcd. 672.264, found 672.268; [M+K]<sup>+</sup> C<sub>30</sub>H<sub>47</sub>N<sub>5</sub>O<sub>5</sub>S<sub>2</sub>SiK, Calcd. 688.242, found 688.235; HRMS (ESI/microTOF)  $m/z$ : [M+H]<sup>+</sup> C<sub>30</sub>H<sub>48</sub>N<sub>5</sub>O<sub>5</sub>S<sub>2</sub>Si Calcd. 650.2861, found: 650.2860.

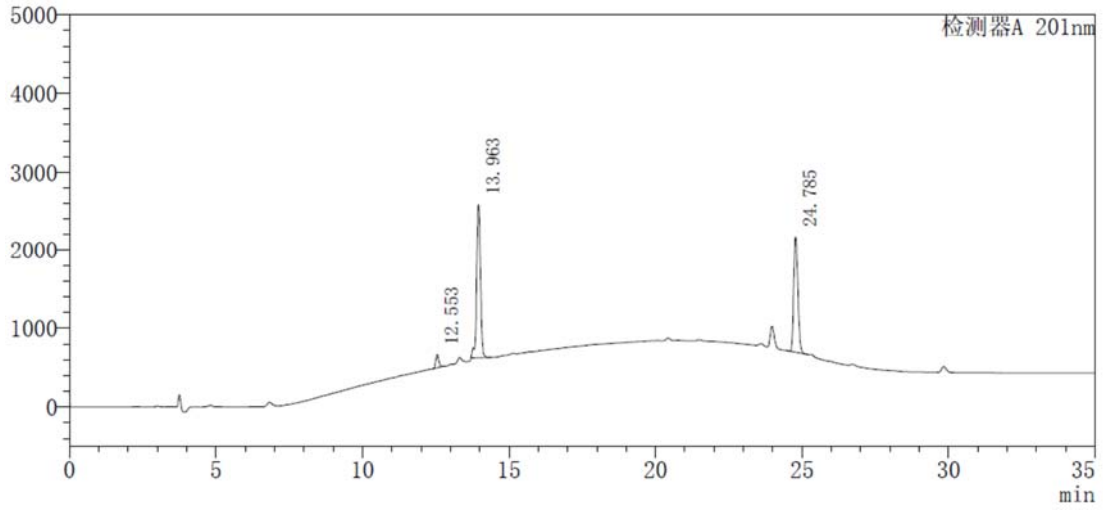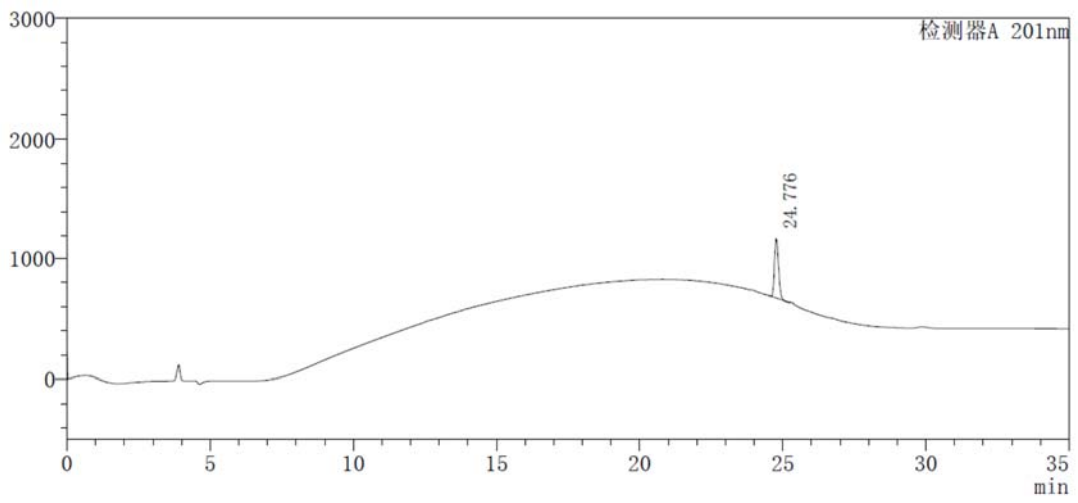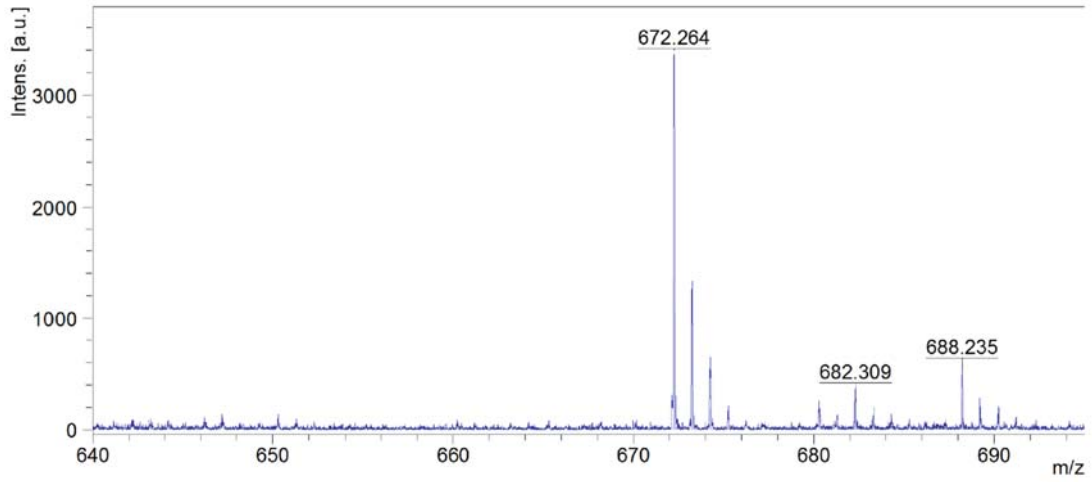

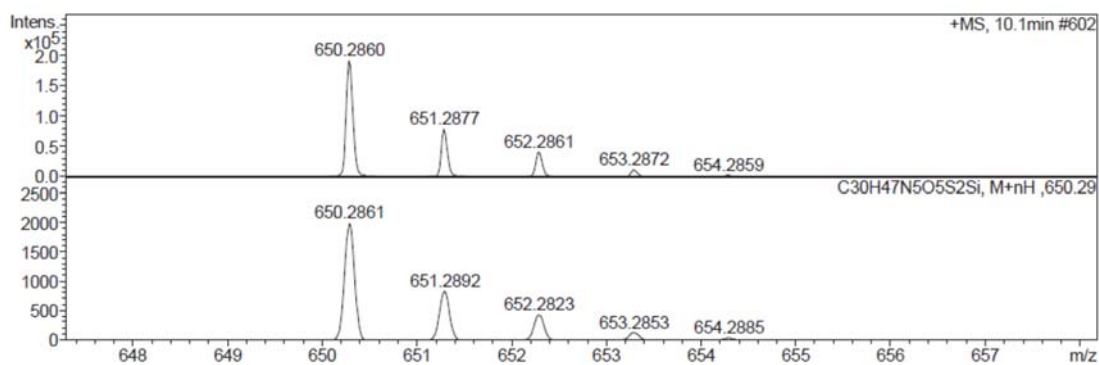

### Ala-Cys-Tyr-Gly-Ala-Leu-NH<sub>2</sub>-SS-alkynyl-TIPS (3x)

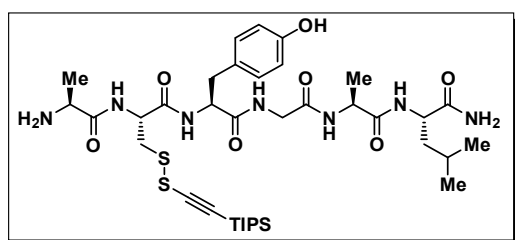

The product was purified by preparative HPLC. Yield: 48 mg (60%); time: 2 h; white solid; LRMS (MALDI/QTOF)  $m/z$ :  $[M+Na]^+$  C<sub>37</sub>H<sub>61</sub>N<sub>7</sub>O<sub>7</sub>S<sub>2</sub>SiNa, Calcd. 830.374, found 830.384;  $[M+K]^+$  C<sub>37</sub>H<sub>61</sub>N<sub>7</sub>O<sub>7</sub>S<sub>2</sub>SiK, Calcd. 846.346, found 846.364. HRMS (ESI/microTOF)  $m/z$ :  $[M+H]^+$  C<sub>37</sub>H<sub>62</sub>N<sub>7</sub>O<sub>7</sub>S<sub>2</sub>Si Calcd. 808.3916, found: 808.3909.

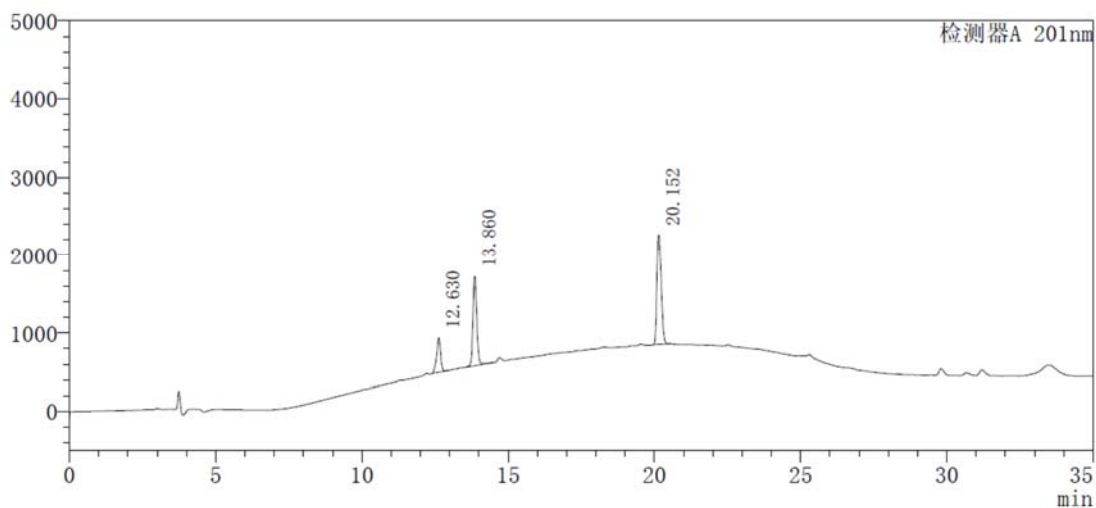

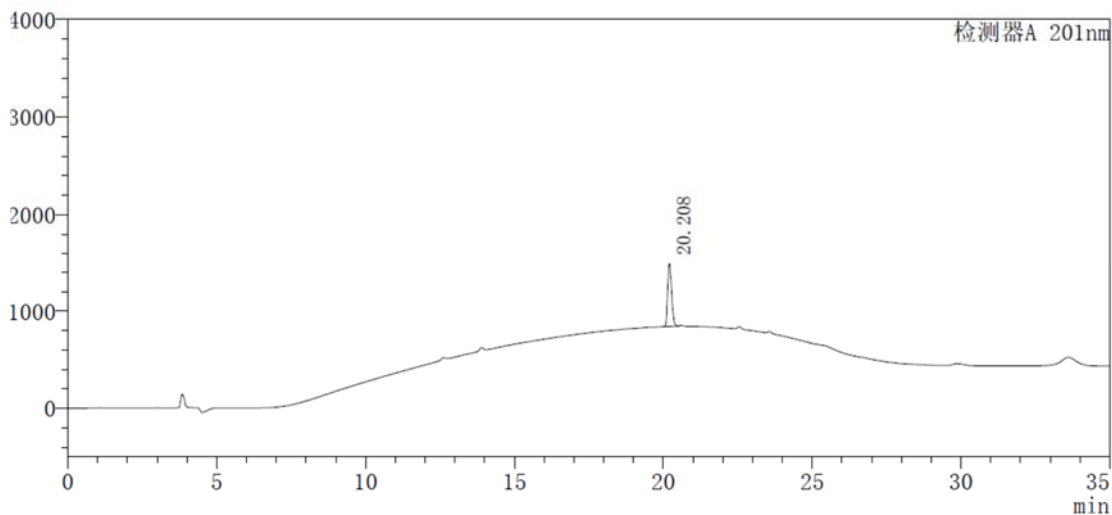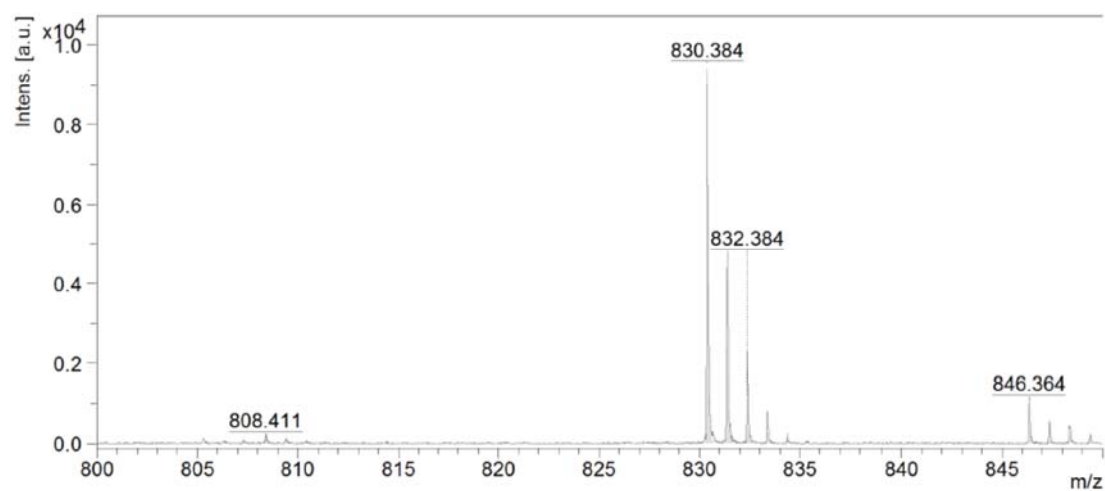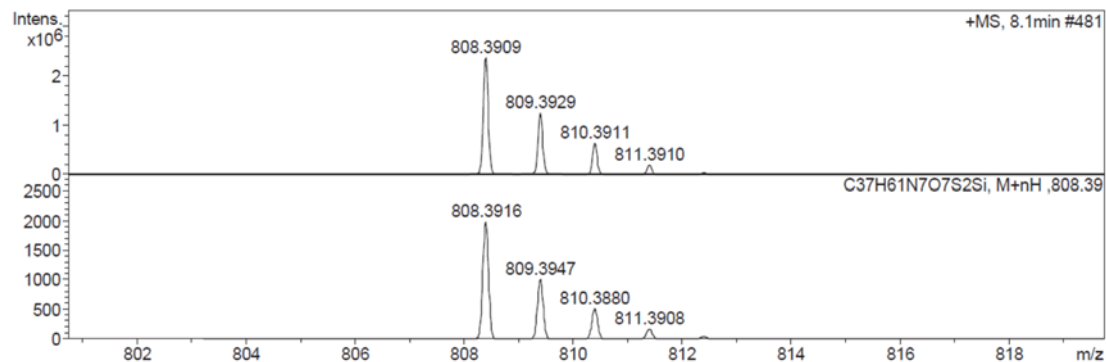

### (2-(Hex-1-yn-1-yl)disulfanyl)propanoic acid (3y)

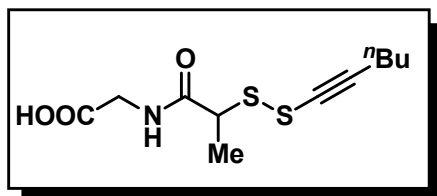

Yield: 38.4 mg (93%); time: 30 s; light yellow solid; TLC,  $R_f$  = 0.30 (MeOH:DCM =1:4);  $^1\text{H NMR}$  (CDCl<sub>3</sub>, 400 MHz):  $\delta$  8.82 (s, 1H), 6.83 (t,  $J$  = 4.4 Hz, 1H), 4.13 (ddd,  $J$  = 28.4, 28.8 5.2 Hz, 2H), 3.79 (q,  $J$  = 7.2 Hz, 1H), 2.33 (t,  $J$  = 7.2 Hz, 2H), 1.60 (d,  $J$



= 7.2 Hz, 3H), 1.53-1.46 (m, 2H), 1.43-1.34 (m, 2H), 0.90 (t,  $J = 7.2$  Hz, 3H);  $^{13}\text{C}$  NMR ( $\text{CDCl}_3$ , 100 MHz):  $\delta$  173.3, 171.6, 98.2, 68.5, 49.1, 41.7, 30.4, 21.9, 19.9, 17.0, 13.5; HRMS (ESI)  $m/z$  calcd. for  $\text{C}_{11}\text{H}_{17}\text{NO}_3\text{S}_2\text{Na}$   $[\text{M}+\text{Na}]^+$ : 298.0542, found: 298.0533.

**((S)-3-(hex-1-yn-1-yl)disulfanyl)-2-methylpropanoyl)-L-proline (3z)**

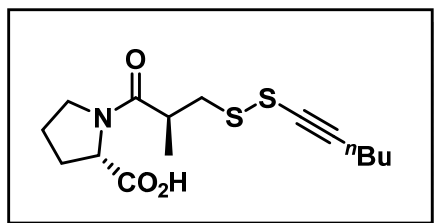

Yield: 46.4 mg (94%); time: 30 s; yellow liquid; TLC,  $R_f = 0.30$  (MeOH:DCM = 1:9);  $^1\text{H}$  NMR ( $\text{CDCl}_3$ , 400 MHz):  $\delta$  9.80 (s, 1H), 4.60-4.58 (m, 1H), 3.71-3.65 (m, 2H), 3.29-3.16 (m, 2H), 2.88 (dd,  $J = 12.8, 4.8$  Hz, 1H), 2.33 (t,  $J = 6.8$  Hz, 3H), 2.16-2.01 (m, 3H), 1.53-1.46 (m, 2H), 1.43-1.34 (m, 2H), 1.28 (d,  $J = 6.8$  Hz, 3H), 0.90 (t,  $J = 7.2$  Hz, 3H);  $^{13}\text{C}$  NMR ( $\text{CDCl}_3$ , 100 MHz):  $\delta$  175.5, 174.0, 97.5, 68.9, 59.5, 47.4, 41.2, 37.5, 30.5, 27.9, 24.8, 21.9, 19.9, 16.6, 13.5. HRMS (ESI)  $m/z$  calcd. for  $\text{C}_{15}\text{H}_{23}\text{NO}_3\text{S}_2\text{Na}$   $[\text{M}+\text{Na}]^+$ : 352.1012, found: 352.1012.

**(S)-2-amino-3-methyl-3-(((triisopropylsilyl)ethynyl)disulfanyl)butanoic acid(3aa')**

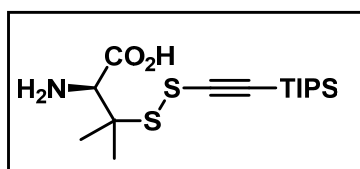

The product was purified by preparative HPLC. Yield: 40.0 mg (74%); time: 4 h; light yellow oil; TLC,  $R_f = 0.1$  (MeOH:DCM = 1:10);  $^1\text{H}$  NMR ( $\text{CDCl}_3$ , 400 MHz):  $\delta$  7.49 (s, 2H), 4.12 (s, 1H), 1.76 (s, 3H), 1.45 (s, 3H), 1.06 (s, 21H);  $^{13}\text{C}$  NMR ( $\text{CDCl}_3$ , 100 MHz):  $\delta$  170.3, 100.7, 95.2, 59.8, 52.8, 26.9, 21.8, 18.5, 11.3. HRMS (ESI)  $m/z$  calcd. for  $\text{C}_{16}\text{H}_{31}\text{NO}_2\text{S}_2\text{SiNa}$   $[\text{M}+\text{Na}]^+$ : 384.1458, found: 384.1464.

**(2R,3R,4S,5R,6S)-2-(Acetoxymethyl)-6-(hex-1-yn-1-yl)disulfanyl)tetrahydro-2H-pyran-3,4,5-triyl triacetate (3ab')**

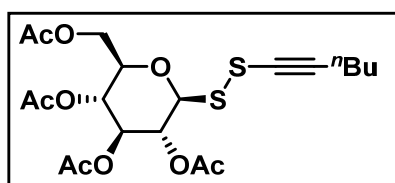

Yield: 47.8 mg (67%); time: 30 s; white solid; TLC,  $R_f$  = 0.30 (PE:EtOAc = 4:1);  $^1\text{H}$  NMR ( $\text{CDCl}_3$ , 400 MHz):  $\delta$  5.25 (t,  $J$  = 9.2 Hz, 1H), 5.19-5.11 (m, 2H), 4.72 (d,  $J$  = 9.6 Hz, 1H), 4.25 (dd,  $J$  = 12.4, 4.4 Hz, 1H), 4.15 (dd,  $J$  = 12.4, 2.4 Hz, 1H), 3.77 (dq,  $J$  = 10.0, 2.4 Hz, 1H), 2.31 (t,  $J$  = 6.8 Hz, 2H), 2.07 (s, 3H), 2.02 (d,  $J$  = 2.0 Hz, 5H), 2.00 (s, 3H), 1.51-1.44 (m, 2H), 1.42-1.33 (m, 2H), 0.88 (t,  $J$  = 7.2 Hz, 3H);  $^{13}\text{C}$  NMR ( $\text{CDCl}_3$ , 100 MHz):  $\delta$  170.6, 170.2, 169.3, 169.1, 97.7, 87.0, 76.2, 73.7, 69.5, 68.7, 67.9, 61.9, 30.3, 21.9, 20.7, 20.60, 20.57, 20.5, 19.8, 13.5. HRMS (ESI)  $m/z$  calcd. for  $\text{C}_{20}\text{H}_{28}\text{O}_9\text{S}_2\text{Na}$   $[\text{M}+\text{Na}]^+$ : 499.1067, found: 499.1074.

**(2R,3R,4S,5R,6R)-2-(acetoxymethyl)-6-(((2R,3R,4S,5R)-4,5-diacetoxy-2-(acetoxymethyl)-6-(((triisopropylsilyl)ethynyl)disulfanyl)tetrahydro-2H-pyran-3-yl)oxy)tetrahydro-2H-pyran-3,4,5-triyl triacetate(3ac')**

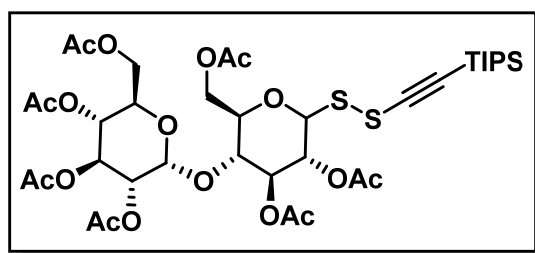

Yield: 58.3 mg (45%); time: 30 s; colorless liquid; TLC,  $R_f$  = 0.25 (PE:EtOAc = 7:3);  $^1\text{H}$  NMR ( $\text{CDCl}_3$ , 400 MHz):  $\delta$  5.40-5.31 (m, 3H), 5.05 (t,  $J$  = 9.6 Hz, 1H), 4.95 (t,  $J$  = 9.2 Hz, 1H), 4.87-4.82 (m, 2H), 4.41 (dd,  $J$  = 12.0, 2.4 Hz, 1H), 4.23 (dd,  $J$  = 12.4, 4.4 Hz, 2H), 4.05-3.93 (m, 3H), 3.79-3.75 (m, 1H), 2.14 (s, 3H), 2.09 (s, 3H), 2.04 (s, 3H), 2.02 (s, 3H), 1.99 (s, 6H), 1.06 (s, 21H);  $^{13}\text{C}$  NMR ( $\text{CDCl}_3$ , 100 MHz):  $\delta$  170.6, 170.54, 170.49, 170.1, 169.9, 169.6, 169.4, 101.3, 95.7, 94.9, 86.5, 76.5, 76.1, 72.8, 70.6, 70.0, 69.3, 68.6, 67.9, 63.2, 61.5, 35.4, 29.7, 20.9, 20.8, 20.7, 20.62, 20.60, 18.6, 11.2. HRMS (ESI)  $m/z$  calcd. for  $\text{C}_{37}\text{H}_{60}\text{O}_{17}\text{S}_2\text{SiN}$   $[\text{M}+\text{NH}_4]^+$ : 882.3066, found: 882.3065.

**Cyclohexyl 2-(2-(phenylthio)phenyl)hexanoate (dithioperoxoate) (4a)**

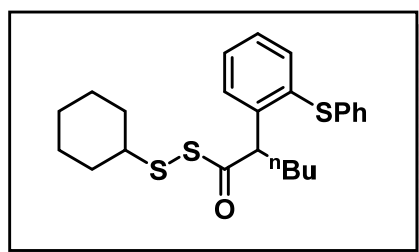

Yield: 52.0 mg (82%); time: 20 h; yellow liquid; TLC,  $R_f=0.20$  (PE:EtOAc = 49:1);  $^1\text{H}$  NMR ( $\text{CDCl}_3$ , 400 MHz):  $\delta$  7.41 (t,  $J = 8.0$  Hz, 2H), 7.35-7.27 (m, 2H), 7.26-7.22 (m, 3H), 7.21-7.17 (m, 2H), 4.75 (t,  $J = 8.0$  Hz, 1H), 2.69-2.63 (m, 1H), 2.16-2.07 (m, 1H), 1.85-1.89 (m, 1H), 1.73-1.68 (m, 1H), 1.56-1.53 (m, 1H), 1.28-1.17 (m, 9H), 0.80 (t,  $J = 8.0$  Hz, 3H);  $^{13}\text{C}$  NMR ( $\text{CDCl}_3$ , 100 MHz):  $\delta$  199.6, 140.1, 136.7, 134.9, 134.4, 131.0, 129.6, 129.1, 128.8, 128.5, 128.3, 127.0, 126.5, 55.3, 49.6, 33.6, 32.5, 29.5, 25.9, 25.4, 22.4, 13.8; HRMS (ESI)  $m/z$  calcd. for  $\text{C}_{24}\text{H}_{30}\text{NaOS}_3$   $[\text{M}+\text{Na}]^+$ : 453.1351, found: 453.1351.

**(Adamantan-1-yl) 2-(2-(phenylthio)phenyl)hexane(dithioperoxoate) (4b)**

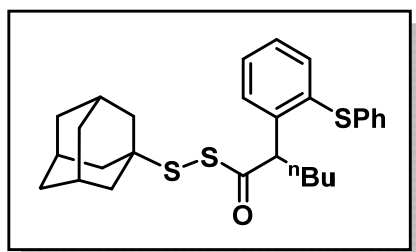

Yield: 51.1 mg (71%); time: 20 h; yellow liquid; TLC,  $R_f=0.20$  (PE:EtOAc = 49:1);  $^1\text{H}$  NMR ( $\text{CDCl}_3$ , 400 MHz):  $\delta$  7.425 (dd,  $J = 12.0, 8.0$  Hz, 2H), 7.33-7.28 (m, 2H), 7.27-7.18 (m, 5H), 4.80 (t,  $J = 8.0$  Hz, 1H), 2.16-2.10 (m, 1H), 2.00 (s, 3H), 1.72 (s, 7H), 1.66-1.54 (m, 7H), 1.29-1.12 (m, 4H), 0.81 (t,  $J = 8.0$  Hz, 1H);  $^{13}\text{C}$  NMR ( $\text{CDCl}_3$ , 100 MHz): 199.6, 140.2, 136.7, 134.8, 134.5, 129.6, 129.1, 128.7, 128.4, 128.2, 126.5, 55.3, 50.6, 42.2, 35.9, 33.5, 29.8, 29.5, 22.4, 13.8; HRMS (ESI)  $m/z$  calcd. for  $\text{C}_{28}\text{H}_{34}\text{NaOS}_3$   $[\text{M}+\text{Na}]^+$ : 505.1664, found: 505.1657.

**Ethyl 3-((2-(2-(phenylthio)phenyl)hexanoyl)disulfaneyl)propanoate (4c)**

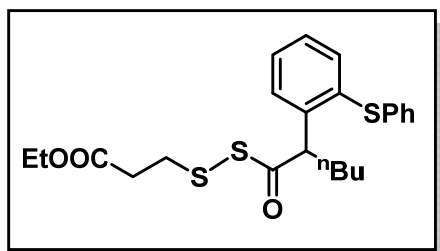

Yield: 17.3 mg (24%); time: 20 h; yellow liquid; TLC,  $R_f=0.20$  (PE:EtOAc = 49:1);  $^1\text{H}$  NMR ( $\text{CDCl}_3$ , 400 MHz):  $\delta$  7.44 (d,  $J = 8.0$  Hz, 1H), 7.40 (d,  $J = 8.0$  Hz, 1H), 7.33 (t,  $J = 8.0$  Hz, 1H), 7.27-7.24 (m, 3H), 7.23-7.19 (m, 3H), 4.72 (t,  $J = 8.0$  Hz, 1H), 4.16-

4.11 (m, 2H), 2.86-2.83 (m, 2H), 2.55-2.52 (m, 2H), 2.17-2.08 (m, 1H), 1.77-1.68 (m, 1H), 1.25 (t,  $J = 8.0$  Hz, 7H), 0.82-0.79 (m, 3H);  $^{13}\text{C}$  NMR ( $\text{CDCl}_3$ , 100 MHz):  $\delta$  198.6, 171.3, 139.8, 136.6, 135.0, 134.4, 129.5, 129.2, 128.9, 128.6, 128.4, 126.6, 60.8, 55.5, 33.9, 33.4, 29.7, 29.5, 22.4, 14.2, 13.8; HRMS (ESI)  $m/z$  calcd. for  $\text{C}_{23}\text{H}_{28}\text{NaO}_3\text{S}_3$   $[\text{M}+\text{Na}]^+$ : 471.1093, found: 471.1094.

**2-(Acetoxymethyl)-6-((2-(2-(phenylthio)phenyl)hexanoyl)disulfaneyl)tetrahydro-2H-pyran-3,4,5-triyl triacetate (4d)**

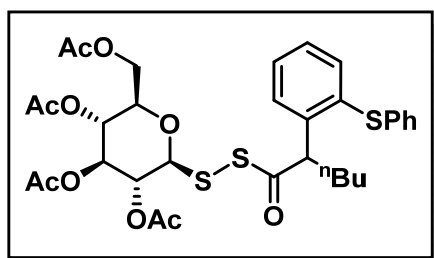

Yield: 41.5 mg (41%); time: 20 h; yellow liquid; TLC,  $R_f = 0.20$  (PE:EtOAc = 4:1);  $^1\text{H}$  NMR ( $\text{CDCl}_3$ , 400 MHz):  $\delta$  7.37 (d,  $J = 8.0$  Hz, 1H), 7.33-7.27 (m, 2H), 7.24-7.15 (m, 6H), 5.13-5.06 (m, 1H), 4.97-4.88 (m, 2H), 4.66-4.62 (m, 1H), 4.28 (dd,  $J = 28.0, 12.0$  Hz, 1H), 4.17-4.04 (m, 1H), 3.97-3.93 (m, 1H), 3.58-3.47 (m, 1H), 2.05 (d,  $J = 4.0$  Hz, 3H), 2.00 (d,  $J = 4.0$  Hz, 3H), 1.94-1.93 (d,  $J = 4.0$  Hz, 6H), 1.73-1.59 (m, 2H), 1.21-1.16 (m, 4H), 0.74 (t,  $J = 8.0$  Hz, 3H);  $^{13}\text{C}$  NMR ( $\text{CDCl}_3$ , 100 MHz):  $\delta$  196.4, 170.6, 170.1, 169.5, 169.3, 139.5, 136.5, 134.9, 134.8, 129.7, 129.2, 128.8, 128.7, 128.6, 126.7, 87.2, 87.0, 76.1, 73.7, 69.6, 67.8, 61.9, 55.6, 33.2, 29.3, 26.9, 22.4, 20.7, 20.5, 13.8; HRMS (ESI)  $m/z$  calcd. for  $\text{C}_{32}\text{H}_{38}\text{NaO}_{10}\text{S}_3$   $[\text{M}+\text{Na}]^+$ : 701.1519, found: 701.1518.

**(p-Tolyl) 2-(2-(phenylthio)phenyl)hexane(dithioperoxoate) (4e)**

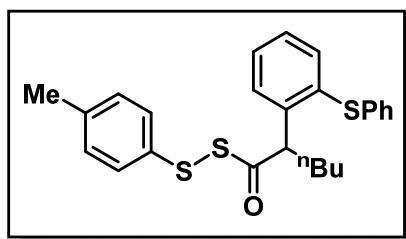

Yield: 39.3 mg (60%); time: 20 h; yellow liquid; TLC,  $R_f = 0.20$  (PE:EtOAc = 49:1);  $^1\text{H}$  NMR ( $\text{CDCl}_3$ , 400 MHz):  $\delta$  7.32 (m, 2H), 7.25-7.20 (m, 3H), 7.18-7.10 (m, 6H), 6.96 (d,  $J = 8.0$  Hz, 2H), 4.65 (t,  $J = 4.0$  Hz, 1H), 2.22 (s, 3H), 2.10-2.01 (m, 1H), 1.70-

1.60 (m, 1H), 1.22-1.00 (m, 4H), 0.72 (t,  $J = 4.0$  Hz, 3H);  $^{13}\text{C}$  NMR ( $\text{CDCl}_3$ , 100 MHz):  $\delta$  198.1, 139.7, 138.3, 136.5, 134.8, 134.7, 132.5, 130.7, 129.7, 129.7, 129.2, 128.7, 128.6, 128.4, 126.6, 55.3, 33.5, 29.5, 22.4, 21.1, 13.8; HRMS (ESI)  $m/z$  calcd. for  $\text{C}_{25}\text{H}_{26}\text{OS}_3$   $[\text{M}+\text{Na}]^+$ : 461.1038, found: 461.1032.

**(Naphthalen-2-yl) 2-(2-(phenylthio)phenyl)hexane(dithioperoxoate) (4f)**

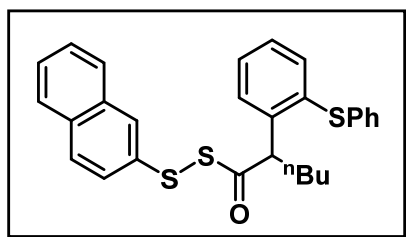

Yield: 47.5 mg (67%); time: 20 h; yellow liquid; TLC,  $R_f = 0.20$  (PE:EtOAc = 49:1);  $^1\text{H}$  NMR ( $\text{CDCl}_3$ , 400 MHz):  $\delta$  7.88 (d,  $J = 2.0$  Hz, 1H), 7.82 (t,  $J = 4.0$  Hz, 3H), 7.76-7.71 (m, 2H), 7.52-7.44 (m, 6H), 7.36 (t,  $J = 8.0$  Hz, 1H), 7.32-7.29 (m, 1H), 7.27-7.26 (m, 3H), 7.23-7.20 (m, 1H), 4.84 (t,  $J = 8.0$  Hz, 1H), 2.25-2.16 (m, 1H), 1.84-1.74 (m, 1H), 1.34-1.23 (m, 4H), 0.84 (t,  $J = 8.0$  Hz, 3H);  $^{13}\text{C}$  NMR ( $\text{CDCl}_3$ , 100 MHz):  $\delta$  197.7, 139.5, 136.4, 134.8, 134.7, 133.3, 133.0, 132.6, 129.7, 129.2, 128.8, 128.8, 128.7, 128.6, 128.5, 127.7, 127.5, 127.0, 126.6, 126.5, 55.4, 33.4, 29.5, 22.4, 13.8; HRMS (ESI)  $m/z$  calcd. for  $\text{C}_{28}\text{H}_{26}\text{OS}_3$   $[\text{M}+\text{H}]^+$ : 475.1219, found: 475.1216.

**Benzyl 2-(2-(phenylthio)phenyl)hexane(dithioperoxoate) (4g)**

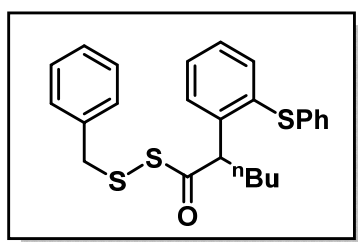

Yield: 39.9 mg (61%); time: 20 h; yellow liquid; TLC,  $R_f = 0.20$  (PE:EtOAc = 49:1);  $^1\text{H}$  NMR ( $\text{CDCl}_3$ , 400 MHz):  $\delta$  7.36 (d,  $J = 8.0$  Hz, 1H), 7.31-7.23 (m, 2H), 7.19-7.14 (m, 6H), 7.12-7.07 (m, 5H), 4.63 (t,  $J = 8.0$  Hz, 1H), 3.71 (dd,  $J = 17.2, 12.0$  Hz, 2H), 2.06-1.92 (m, 1H), 1.66-1.57 (m, 1H), 1.21-1.16 (m, 4H), 0.74 (t,  $J = 4.0$  Hz, 3H);  $^{13}\text{C}$  NMR ( $\text{CDCl}_3$ , 100 MHz):  $\delta$  198.4, 139.9, 136.6, 136.1, 134.9, 134.5, 129.6, 129.4,

129.2, 128.8, 128.5, 128.4, 128.3, 127.6, 126.5, 55.3, 42.4, 33.5, 29.4, 22.4, 13.8;  
HRMS (ESI)  $m/z$  calcd. for  $C_{25}H_{26}OS_3$   $[M+H]^+$ : 439.1219, found: 439.1226.

**Cyclohexyl 3,3-dimethyl-2-(2-(phenylthio)phenyl)butane(dithioperoxoate) (4h)**

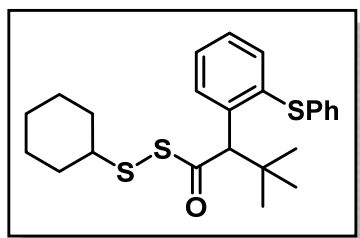

Yield: 45.6 mg (71%); time: 20 h; yellow liquid; TLC,  $R_f$  = 0.20 (PE:EtOAc = 49:1);  
 $^1H$  NMR ( $CDCl_3$ , 400 MHz):  $\delta$  7.61 (d,  $J$  = 8.0 Hz, 1H), 7.40 (dd,  $J$  = 7.6, 1.6 Hz, 1H),  
7.27-7.26 (m, 5H), 7.24-7.22 (m, 1H), 7.21-7.20 (m, 1H), 4.95 (s, 1H), 2.71-2.64 (m,  
2H), 1.90-1.84 (m, 2H), 1.29-1.17 (m, 6H), 1.08 (s, 9H);  $^{13}C$  NMR ( $CDCl_3$ , 100 MHz):  
 $\delta$  198.4, 136.9, 136.7, 136.5, 134.7, 130.1, 130.1, 129.1, 128.2, 127.4, 126.6, 63.3, 49.5,  
36.9, 32.4, 28.1, 25.9, 25.4; HRMS (ESI)  $m/z$  calcd. for  $C_{24}H_{30}OS_3$   $[M+Na]^+$ : 453.1351,  
found: 453.1345.

**Cyclohexyl 2-(2-(phenylthio)phenyl)-2-(triisopropylsilyl)ethane(dithioperoxoate) (4i)**

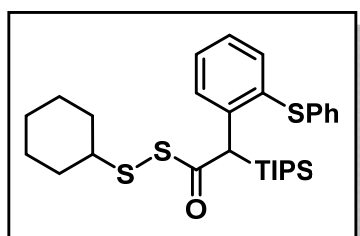

Yield: 31.6 mg (40%); time: 20 h; yellow liquid; TLC,  $R_f$  = 0.20 (PE:EtOAc = 49:1);  
 $^1H$  NMR ( $CDCl_3$ , 400 MHz):  $\delta$  7.77 (d,  $J$  = 8.0 Hz, 1H), 7.41 (d,  $J$  = 8.0 Hz, 1H), 7.32-  
7.26 (m, 3H), 7.24-7.21 (m, 2H), 7.18-7.15 (m, 2H), 5.12 (s, 1H), 2.45 (m, 1H), 1.90-  
1.72 (m, 6H), 1.29-1.17 (m, 5H), 1.08 (m, 21 H);  $^{13}C$  NMR ( $CDCl_3$ , 100 MHz):  $\delta$   
196.78, 138.24, 136.79, 135.07, 133.35, 131.68, 131.52, 130.99, 130.40, 129.60,  
129.34, 129.15, 129.11, 128.27, 127.20, 126.40, 49.14, 48.65, 32.56, 32.50, 25.93,  
25.46, 18.80, 18.70, 12.11.; HRMS (ESI)  $m/z$  calcd. for  $C_{29}H_{42}OS_3Si$   $[M+Na]^+$ :  
553.2059, found: 553.2047.

#### Cyclohexyl 2-phenyl-2-(2-(phenylthio)phenyl)ethane(dithioperoxoate) (4j)

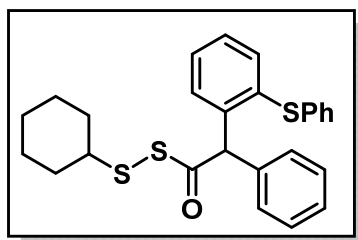

Yield: 45.1 mg (67%); time: 20 h; yellow oil; TLC,  $R_f$  = 0.20 (PE:EtOAc = 49:1);  $^1\text{H}$  NMR ( $\text{CDCl}_3$ , 400 MHz):  $\delta$  7.43 (dd,  $J$  = 7.6, 1.6 Hz, 1H), 7.34-7.27 (m, 6 H), 7.24-7.21 (m, 4H), 7.20-7.15 (m, 3H), 6.11 (s, 1H), 2.71-2.64 (m, 1H), 1.93-1.89 (m, 2H), 1.74-1.70 (m, 2H), 1.29-1.22 (m, 6H);  $^{13}\text{C}$  NMR ( $\text{CDCl}_3$ , 100 MHz):  $\delta$  198.3, 163.3, 140.0, 135.0, 130.1, 129.4, 129.2, 128.8, 128.7, 128.6, 127.6, 126.6, 119.6, 113.1, 60.6, 49.7, 32.6(32.5), 29.7, 25.9 (25.5); HRMS (ESI)  $m/z$  calcd. for  $\text{C}_{26}\text{H}_{26}\text{NaOS}_3$   $[\text{M}+\text{Na}]^+$ : 473.1038, found: 473.1030.

#### Cyclohexyl 2-(2-(benzylthio)phenyl)hexane(dithioperoxoate) (4k)

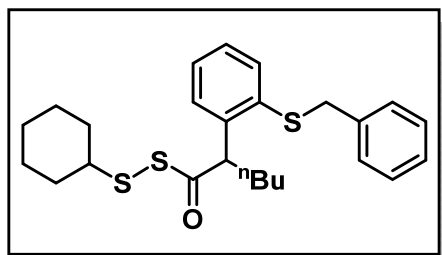

Yield: 51.3 mg (77%); time: 20 h; yellow liquid; TLC,  $R_f$  = 0.20 (PE:EtOAc = 49:1);  $^1\text{H}$  NMR ( $\text{CDCl}_3$ , 400 MHz):  $\delta$  7.39 (dd,  $J$  = 7.6, 1.6 Hz, 1H), 7.31-7.23 (m, 6 H), 7.22-7.18 (m, 2H), 4.76 (t,  $J$  = 7.2 Hz, 3H), 4.11 (s, 2H), 2.71-2.65 (m, 1H), 2.15-2.06 (m, 1H), 1.92-1.86 (m, 2H), 1.74-1.70 (m, 2H), 1.63-1.54 (m, 2H), 1.32-1.12 (m, 9H), 0.85 (t,  $J$  = 8.0 Hz, 3H);  $^{13}\text{C}$  NMR ( $\text{CDCl}_3$ , 100 MHz):  $\delta$  199.5, 139.3, 137.2, 135.6, 132.6, 128.9, 128.5, 128.0, 127.8, 127.6, 127.3, 55.2, 49.5, 40.5, 33.5, 32.4, 29.5, 25.9, 25.4, 22.5, 13.9; HRMS (ESI)  $m/z$  calcd. for  $\text{C}_{25}\text{H}_{32}\text{OS}_3$   $[\text{M}+\text{Na}]^+$ : 467.1507, found: 467.1500.

**Cyclohexyl 2-(5-methyl-2-(p-tolylthio)phenyl)hexane(dithioperoxoate) (4l)**

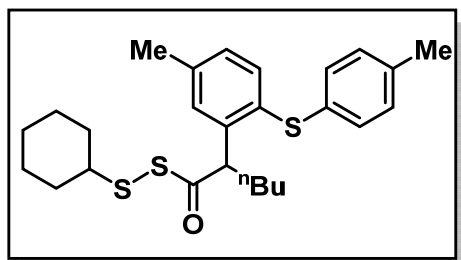

Yield: 44.5 mg (65%); time: 20 h; yellow liquid; TLC,  $R_f$  = 0.20 (PE:EtOAc = 49:1);  $^1\text{H}$  NMR ( $\text{CDCl}_3$ , 400 MHz):  $\delta$  7.31 (dd,  $J$  = 8.0 Hz, 1H), 7.17 (s, 1 H), 7.14-7.11 (m, 2H), 7.07-7.05 (m, 2H), 7.04-7.01 (m, 1H), 4.74 (t,  $J$  = 4.0 Hz, 1H), 2.71-2.63 (m, 1H), 2.31 (d,  $J$  = 8.0 Hz, 6H), 2.14-2.05 (m, 1H), 1.92-1.86 (m, 1H), 1.74-1.56 (m, 4H), 1.26-1.23 (m, 9H), 0.81 (t,  $J$  = 6.8 Hz, 3H);  $^{13}\text{C}$  NMR ( $\text{CDCl}_3$ , 100 MHz):  $\delta$  199.7, 139.9, 138.8, 136.4, 134.8, 133.5, 131.4, 129.9, 129.7, 129.1, 128.9, 55.2, 49.5, 33.7, 32.5, 29.6, 26.0, 25.4, 22.5, 21.2, 21.0, 13.8; HRMS (ESI)  $m/z$  calcd. for  $\text{C}_{26}\text{H}_{34}\text{OS}_3$   $[\text{M}+\text{Na}]^+$ : 481.1664, found: 481.1655.

**Cyclohexyl 2-(dibenzo[b,d]thiophen-4-yl)hexane(dithioperoxoate) (4m)**

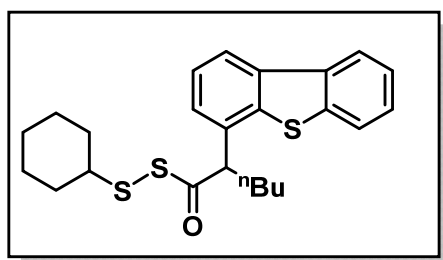

Yield: 48.7 mg (76%); time: 20 h; yellow liquid; TLC,  $R_f$  = 0.20 (PE:EtOAc = 49:1);  $^1\text{H}$  NMR ( $\text{CDCl}_3$ , 400 MHz):  $\delta$  8.17-8.15 (m, 1H), 8.10 (dd,  $J$  = 7.6, 1.6 Hz, 1H), 7.90-7.87 (m, 1H), 7.50-7.45 (m, 4H), 4.24 (t,  $J$  = 4.0 Hz, 1H), 2.68-2.61 (m, 1H), 2.33-2.23 (m, 1H), 2.10-2.01 (m, 1H), 1.89-1.80 (m, 2H), 1.72-1.64 (m, 2H), 1.57-1.49 (m, 3H), 1.43-1.30 (m, 3H), 1.28-1.08 (m, 4H), 0.86 (t,  $J$  = 8.0 Hz, 3H);  $^{13}\text{C}$  NMR ( $\text{CDCl}_3$ , 100 MHz):  $\delta$  198.9, 139.9, 138.8, 136.1, 136.0, 132.3, 127.0, 125.5, 125.2, 124.6, 122.8, 121.8, 120.9, 57.9, 49.6, 32.6, 32.4, 29.5, 25.8, 25.4, 22.5, 13.8; HRMS (ESI)  $m/z$  calcd. for  $\text{C}_{24}\text{H}_{28}\text{OS}_3$   $[\text{M}+\text{Na}]^+$ : 451.1194, found: 451.1193.



### Cyclohexyl 2-(2-(ethylthio)phenyl)hexane(dithioperoxoate) (4n)

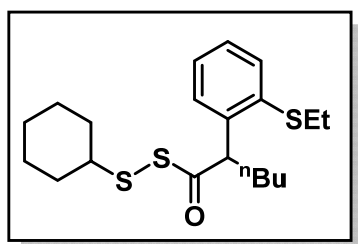

Yield: 26 mg (44%); time: 20 h; yellow liquid; TLC,  $R_f$  = 0.20 (PE:EtOAc = 49:1);  $^1\text{H}$  NMR ( $\text{CDCl}_3$ , 400 MHz):  $\delta$  7.43-7.41 (m, 1H), 7.32-7.29 (m, 1H), 7.25-7.17 (m, 2H), 4.74 (t,  $J$  = 8.0 Hz, 1H), 2.96 (q,  $J$  = 8.0 Hz, 2H), 2.79-2.65 (m, 2H), 2.20-2.10 (m, 1H), 2.00-1.96 (m, 1H), 1.92-1.87 (m, 2H), 1.82-1.66 (m, 5H), 1.34-1.30 (m, 3H), 1.27-1.19 (m, 6H), 0.86 (t,  $J$  = 8.0 Hz, 3H);  $^{13}\text{C}$  NMR ( $\text{CDCl}_3$ , 100 MHz):  $\delta$  199.6, 138.4, 136.3, 130.7, 128.0, 127.9, 126.8, 55.0, 49.5, 33.4, 32.4, 29.5, 29.0, 25.9, 25.5, 22.5, 14.4, 13.9; HRMS (ESI)  $m/z$  calcd. for  $\text{C}_{20}\text{H}_{30}\text{OS}_3$   $[\text{M}+\text{Na}]^+$ : 383.1532, found: 383.1526.

### Cyclohexyl 2-(2-(methylthio)phenyl)-2-phenylethane(dithioperoxoate) (4o)

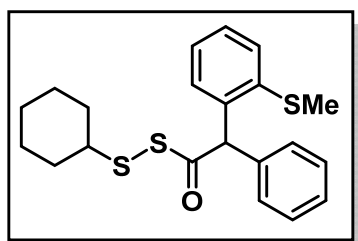

Yield: 31.4 mg (54%); time: 20 h; yellow liquid; TLC,  $R_f$  = 0.20 (PE:EtOAc = 49:1);  $^1\text{H}$  NMR ( $\text{CDCl}_3$ , 400 MHz):  $\delta$  7.37-7.27 (m, 7H), 7.24-7.21 (m, 1H), 7.17-7.13 (m, 1H), 5.99 (s, 1H), 2.74-2.67 (m, 1H), 2.45 (s, 3H), 1.97-1.92 (m, 2H), 1.77-1.72 (m, 2H), 1.35-1.14 (m, 6H);  $^{13}\text{C}$  NMR ( $\text{CDCl}_3$ , 100 MHz):  $\delta$  198.5, 138.0, 136.8, 136.5, 129.3, 129.1, 128.7, 128.3, 127.8, 127.7, 125.7, 60.1, 49.6, 32.5, 25.9, 25.5, 17.1; HRMS (ESI)  $m/z$  calcd. for  $\text{C}_{21}\text{H}_{24}\text{OS}_3$   $[\text{M}+\text{Na}]^+$ : 411.0881, found: 411.0877

### Cyclohexyl 2-(2-((trifluoromethyl)thio)phenyl)hexane(dithioperoxoate) (4p)

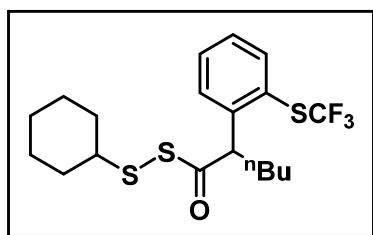

Yield: 25.2 mg (40%); time: 20 h; yellow liquid; TLC,  $R_f$ =0.20 (PE:EtOAc = 49:1);  $^1\text{H}$  NMR ( $\text{CDCl}_3$ , 400 MHz):  $\delta$  7.75 (d, 1H), 7.53-7.47 (m, 2H), 7.36-7.31 (m, 1H), 4.86 (t,  $J$  = 8.0 Hz, 1H), 2.72-2.65 (m, 1H), 2.25-2.16 (m, 1H), 2.02-1.83 (m, 4H), 1.79-1.70 (m, 2H), 1.25-1.20 (m, 9H), 0.87 (t,  $J$  = 4.0 Hz, 3H);  $^{13}\text{C}$  NMR ( $\text{CDCl}_3$ , 100 MHz):  $\delta$  199.2, 143.3, 138.2, 131.9, 129.3(q,  $J$  = 309 Hz), 128.6 (d,  $J$  = 58 Hz), 124.28, 55.5, 49.6, 42.4, 33.9, 32.5, 31.1, 29.7, 25.9, 25.2, 22.5, 13.8;  $^{19}\text{F}$  (376 MHz,  $\text{CDCl}_3$ )  $\delta$  -42.1. HRMS (ESI)  $m/z$  calcd. for  $\text{C}_{19}\text{H}_{26}\text{F}_3\text{OS}_3$   $[\text{M}+\text{H}]^+$ : 423.1092, found: 423.1094.

**5-(((3*s*,5*s*,7*s*)-Adamantan-1-yl)disulfanyl)-1-benzyl-4-butyl-1*H*-1,2,3-triazole (6)**

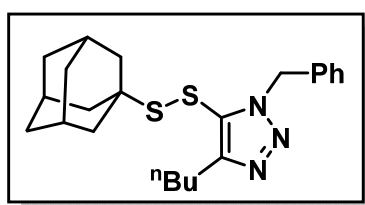

Yield: 25.4 mg (70%); time: 12 h; light yellow solid; TLC,  $R_f$  = 0.30 (PE:EtOAc = 9:1);  $^1\text{H}$  NMR ( $\text{CDCl}_3$ , 400 MHz):  $\delta$  7.35-7.26 (m, 5H), 5.67 (s, 2H), 2.78 (t,  $J$  = 7.6 Hz, 2H), 2.05 (s, 3H), 1.76-1.59 (m, 14H), 1.40 (q,  $J$  = 7.6 Hz, 2H), 0.94 (t,  $J$  = 7.2 Hz, 3H);  $^{13}\text{C}$  NMR ( $\text{CDCl}_3$ , 100 MHz):  $\delta$  150.6, 135.0, 128.7, 128.1, 128.0, 127.9, 52.4, 50.8, 42.4, 35.9, 31.1, 29.7, 25.6, 22.6, 13.9. HRMS (ESI)  $m/z$  calcd. for  $\text{C}_{23}\text{H}_{32}\text{N}_3\text{S}_2$   $[\text{M}+\text{H}]^+$ : 414.2032, found: 414.2049.

**2-(2-(Phenylthio)phenyl)hexanoic acid (7)**

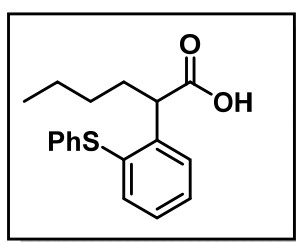

Yield: 34.5 mg (77%); time: 2 h; light yellow liquid; TLC,  $R_f$ =0.20 (PE:EtOAc = 3:1);  $^1\text{H}$  NMR ( $\text{CDCl}_3$ , 400 MHz):  $\delta$  7.45-7.41 (m, 2H), 7.32 (t,  $J$  = 8.0 Hz, 1H), 7.26-7.15 (m, 6H), 4.41 (t,  $J$  = 8.0 Hz, 1H), 2.08-2.00 (m, 1H), 1.74-1.64 (m, 1H), 1.31-1.08 (m, 5H), 0.81 (t,  $J$  = 8.0 Hz, 3H);  $^{13}\text{C}$  NMR ( $\text{CDCl}_3$ , 100 MHz):  $\delta$  179.9, 141.2, 136.8, 134.8, 134.1, 129.4, 129.0, 128.7, 128.1, 128.0, 126.4, 47.7, 32.9, 29.6, 22.4, 13.8; HRMS (ESI)  $m/z$  calcd. for  $\text{C}_{18}\text{H}_{19}\text{O}_2\text{S}$   $[\text{M}-\text{H}]^+$ : 299.1111, found: 299.1113.

## 2-(2-(Phenylthio)phenyl)hexanamide (8)

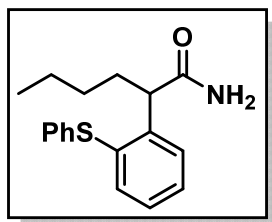

Yield: 33.1 mg (74%); time: 2 h; light yellow solid; TLC,  $R_f$ =0.20 (PE:EtOAc = 4:1);  $^1\text{H}$  NMR ( $\text{CDCl}_3$ , 400 MHz):  $\delta$  7.49 (d,  $J$  = 8.0 Hz, 1H), 7.39 (d,  $J$  = 8.0 Hz, 1H), 7.29 (t,  $J$  = 8.0 Hz, 1H), 7.22-7.09 (m, 6H), 5.29 (d,  $J$  = 76.0 Hz, 2H), 4.06 (t,  $J$  = 8.0 Hz, 1H), 2.07-1.98 (m, 1H), 1.62-1.53 (m, 1H), 1.20-1.12 (m, 3H), 1.06-0.94 (m, 1H), 0.74 (t,  $J$  = 8.0 Hz, 3H);  $^{13}\text{C}$  NMR ( $\text{CDCl}_3$ , 100 MHz):  $\delta$  175.5, 142.7, 137.0, 135.1, 132.7, 129.4, 129.3, 129.0, 128.3, 127.9, 126.5, 48.1, 32.8, 29.7, 22.5, 13.9; HRMS (ESI)  $m/z$  calcd. for  $\text{C}_{18}\text{H}_{21}\text{NOS}$   $[\text{M}+\text{Na}]^+$ : 322.1236, found: 322.1234.

## 5. Possible mechanism for S-S bond formation

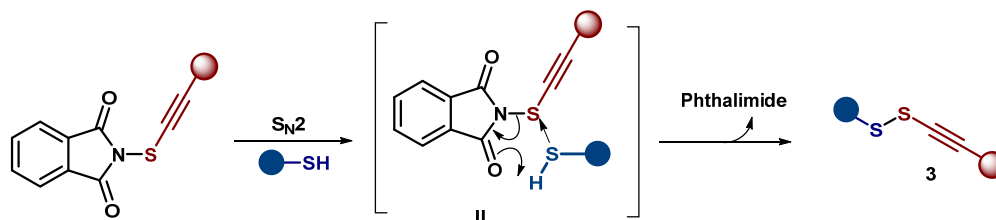

## 6. Copies of NMR spectra

3a

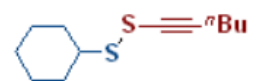

<sup>1</sup>H NMR 400 MHz CDCl<sub>3</sub>

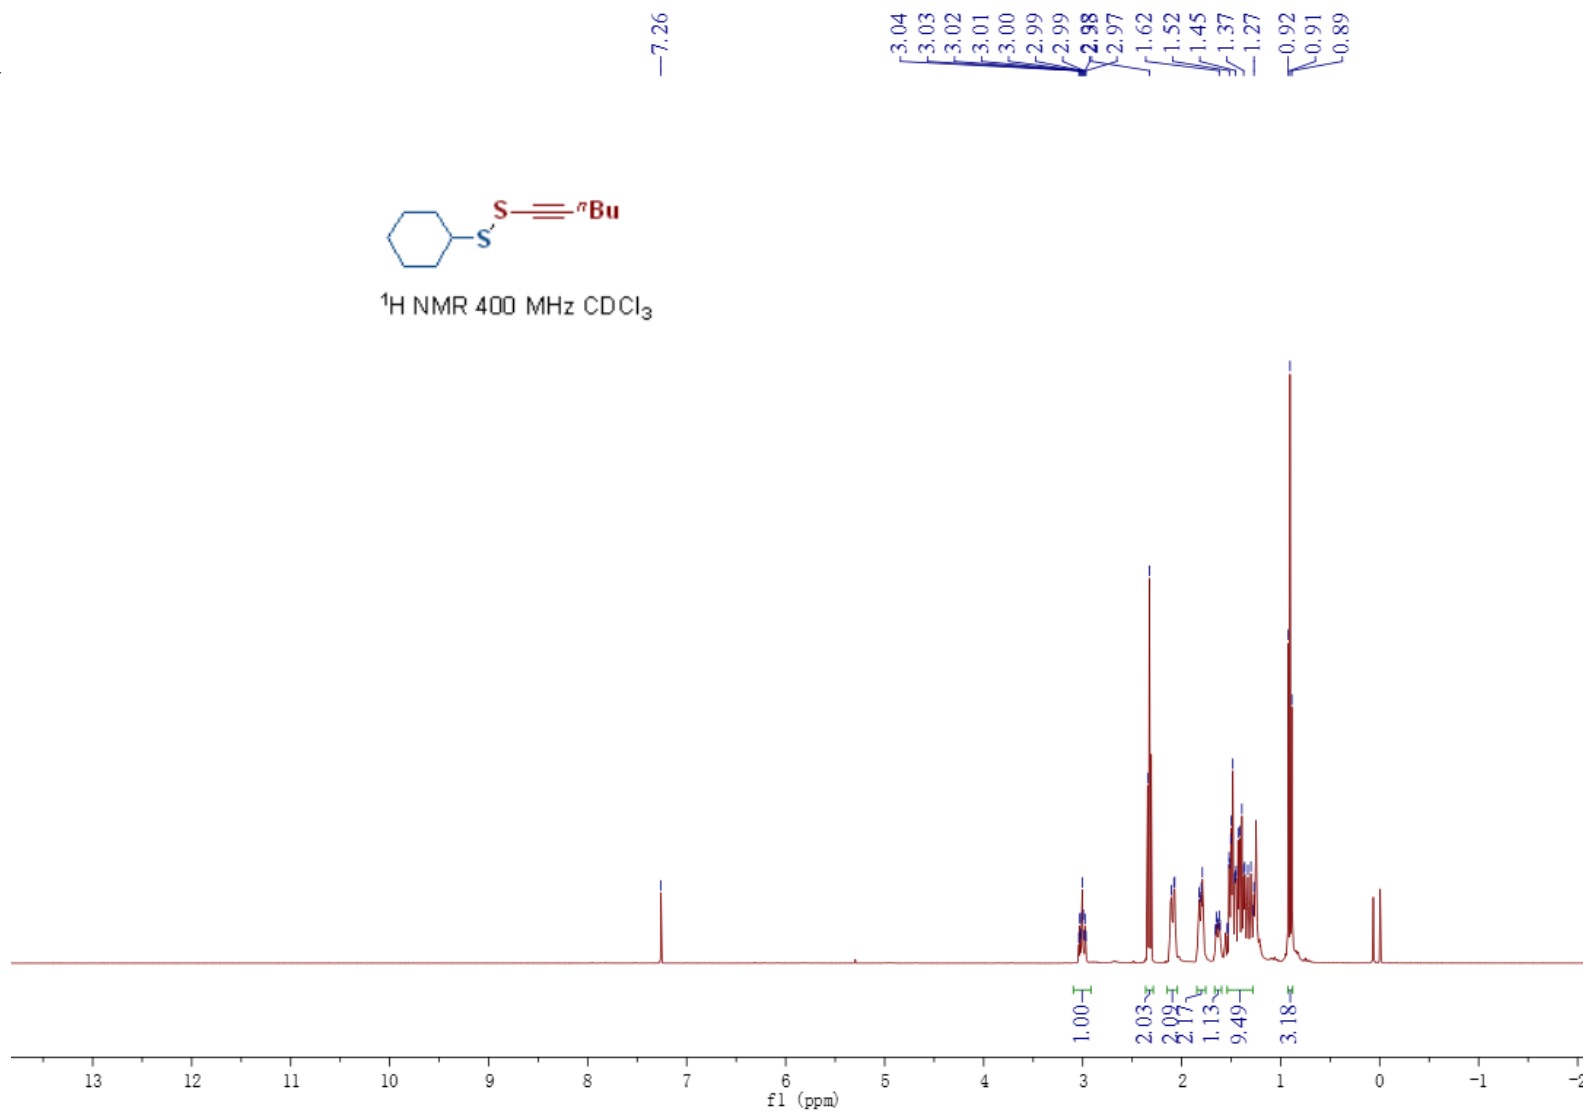

Copies of NMR spectra

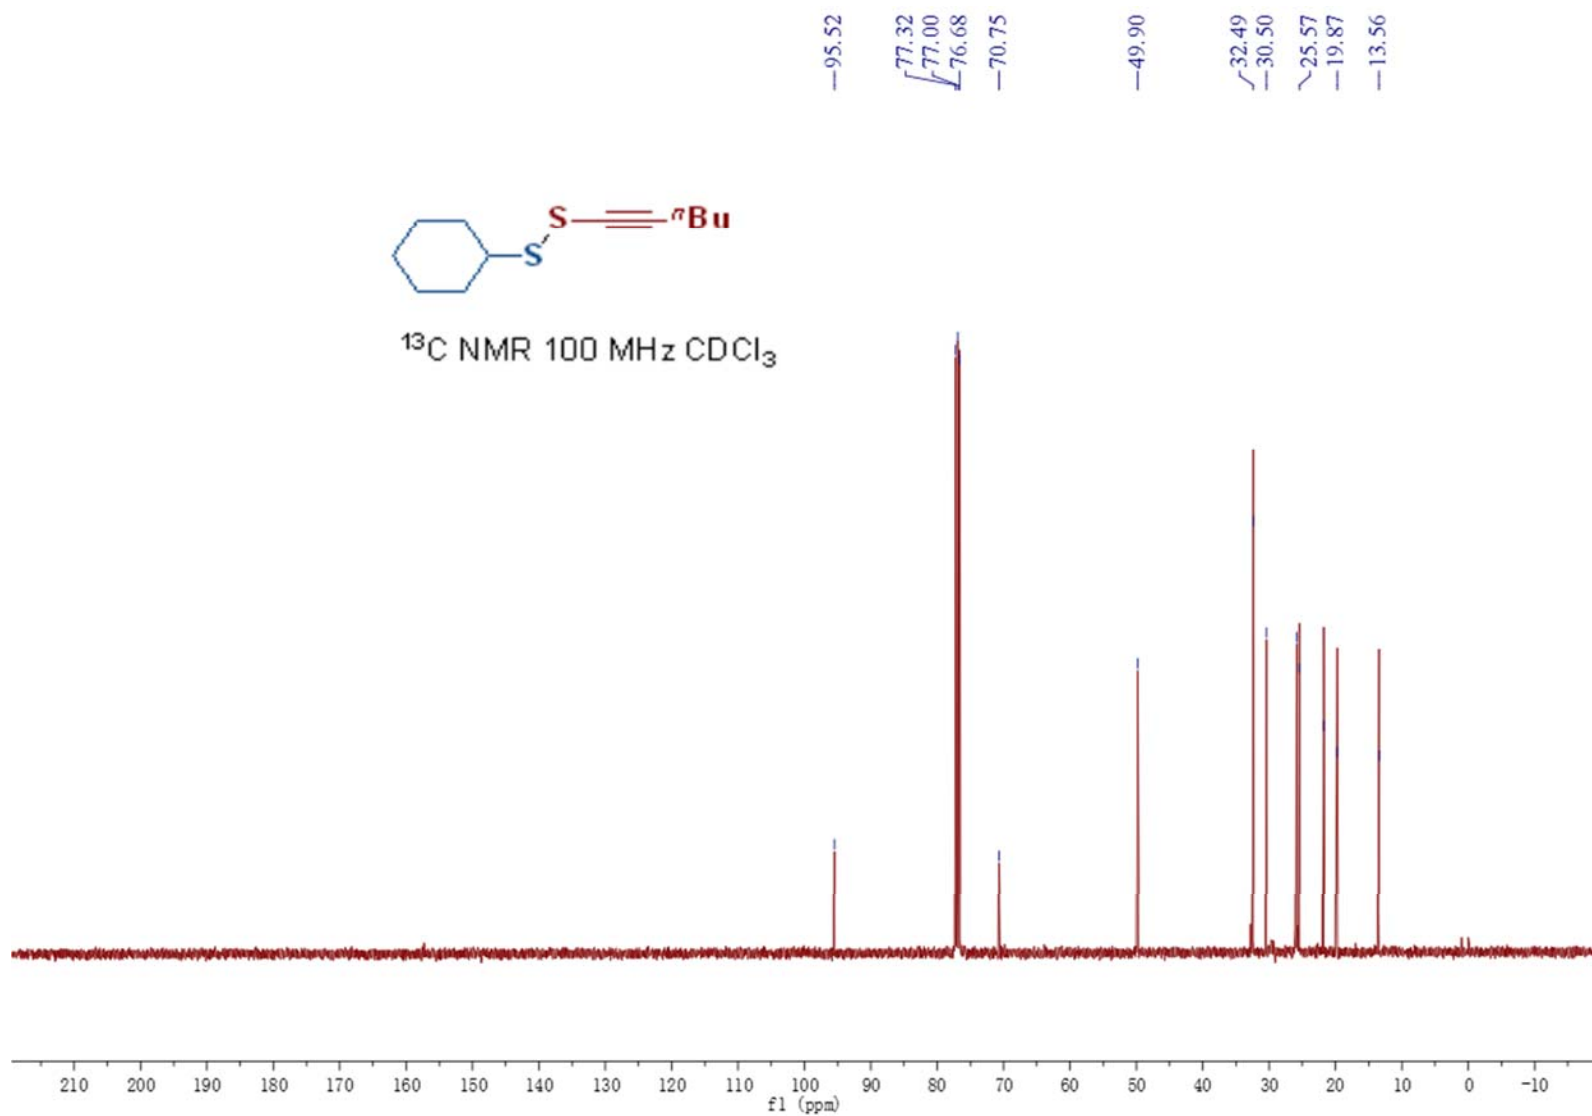

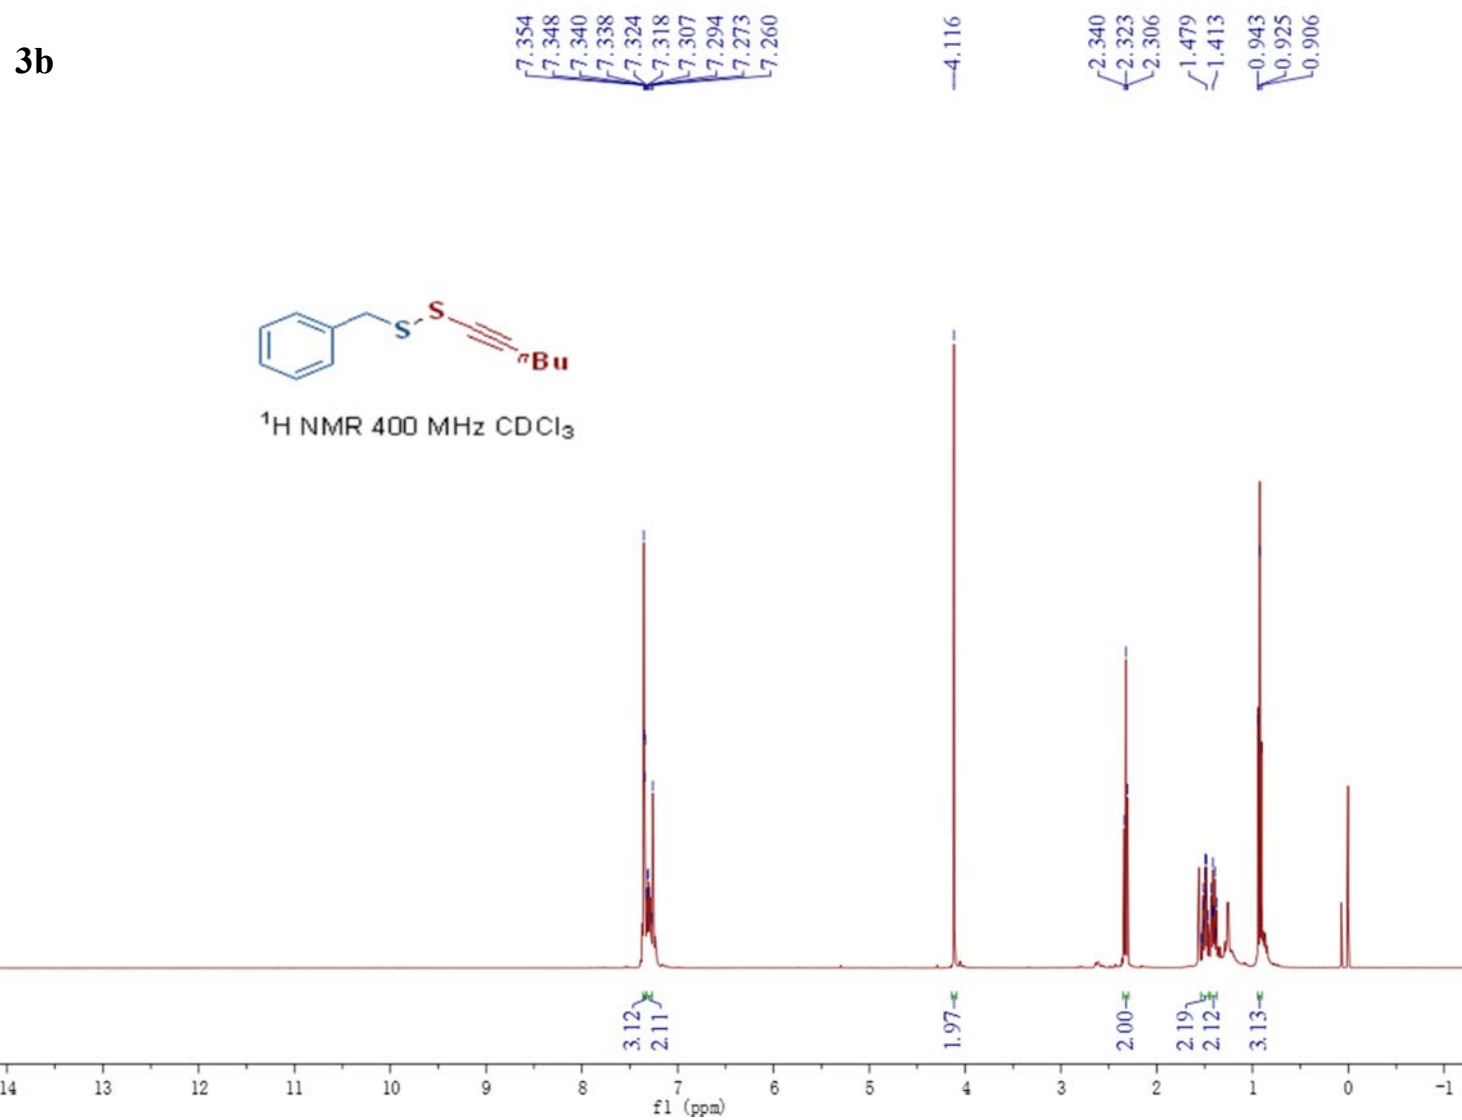

Copies of NMR spectra

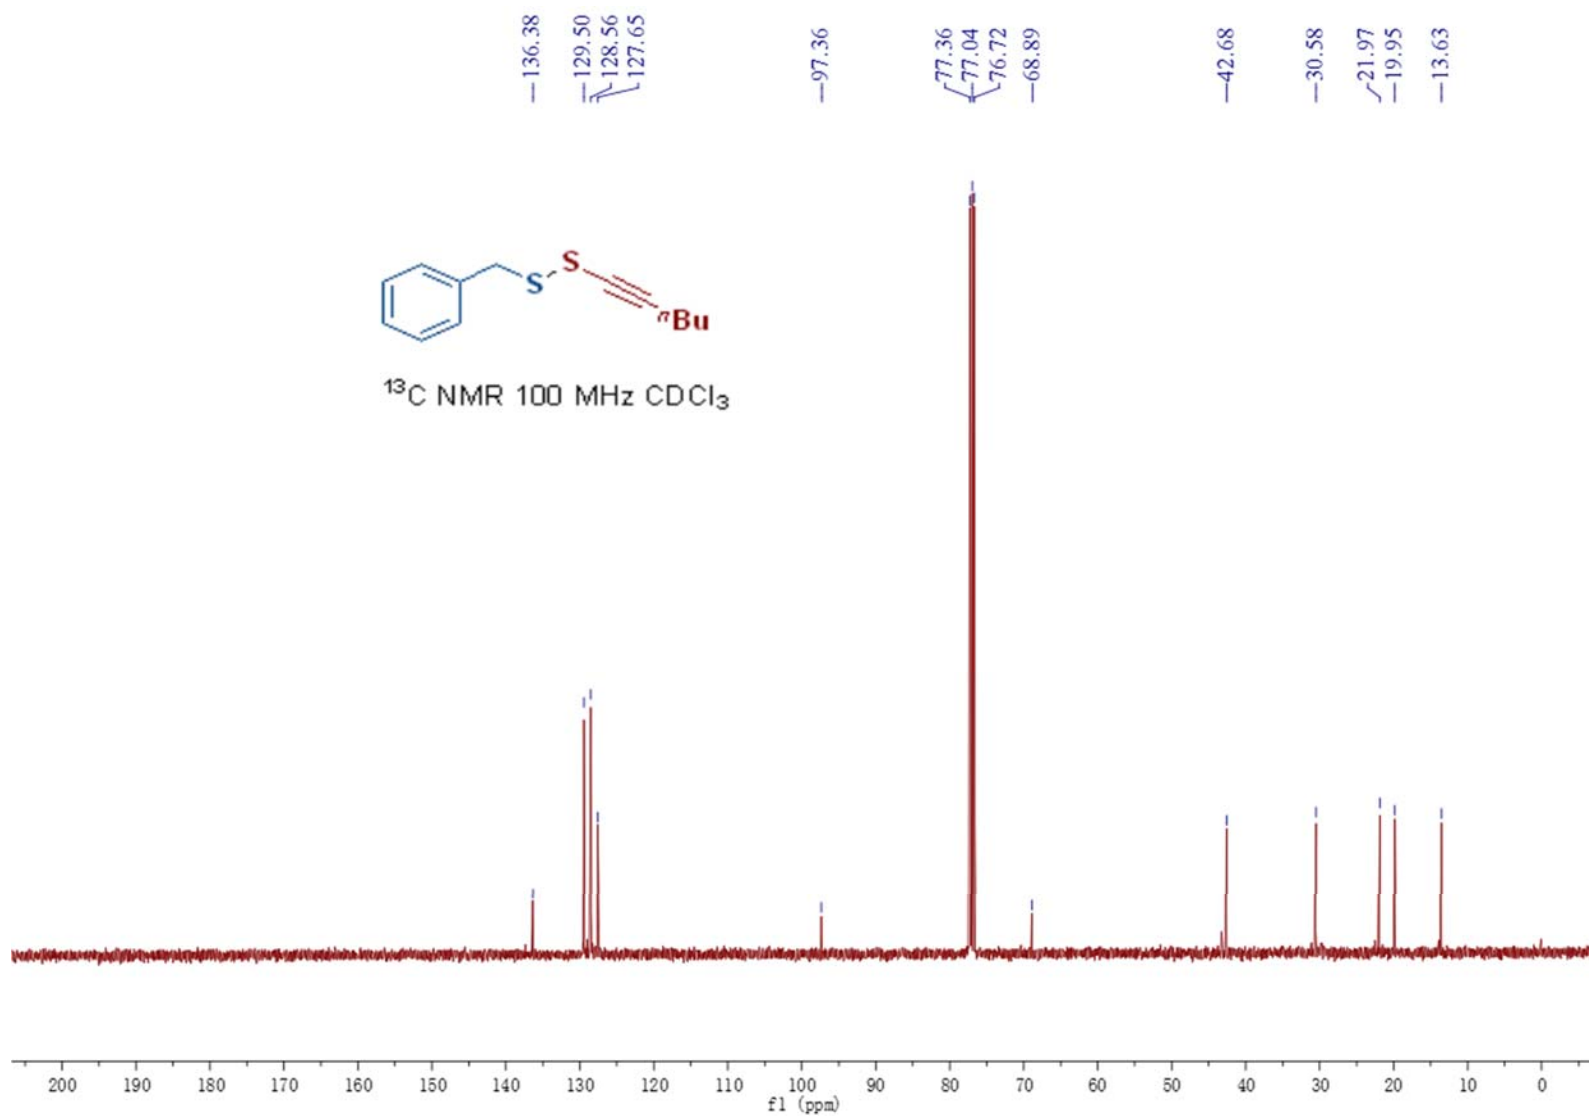

3c

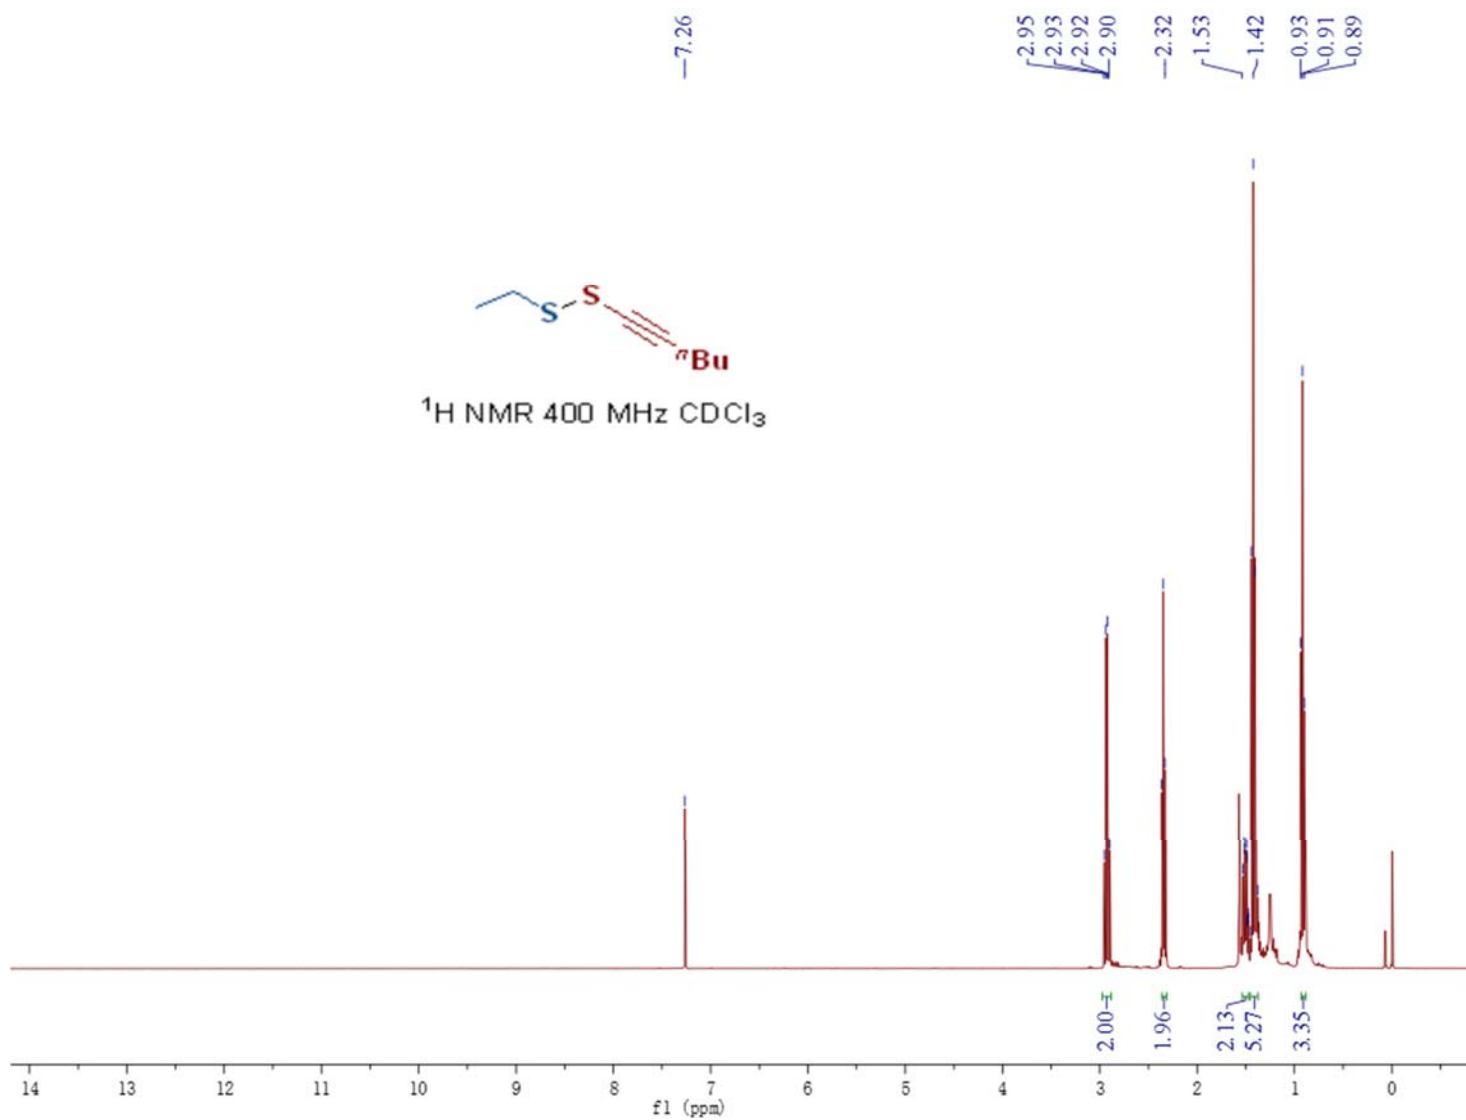



Copies of NMR spectra

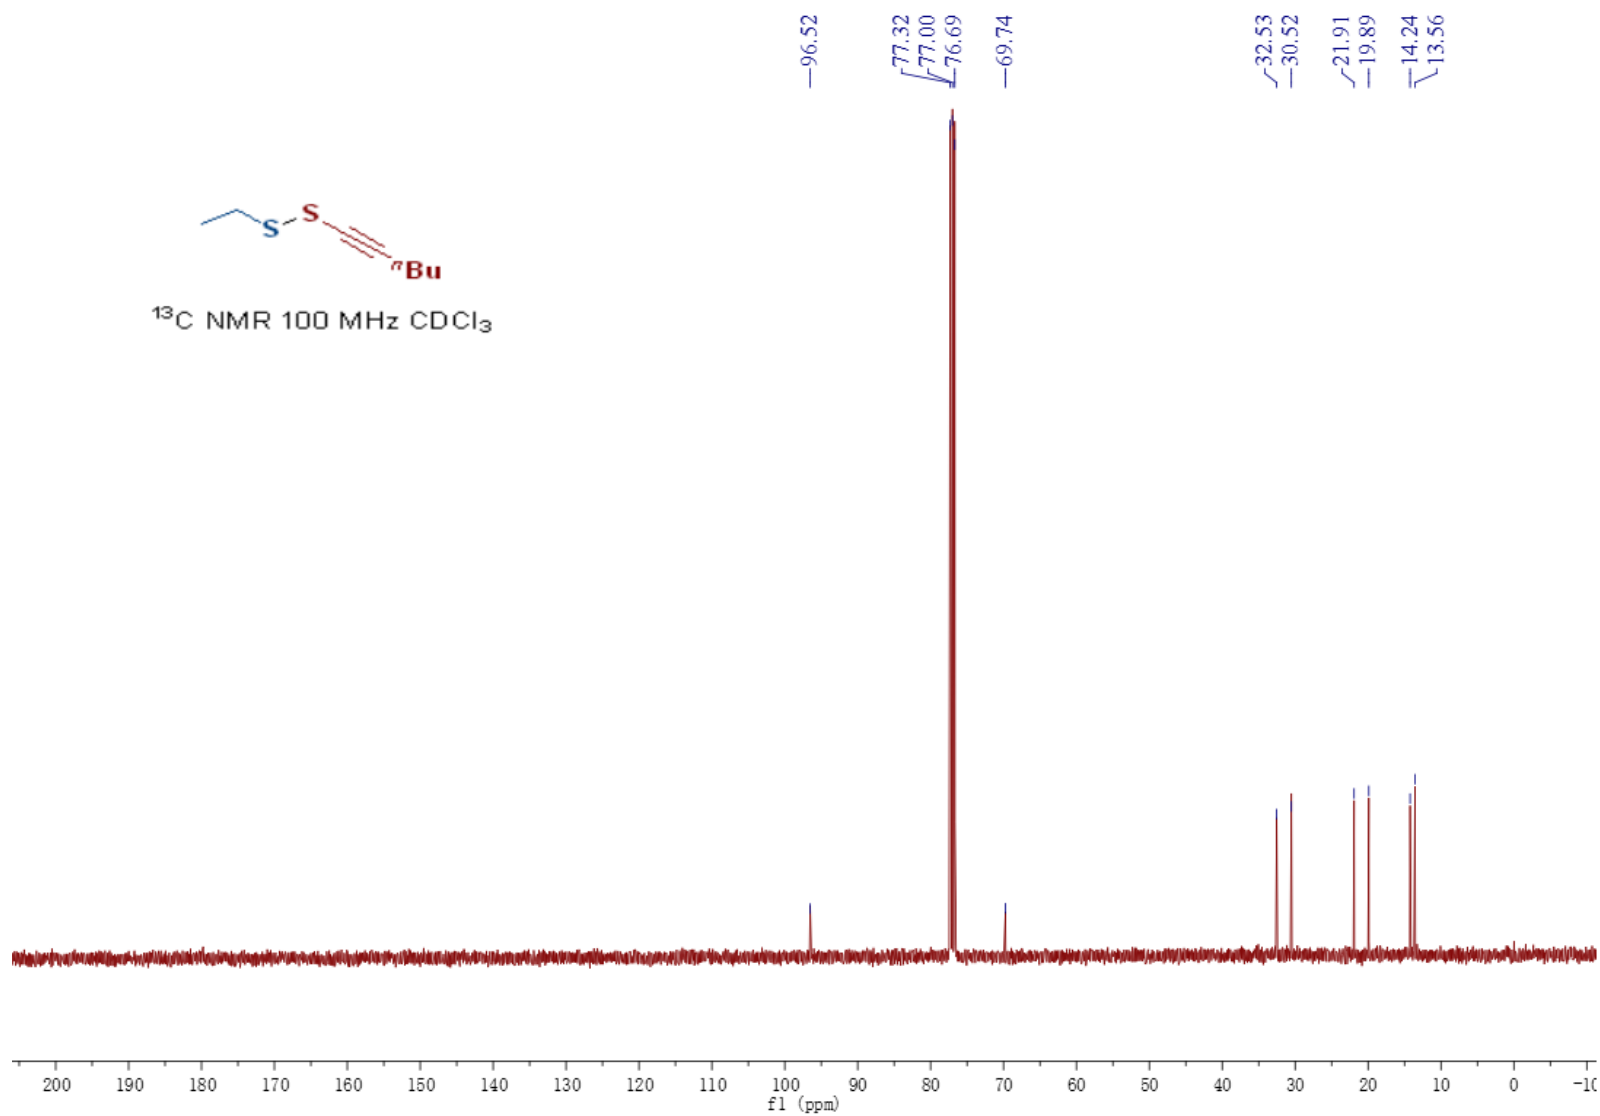

3d

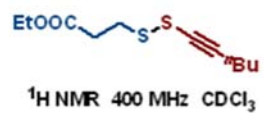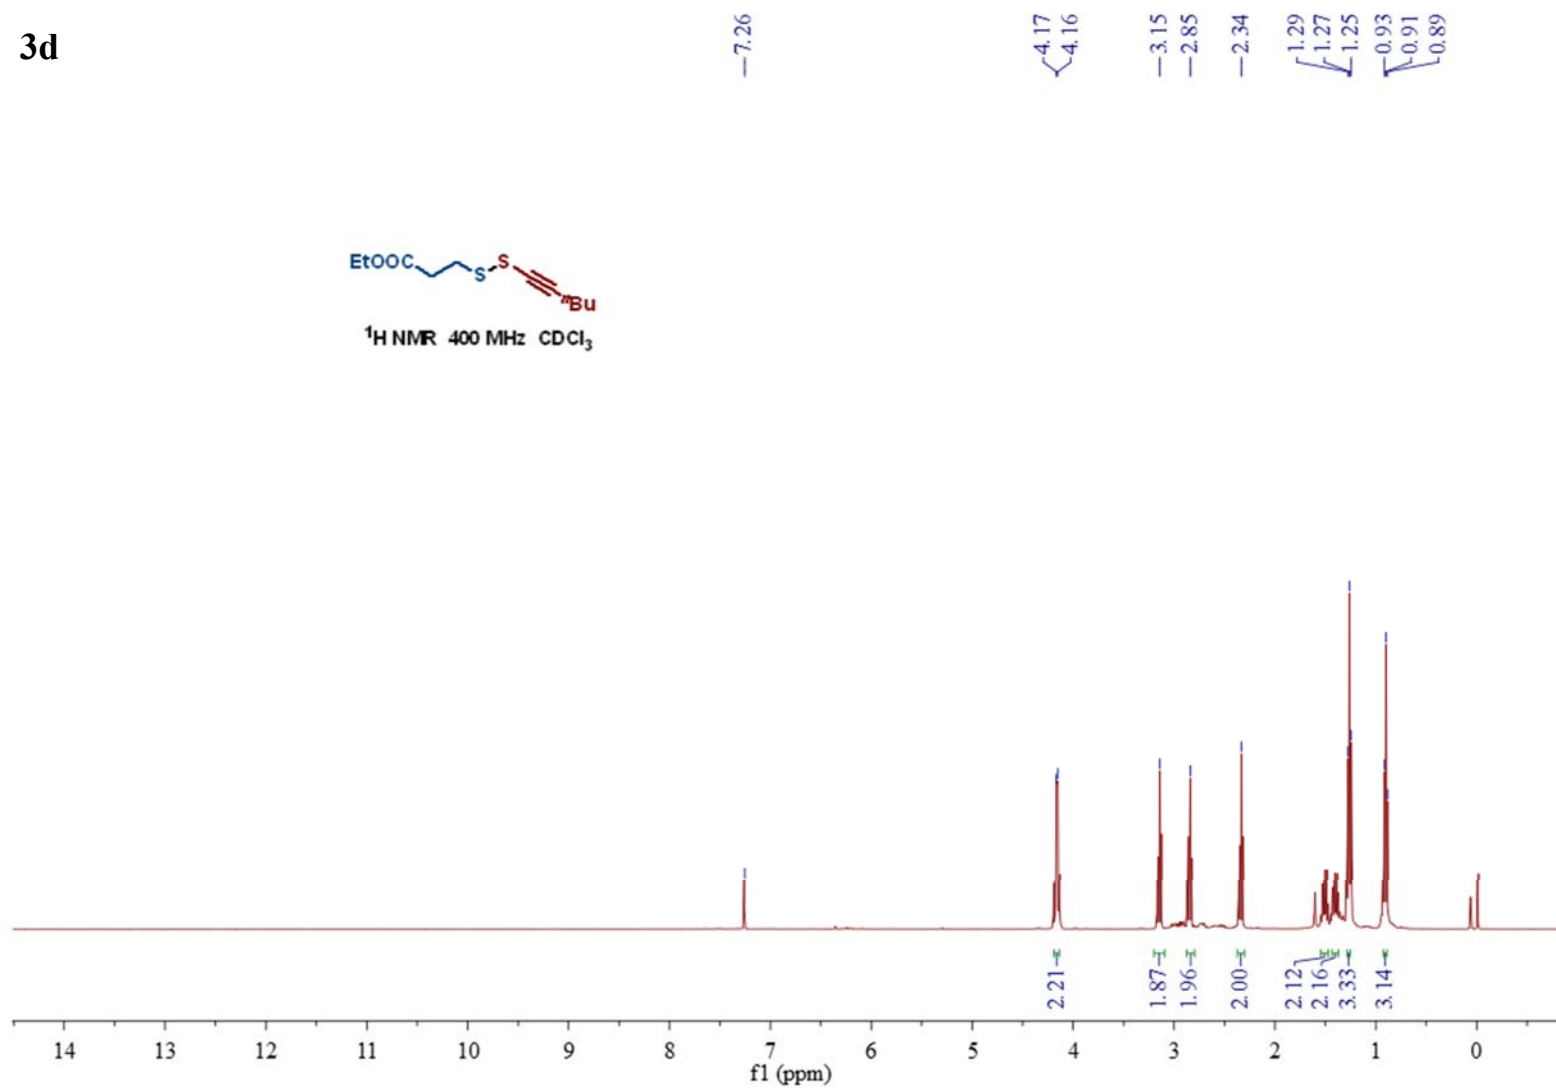

Copies of NMR spectra

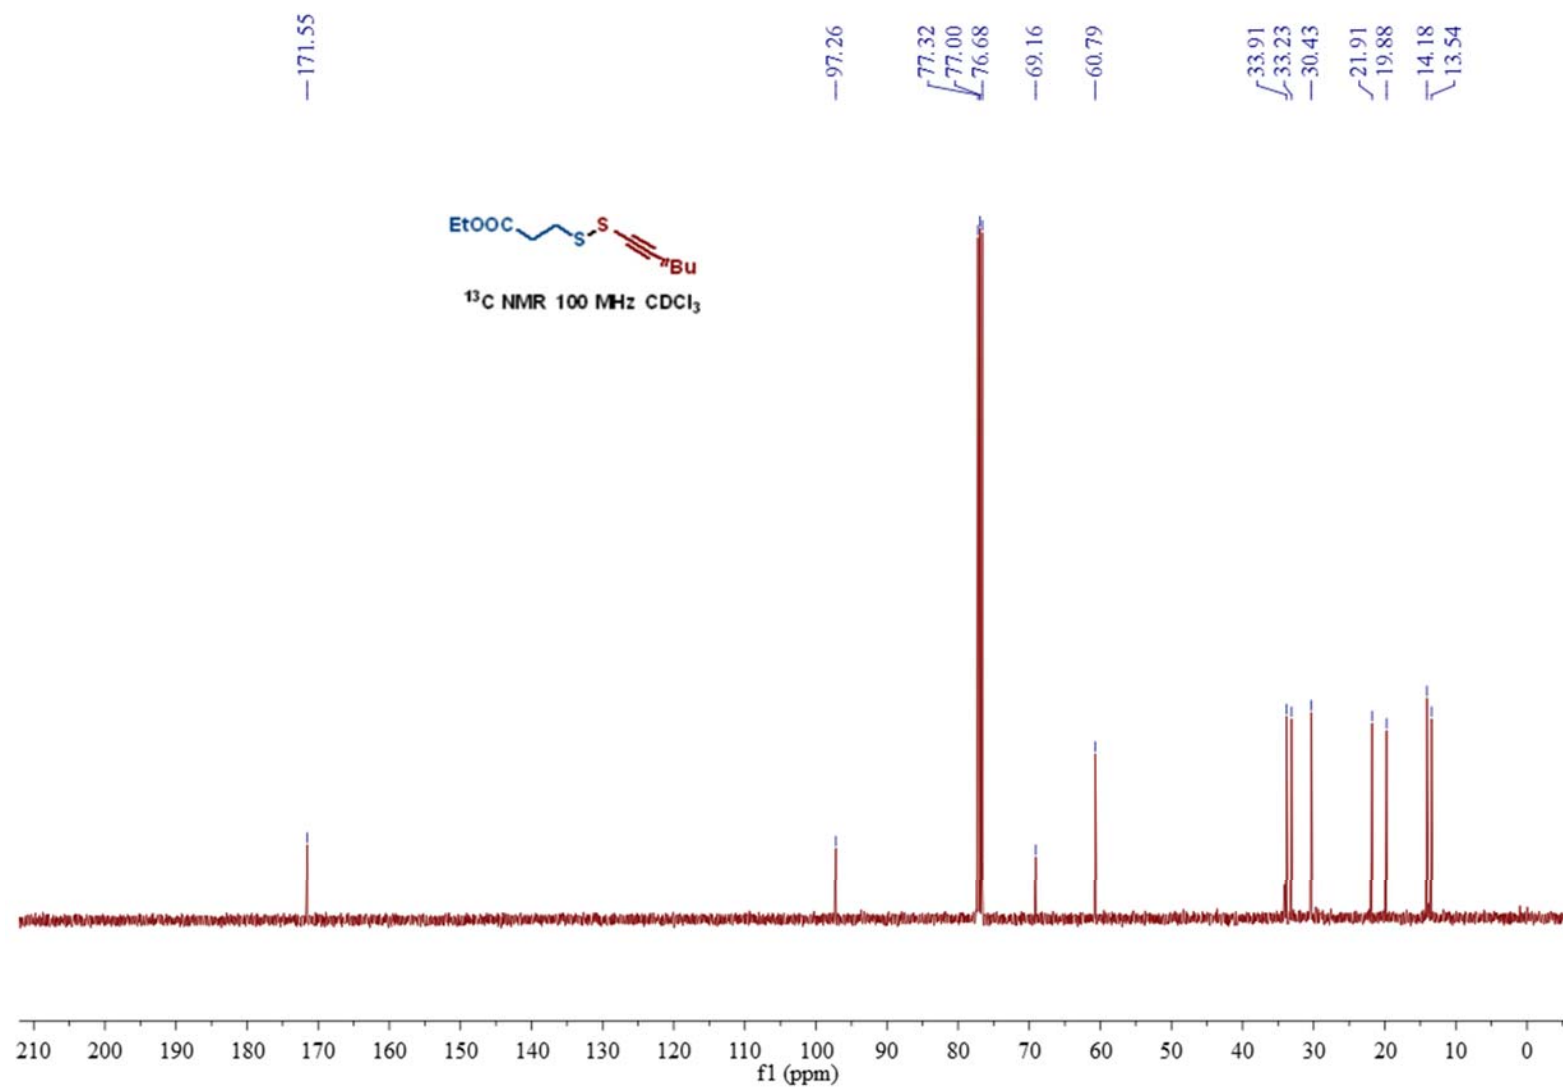

3e

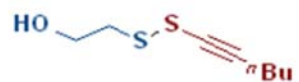

<sup>1</sup>H NMR 400 MHz CDCl<sub>3</sub>

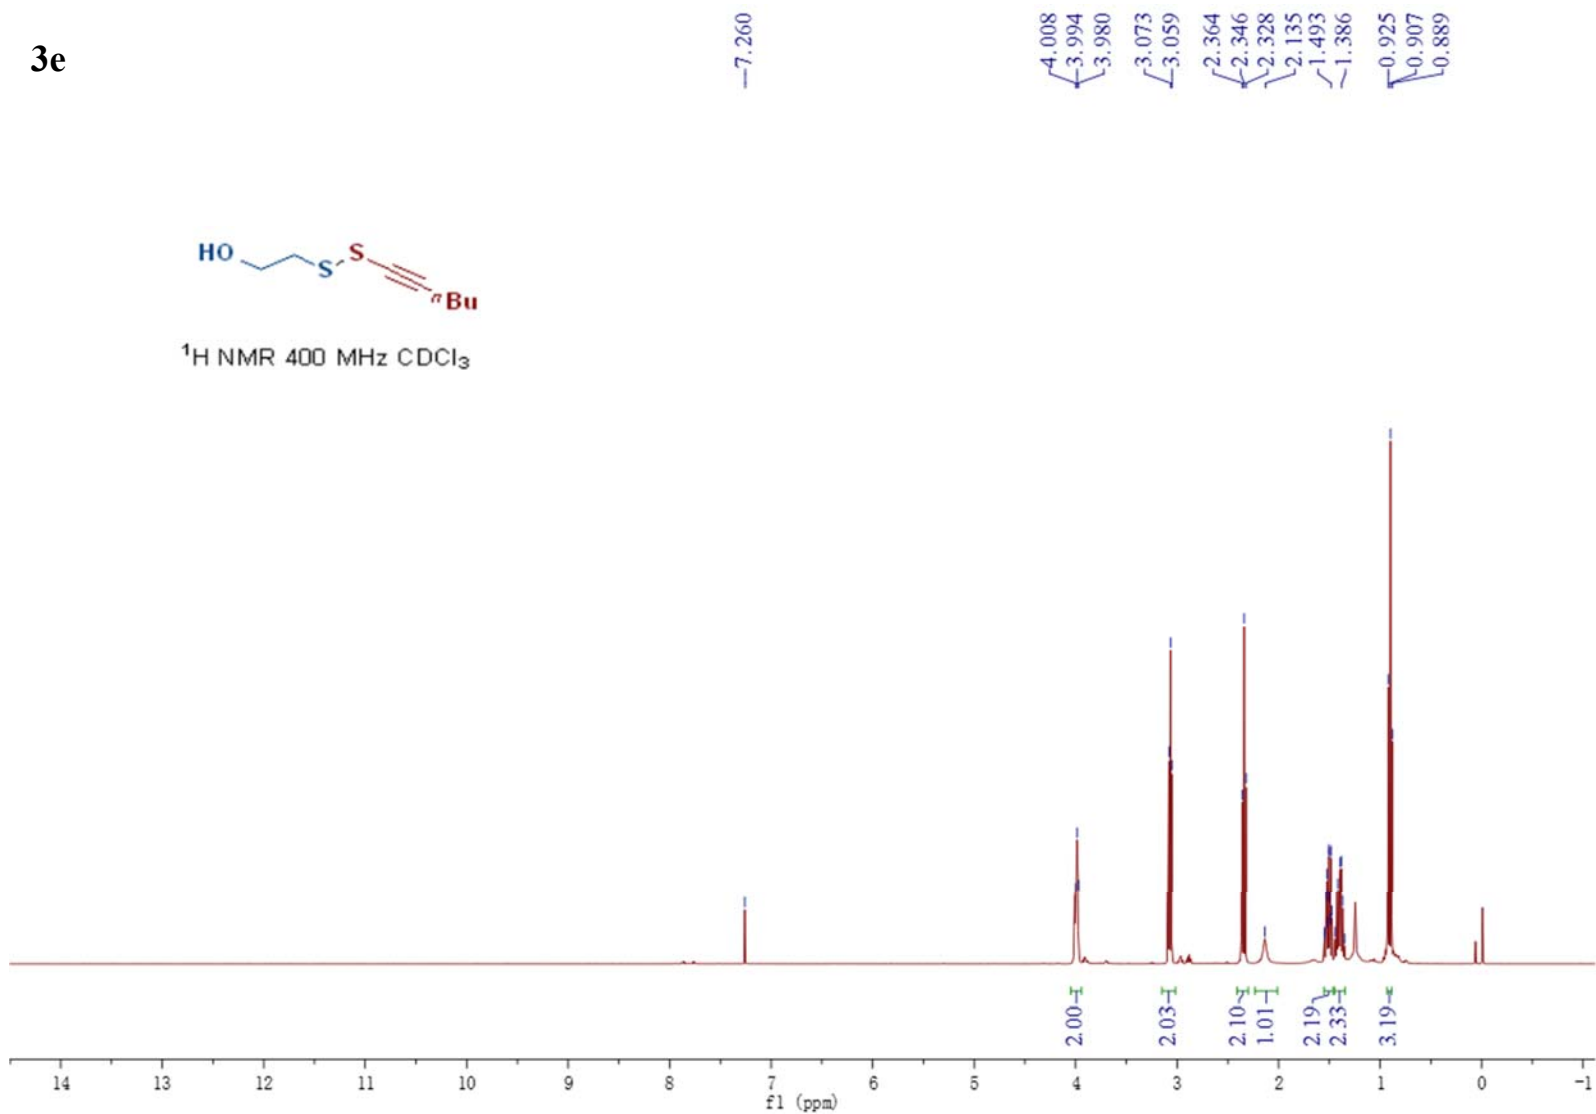

Copies of NMR spectra

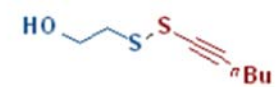

$^{13}\text{C}$  NMR 100 MHz  $\text{CDCl}_3$

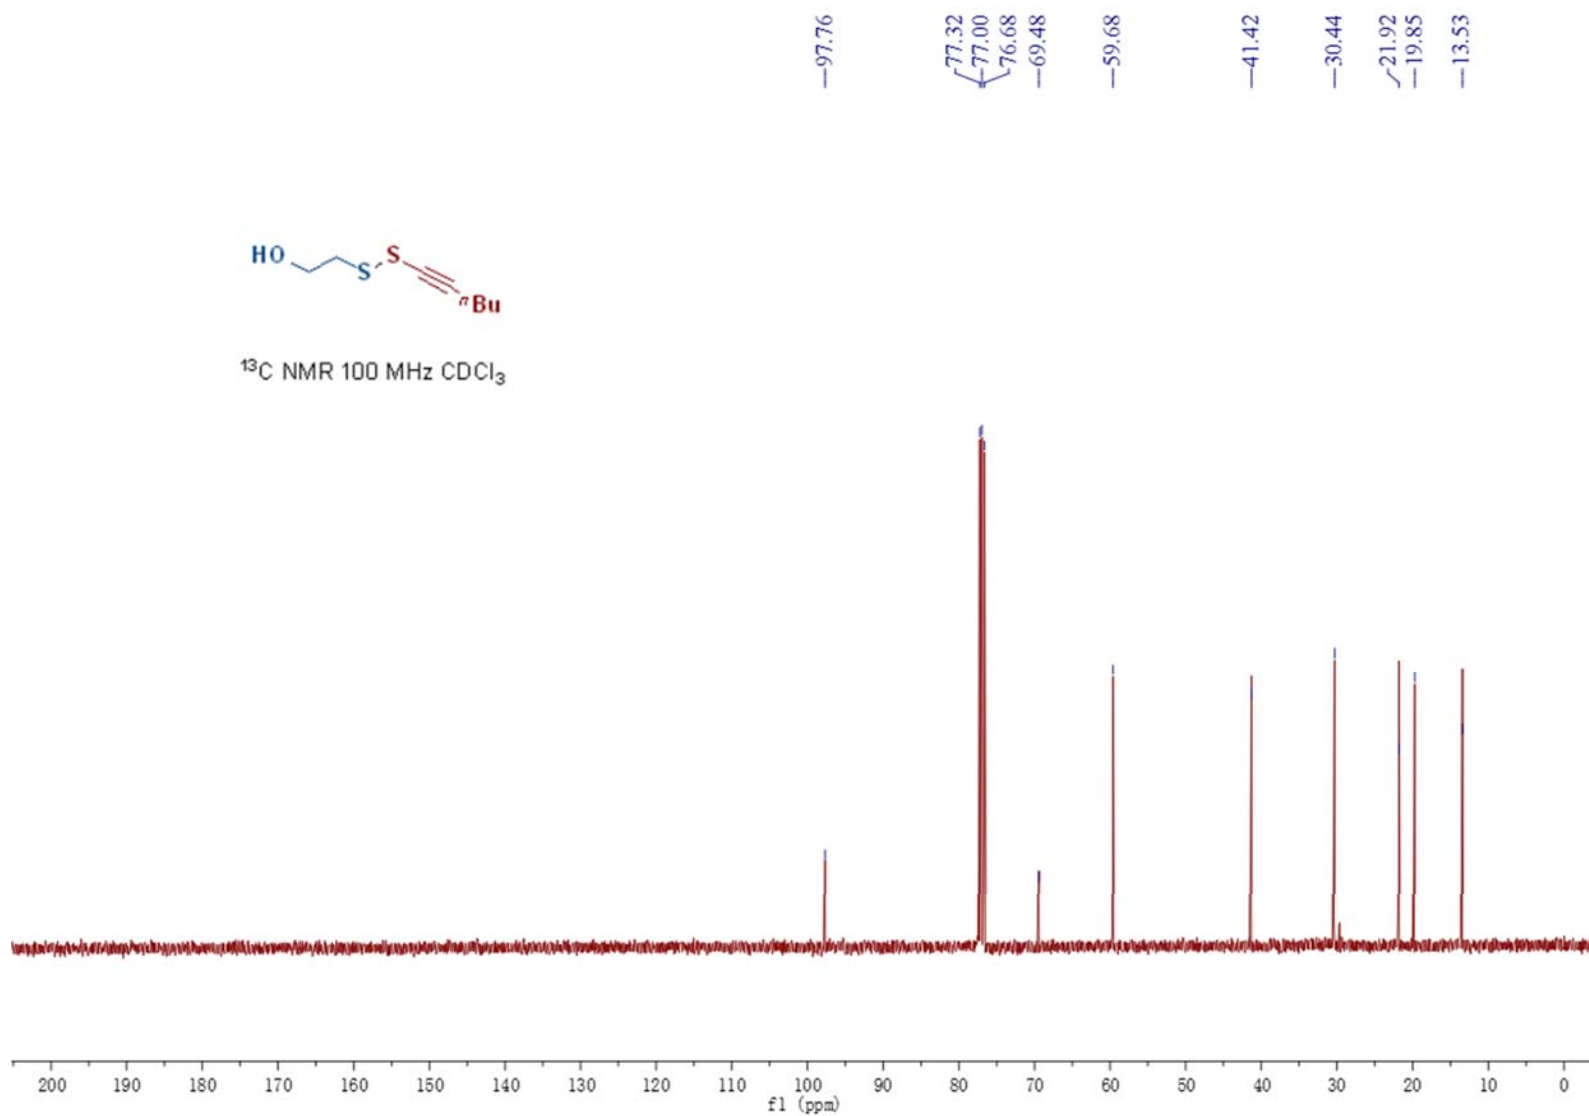

3f

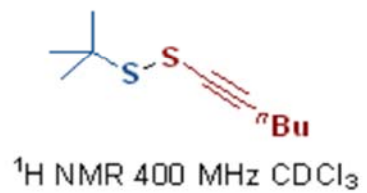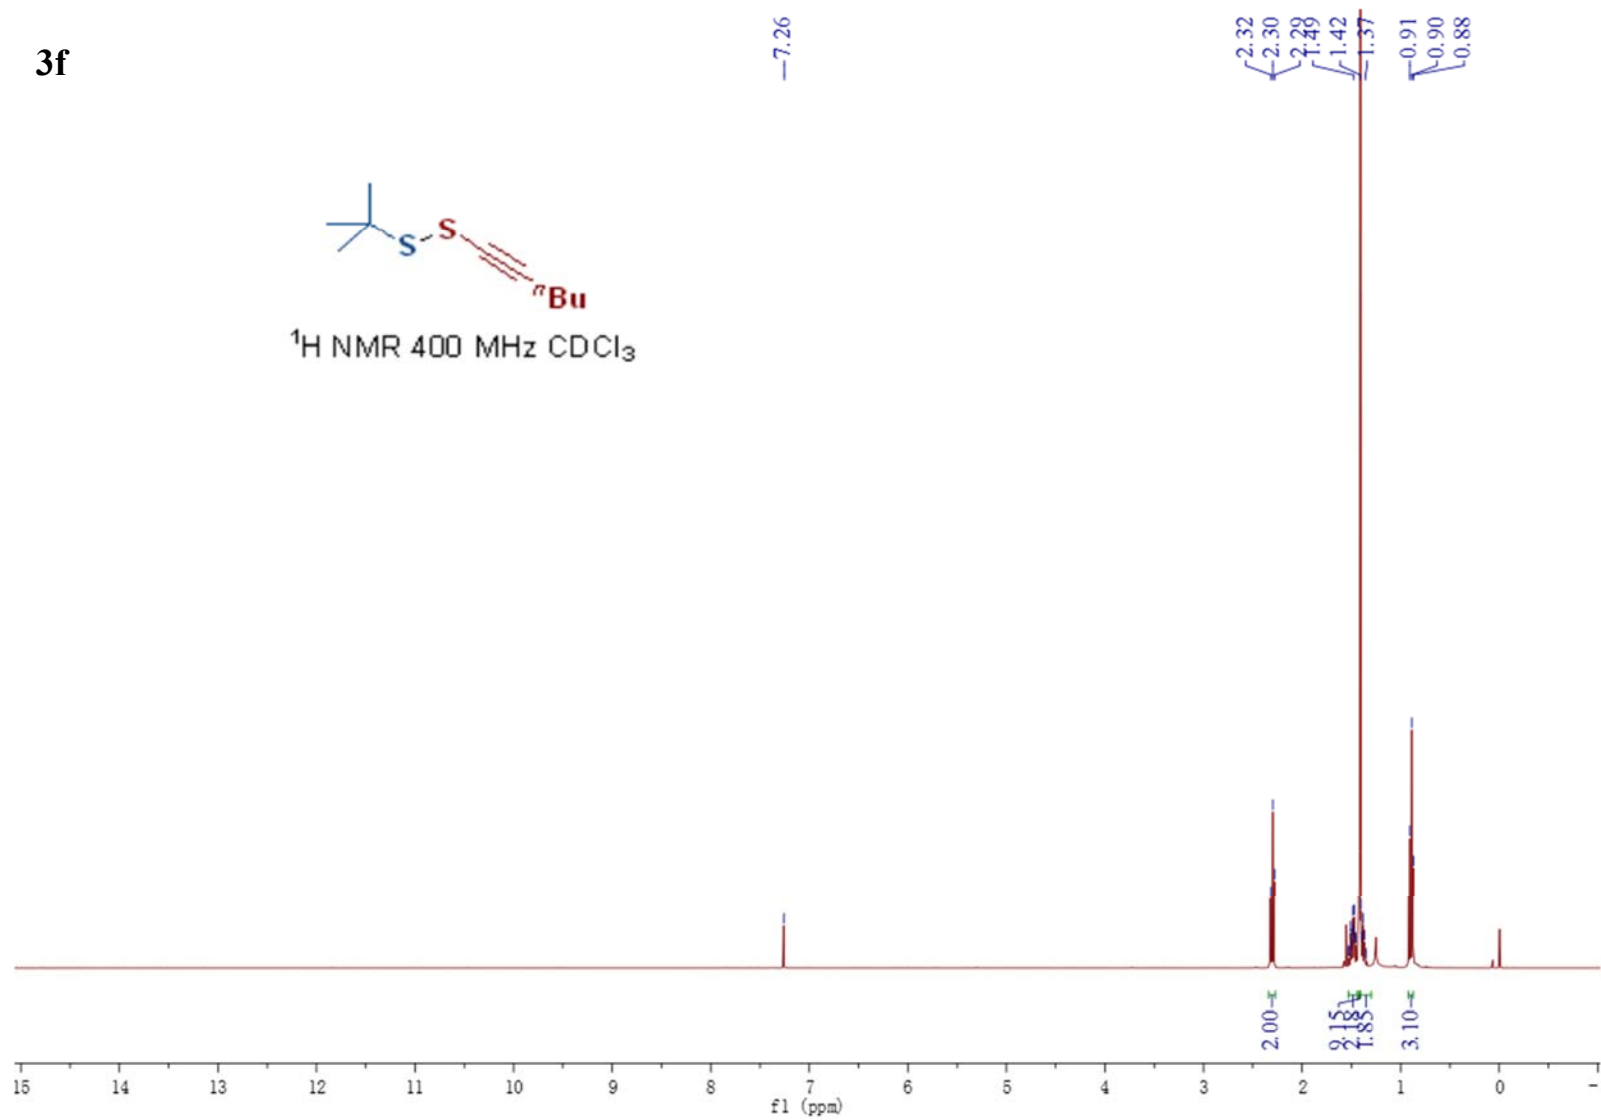

Copies of NMR spectra

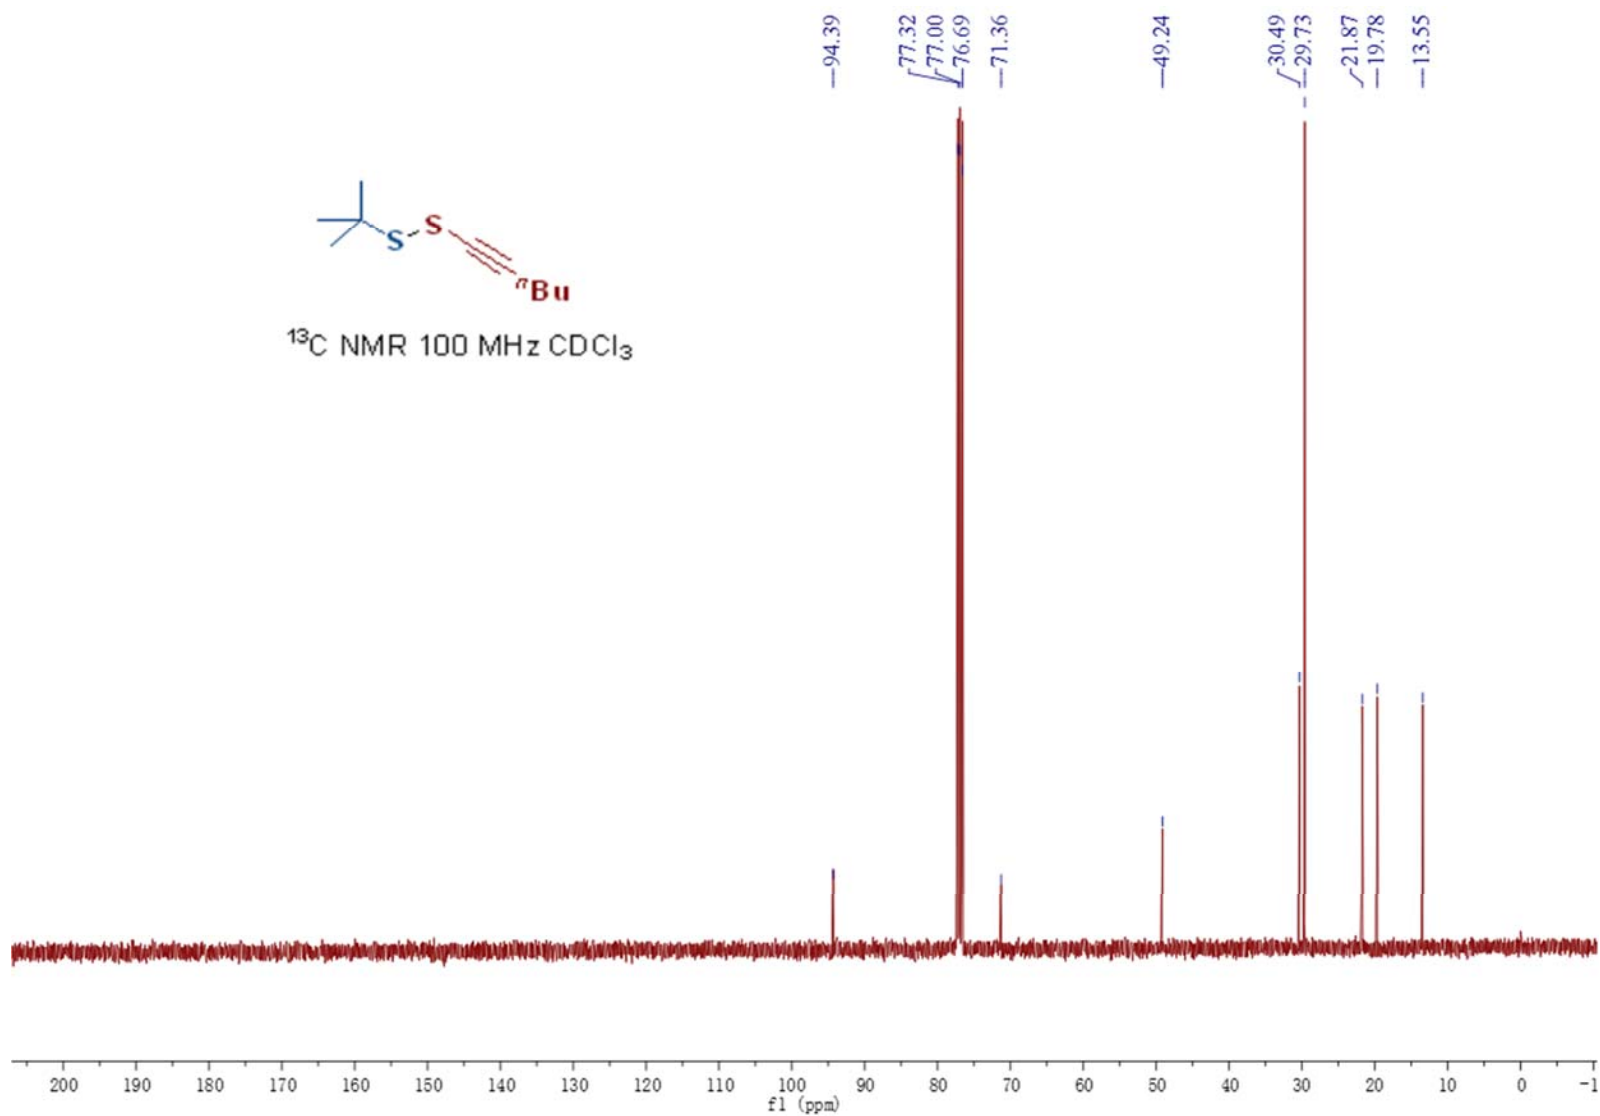

3g

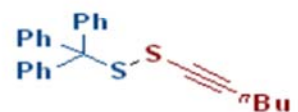

$^1\text{H NMR}$  400 MHz  $\text{CDCl}_3$

7.36  
7.35  
7.34  
7.33  
7.30  
7.28  
7.28  
7.26  
7.25

2.26  
2.24  
2.22  
1.47  
1.34  
0.92  
0.90  
0.88

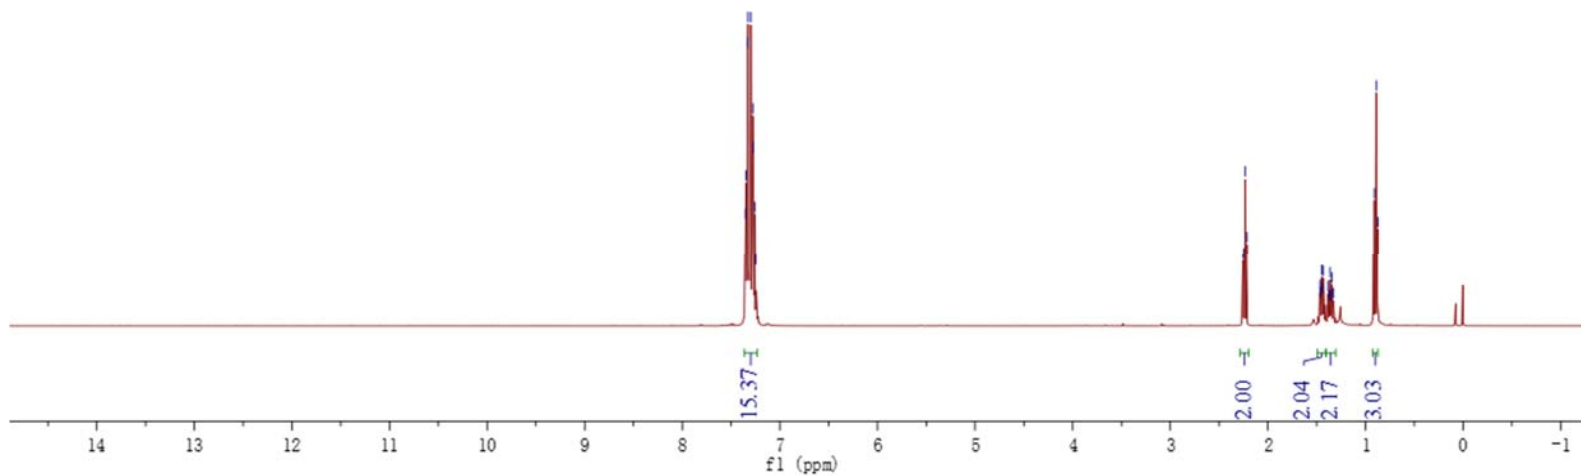



Copies of NMR spectra

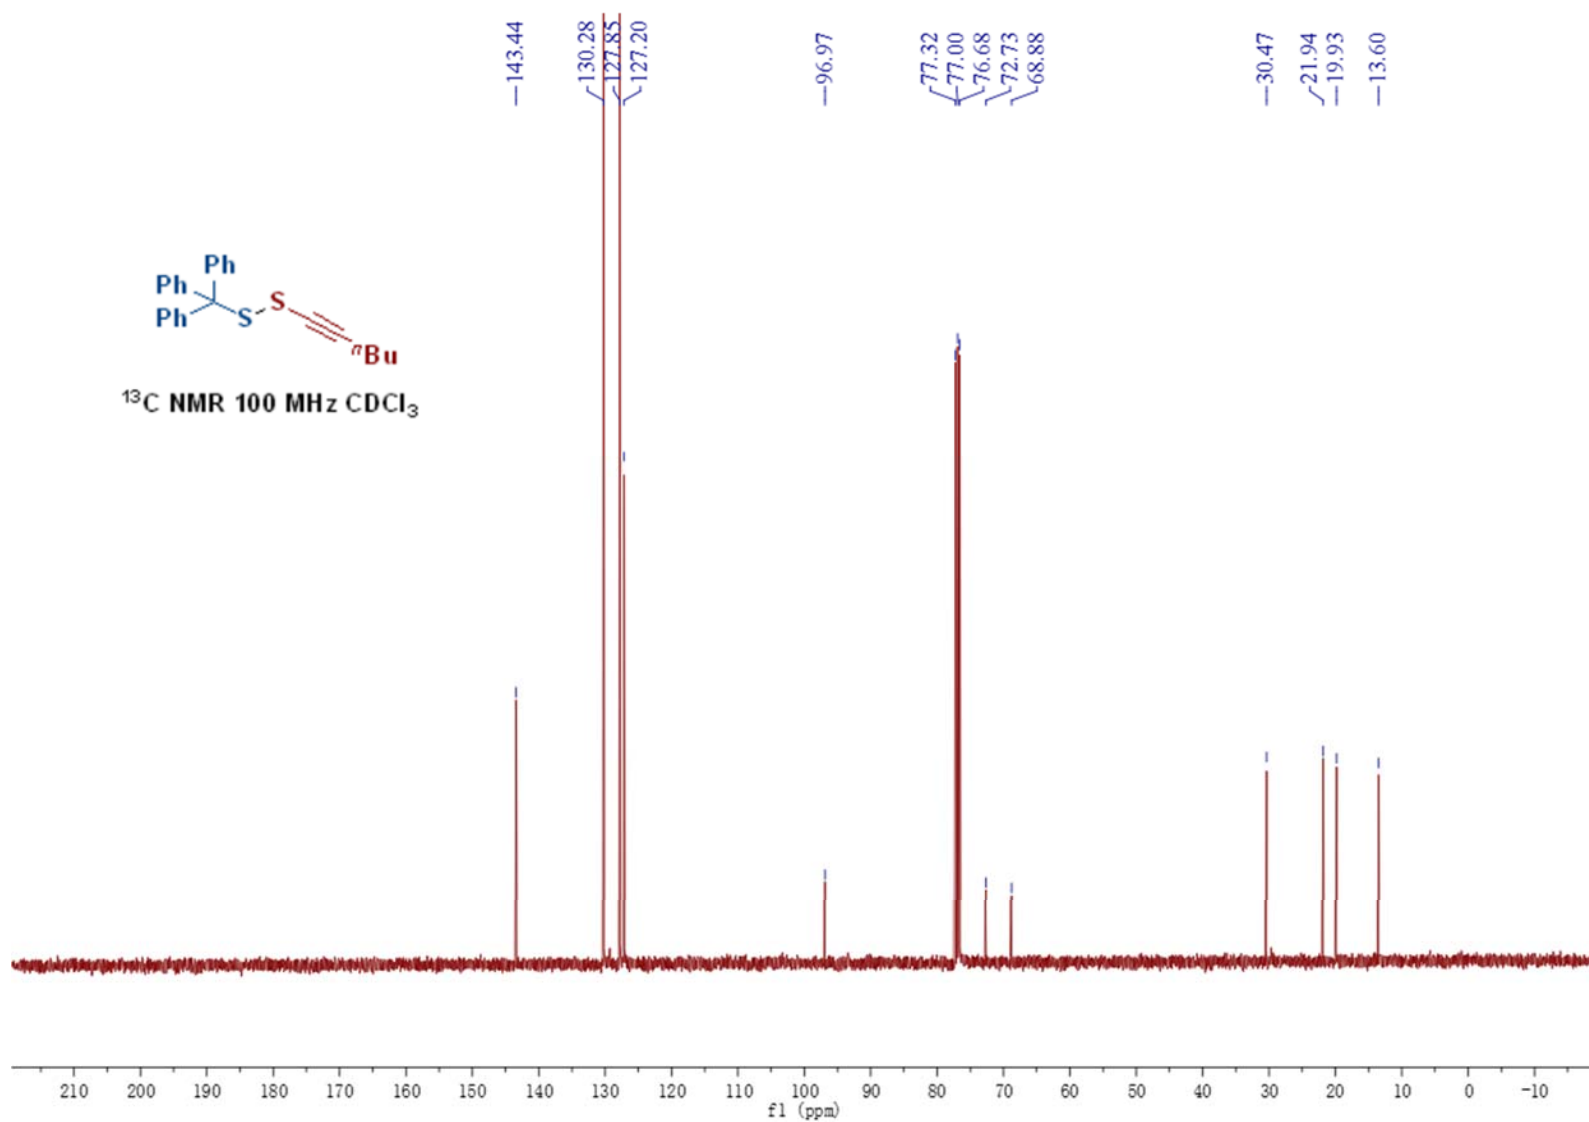

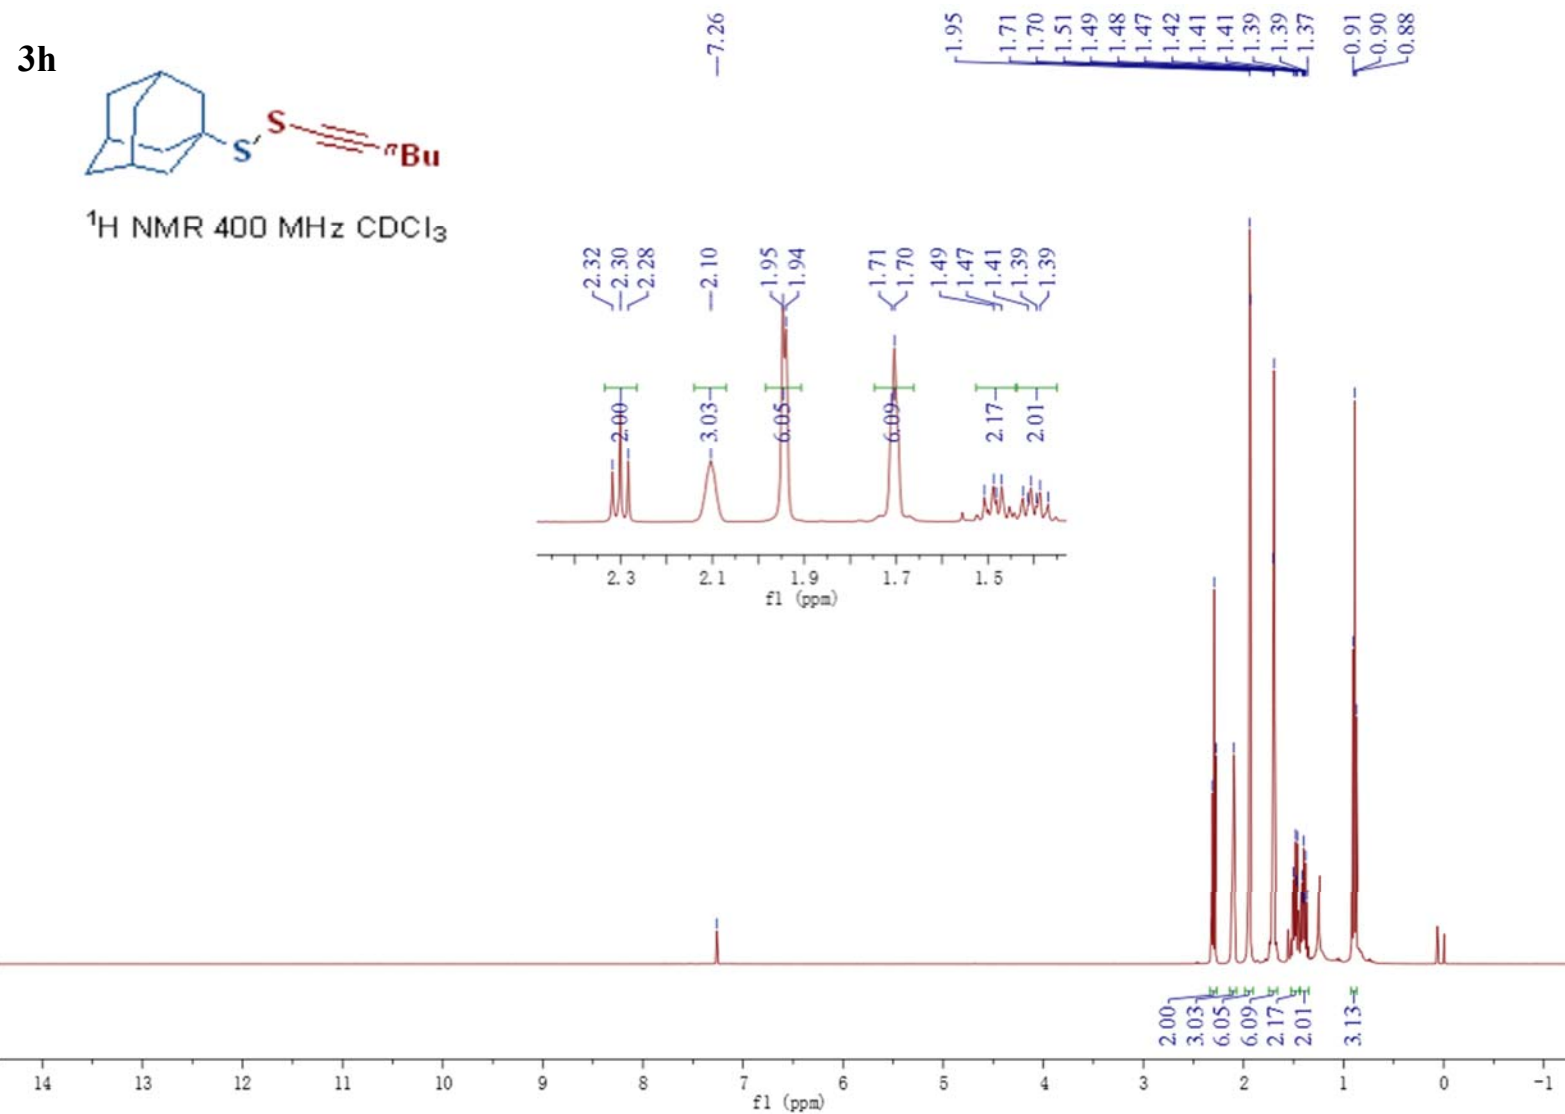

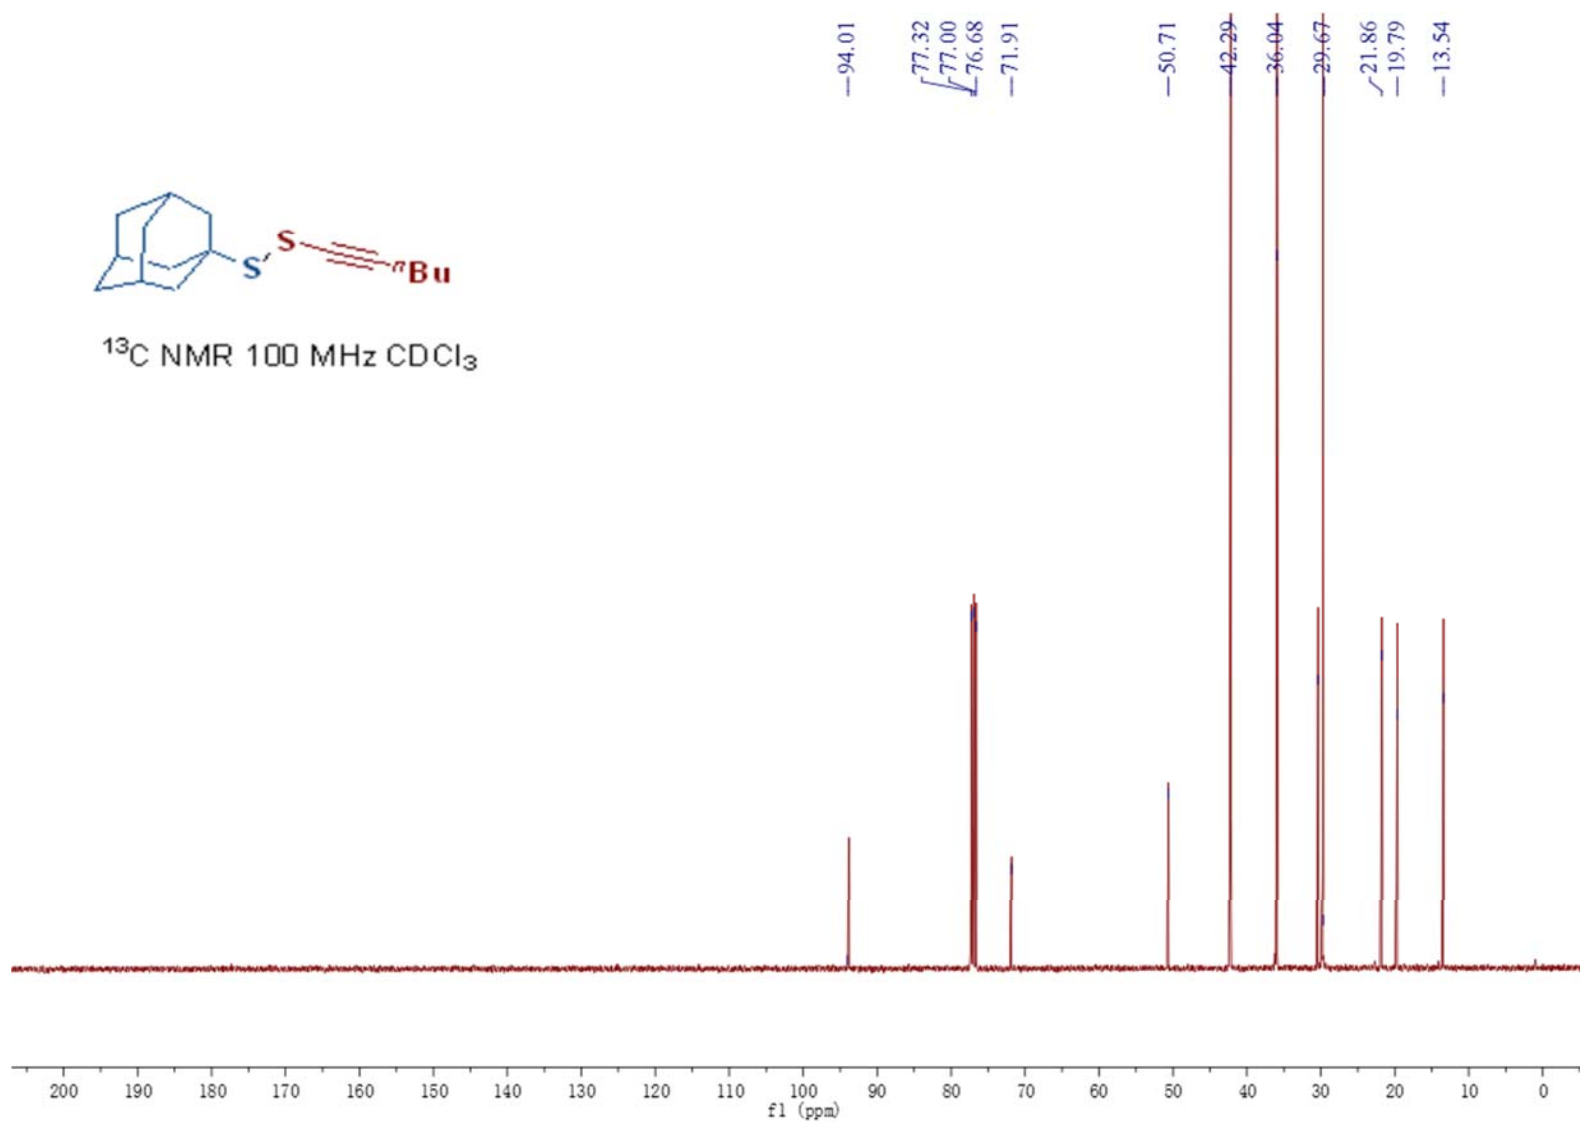

3i

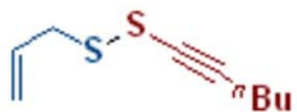

$^1\text{H NMR}$  400 MHz  $\text{CDCl}_3$

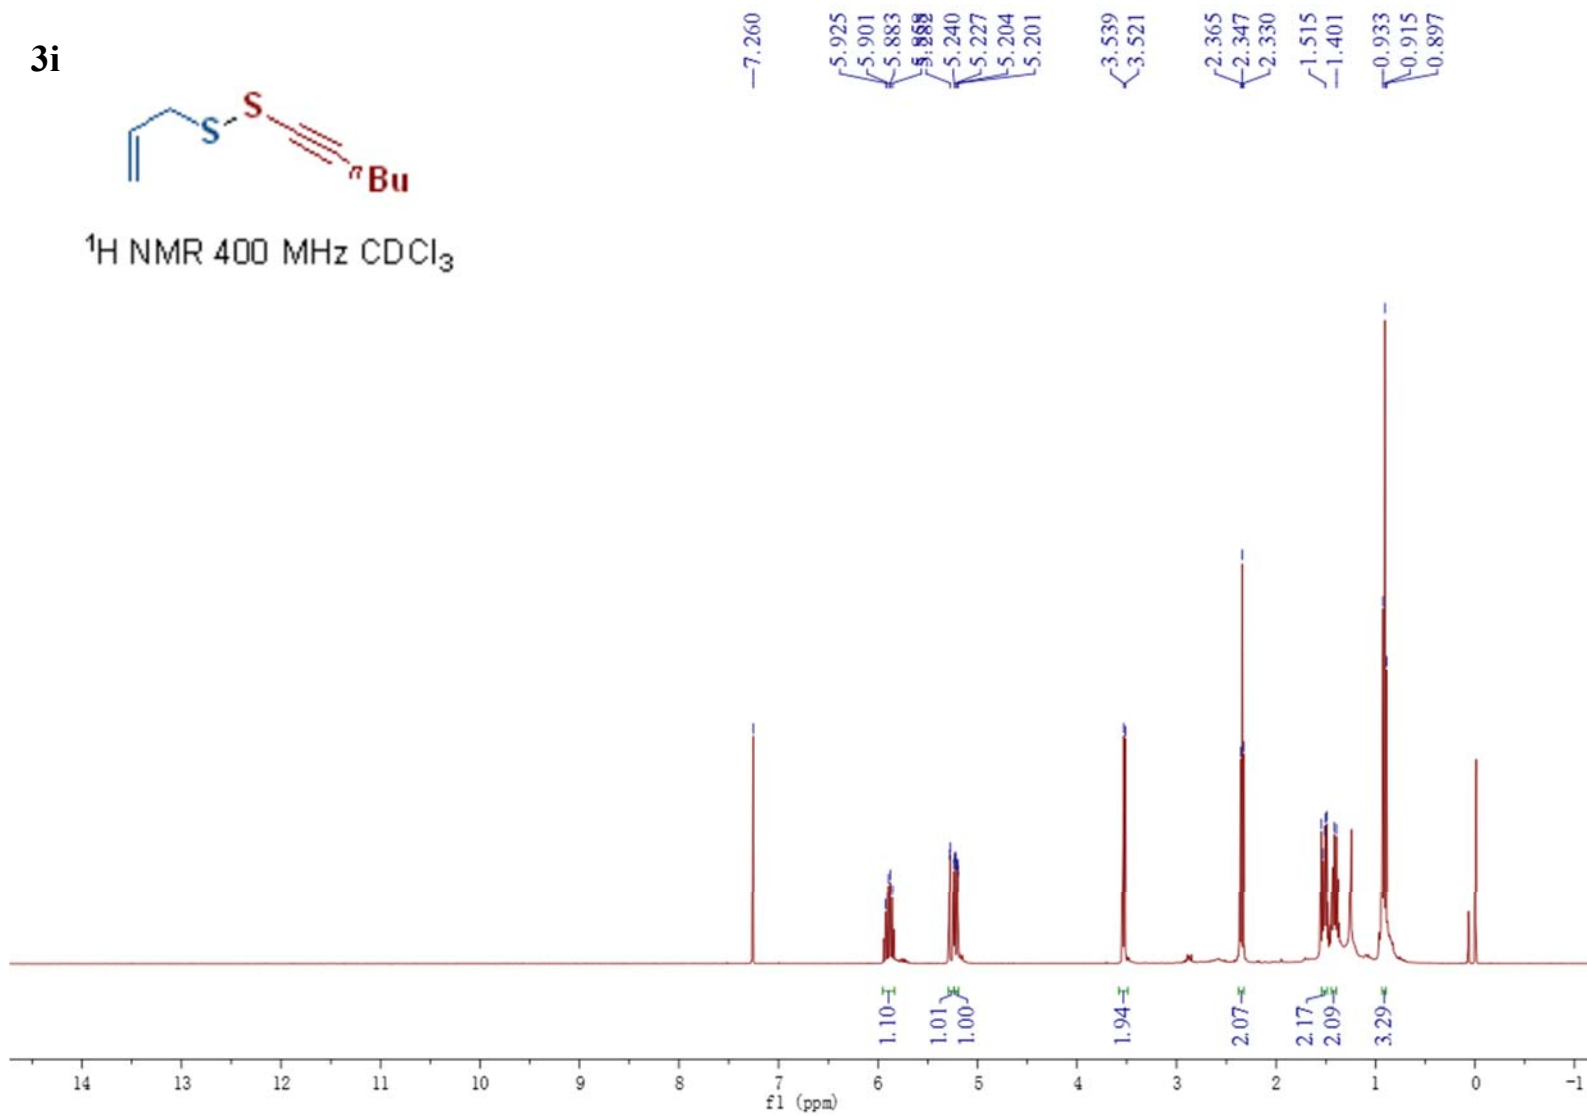

Copies of NMR spectra

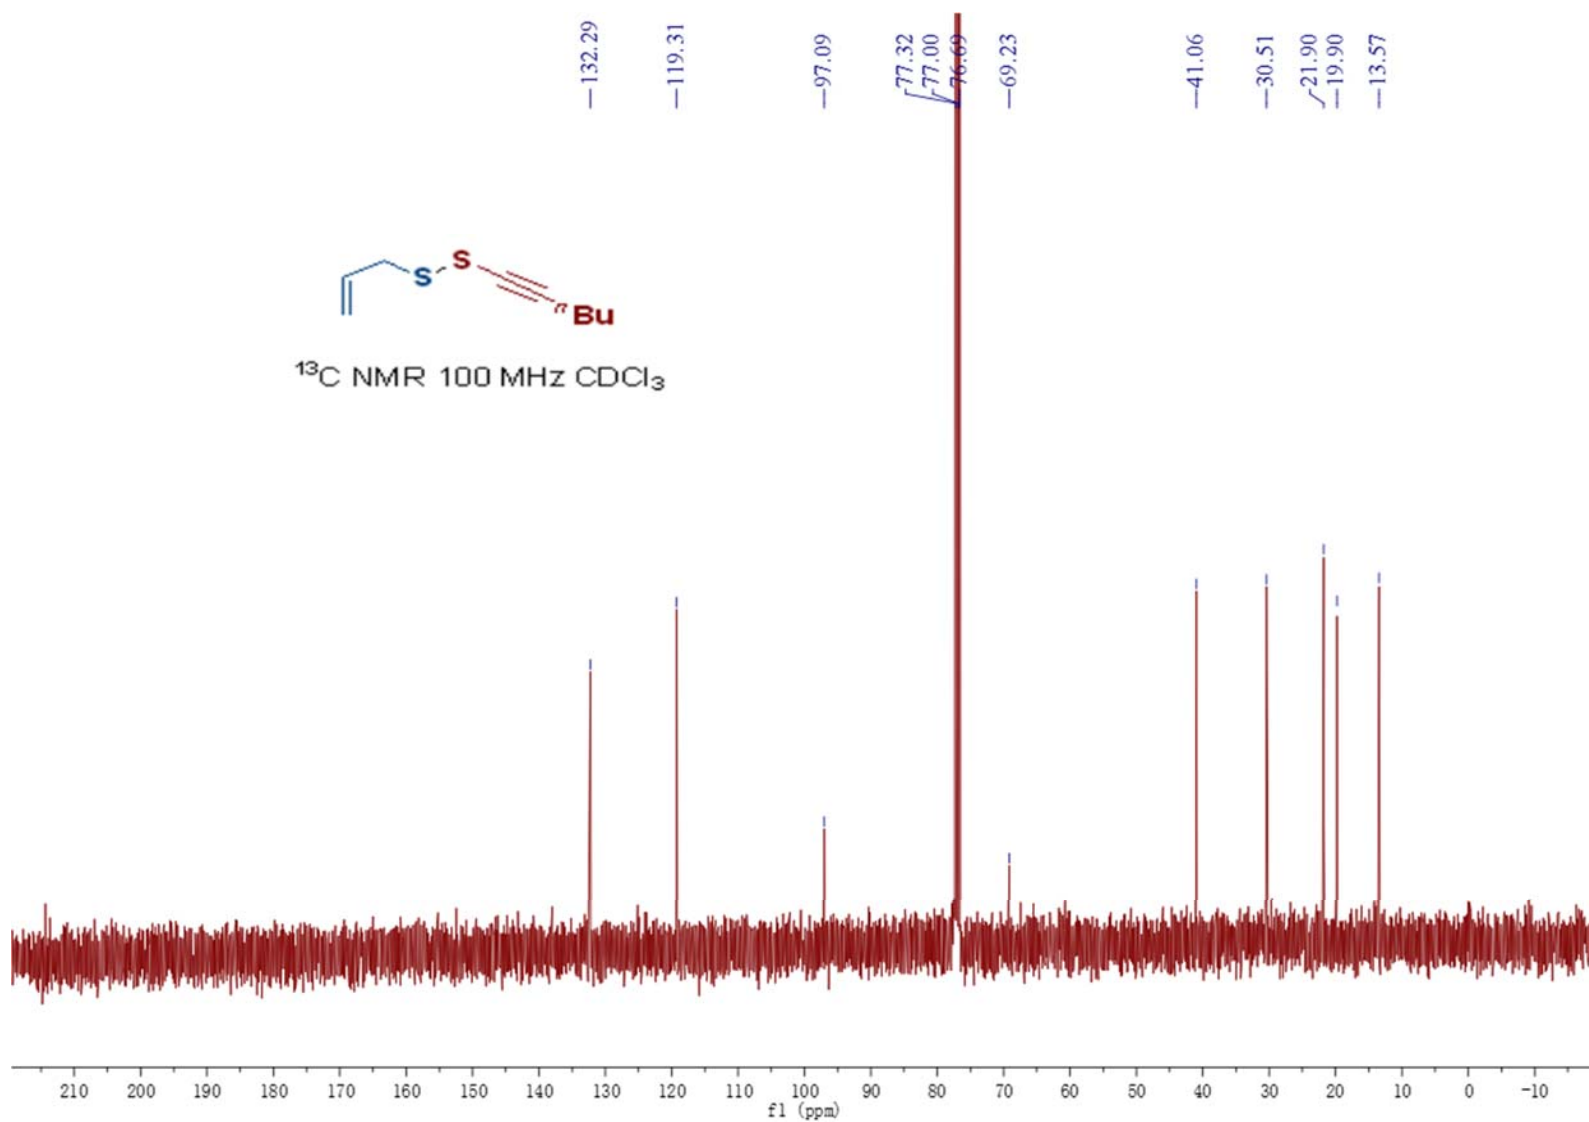

3j

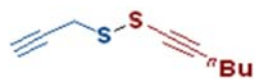

<sup>1</sup>H NMR 400 MHz CDCl<sub>3</sub>

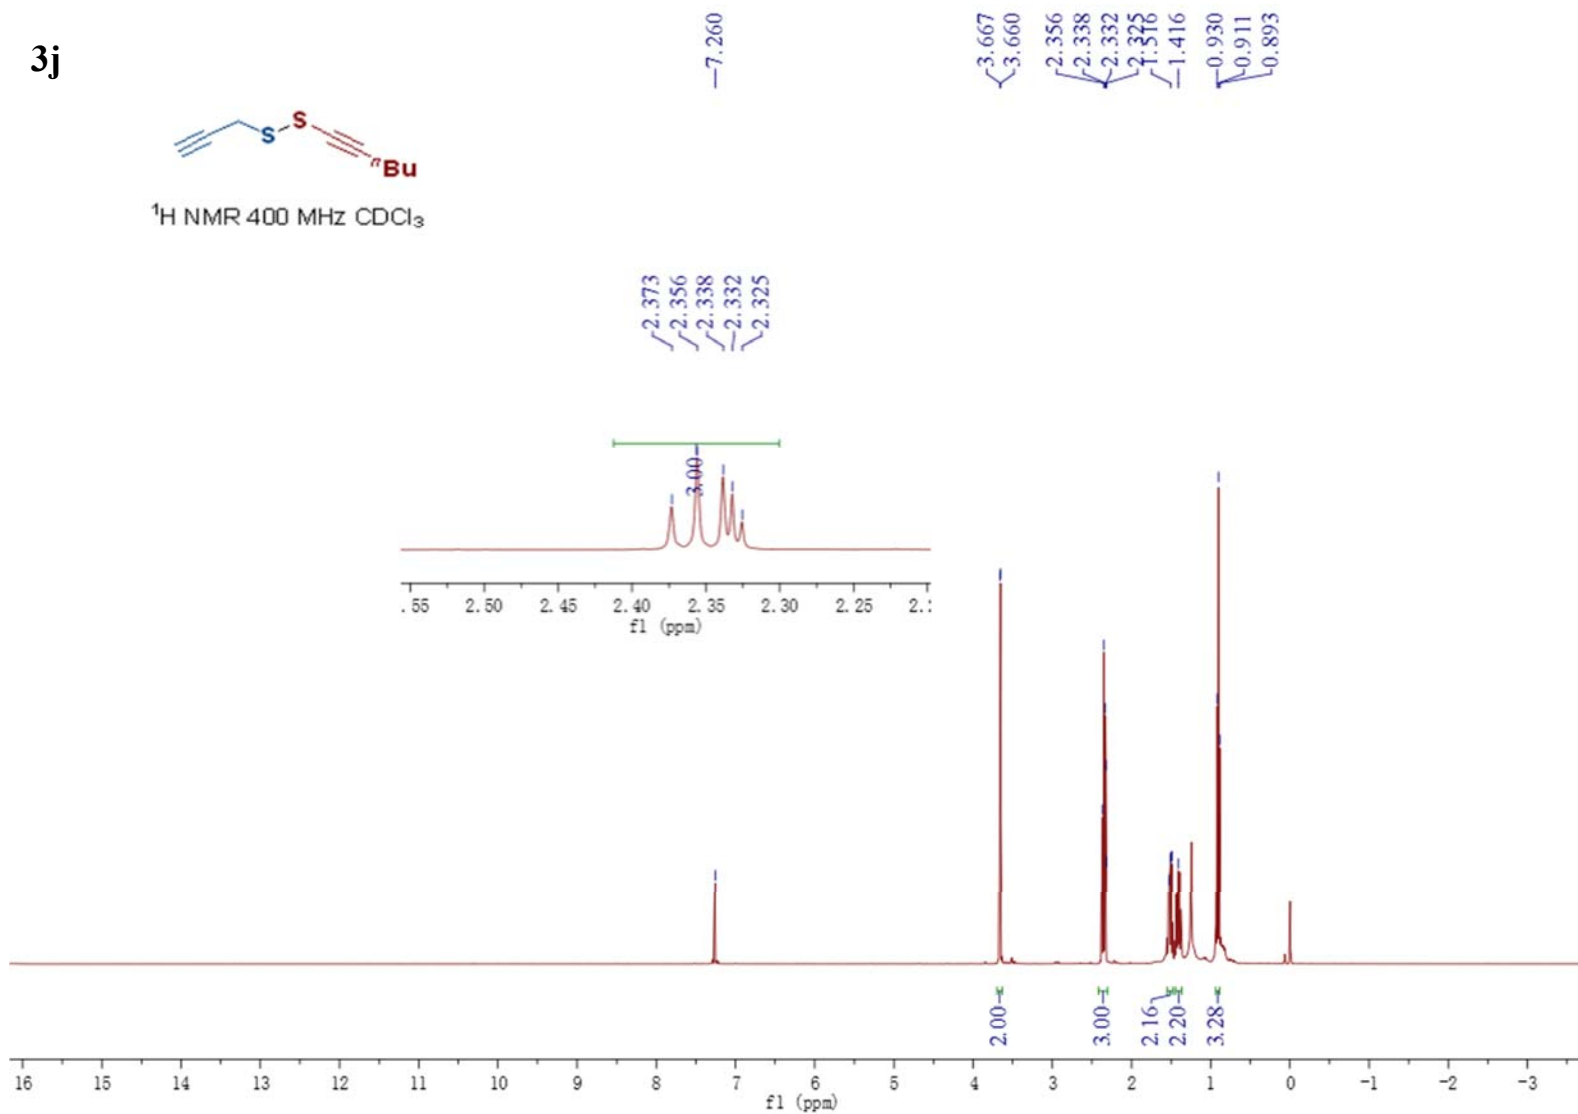

Copies of NMR spectra

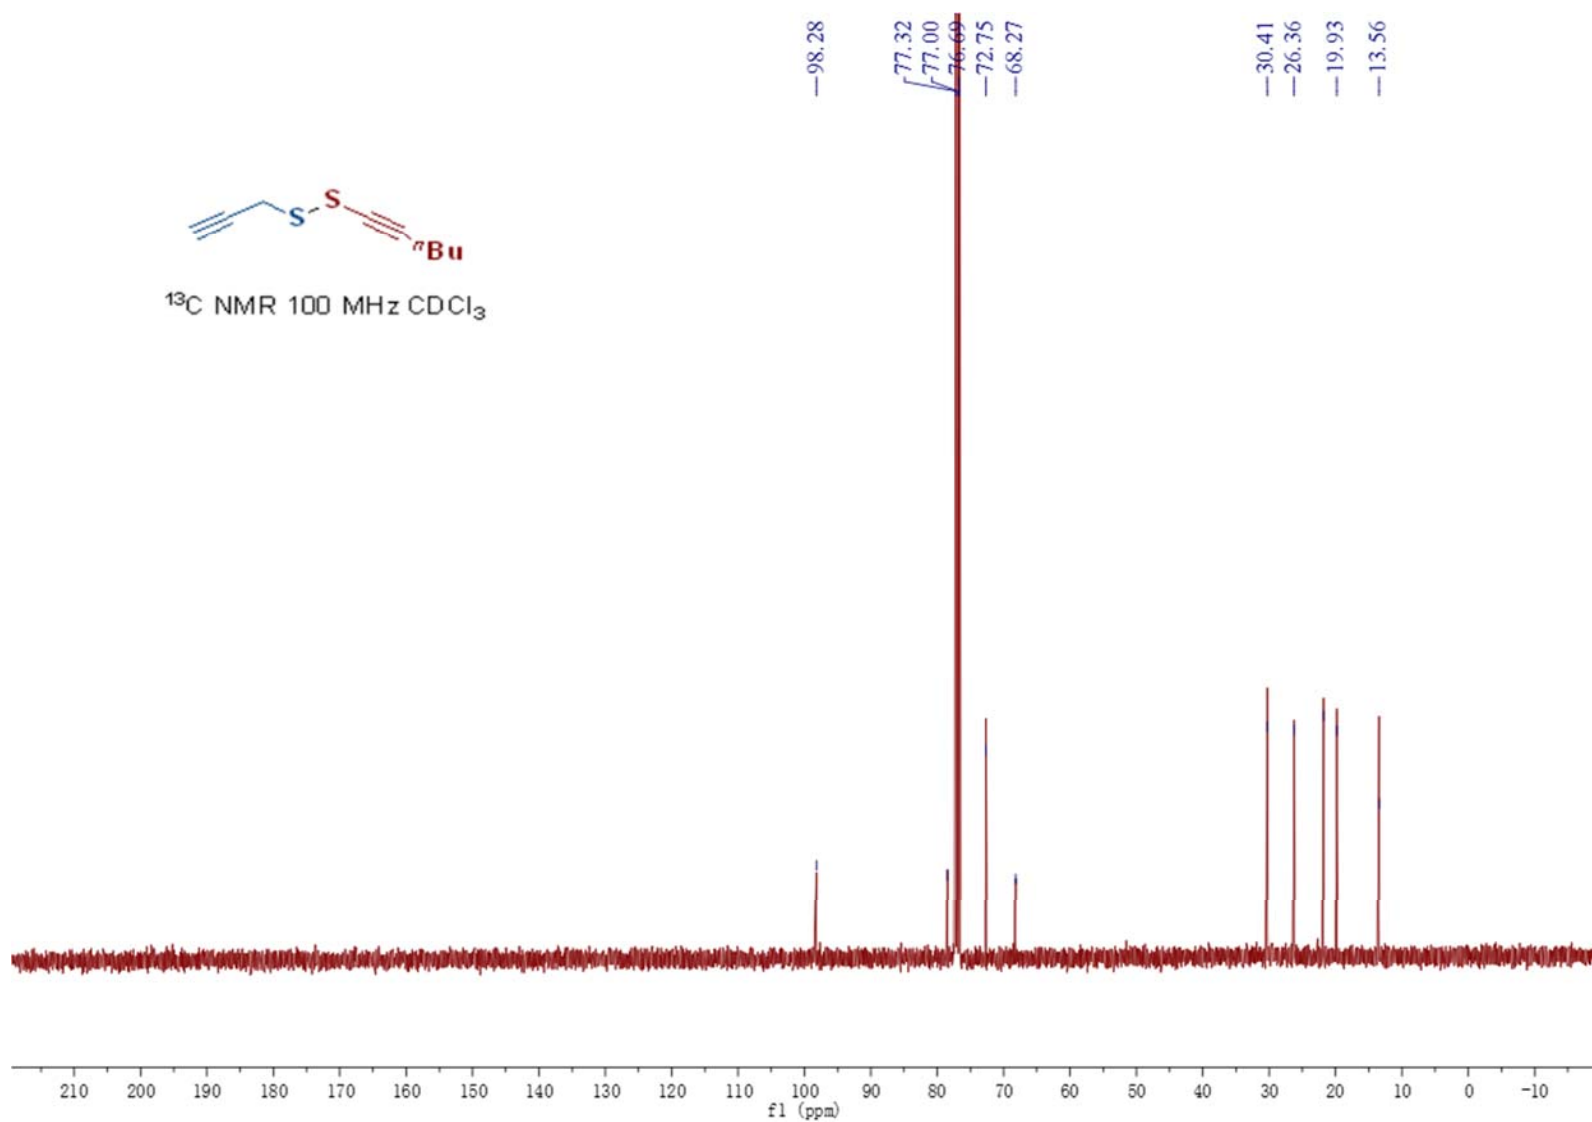

3k

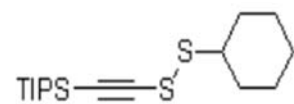

<sup>1</sup>H NMR 400 MHz CDCl<sub>3</sub>

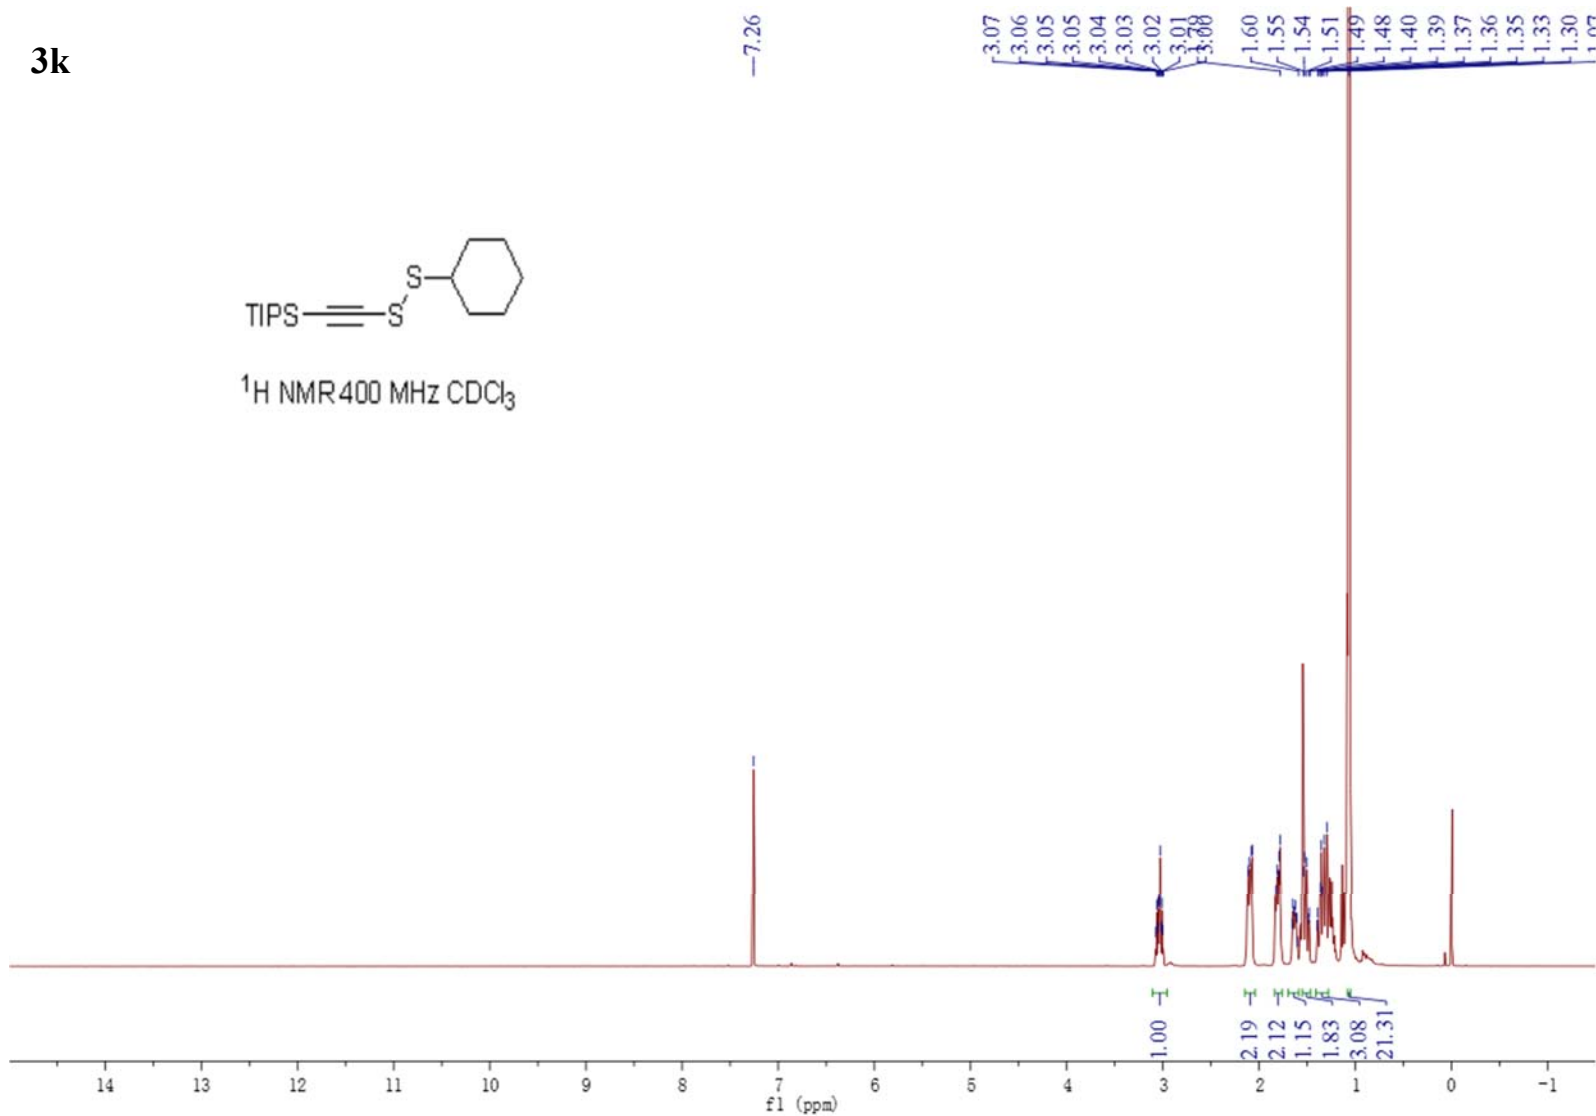



Copies of NMR spectra

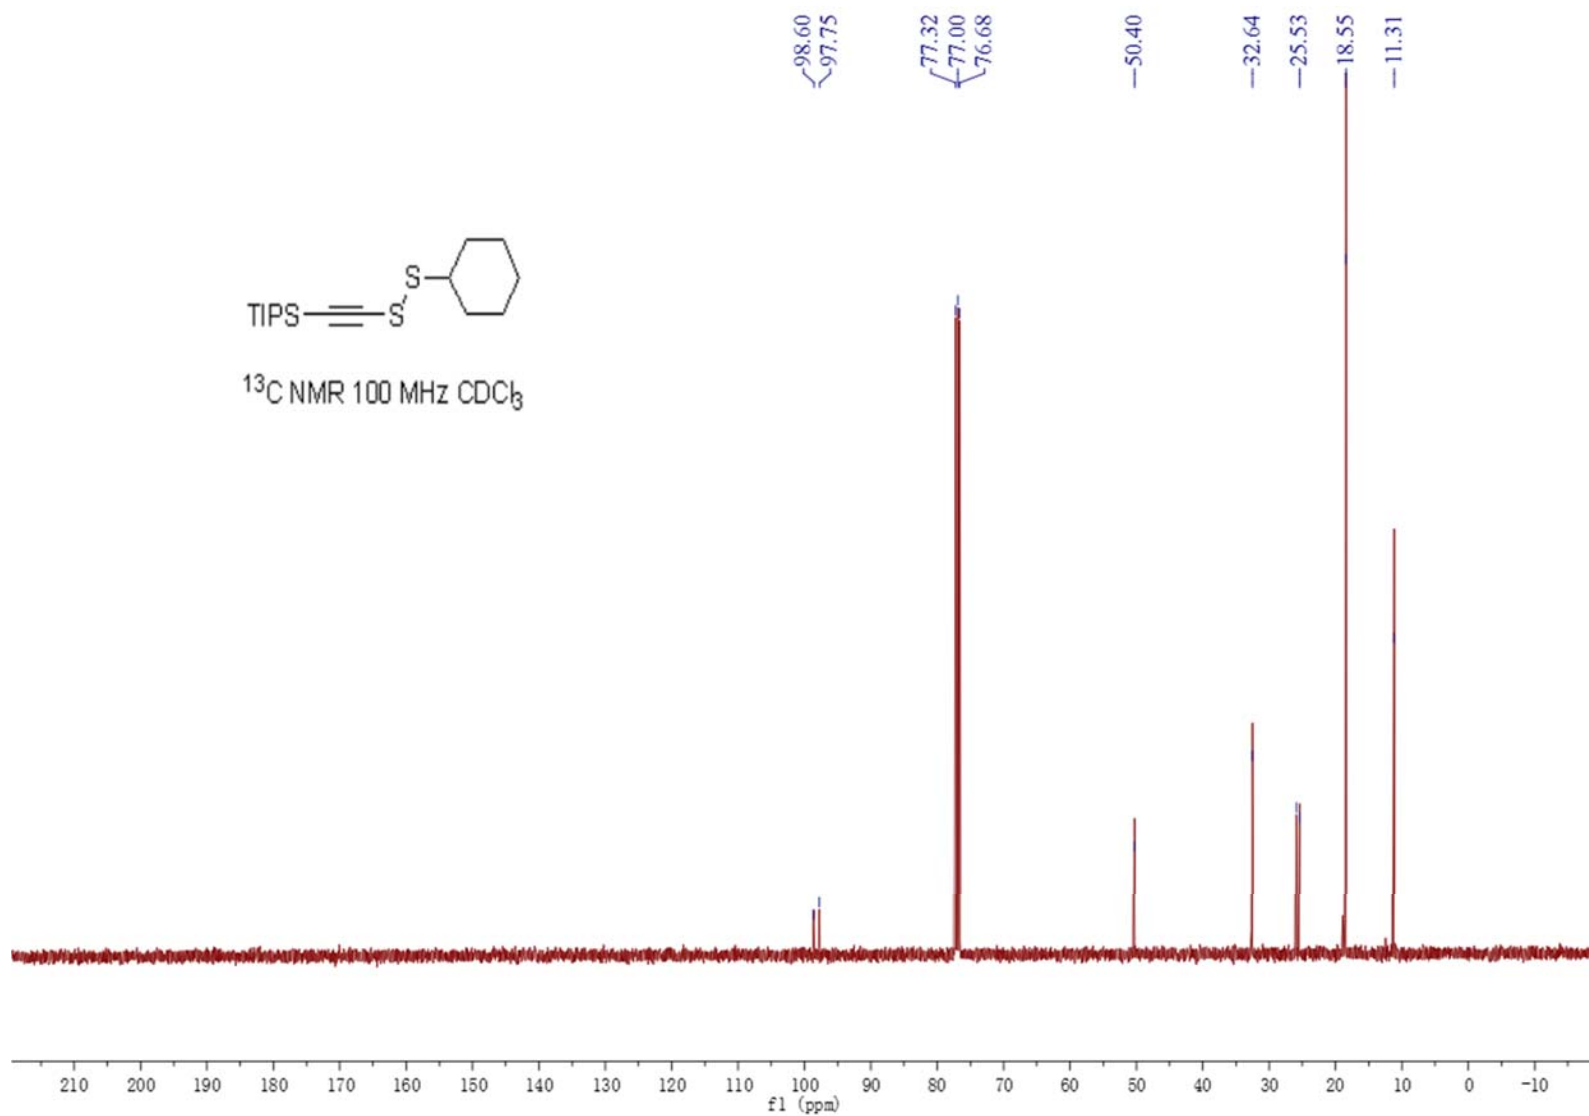

31

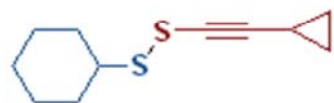

$^1\text{H}$  NMR 400 MHz  $\text{CDCl}_3$

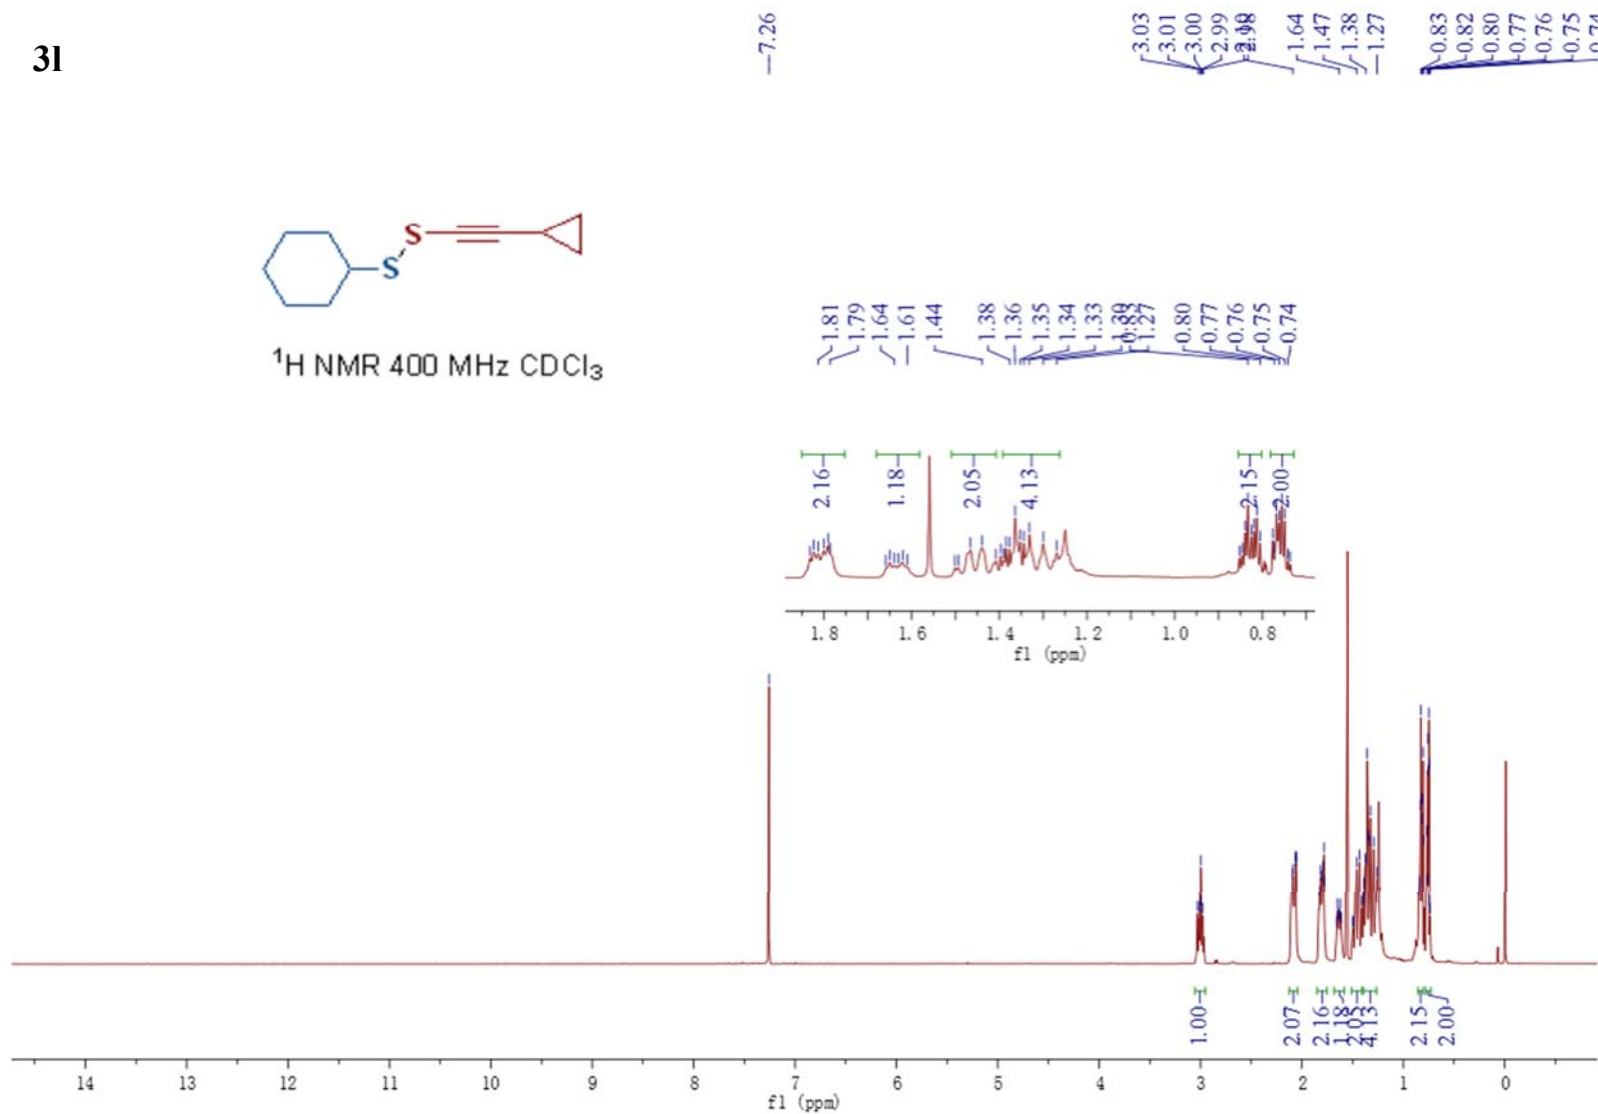

Copies of NMR spectra

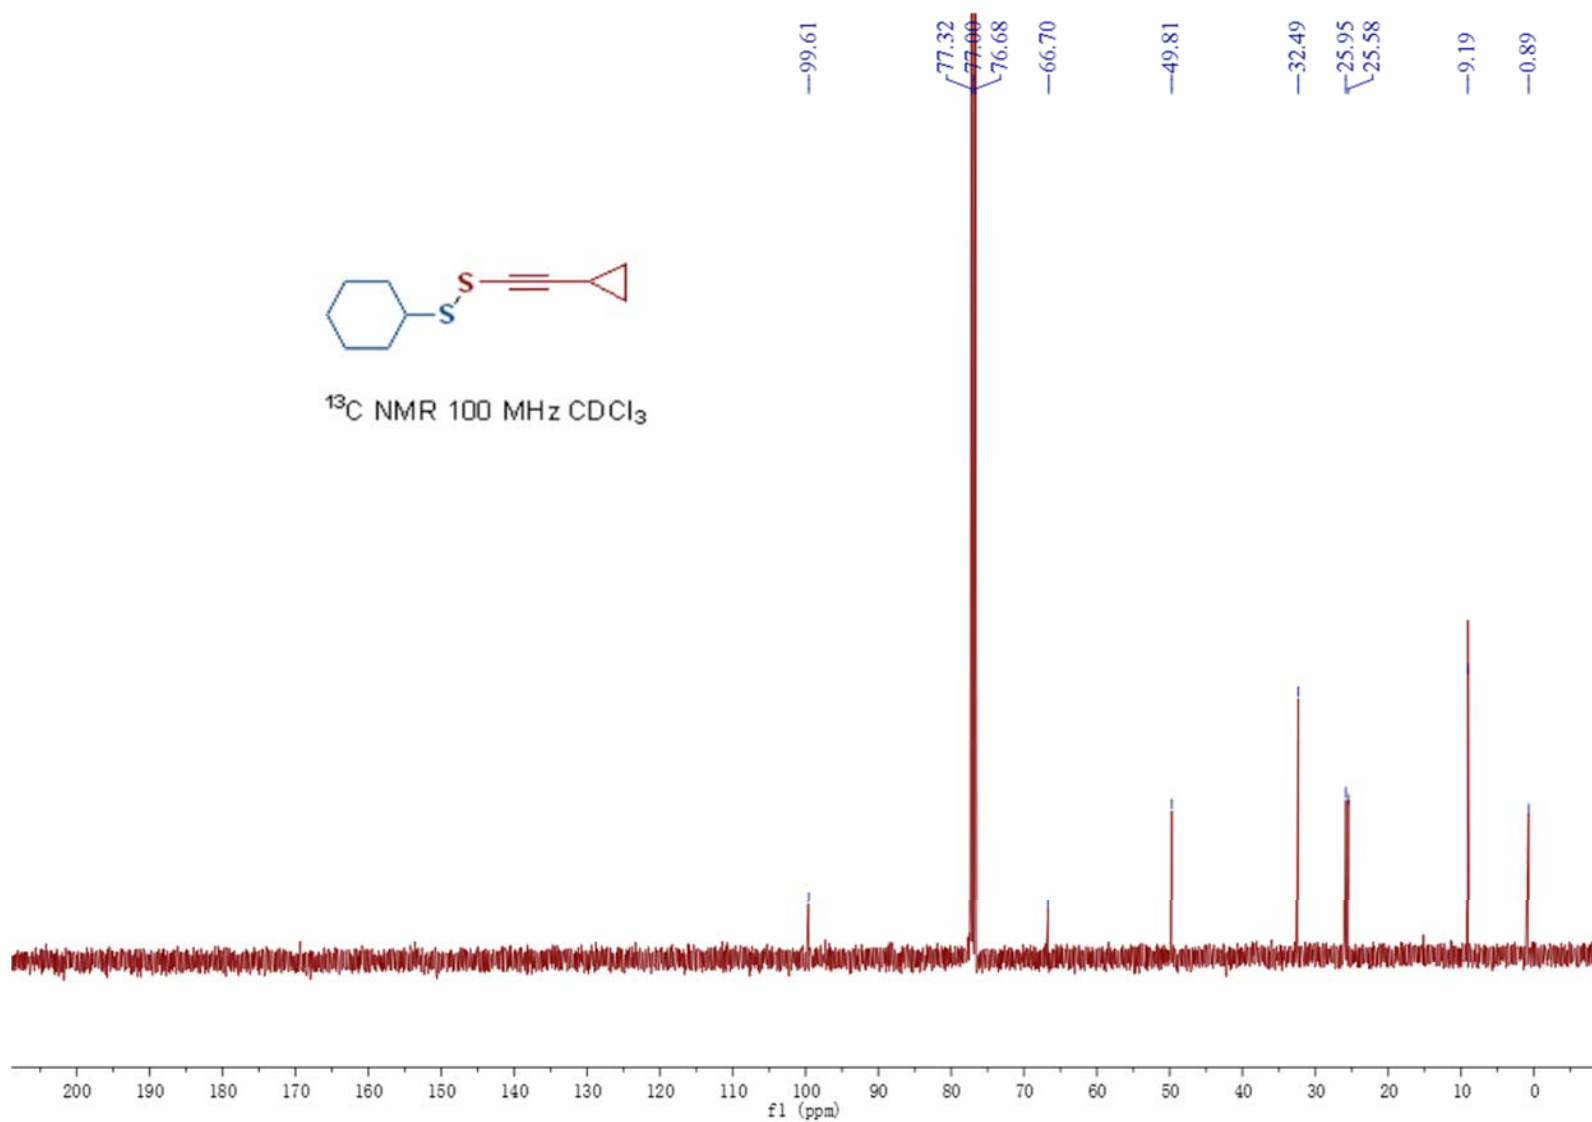

3m

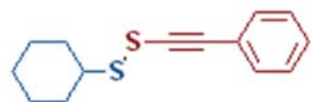

$^1\text{H NMR}$  400 MHz  $\text{CDCl}_3$

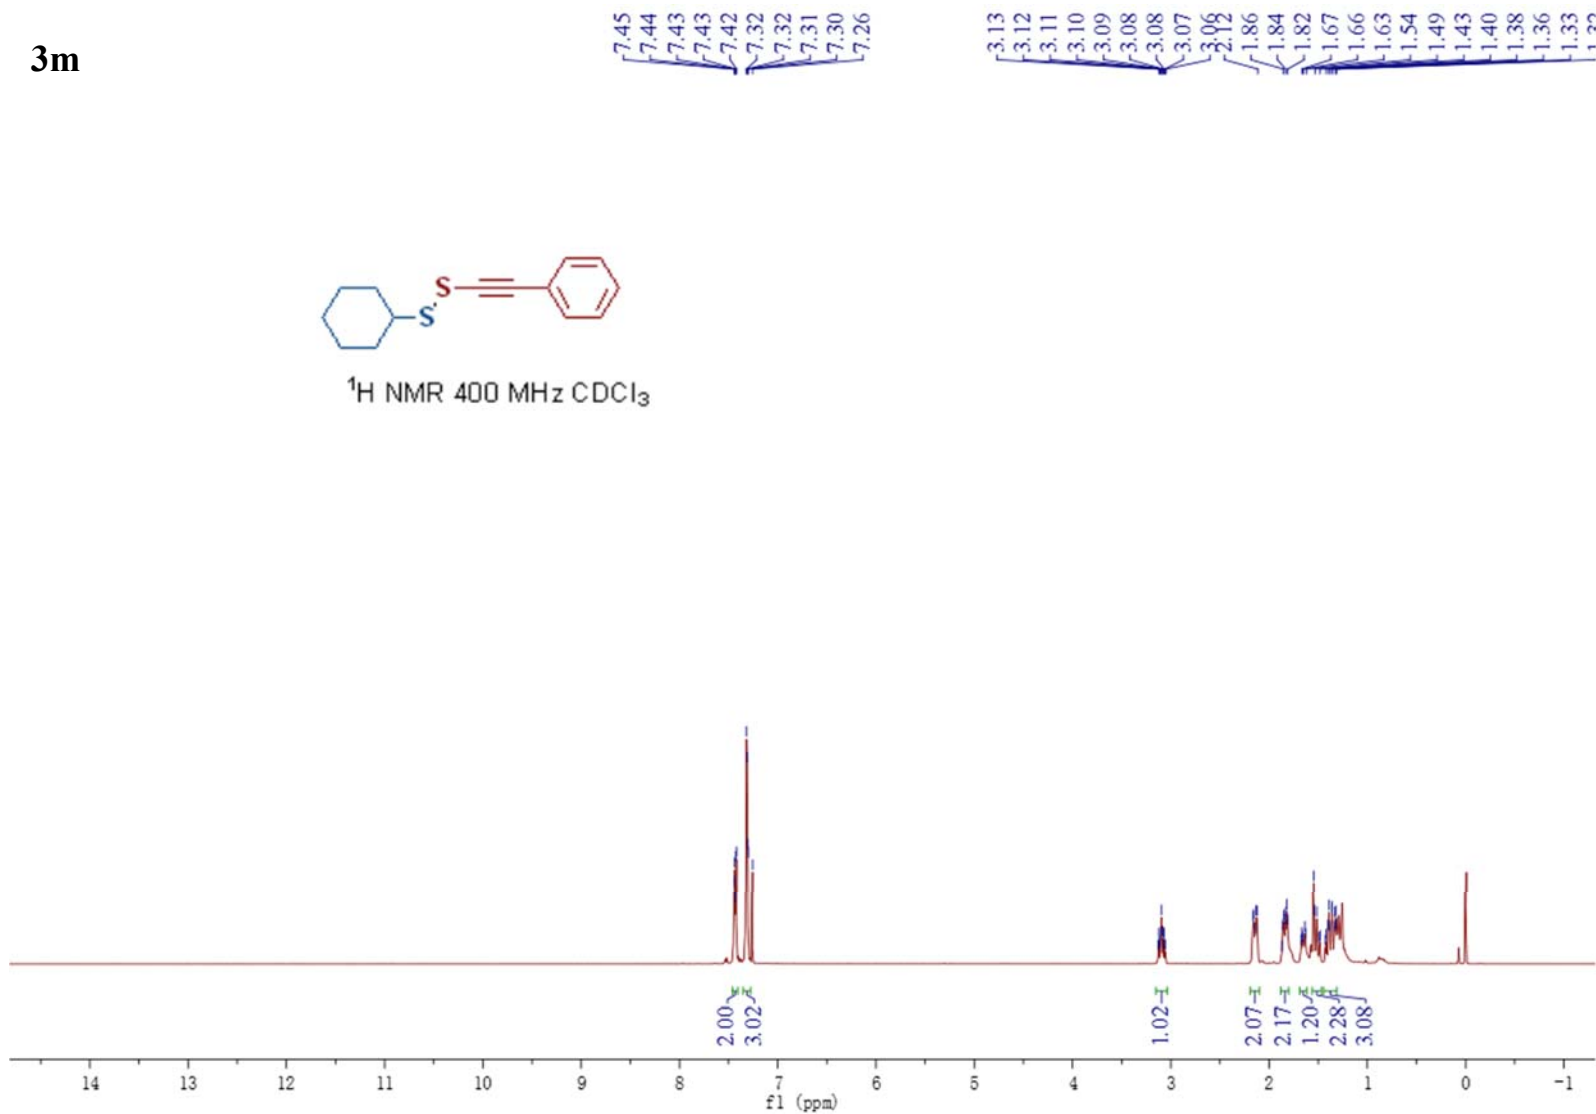

Copies of NMR spectra

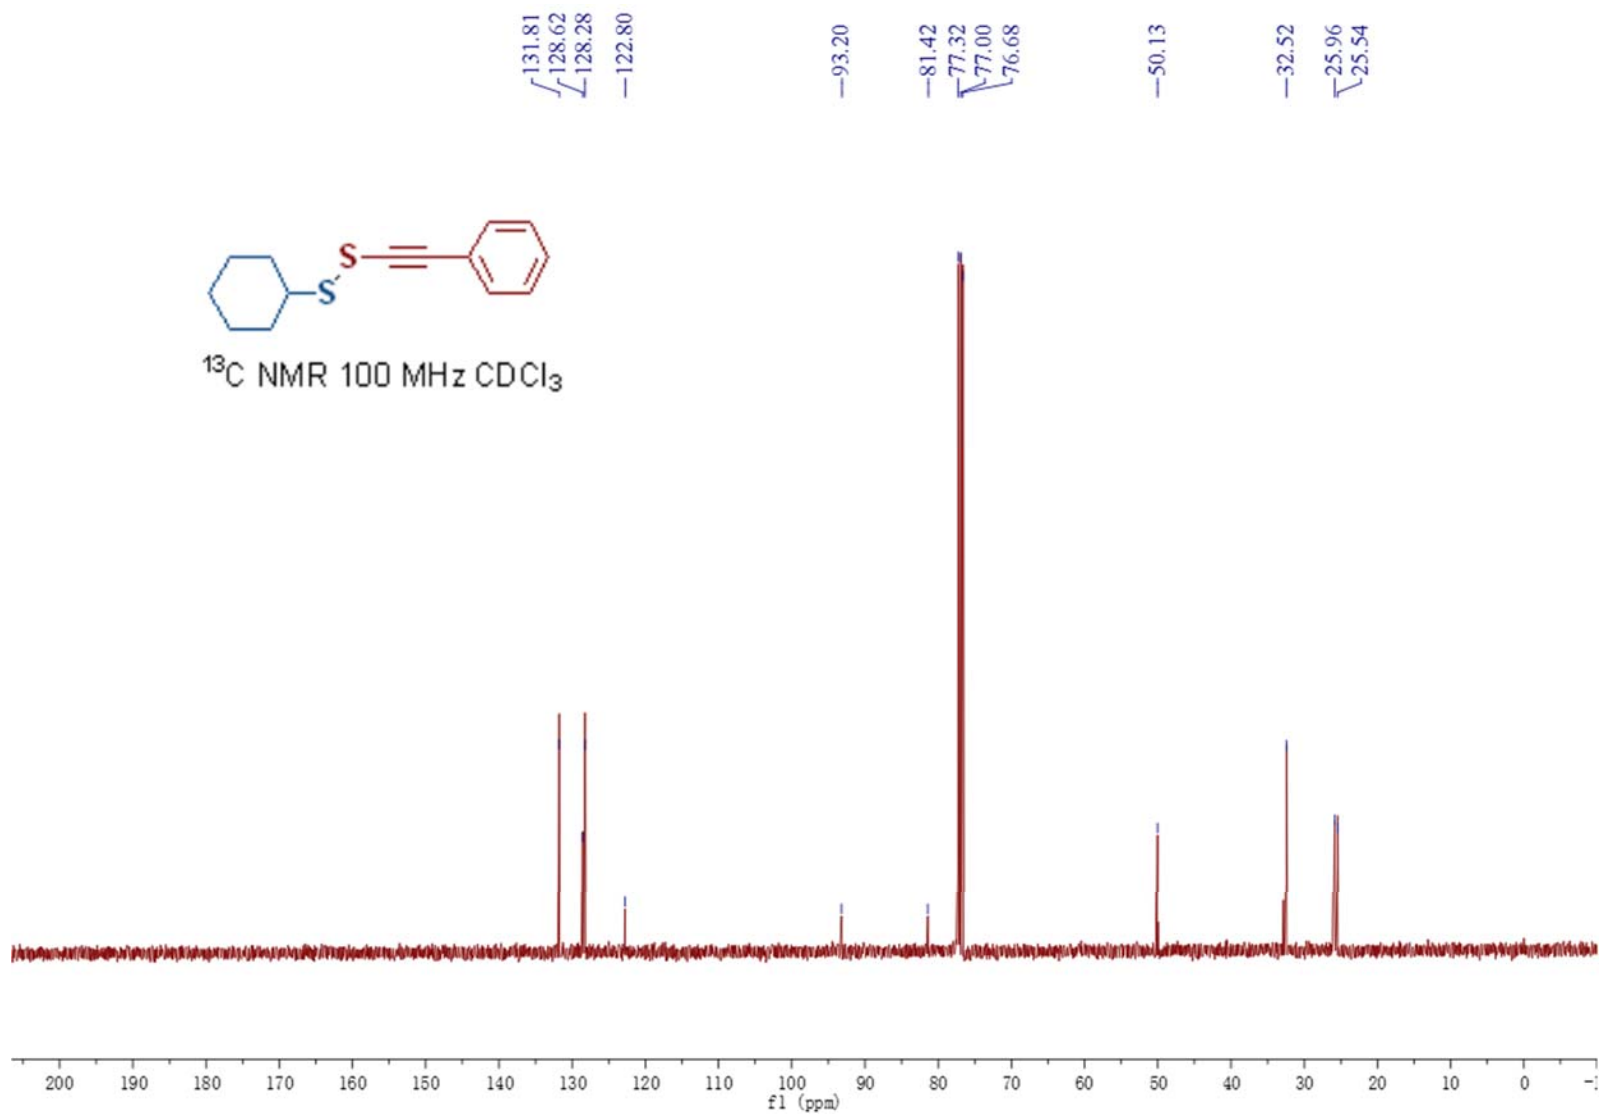

3n

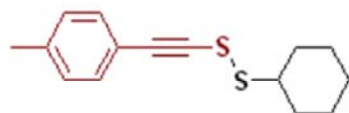

<sup>1</sup>H NMR 400 MHz CDCl<sub>3</sub>

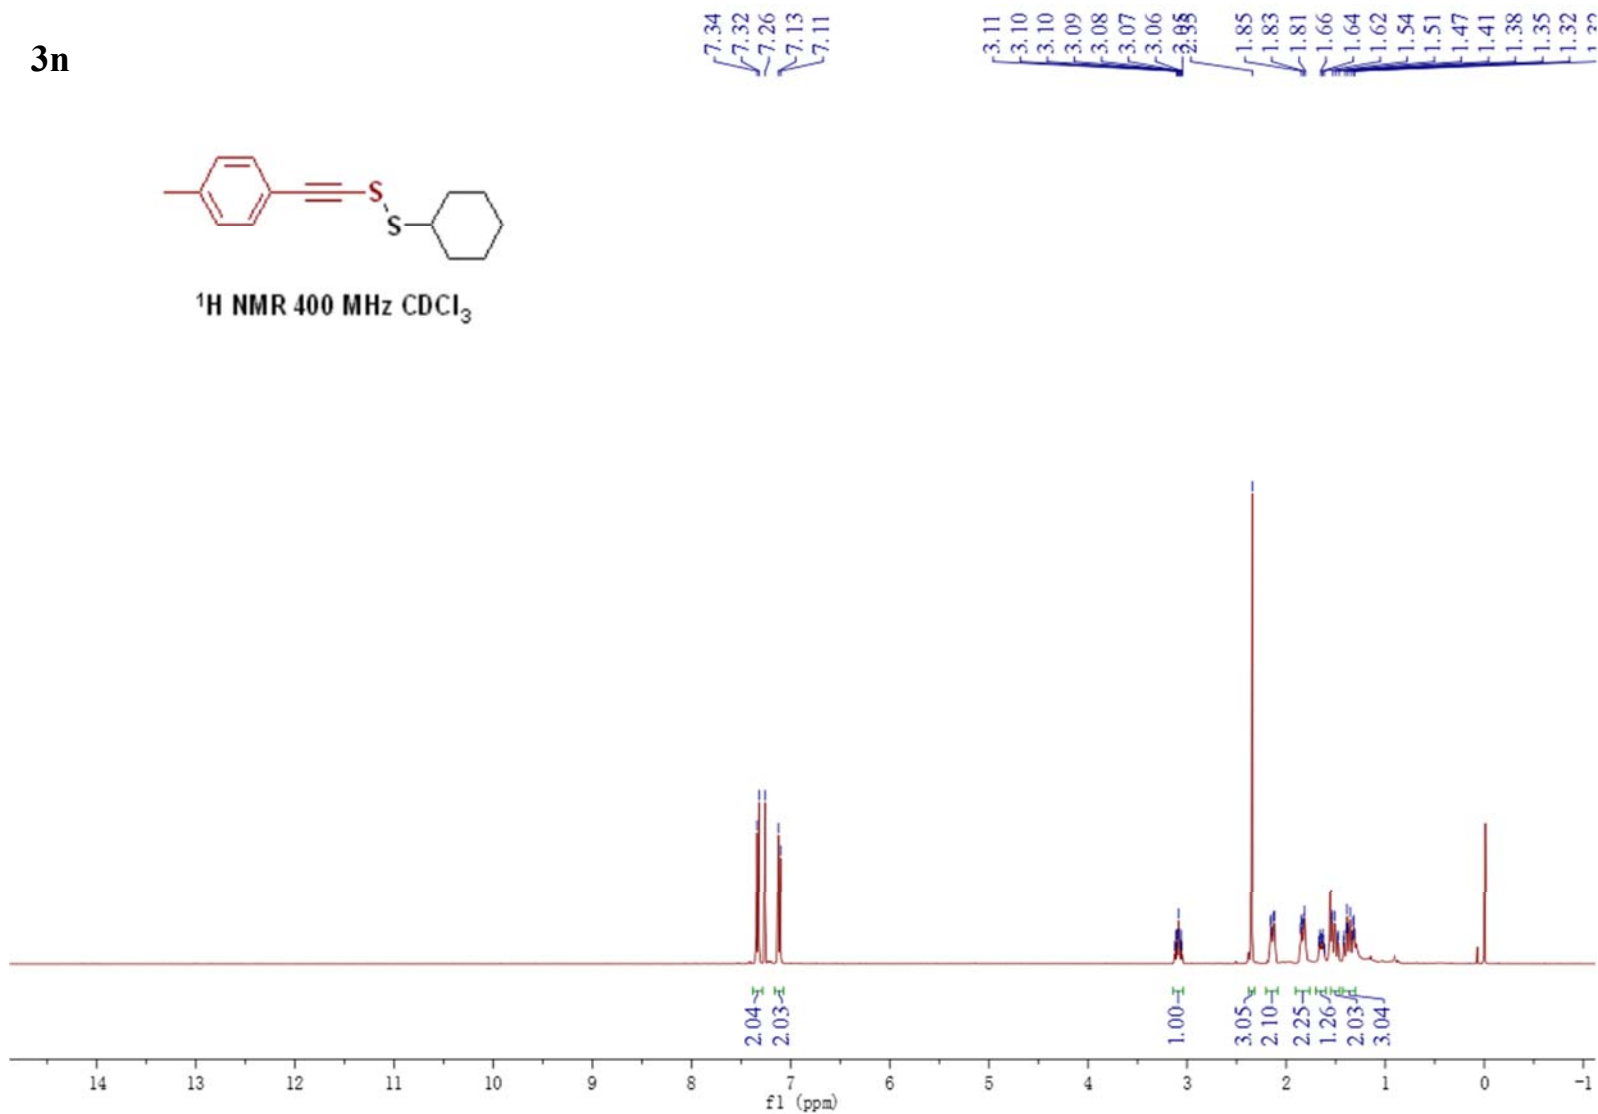

Copies of NMR spectra

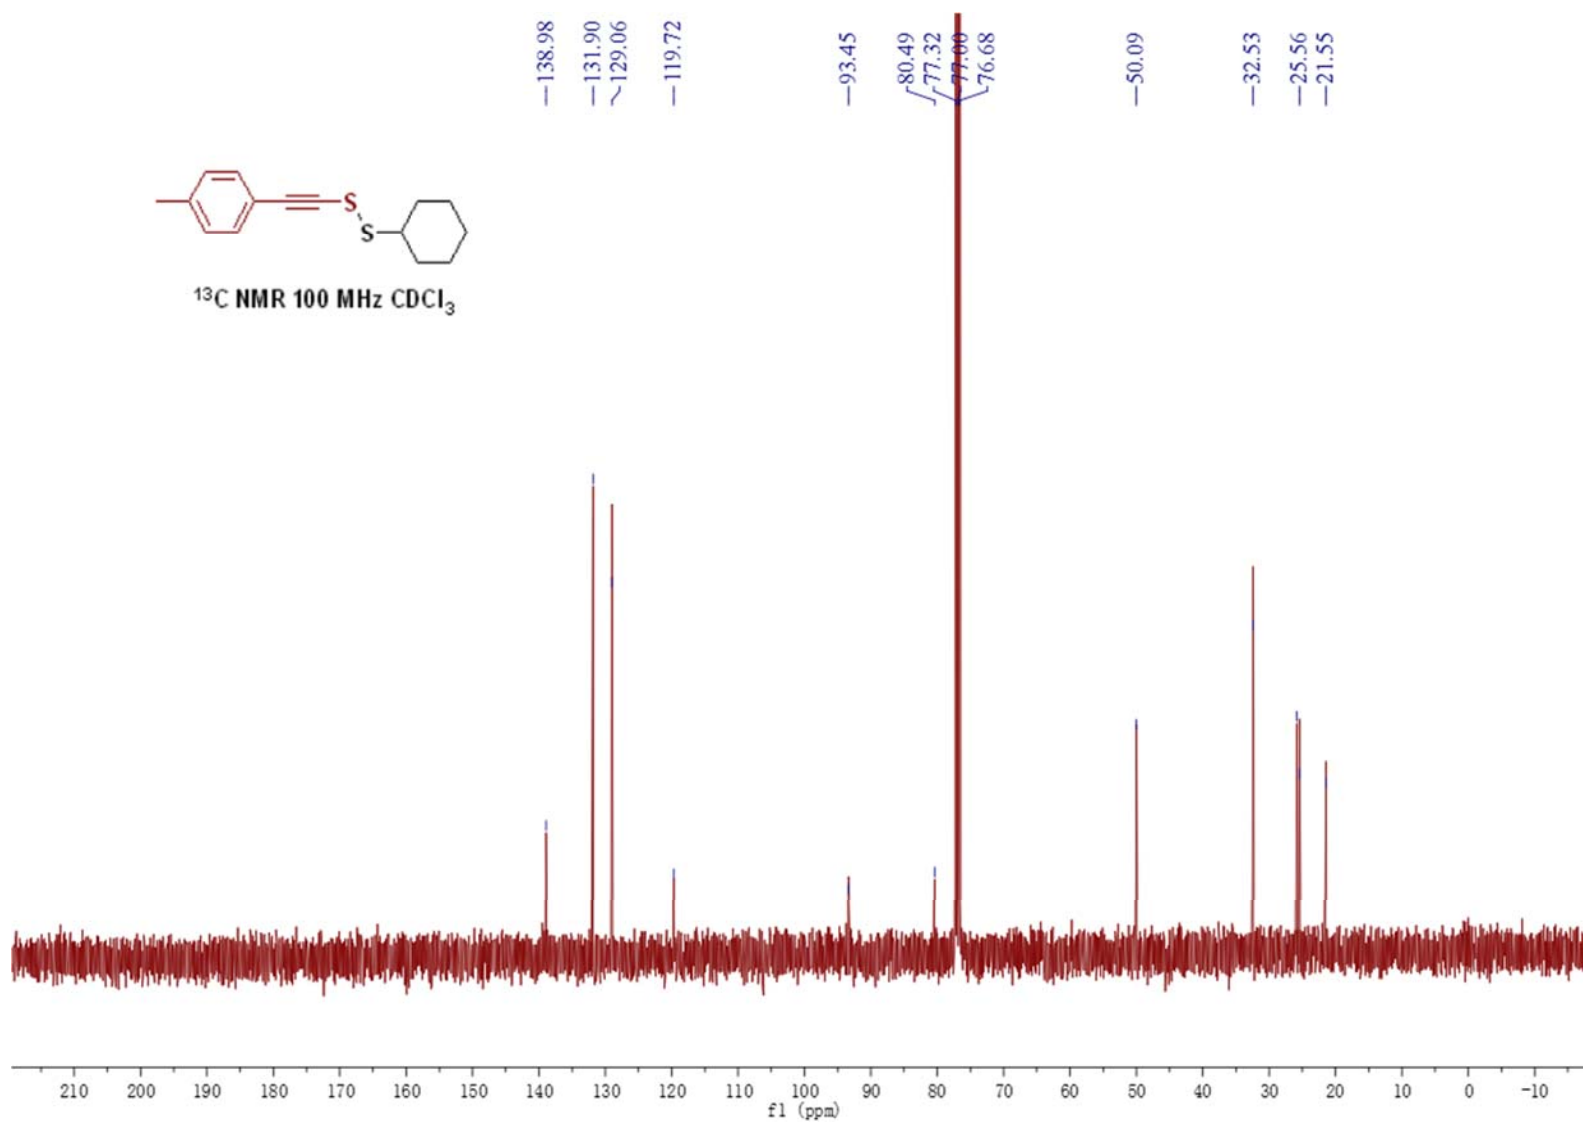

30

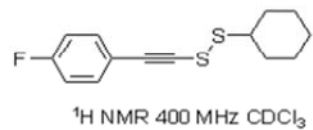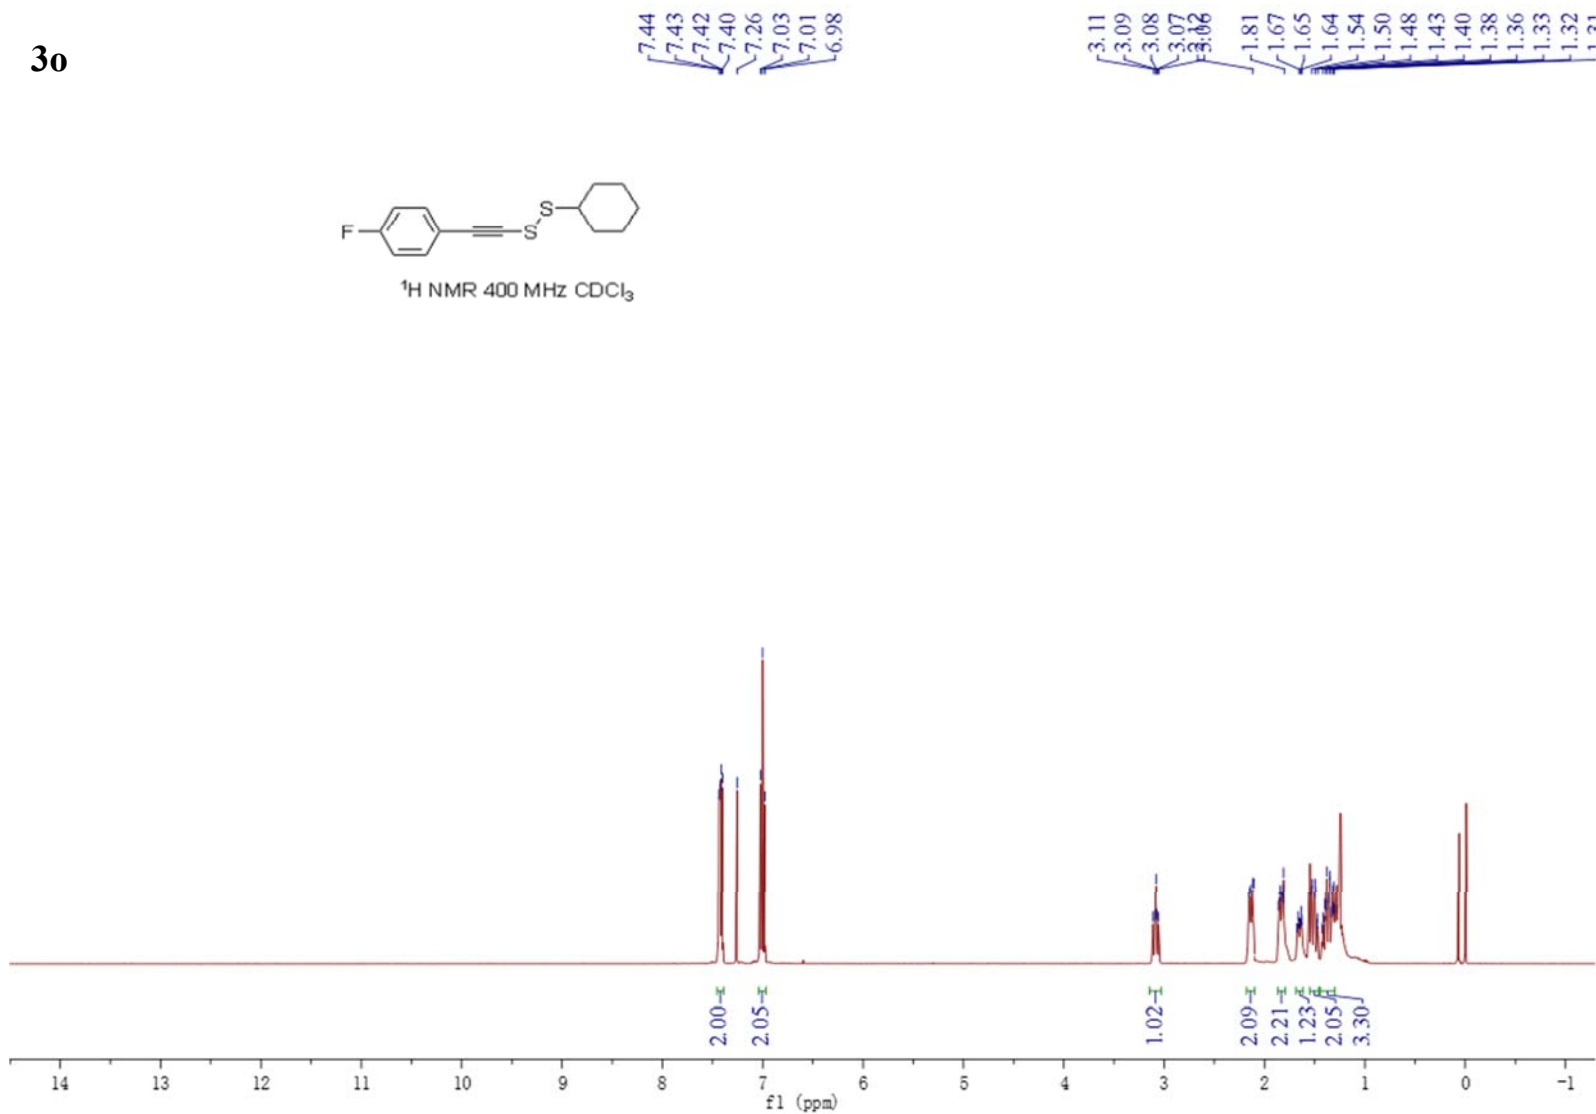



Copies of NMR spectra

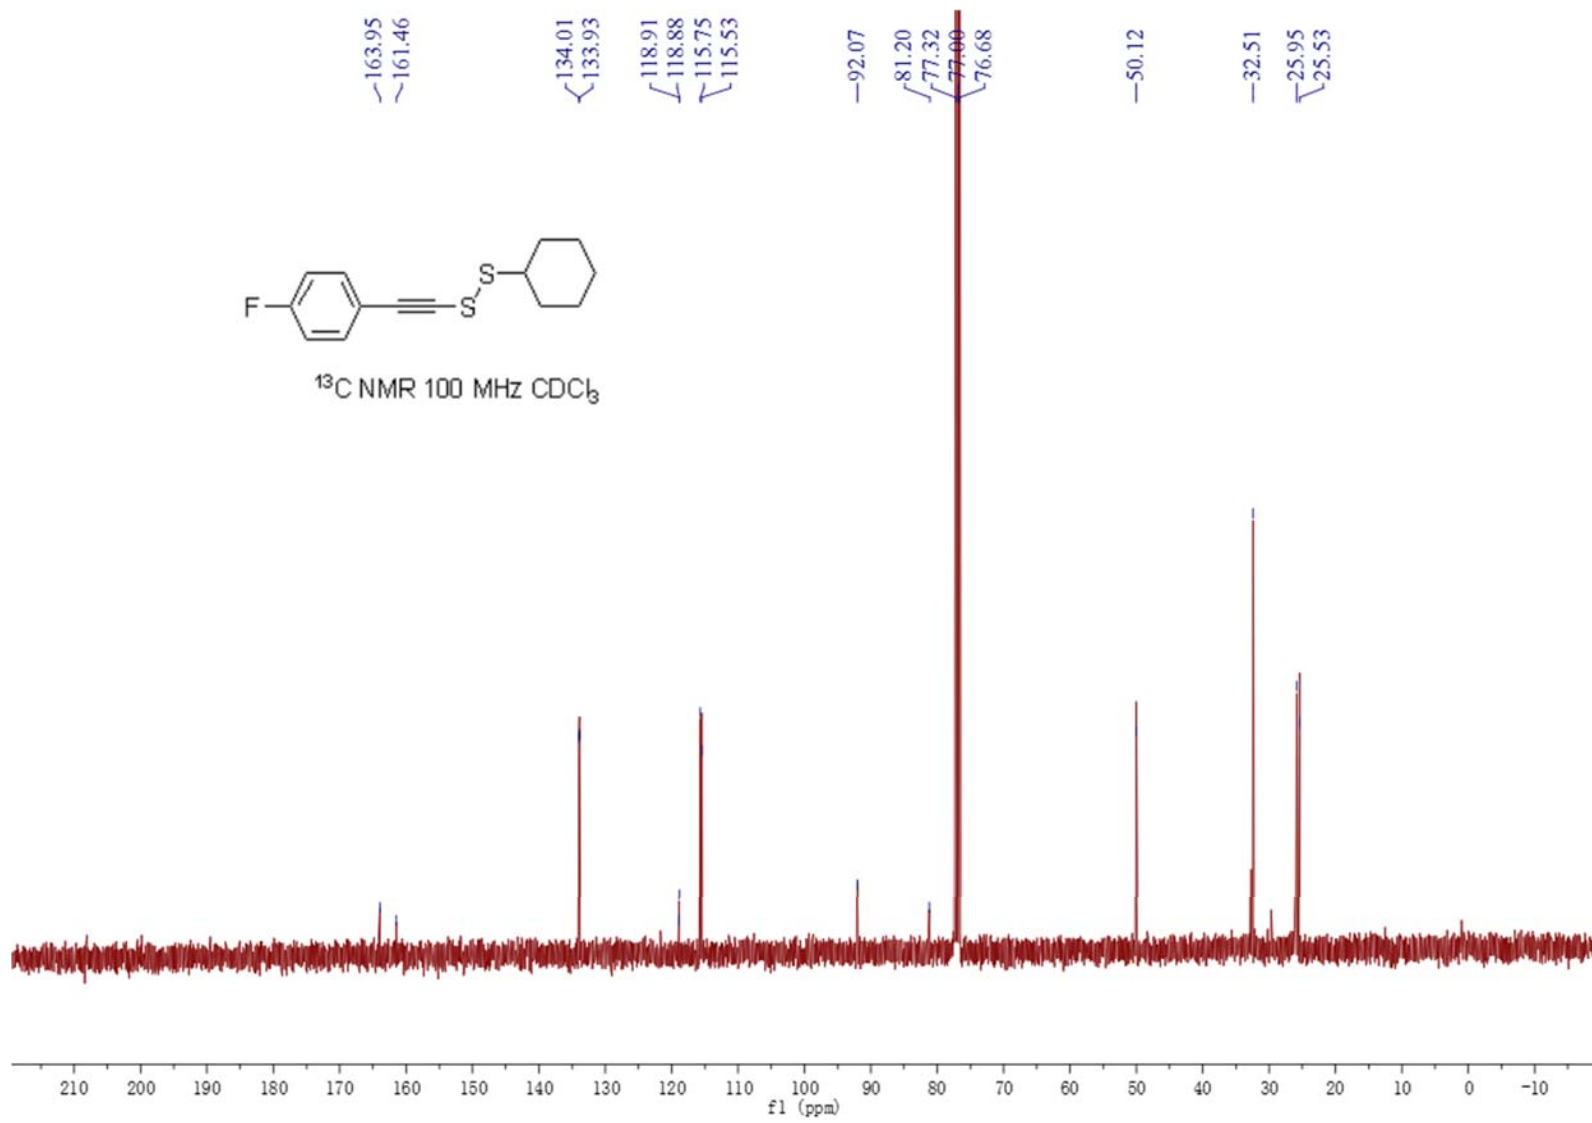

Copies of NMR spectra

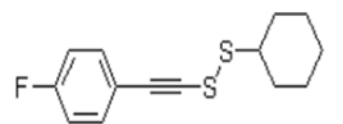

$^{19}\text{F}$  NMR 376.3 MHz  $\text{CDCl}_3$

-109.84

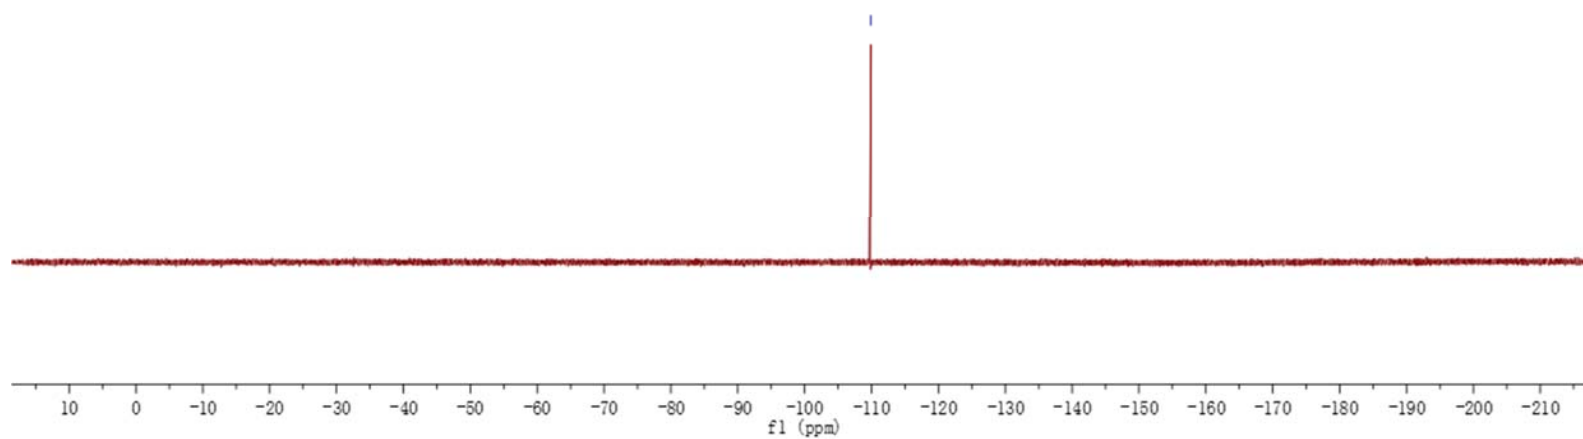

3p

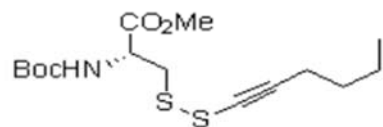

<sup>1</sup>H NMR 400 MHz CDCl<sub>3</sub>

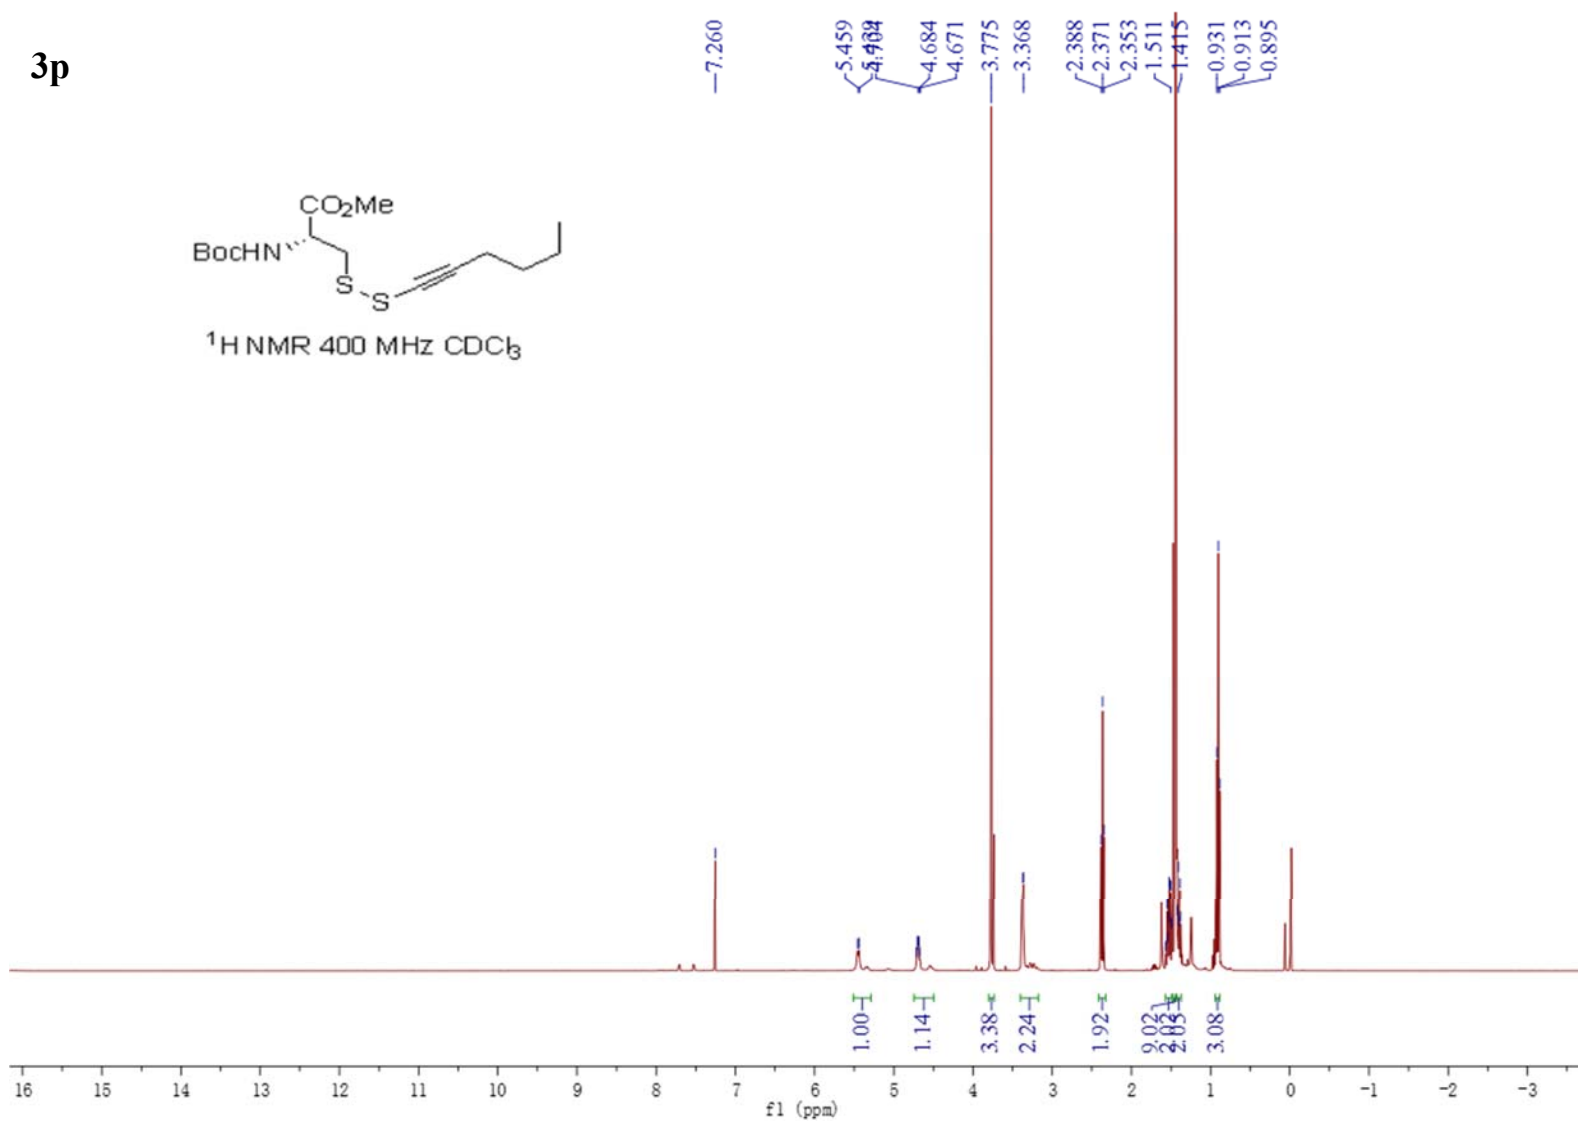

Copies of NMR spectra

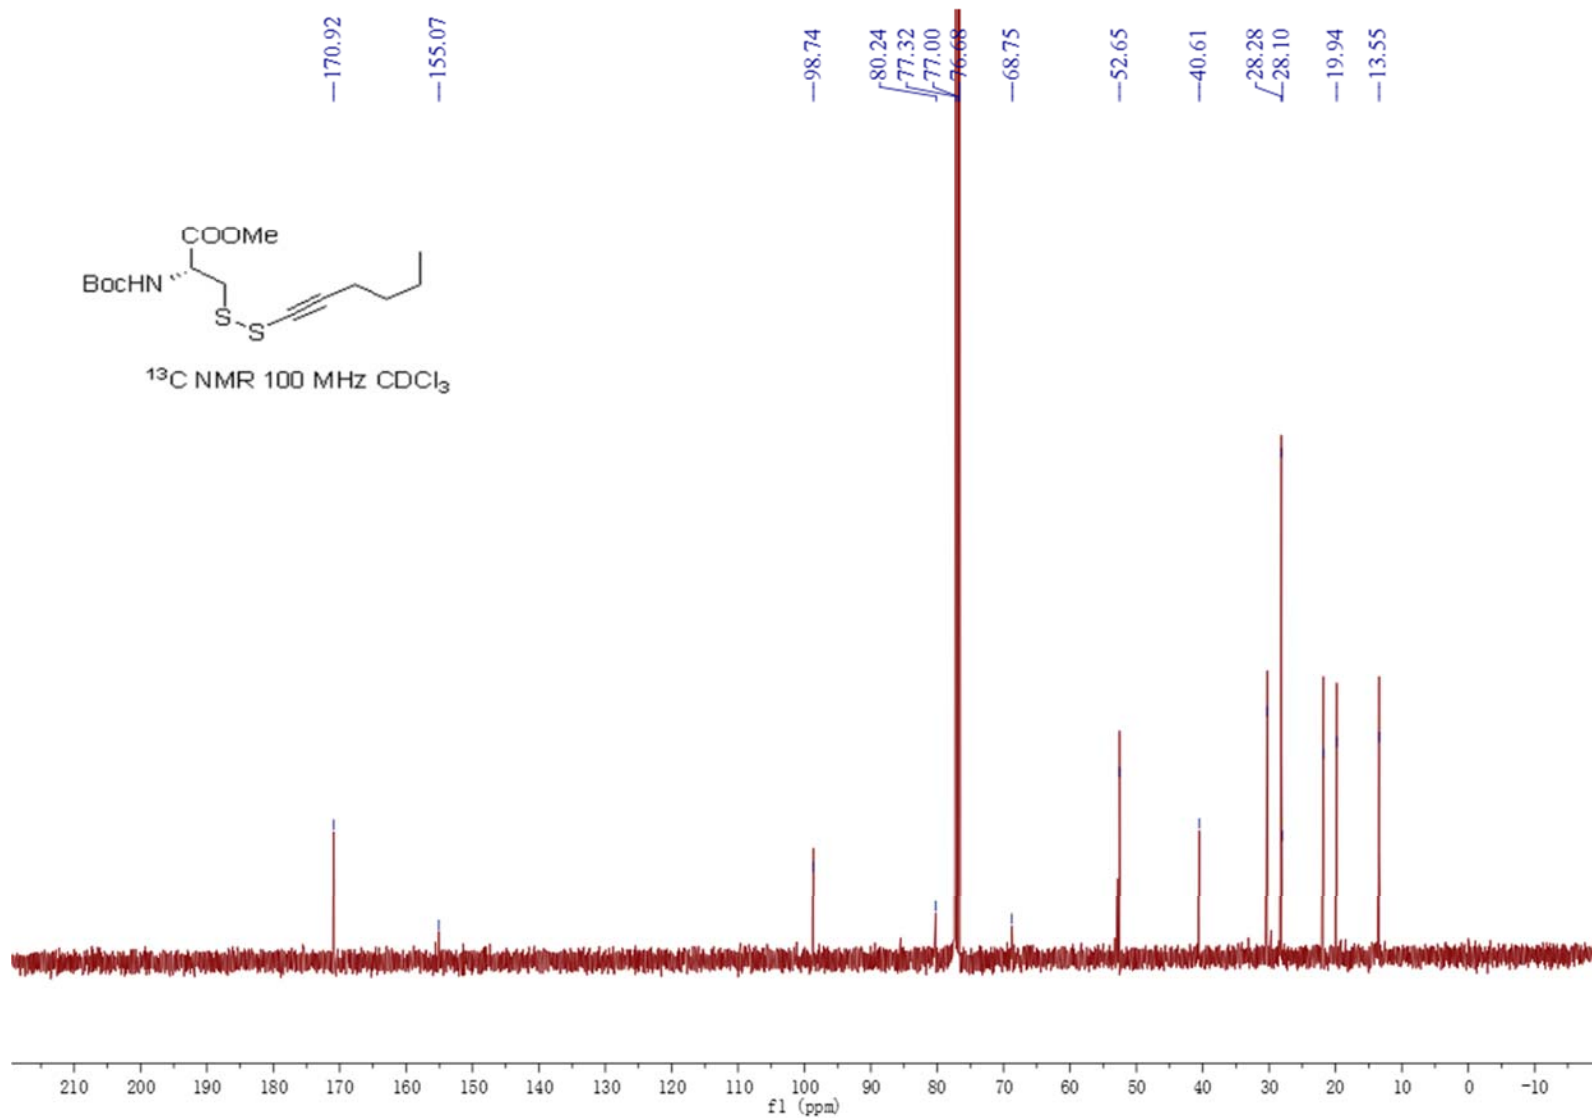

3q

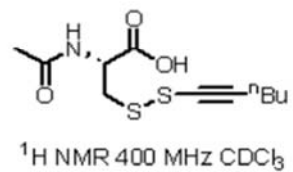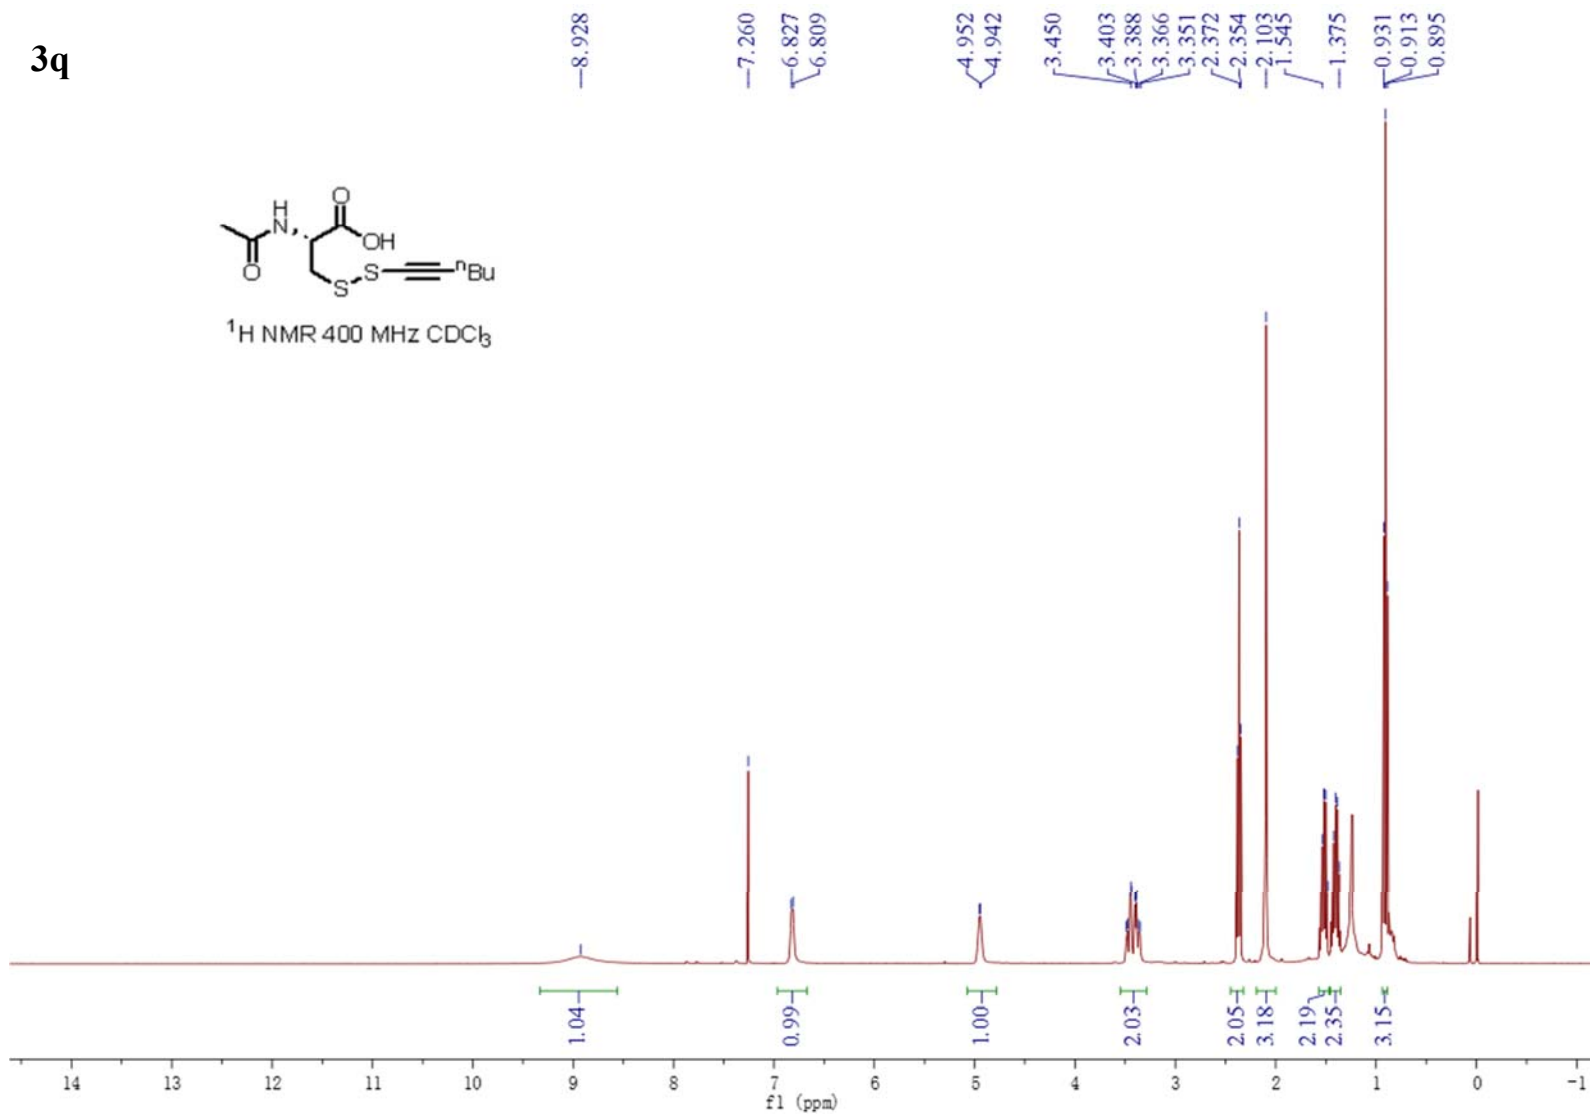

Copies of NMR spectra

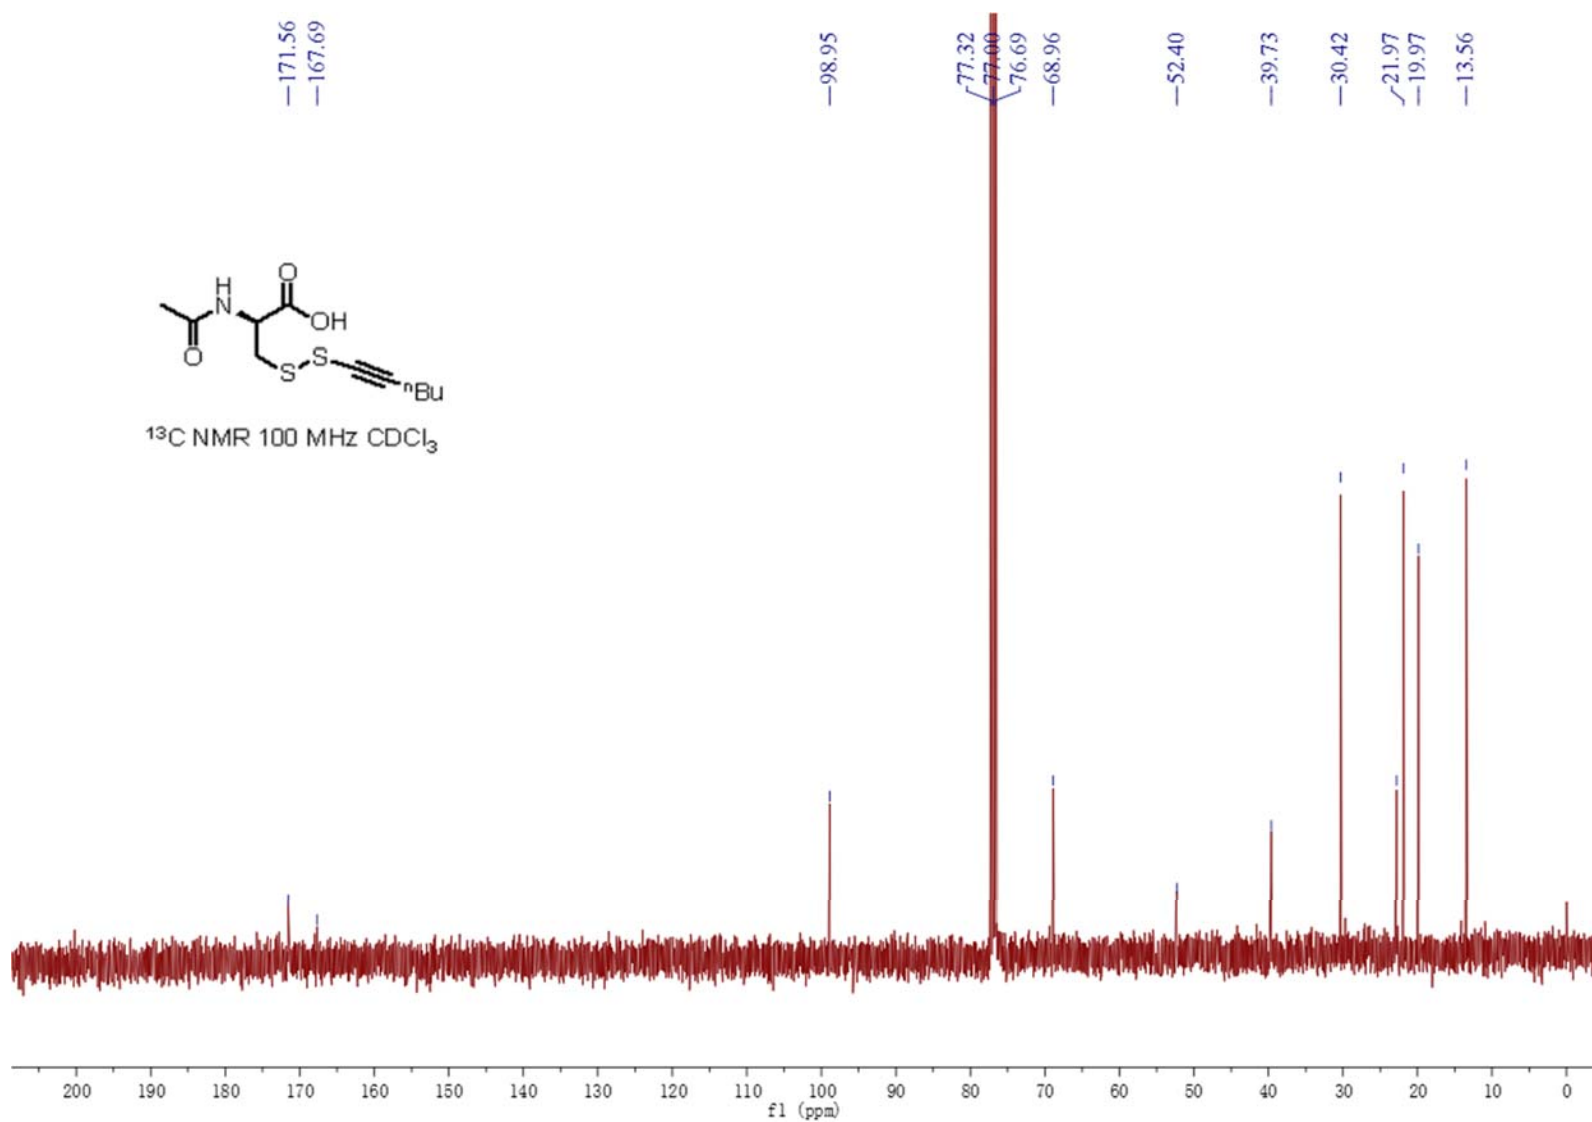

3r

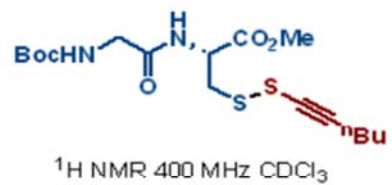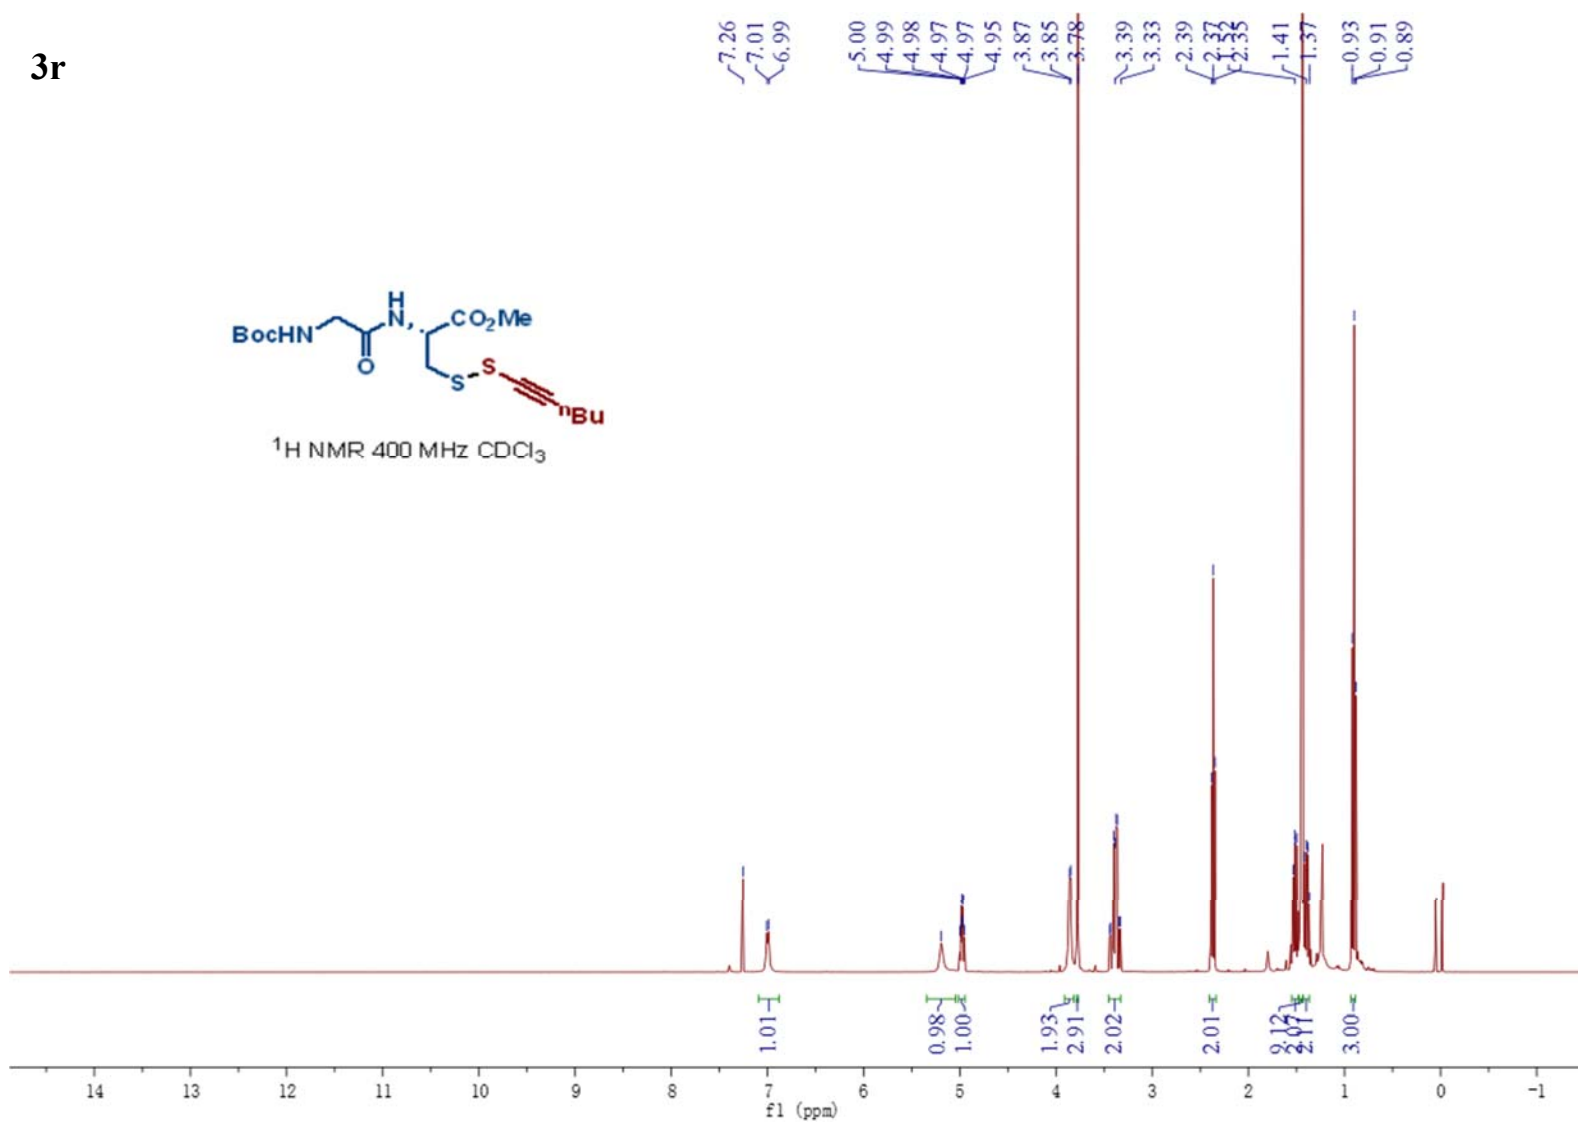

Copies of NMR spectra

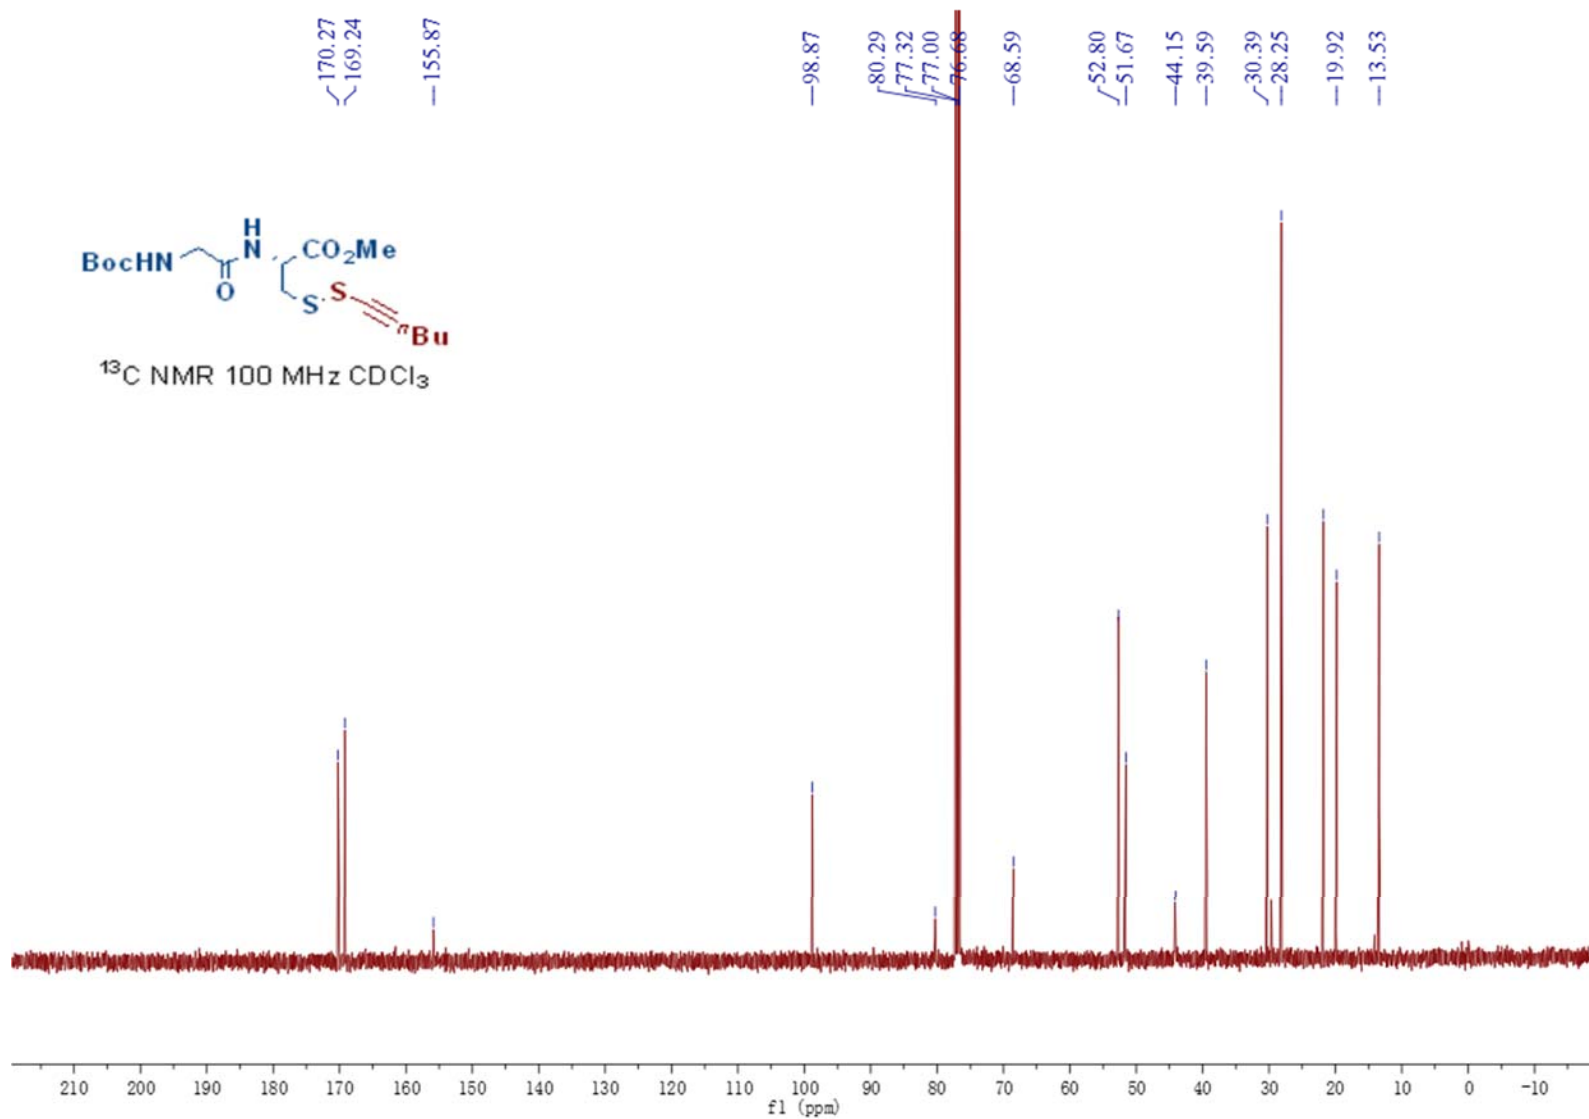



3s

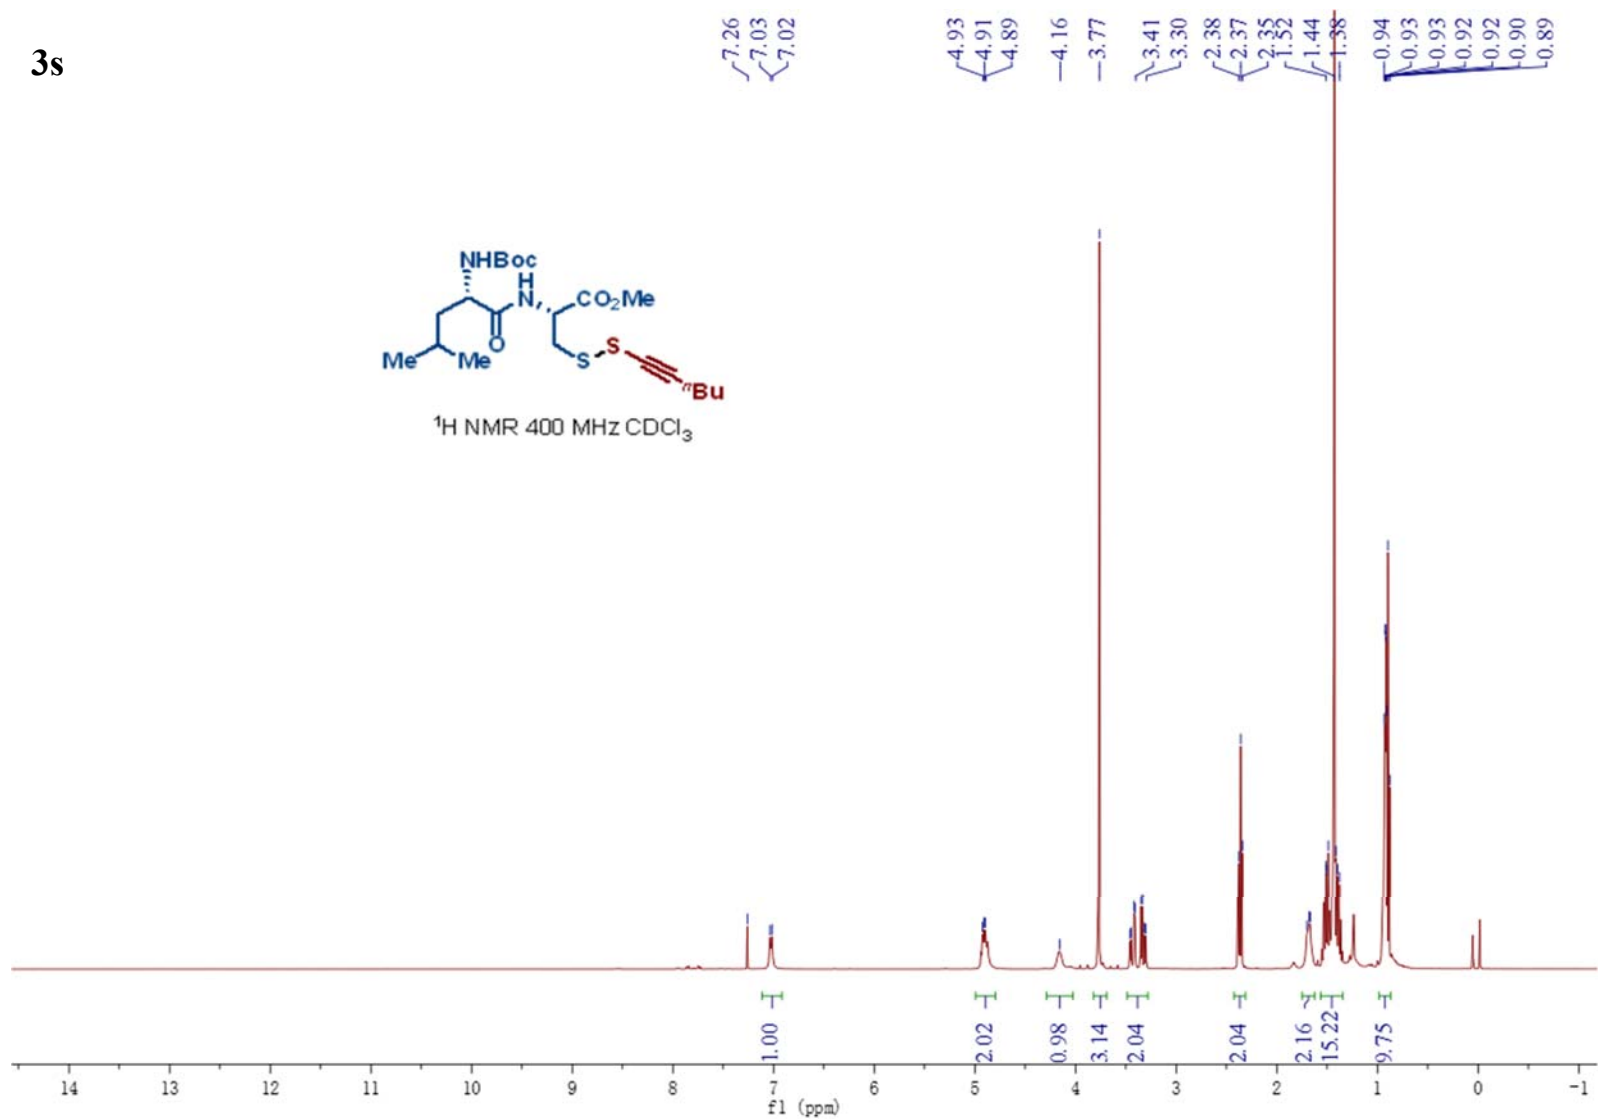

Copies of NMR spectra

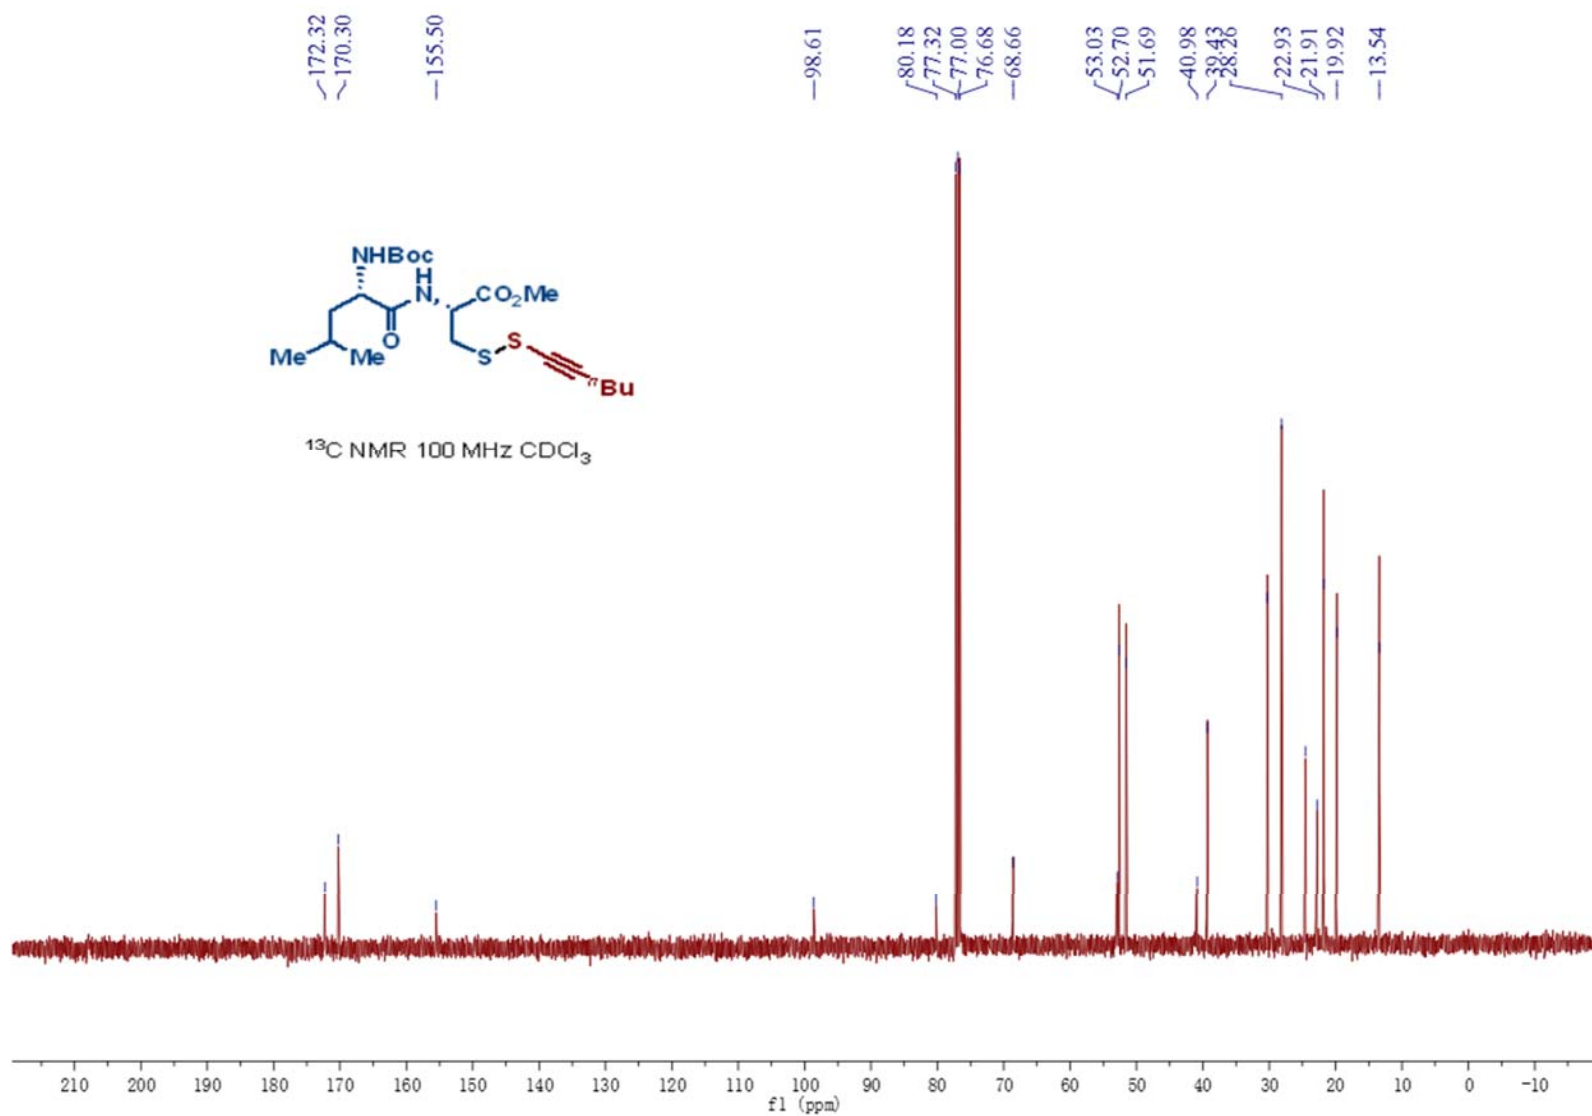

3t

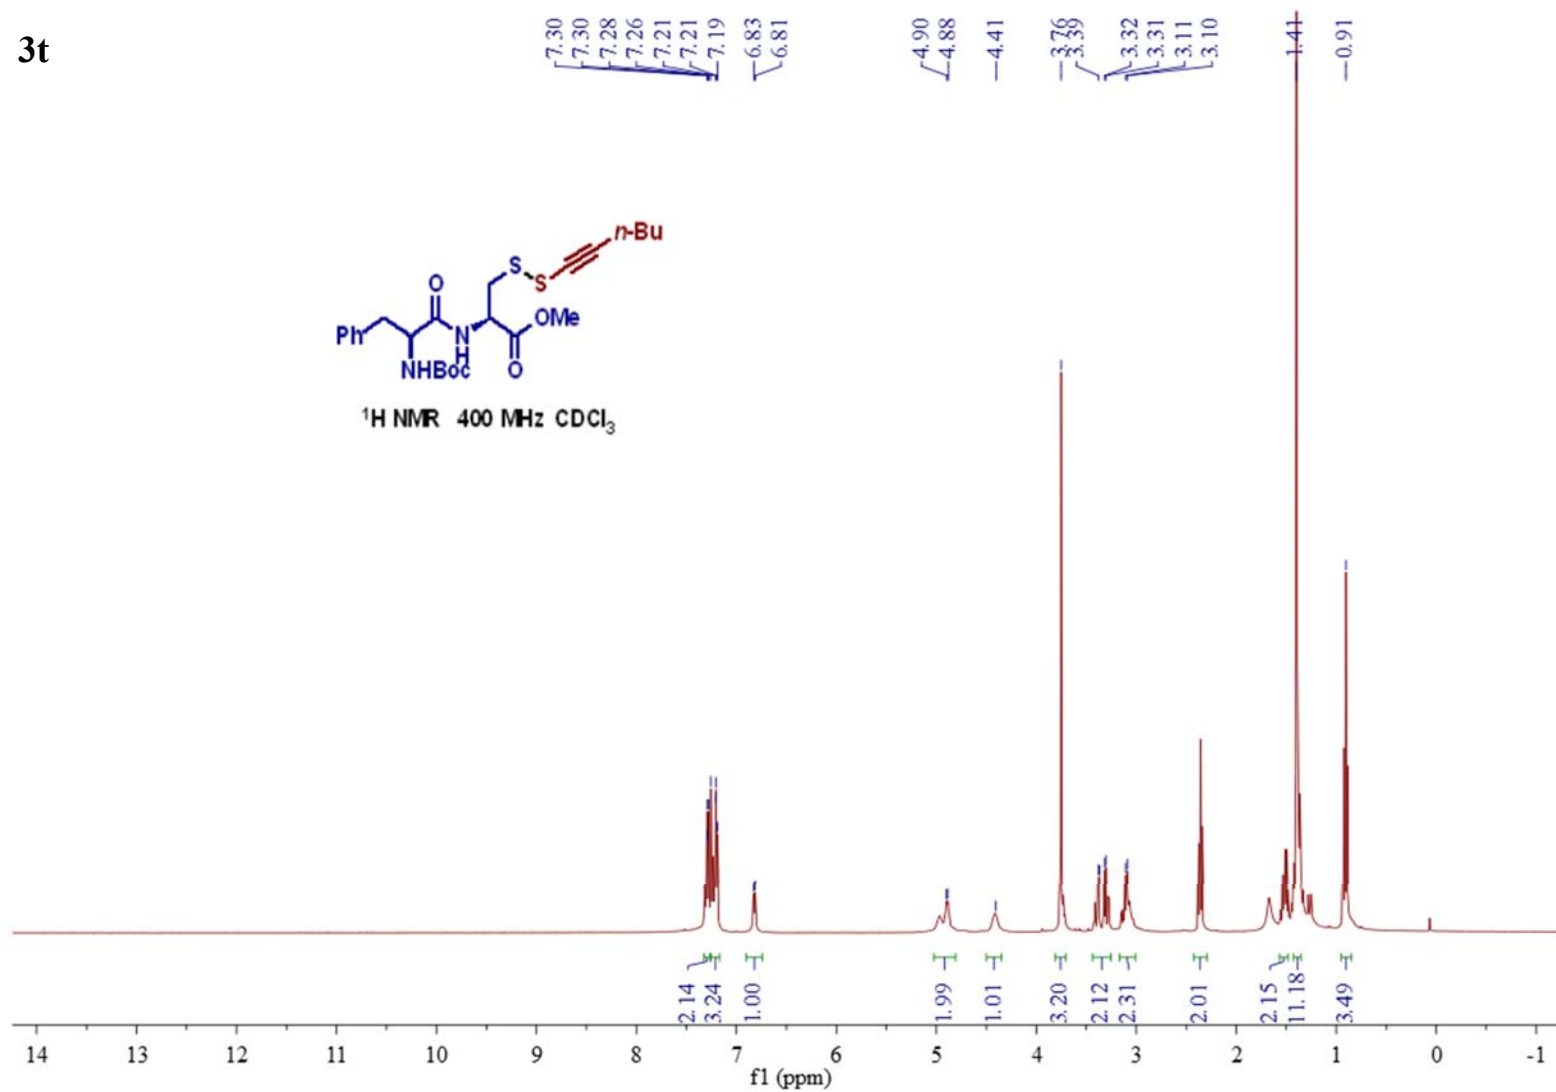

Copies of NMR spectra

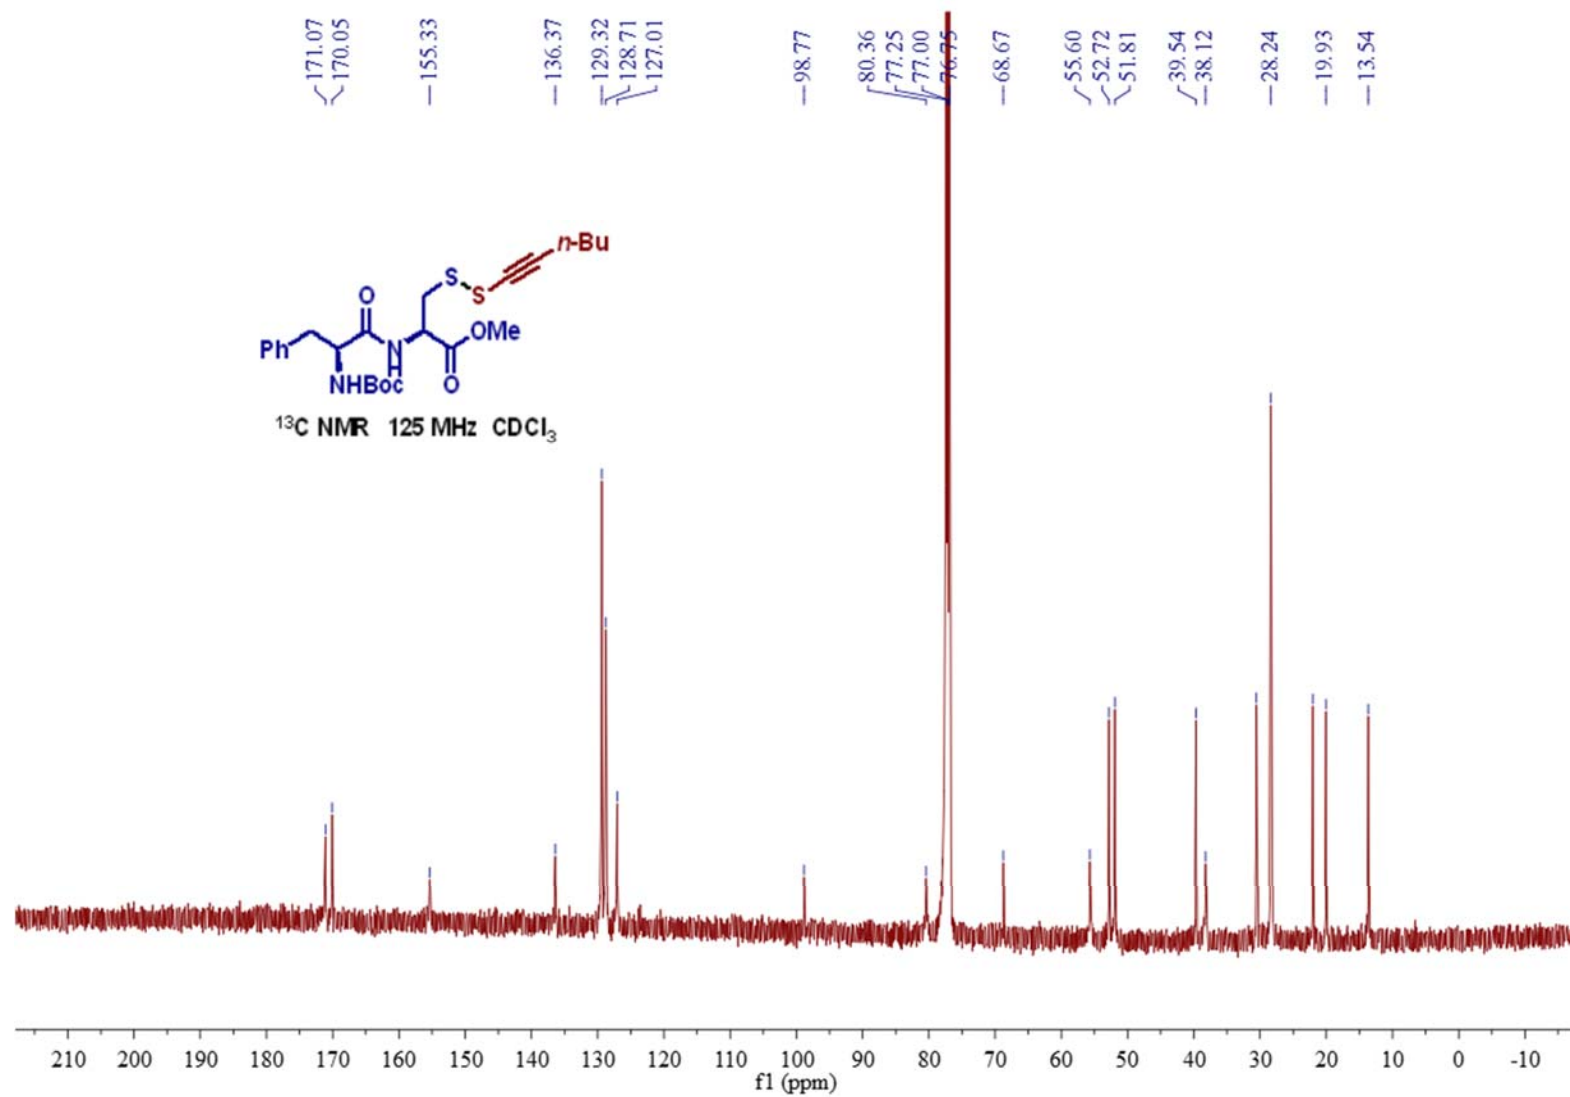

3u

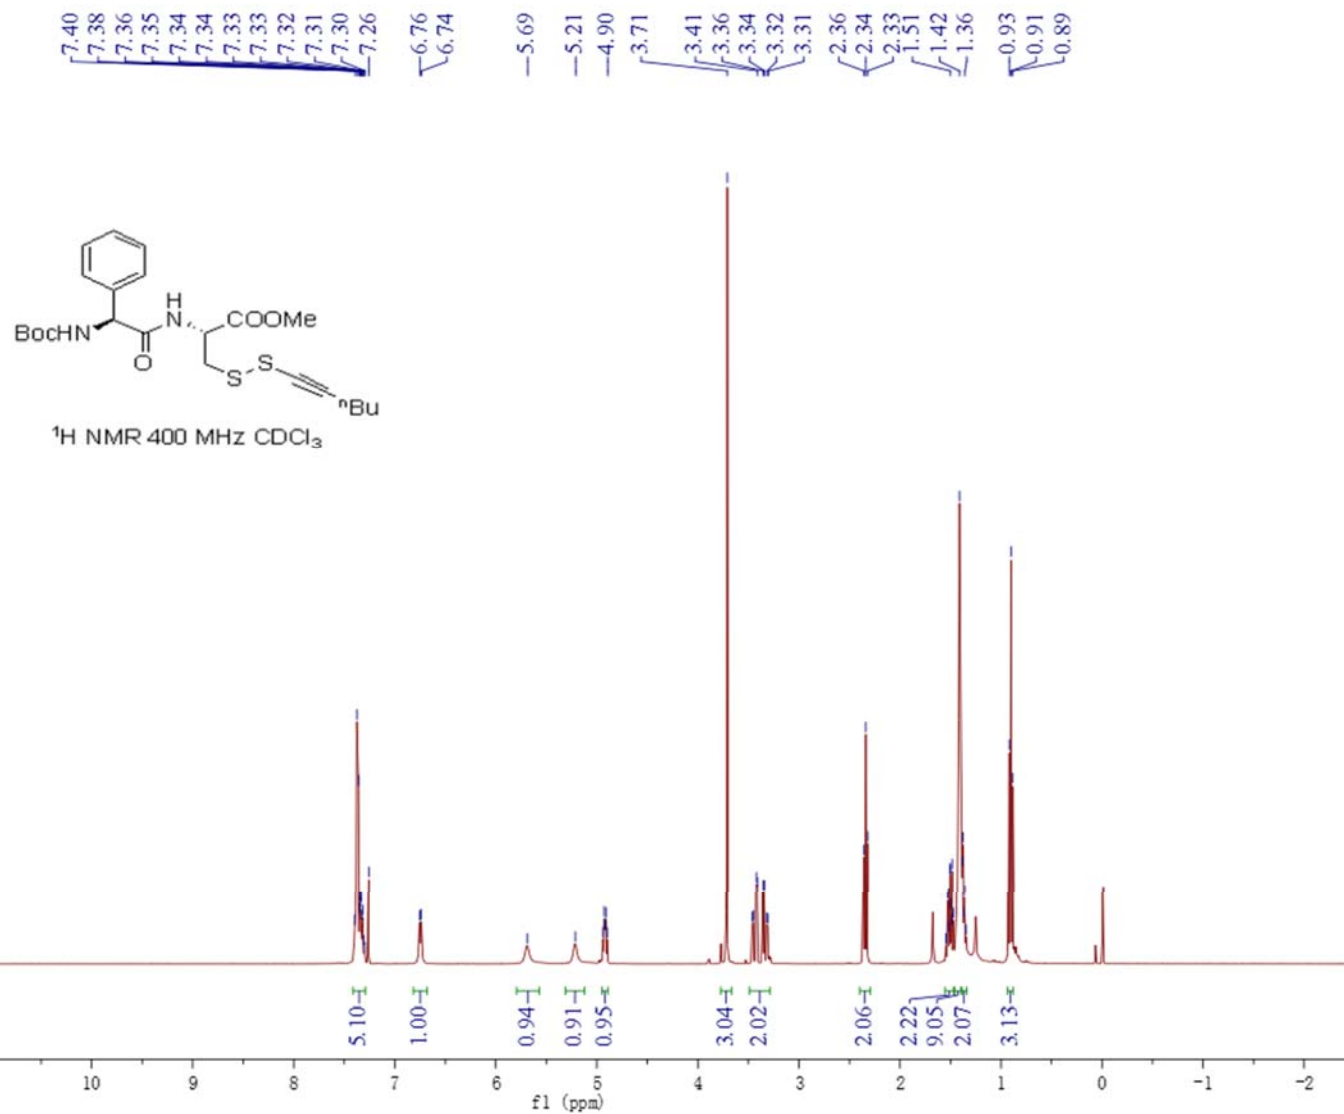

Copies of NMR spectra

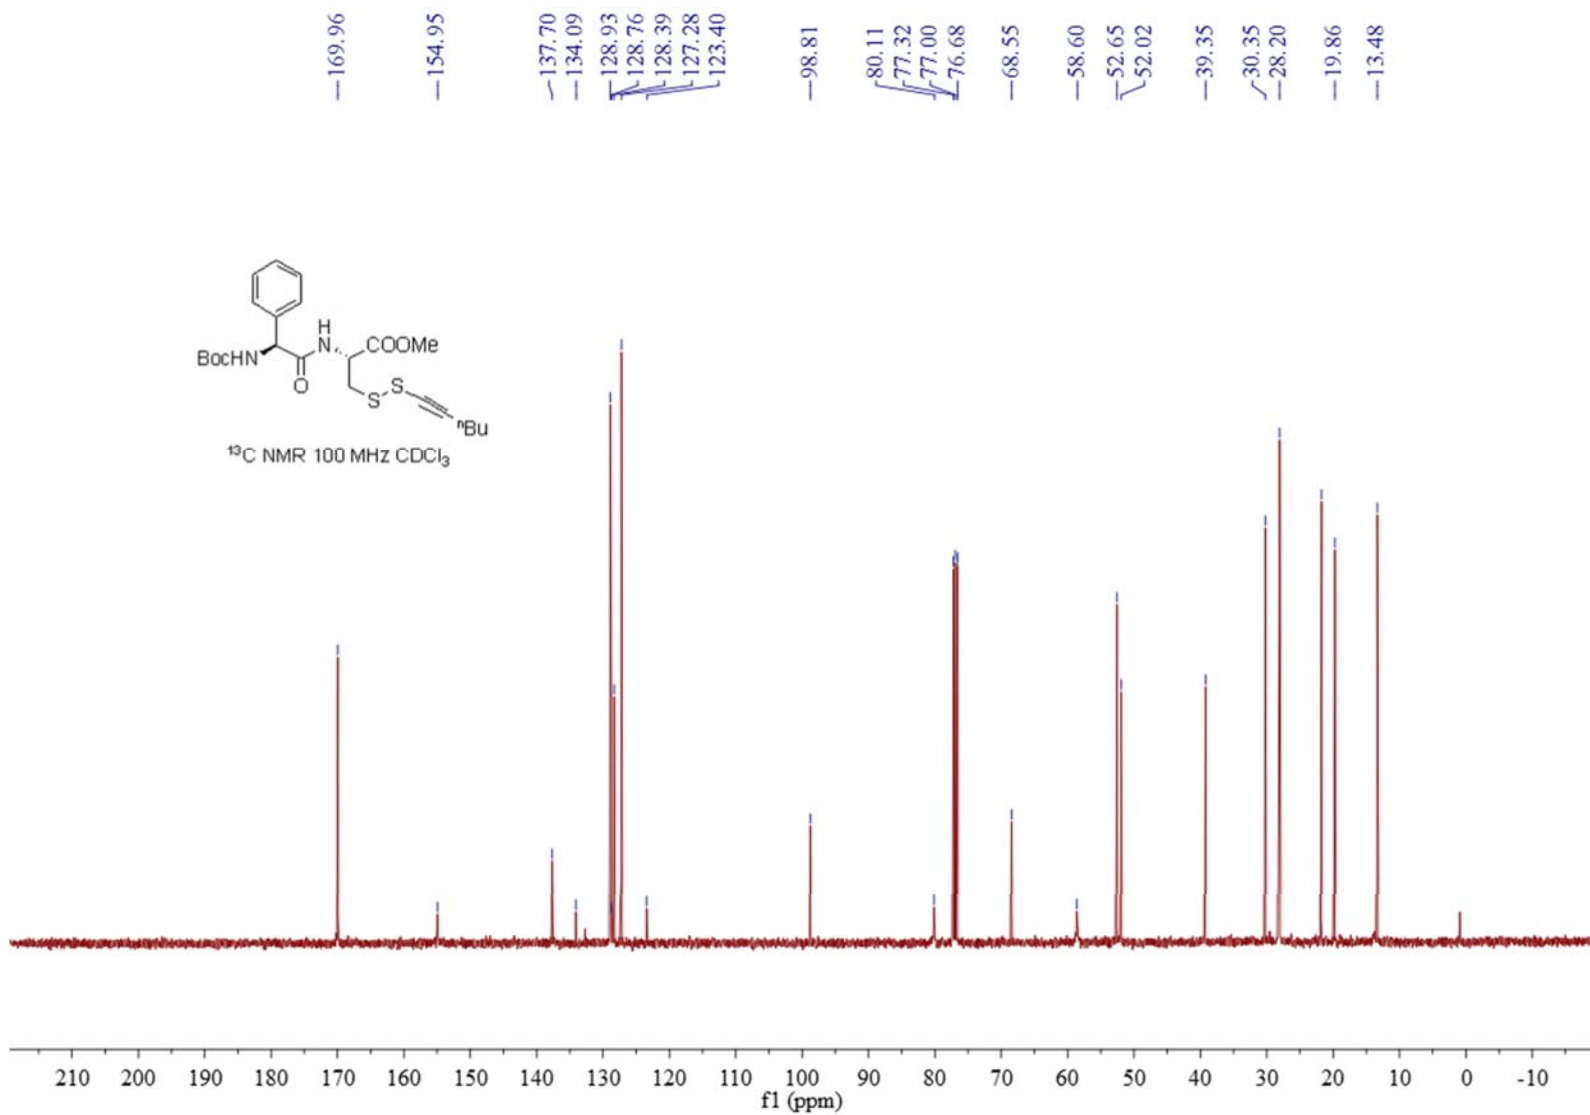

3v

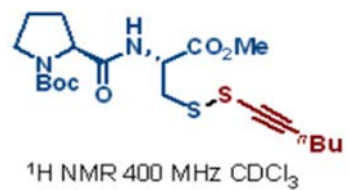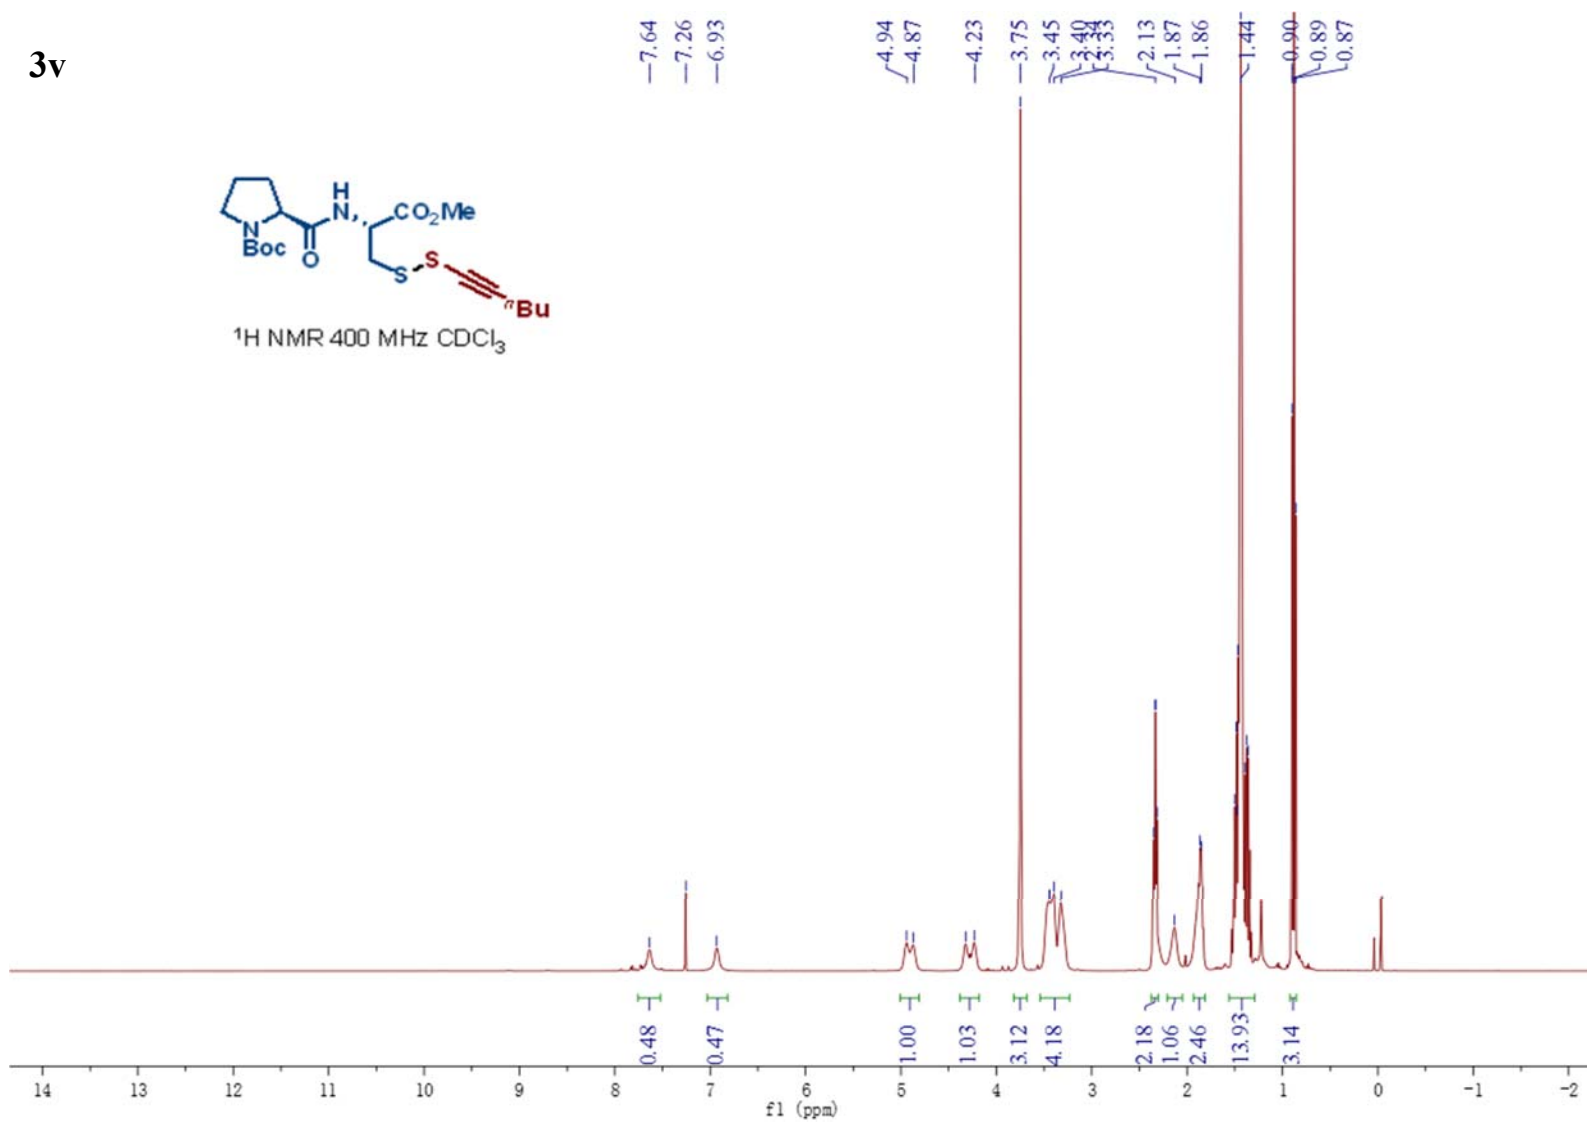

Copies of NMR spectra

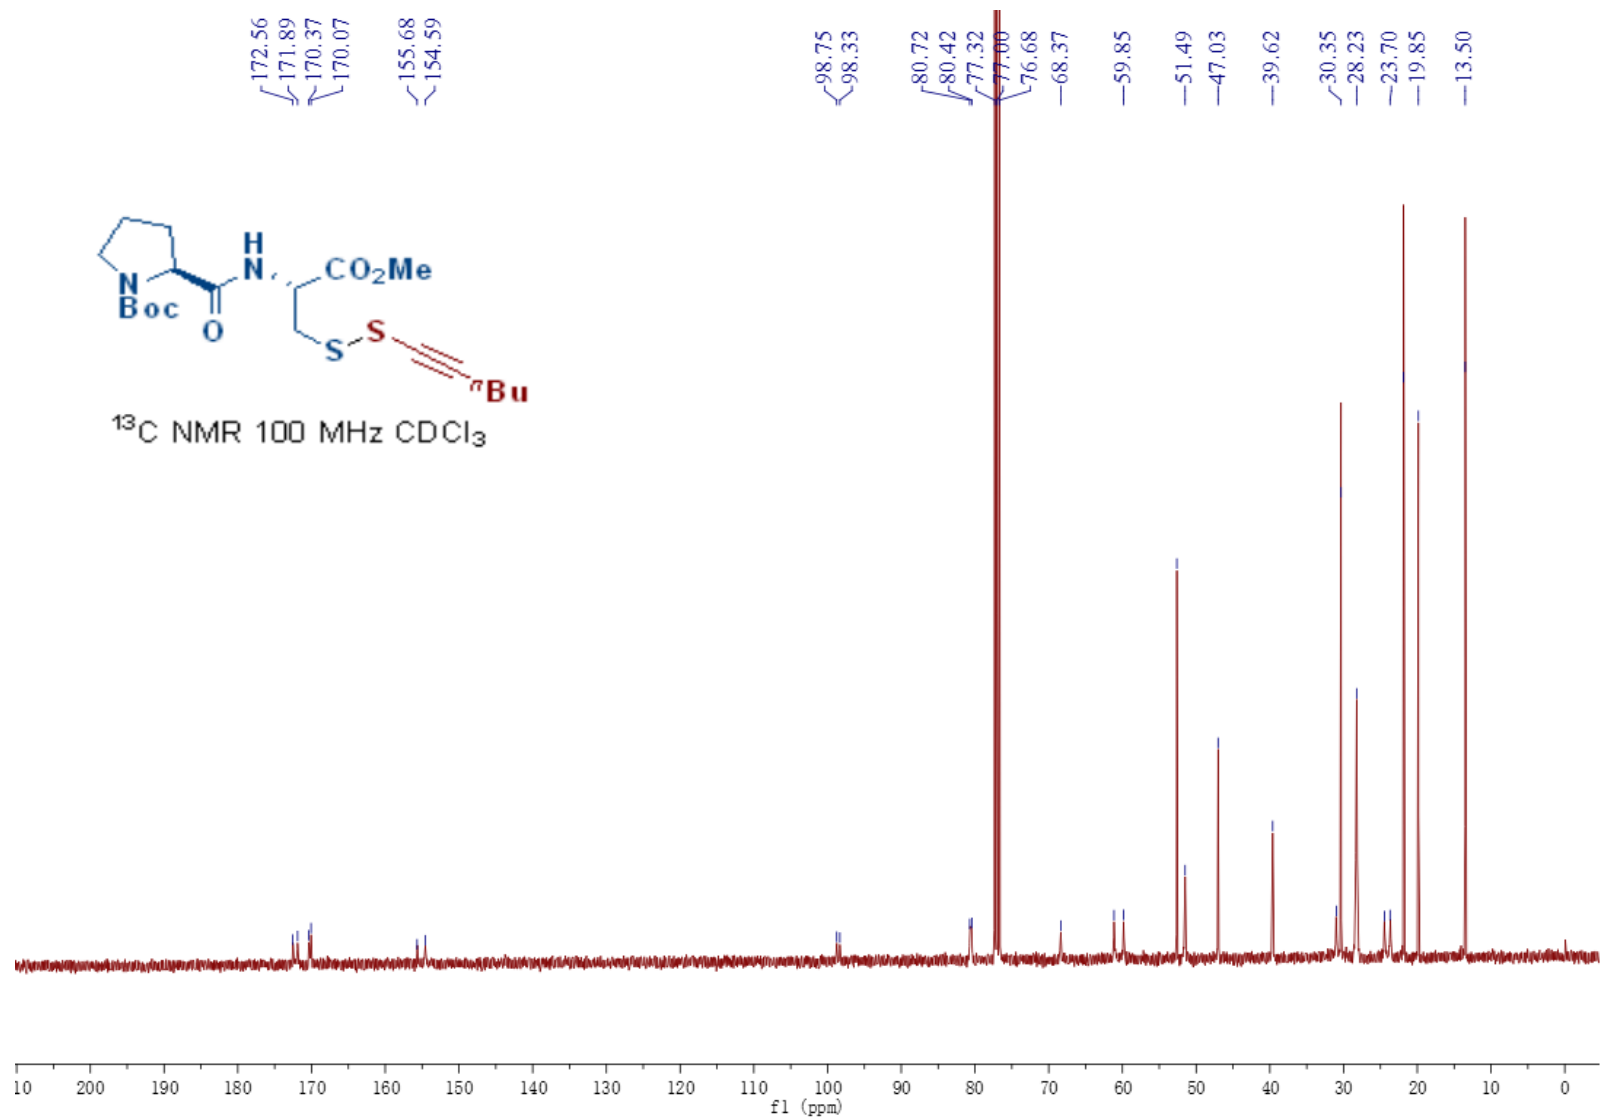



3y

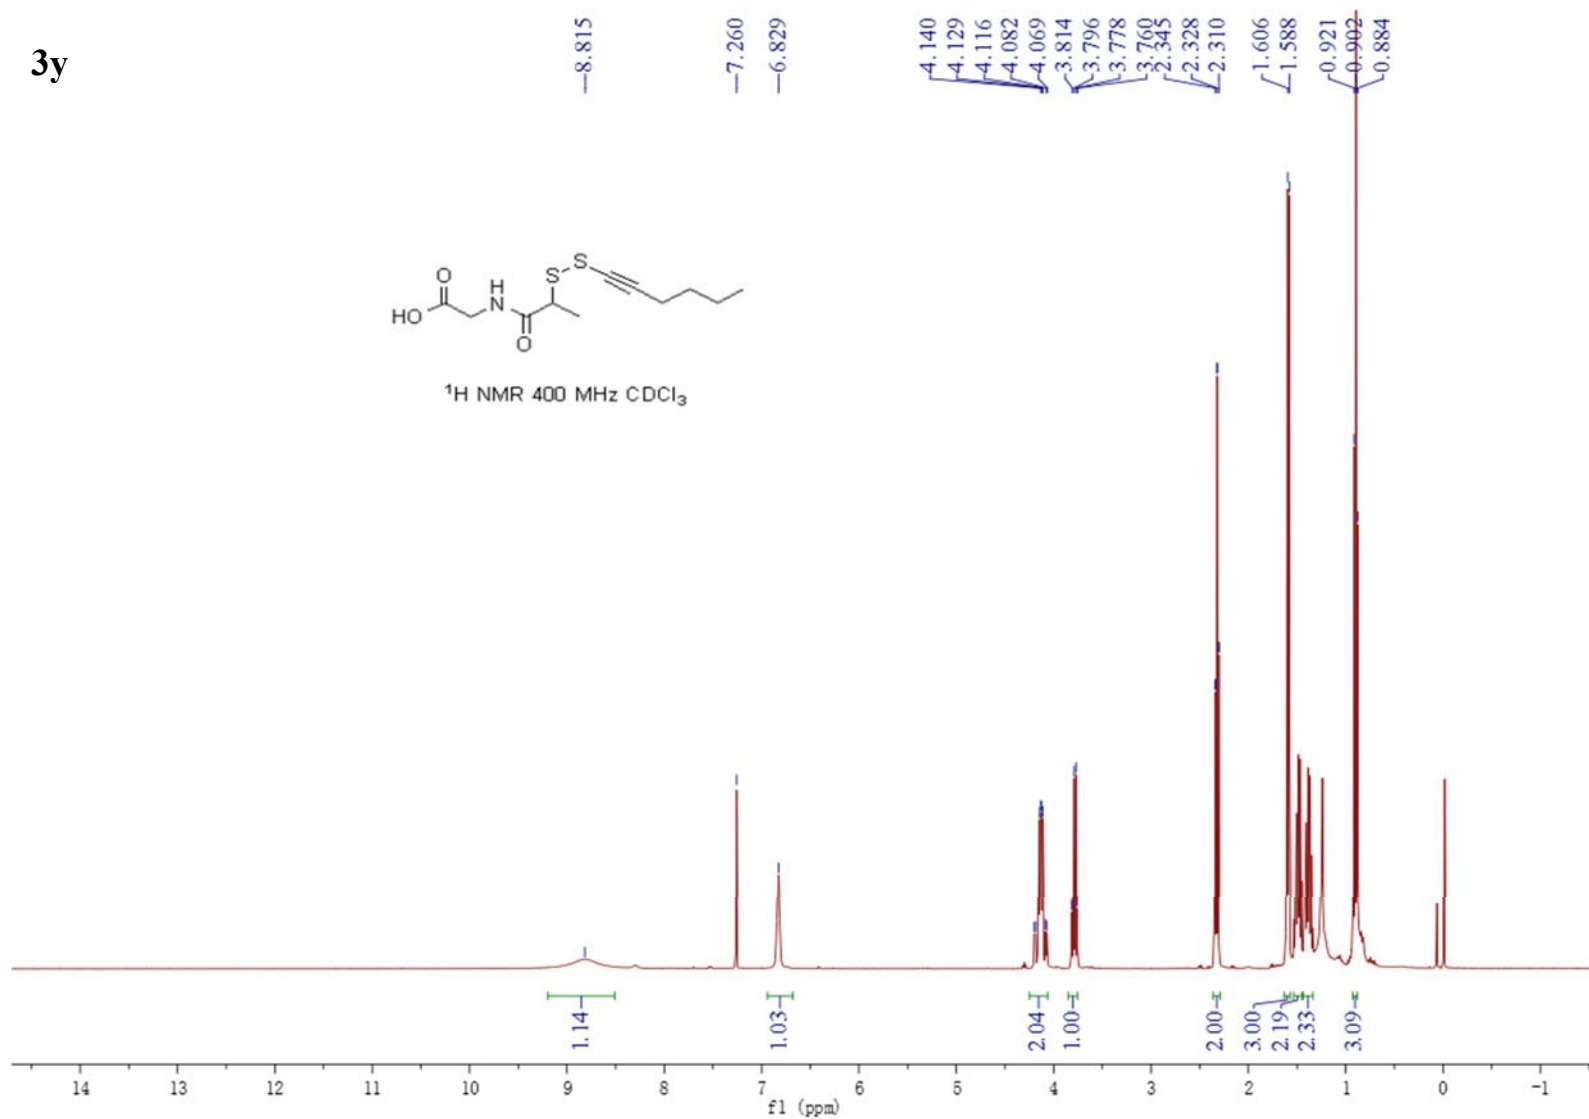

Copies of NMR spectra

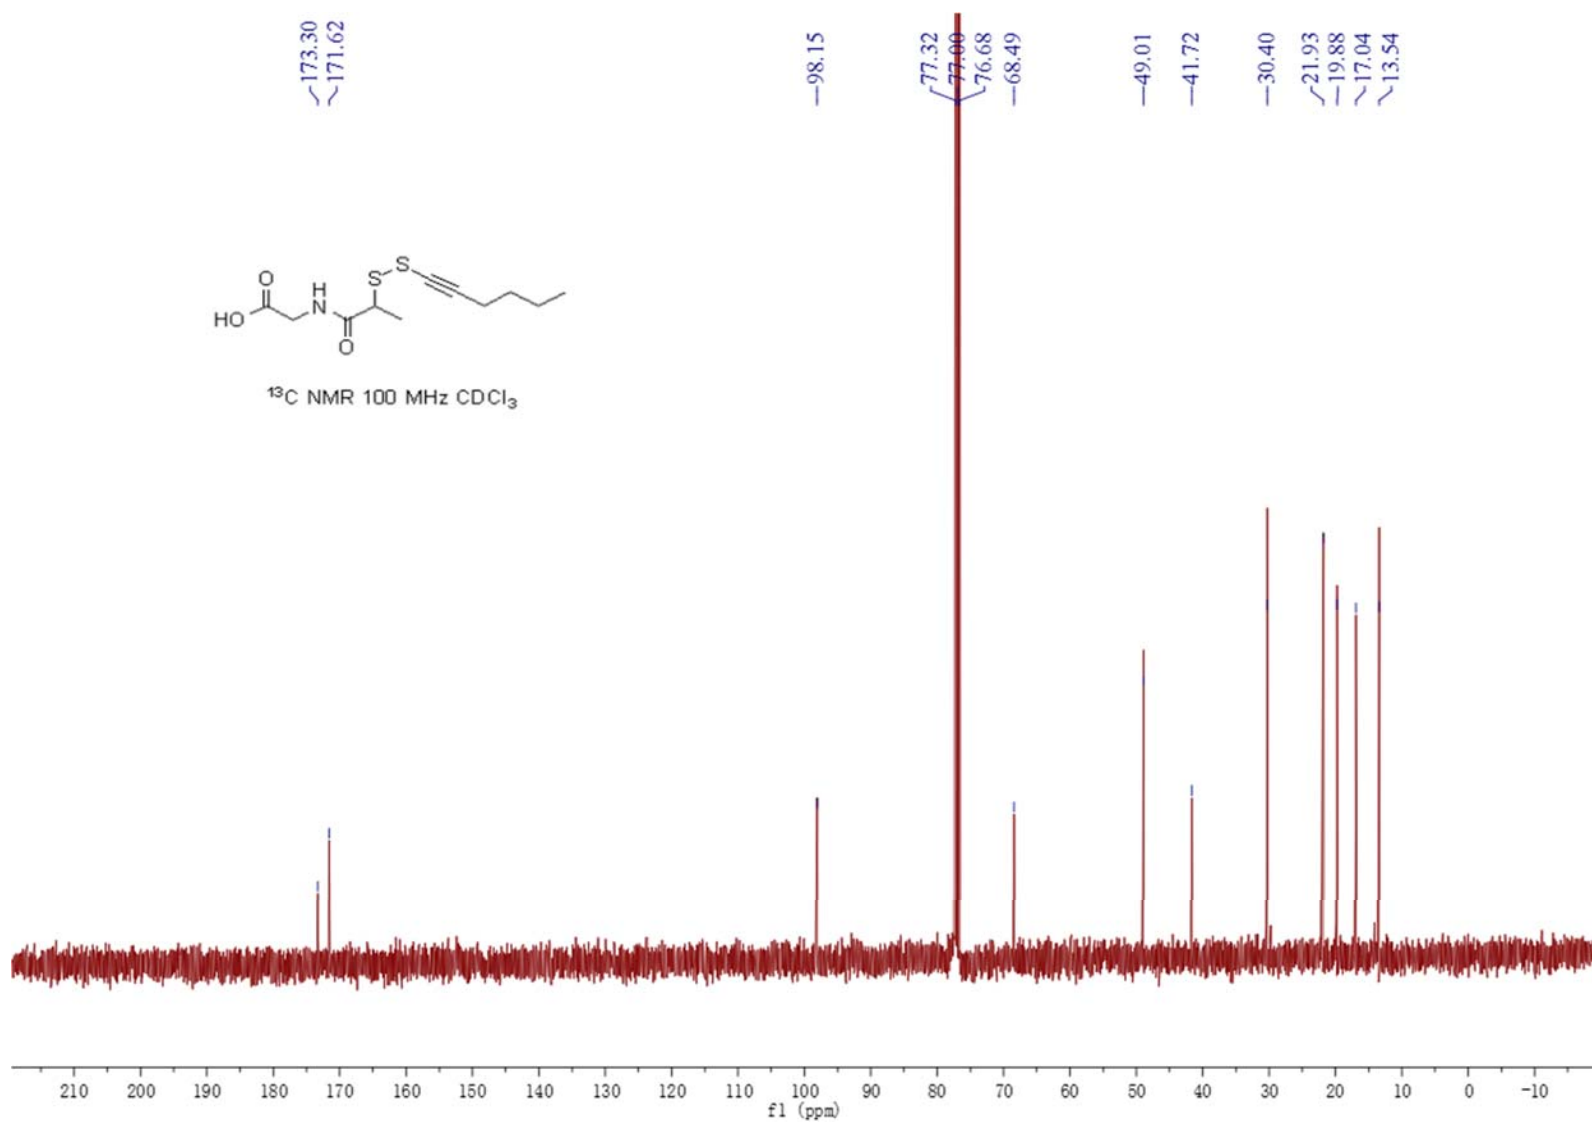

**3z**

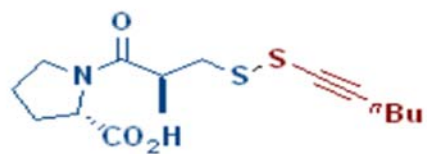

<sup>1</sup>H NMR 400 MHz CDCl<sub>3</sub>

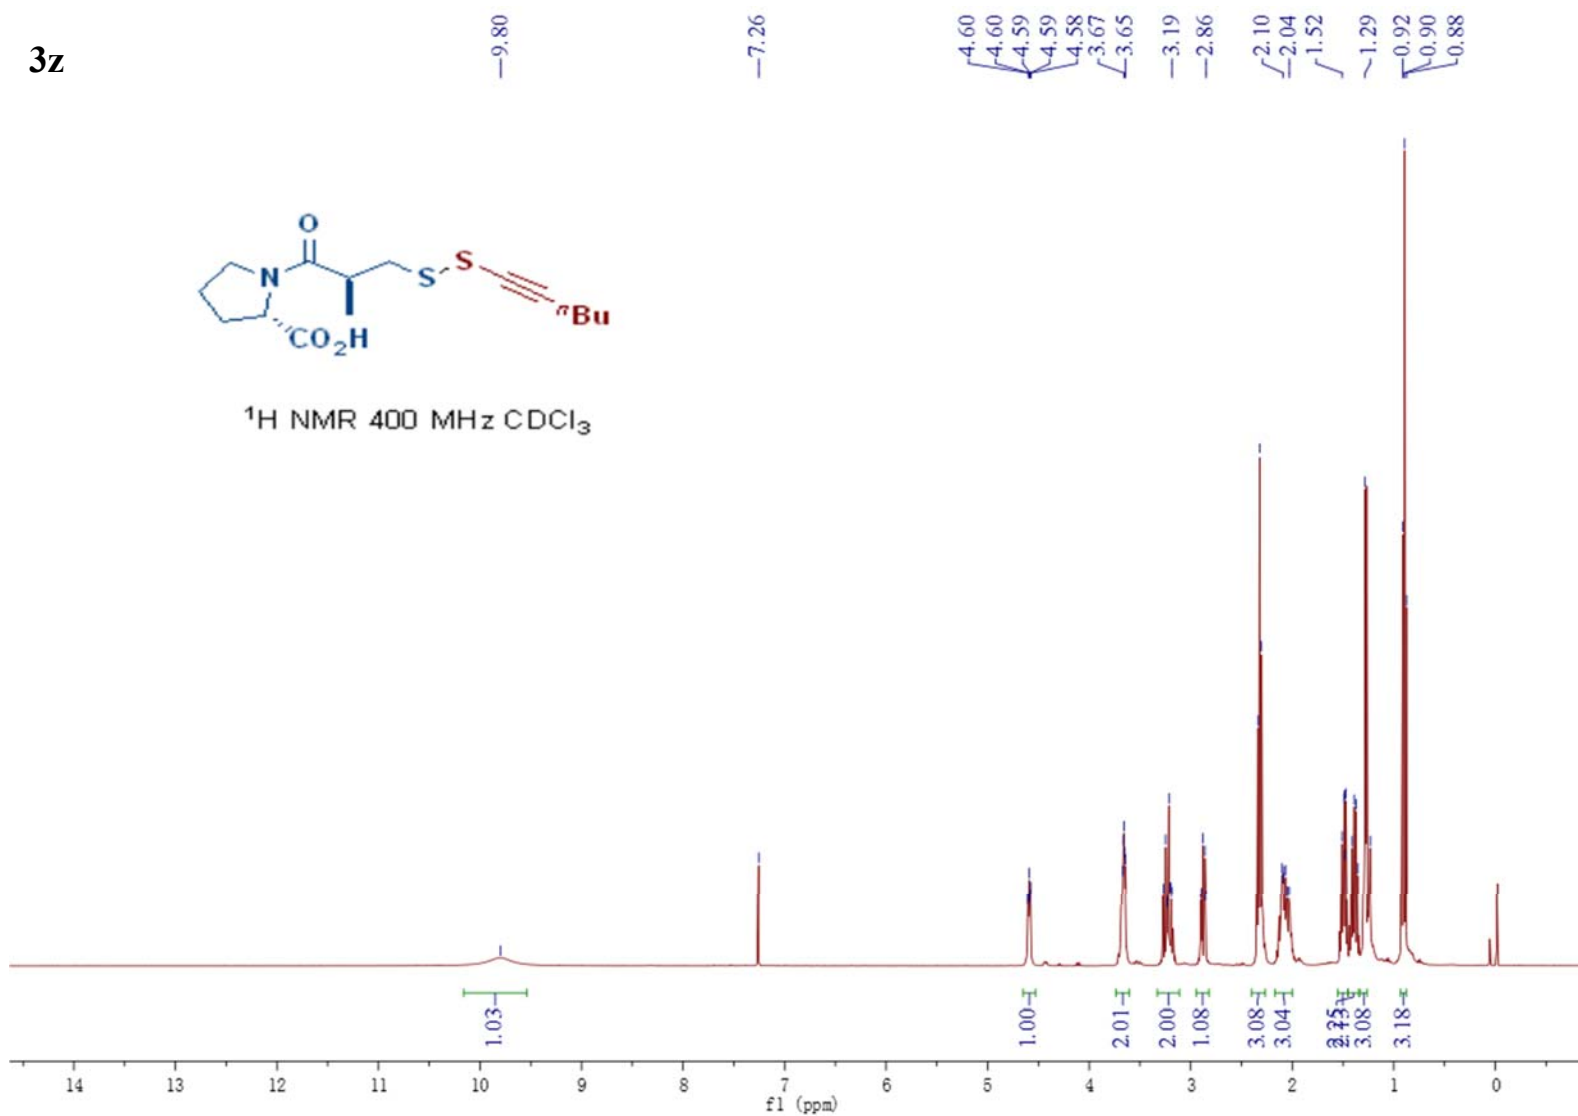

Copies of NMR spectra

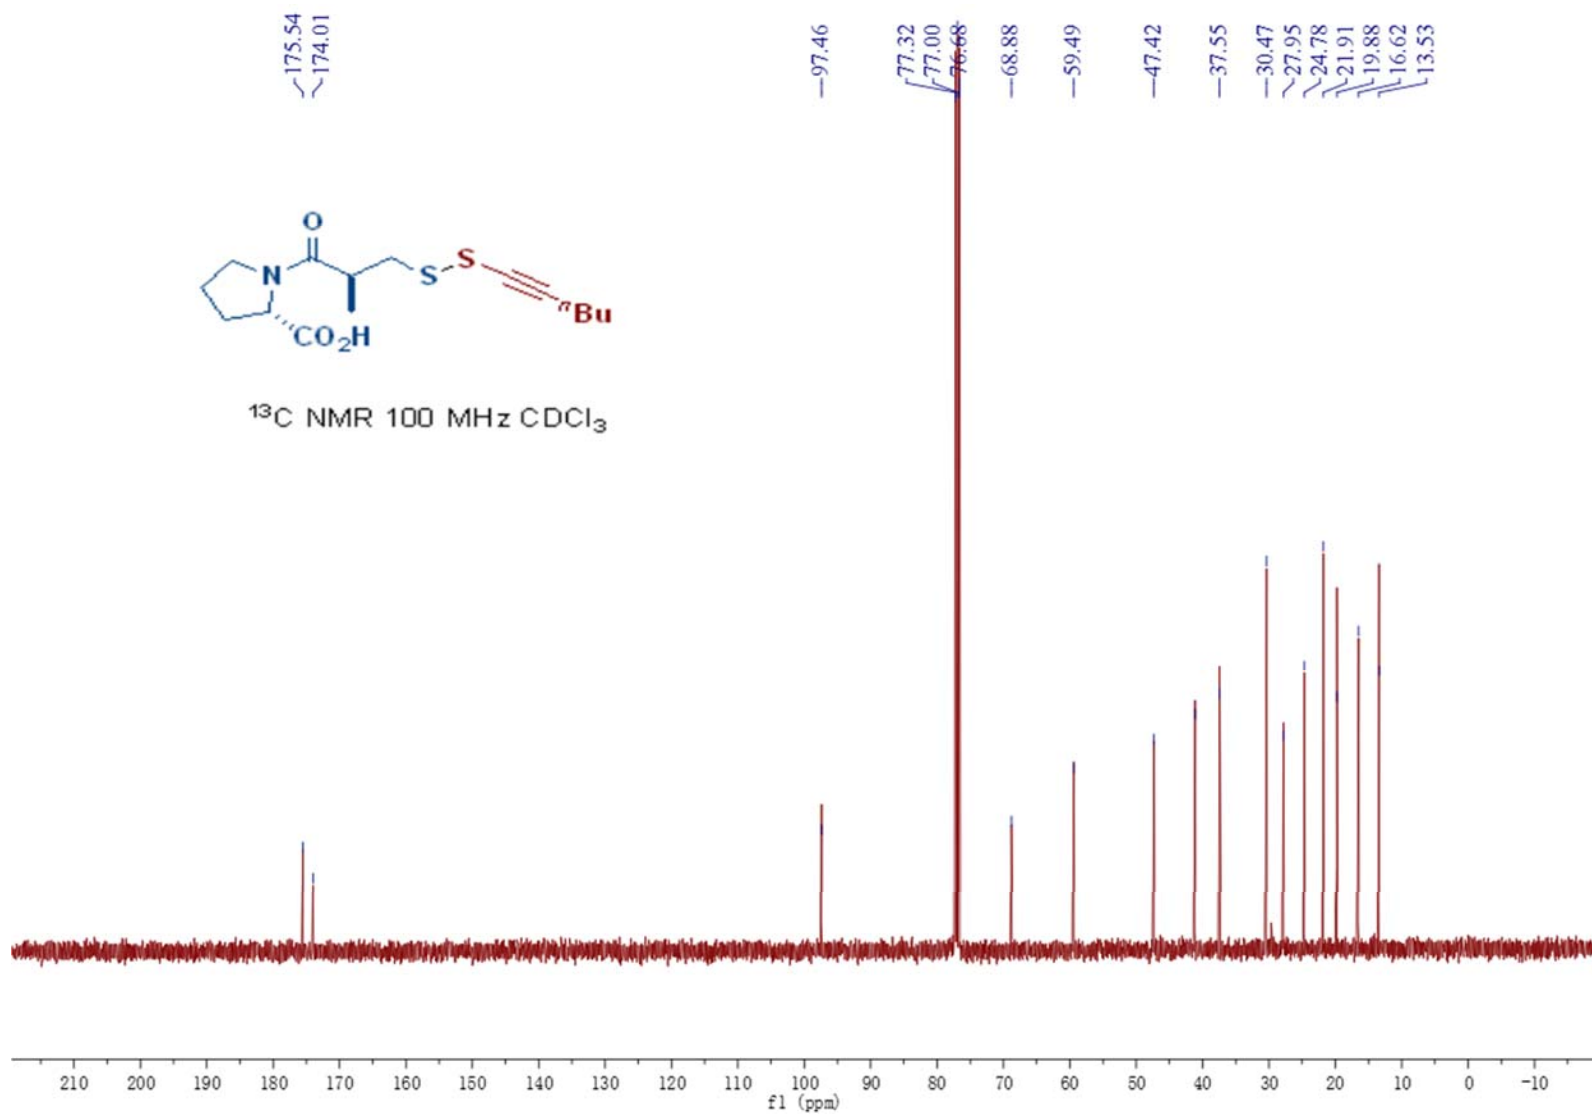

3aa'

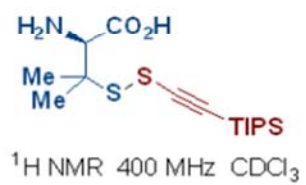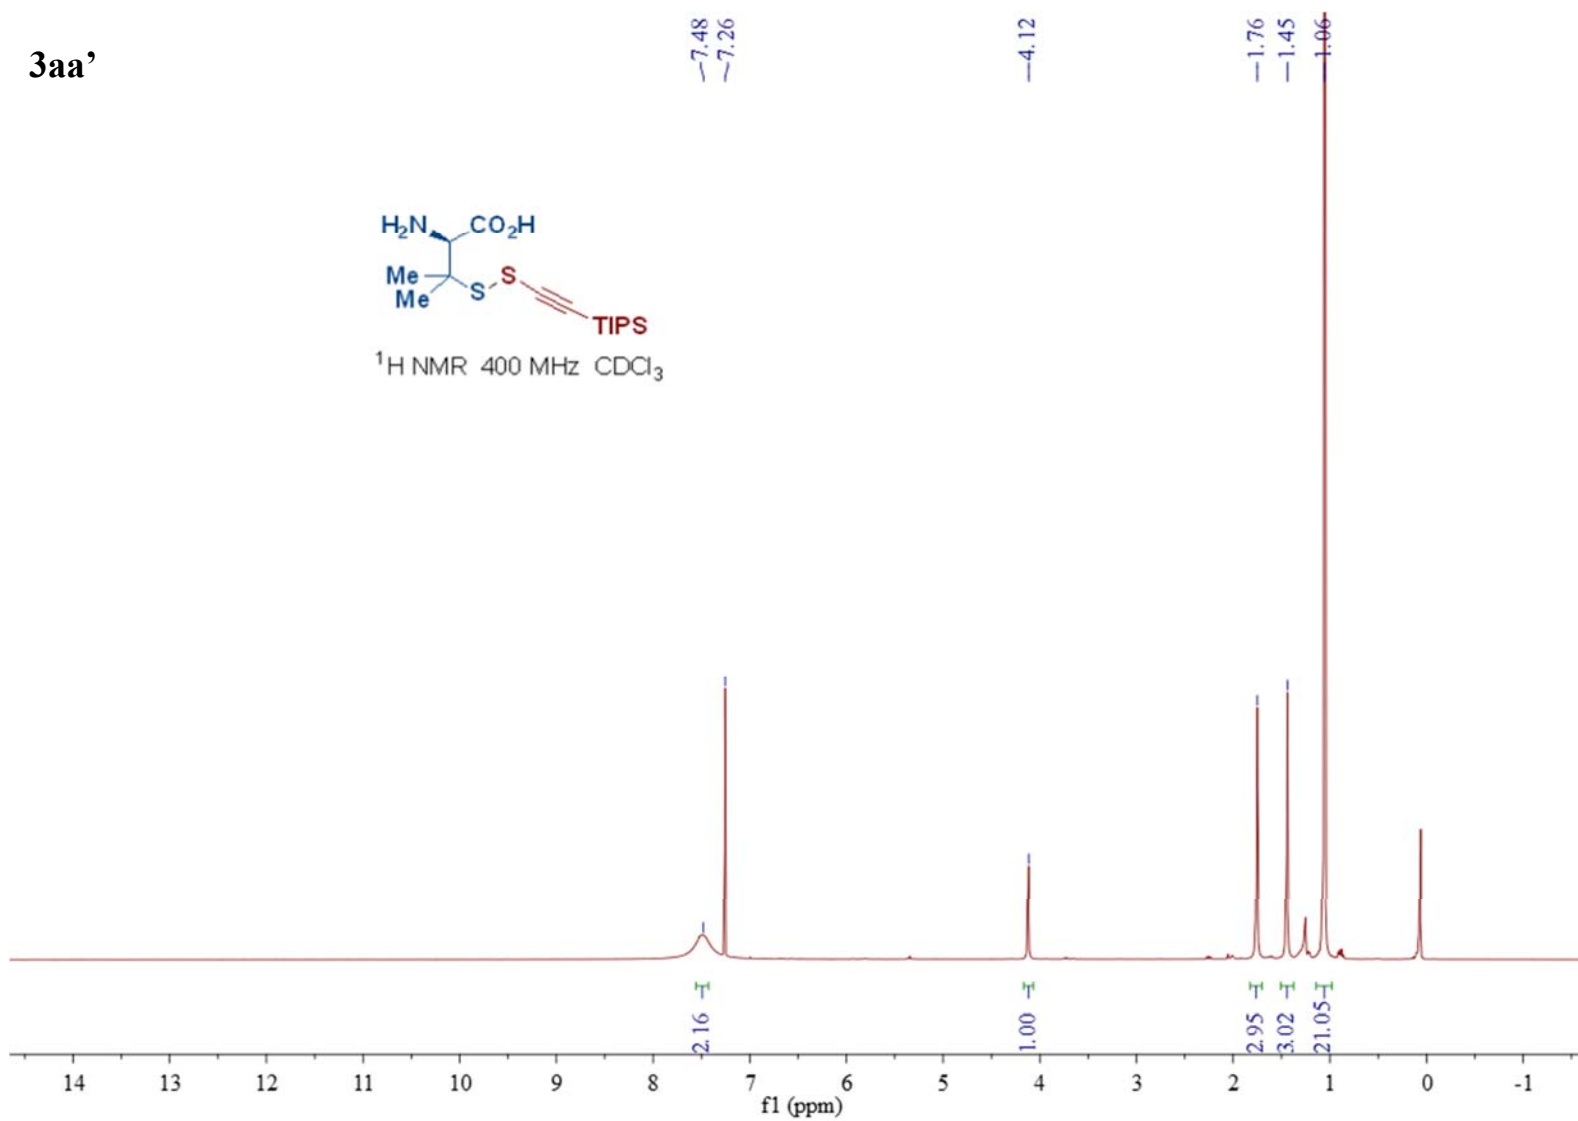

Copies of NMR spectra

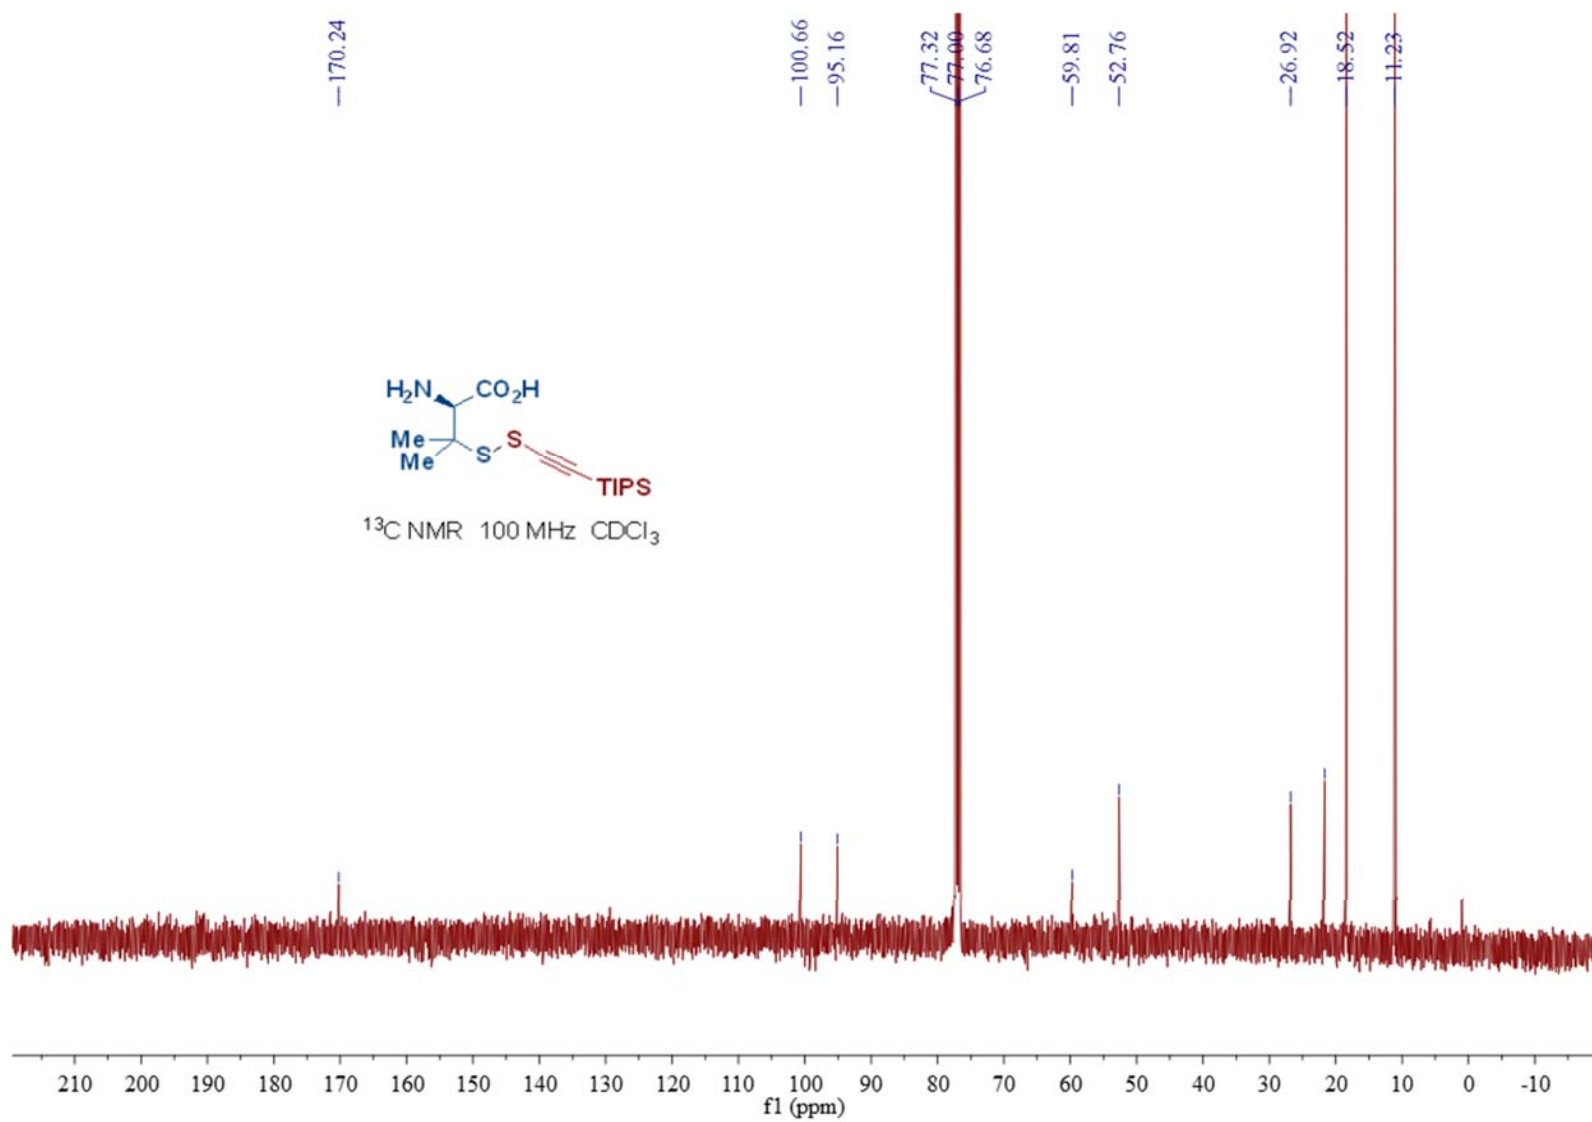

3ab'

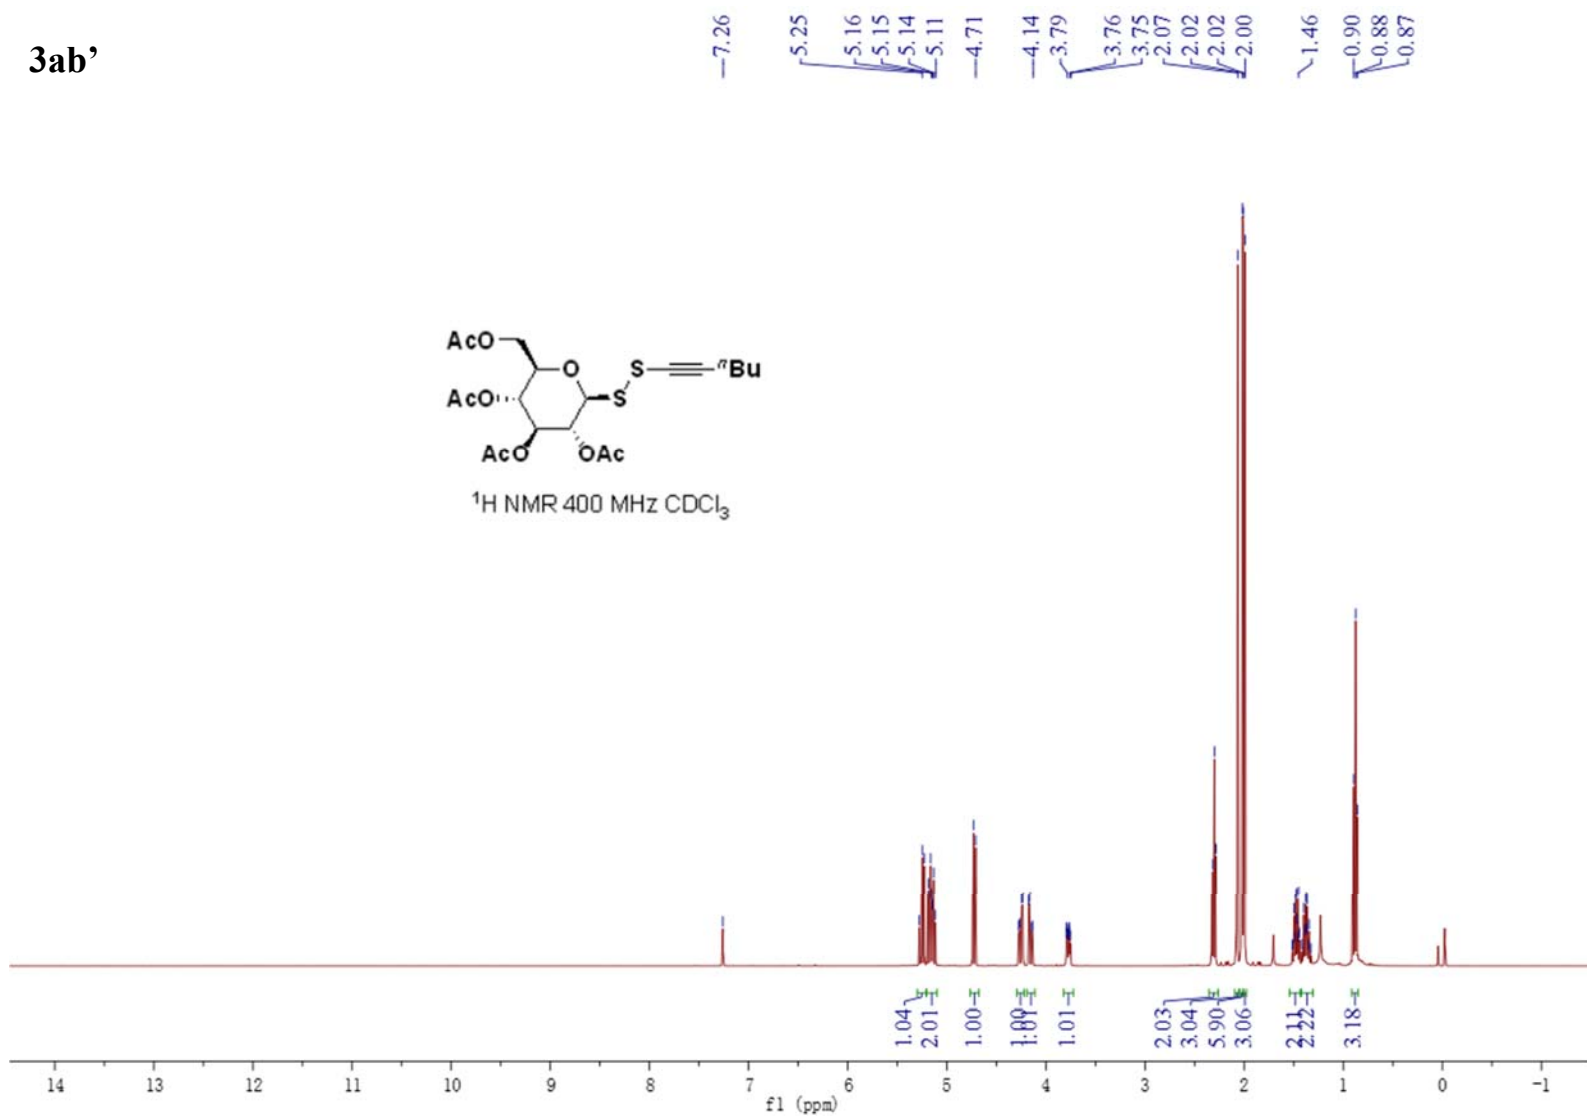

Copies of NMR spectra

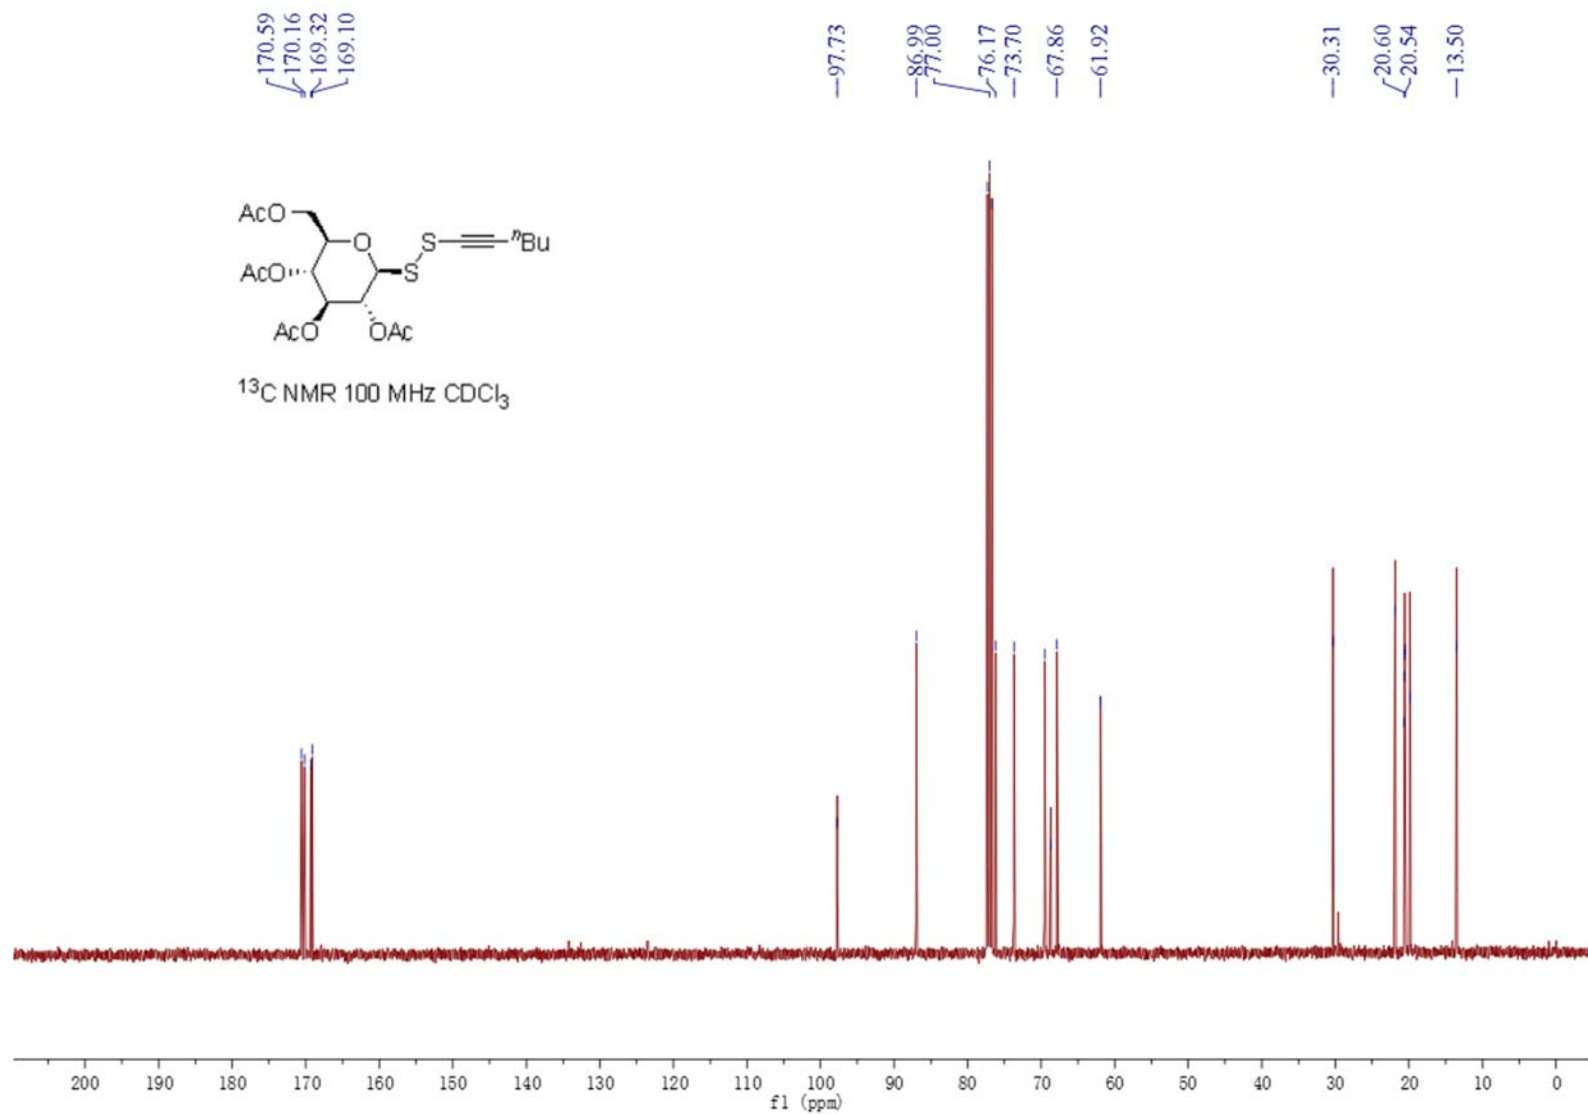



3ac'

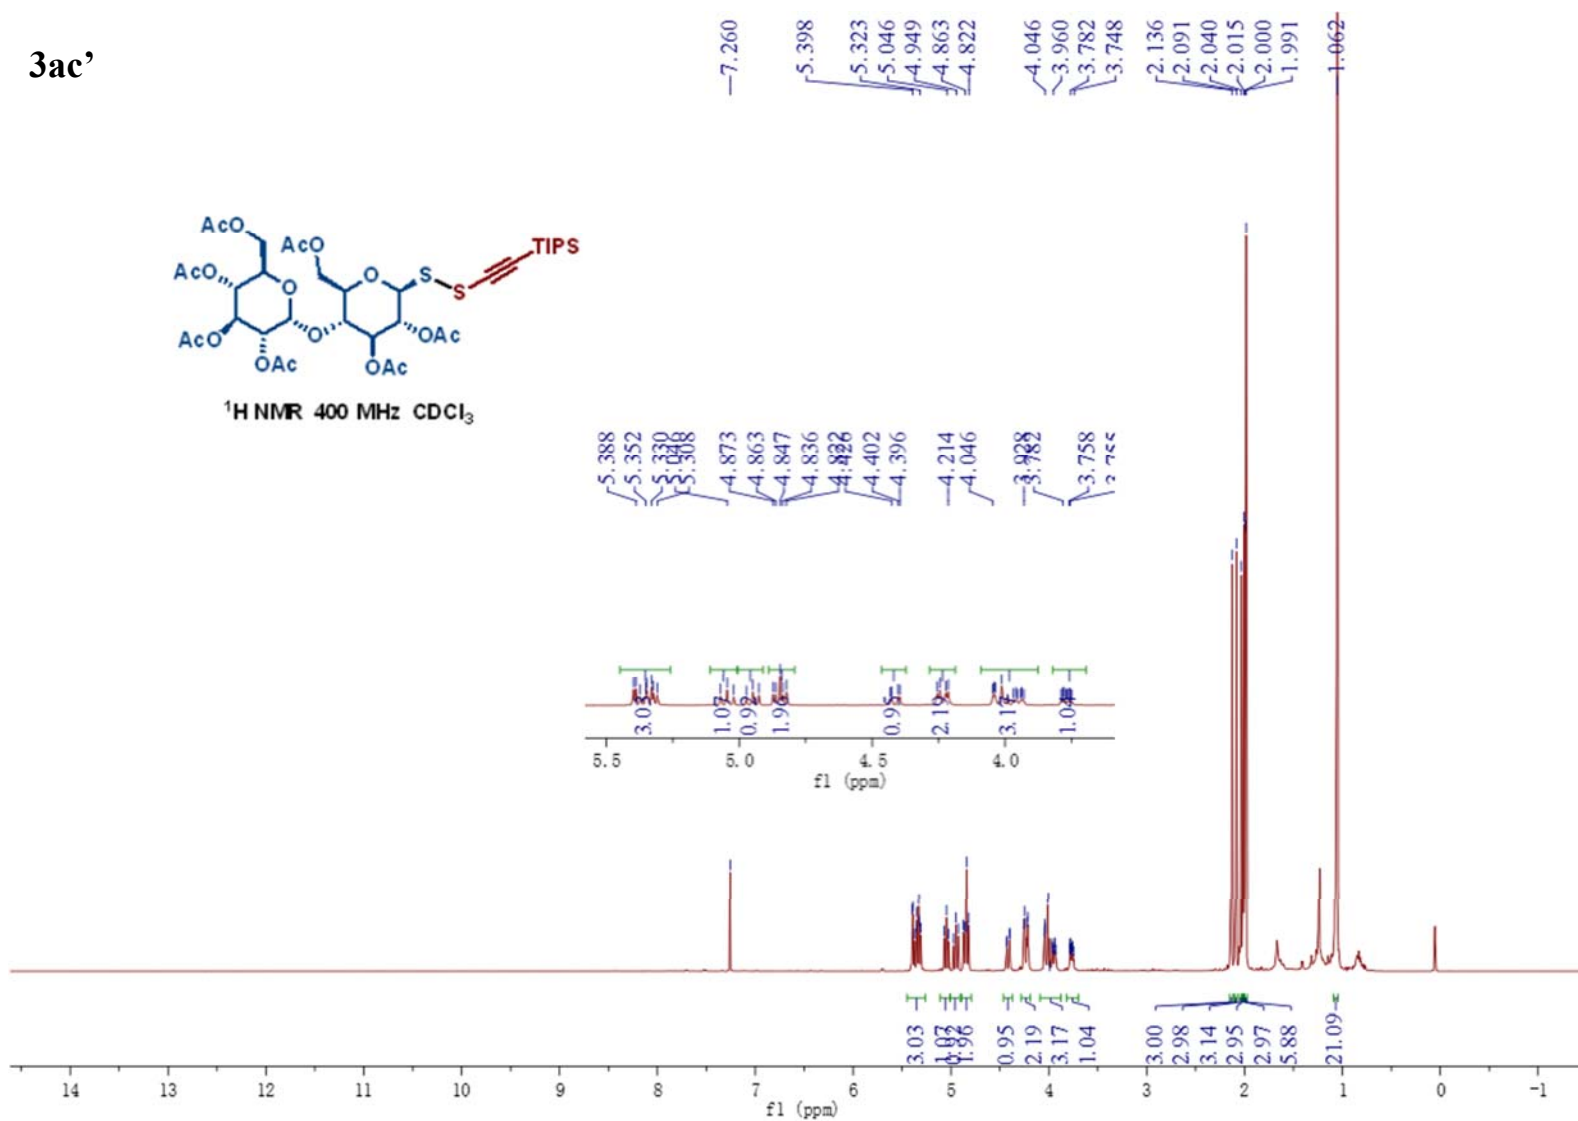

Copies of NMR spectra

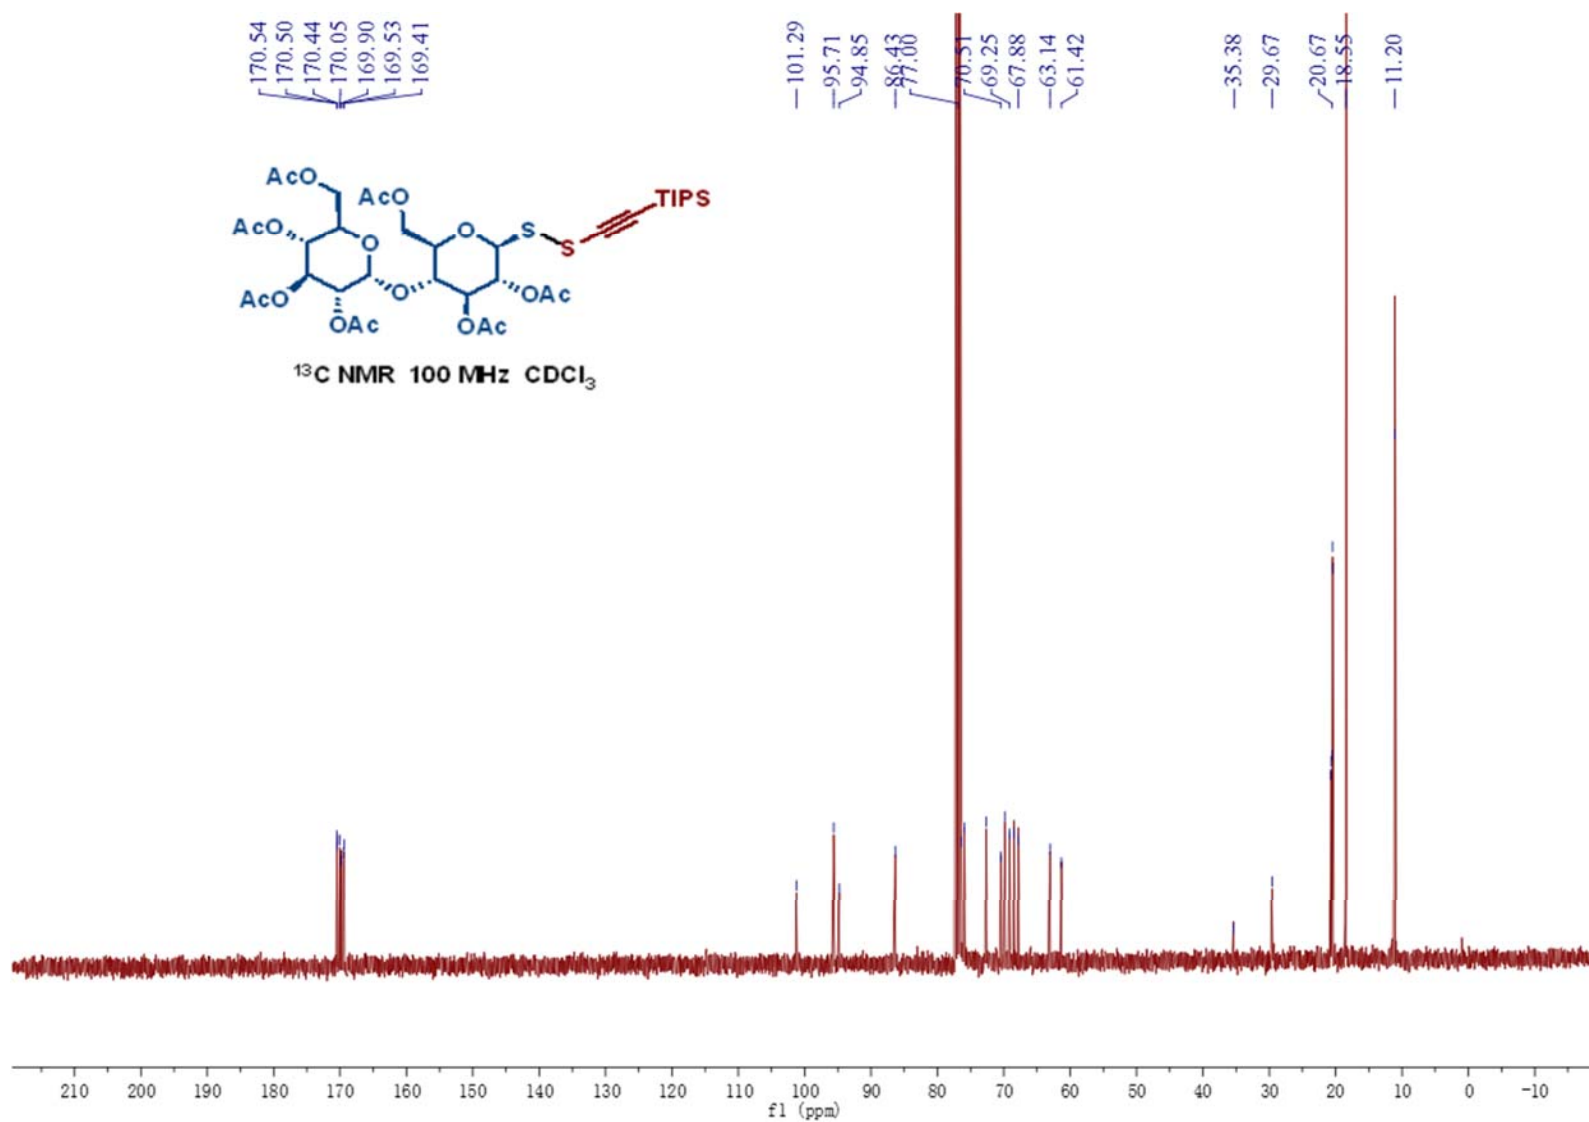

4a

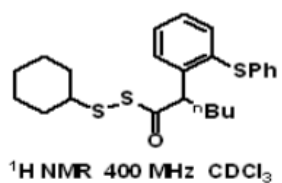

7.41  
7.31  
7.26  
7.26  
7.25  
7.24  
7.23  
7.22  
7.21  
7.20

4.77  
4.75  
4.73

-2.66

1.86  
1.72  
1.71  
1.70

0.82  
0.80  
0.78

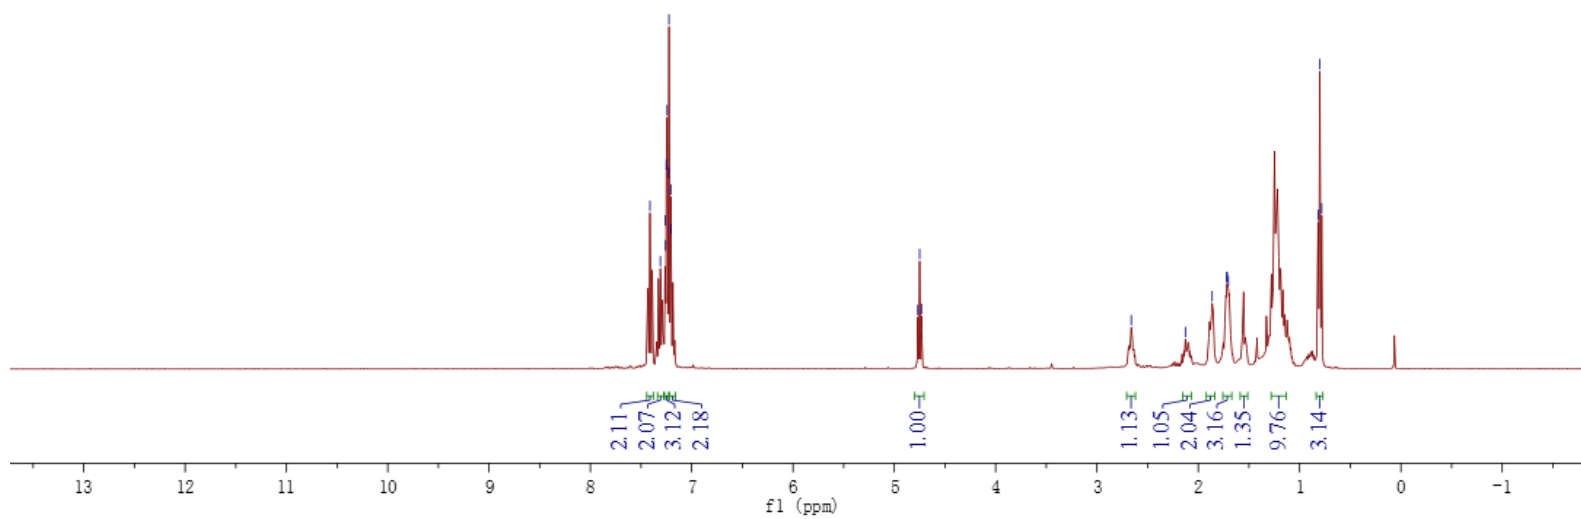

Copies of NMR spectra

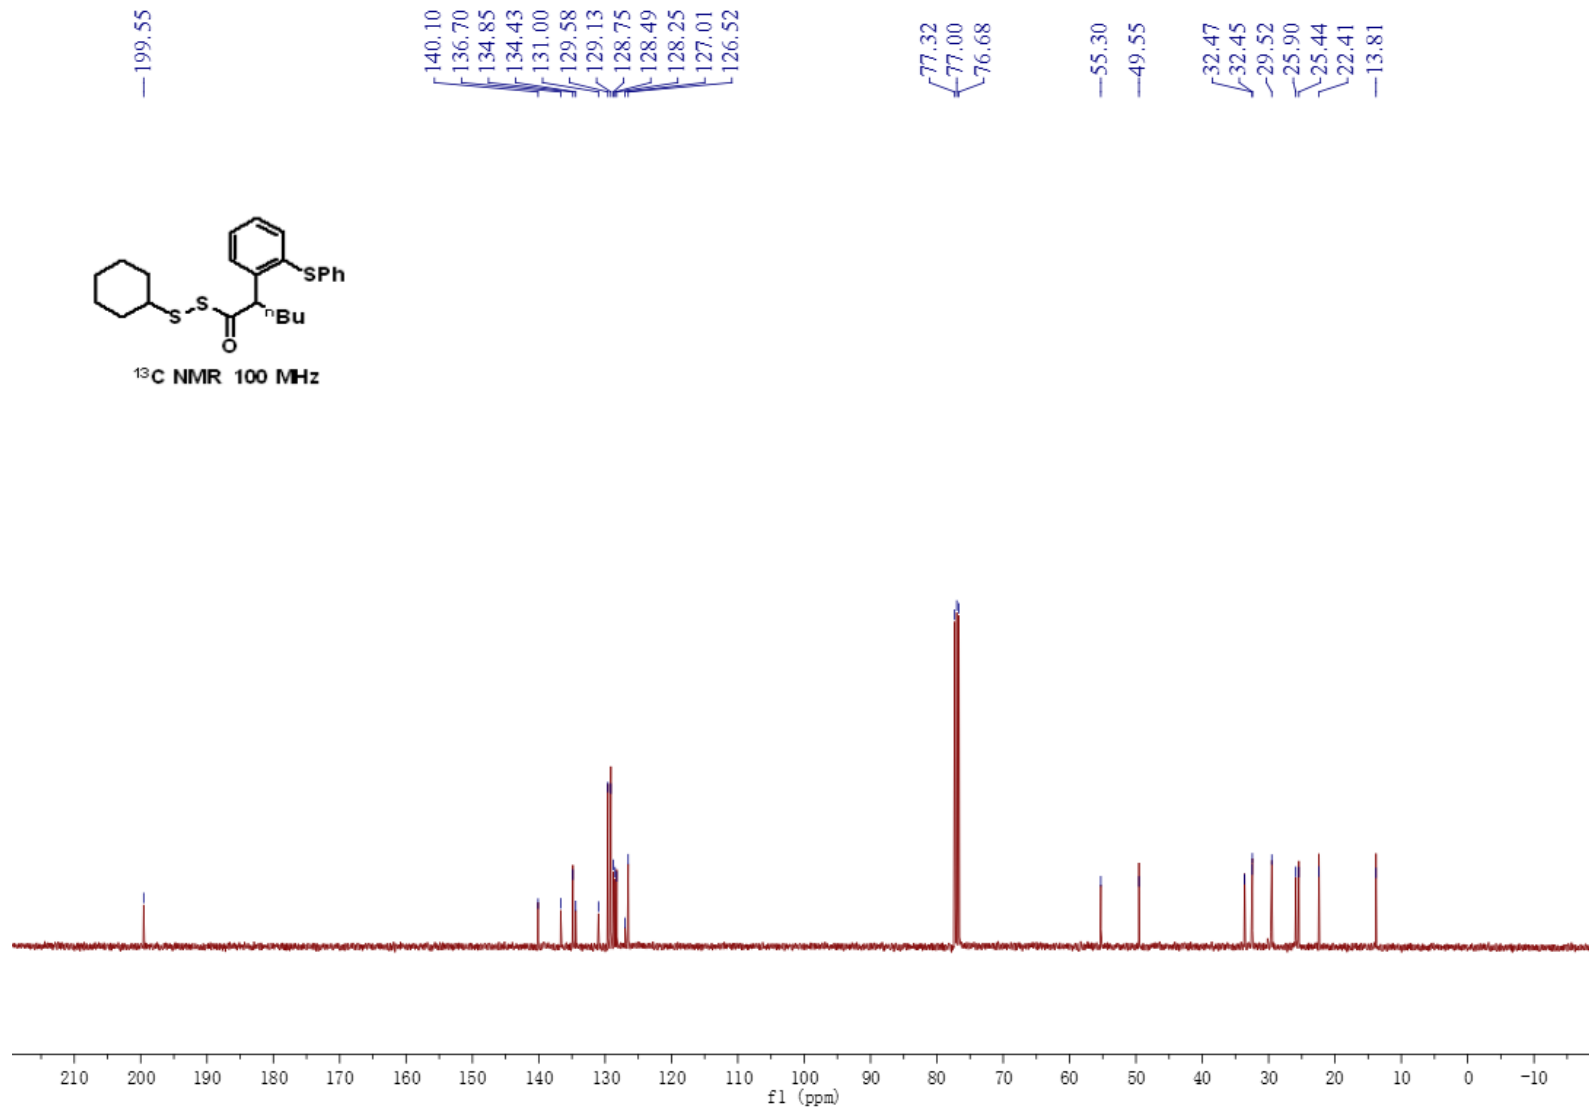

4b

7.45  
7.45  
7.43  
7.43  
7.42  
7.42  
7.40  
7.40  
7.33  
7.32  
7.31  
7.31  
7.28  
7.28  
7.27  
7.26  
7.25  
7.25  
7.23  
7.23  
7.20  
7.18

4.82  
4.80  
4.78

2.15  
2.10  
2.05  
2.00  
1.72  
1.61  
1.57  
1.54

0.83  
0.81  
0.79

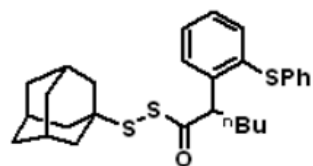

<sup>1</sup>H NMR 400 MHz CDCl<sub>3</sub>

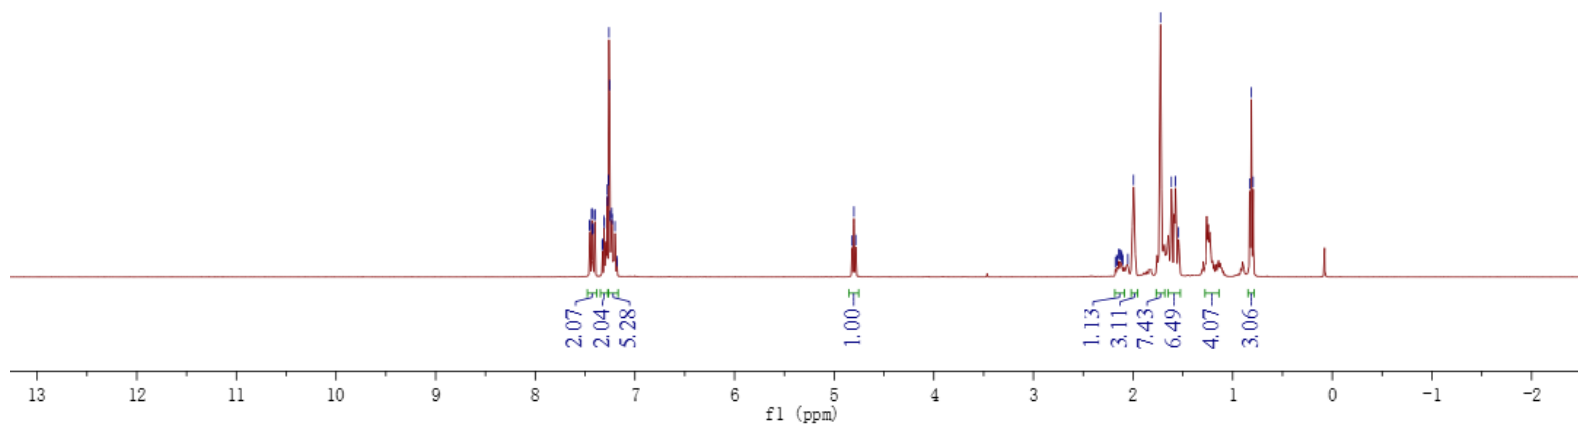

Copies of NMR spectra

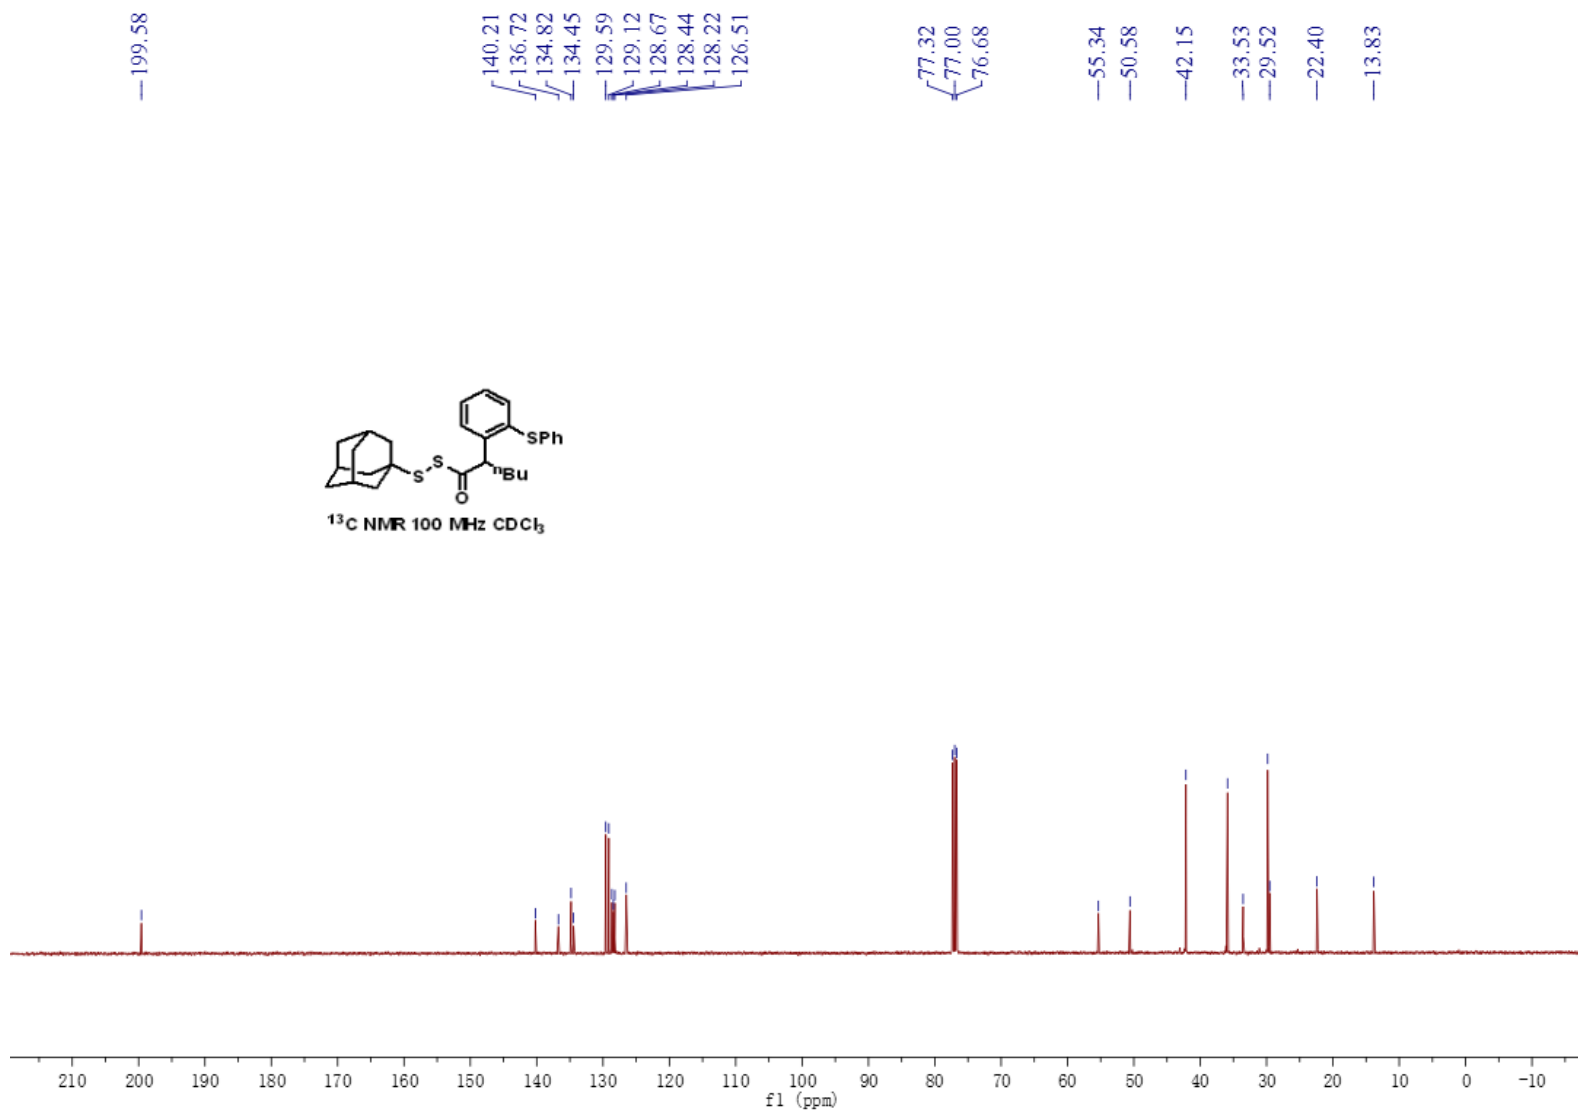

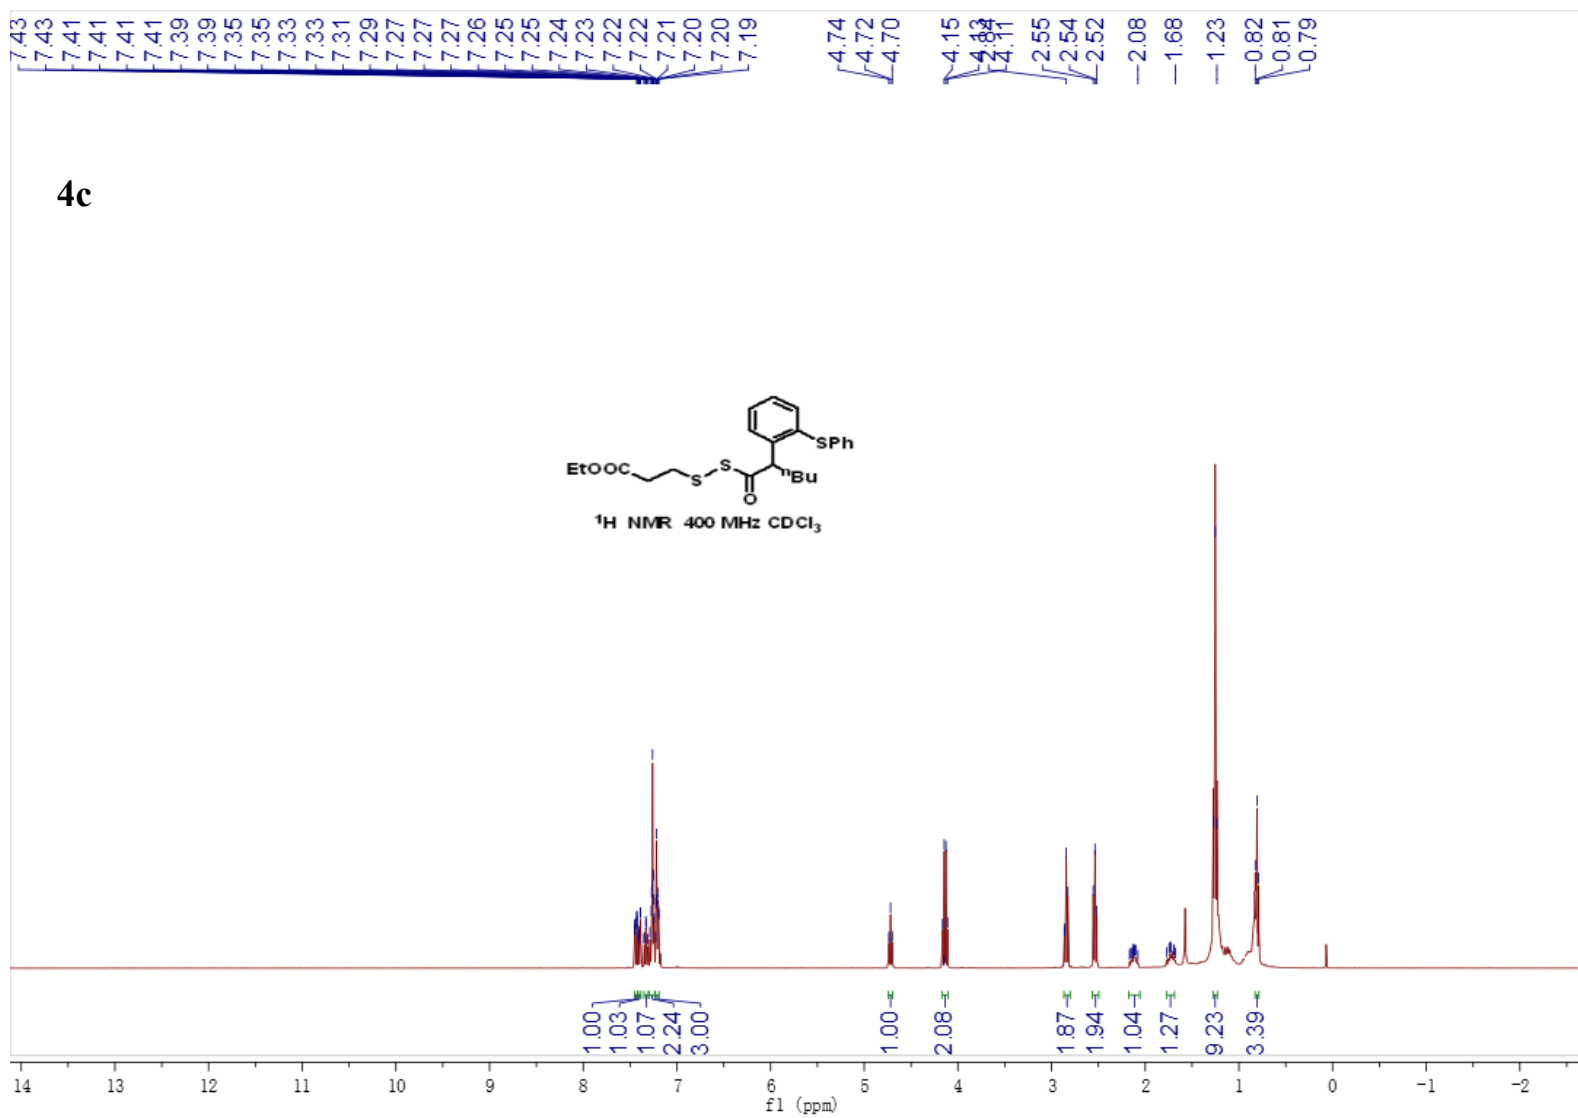

Copies of NMR spectra

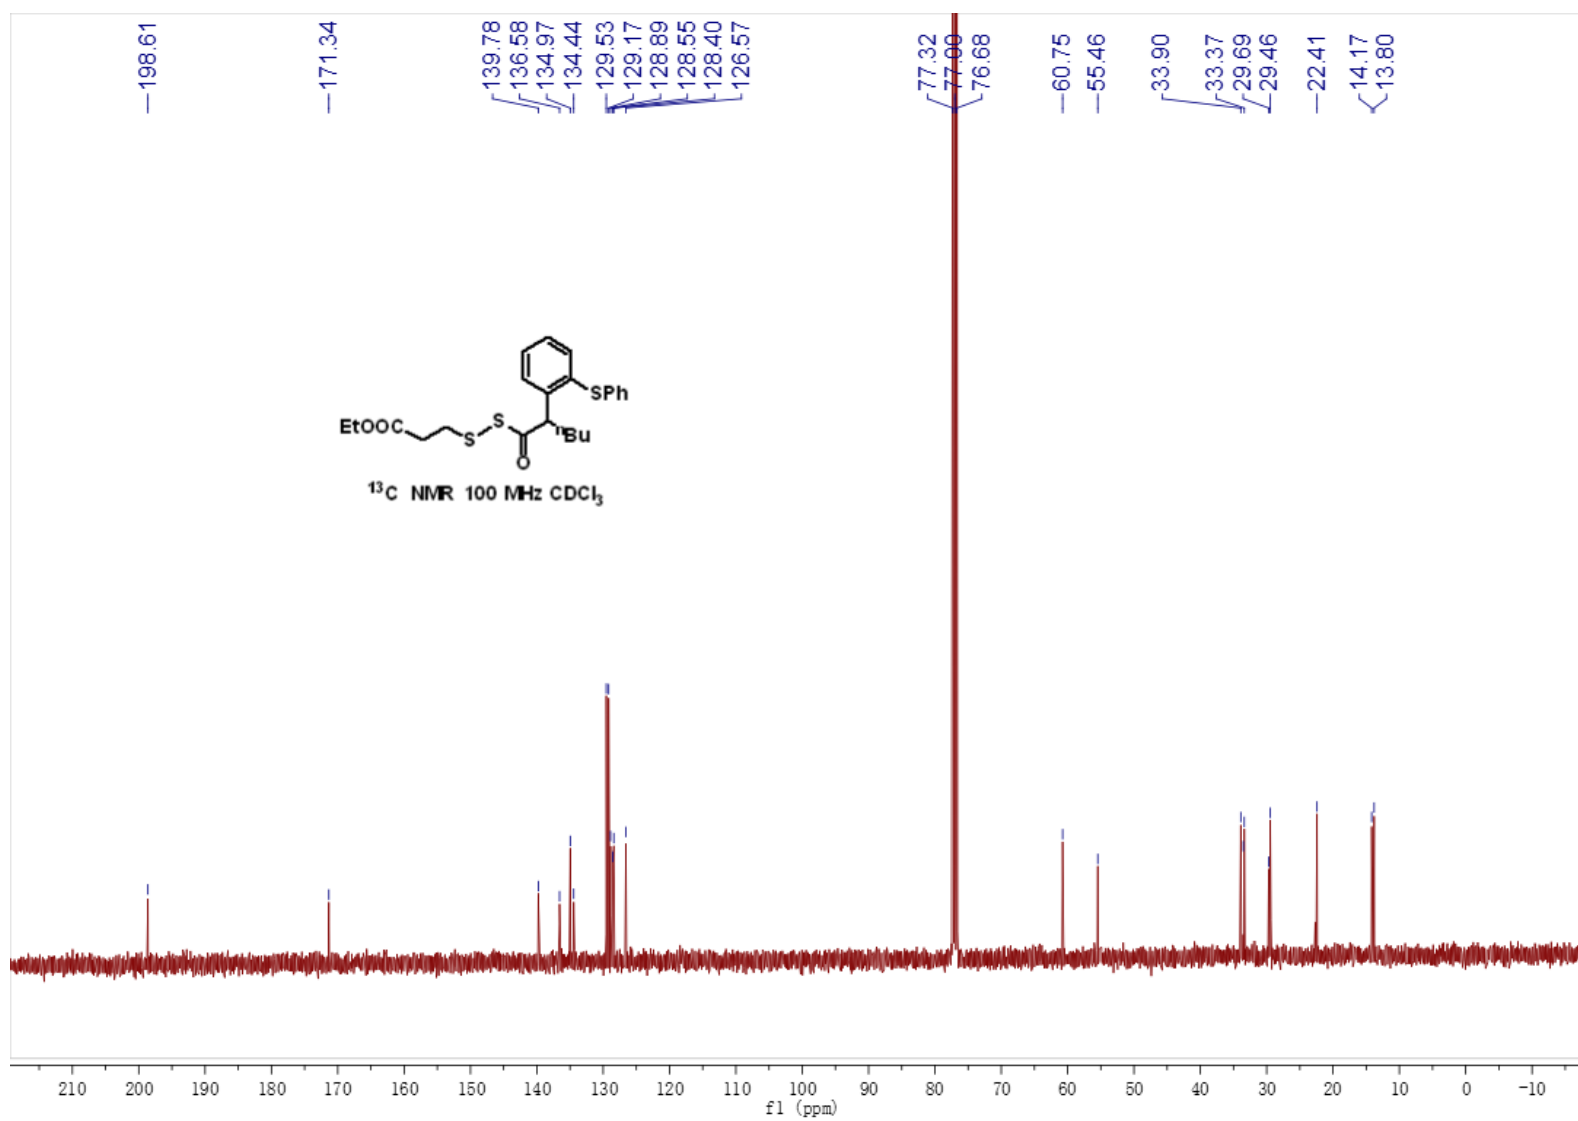



4d

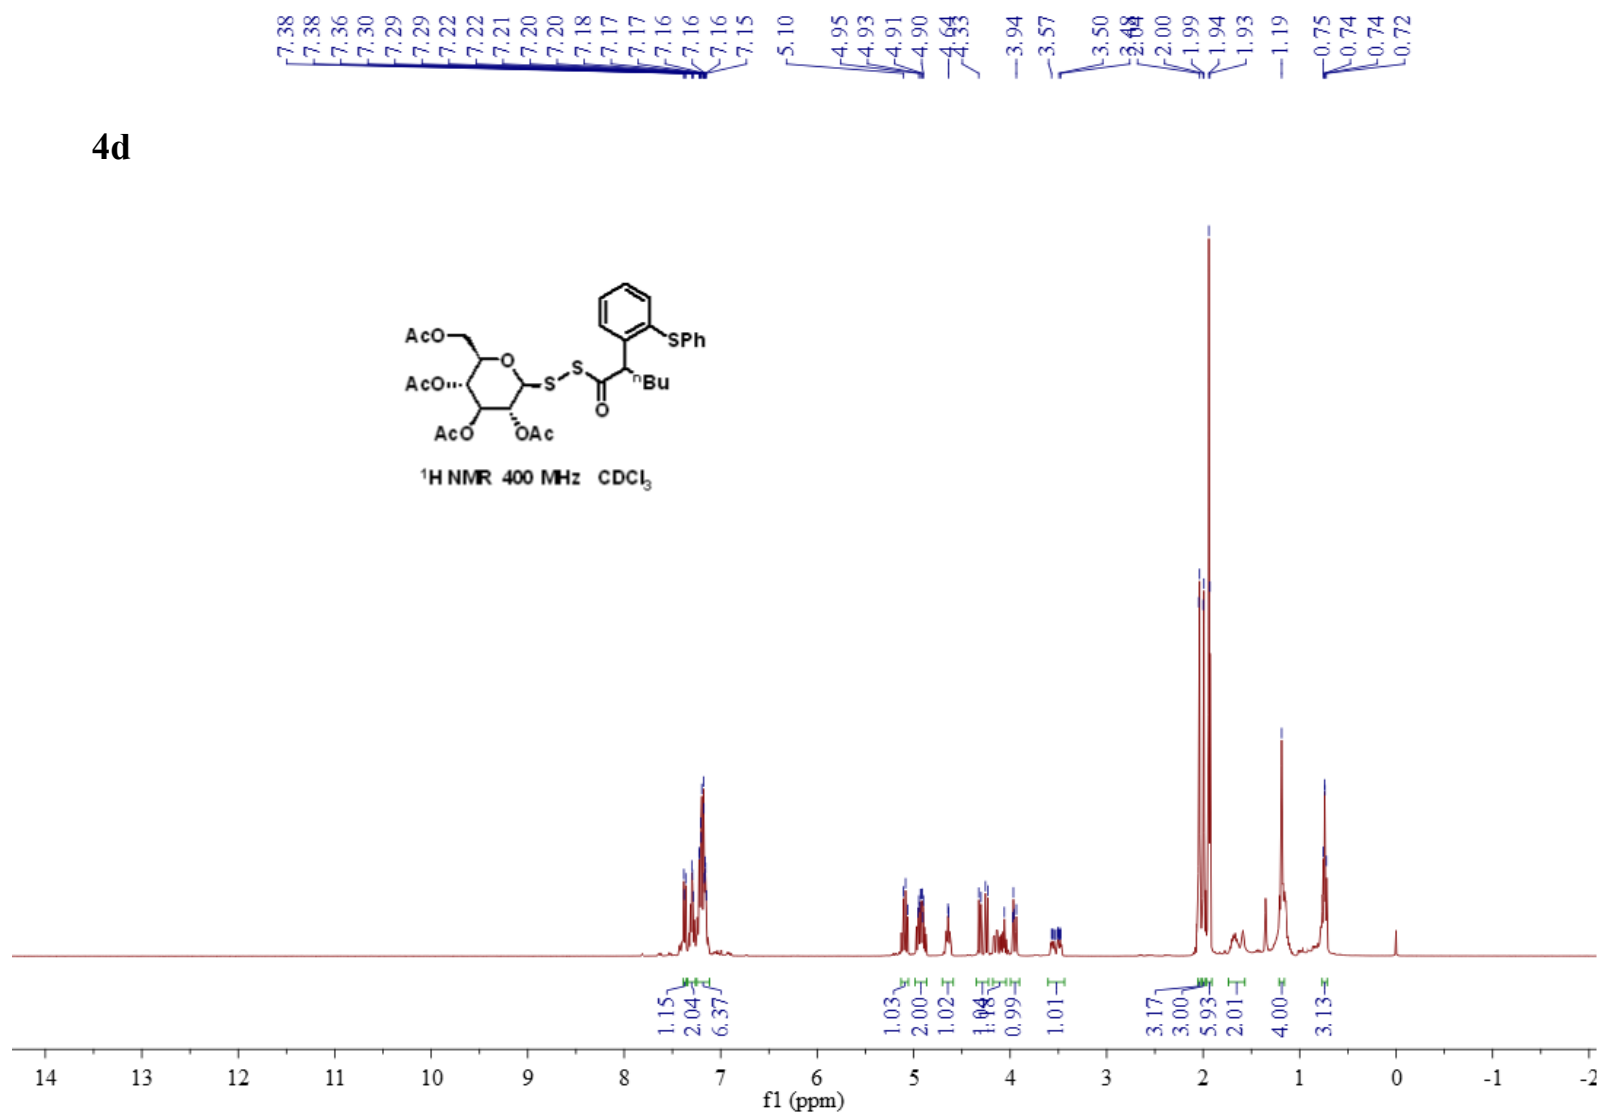

Copies of NMR spectra

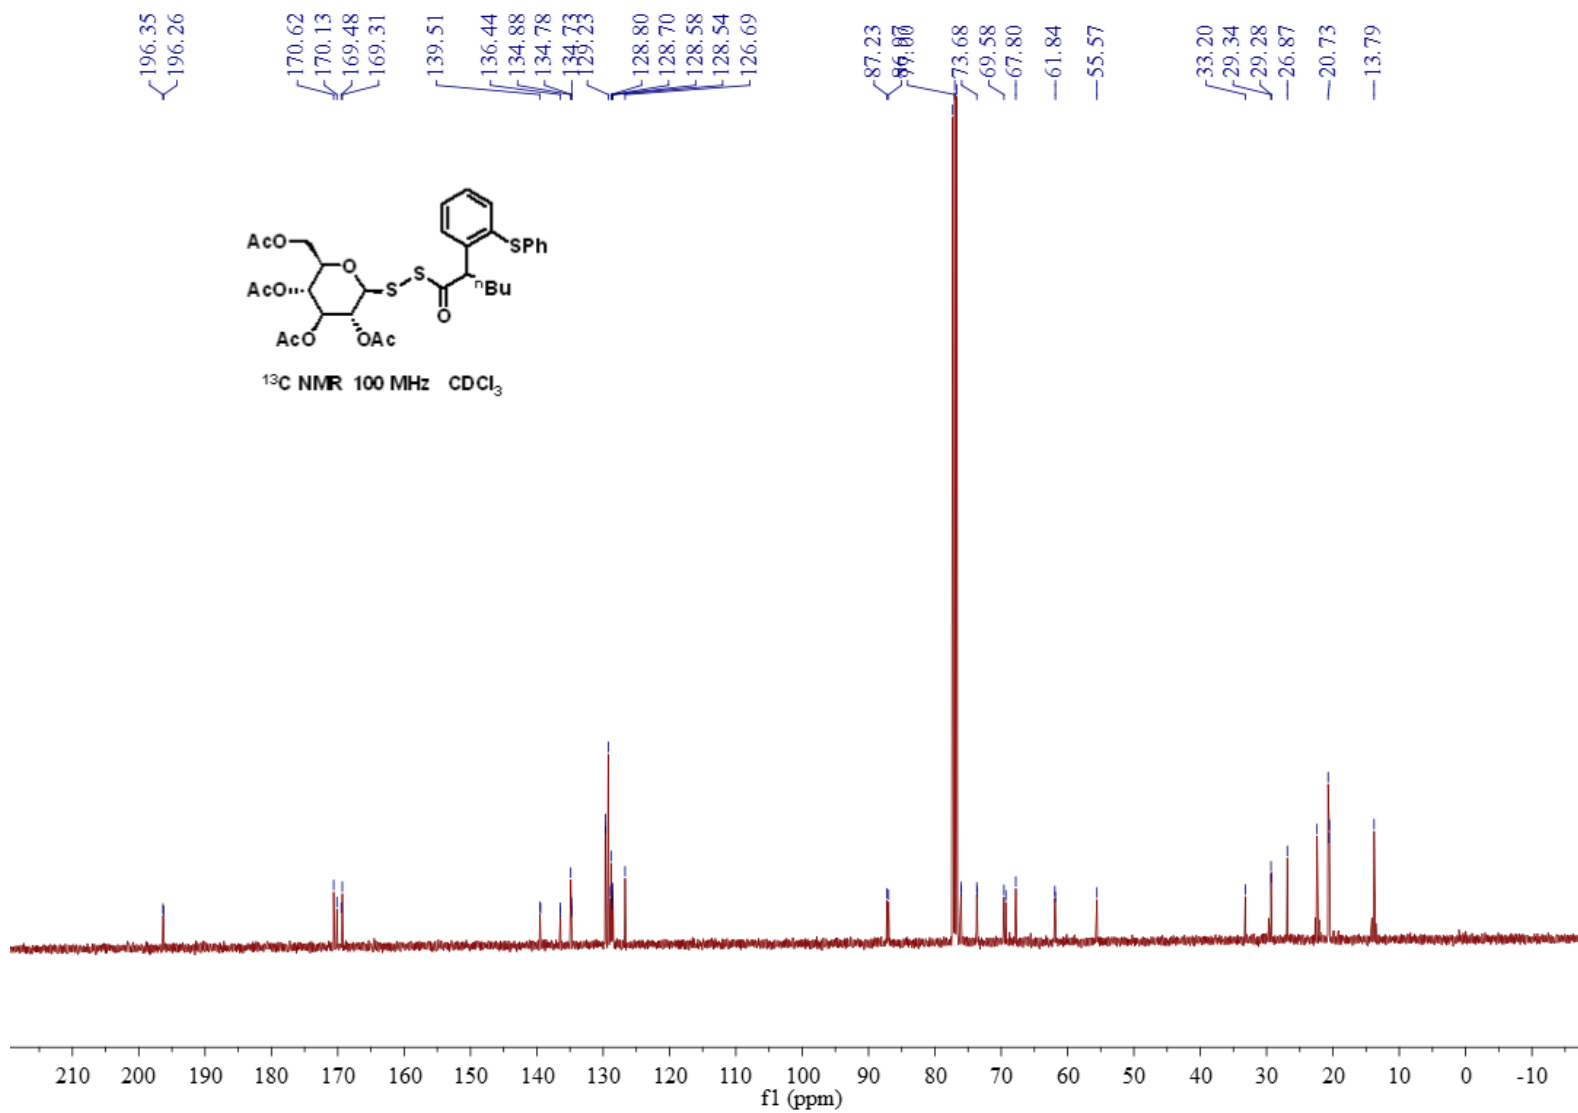

4e

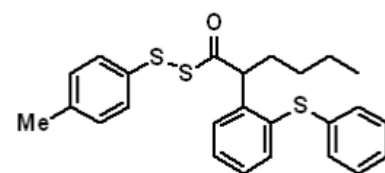

<sup>1</sup>H NMR 400 MHz CDCl<sub>3</sub>

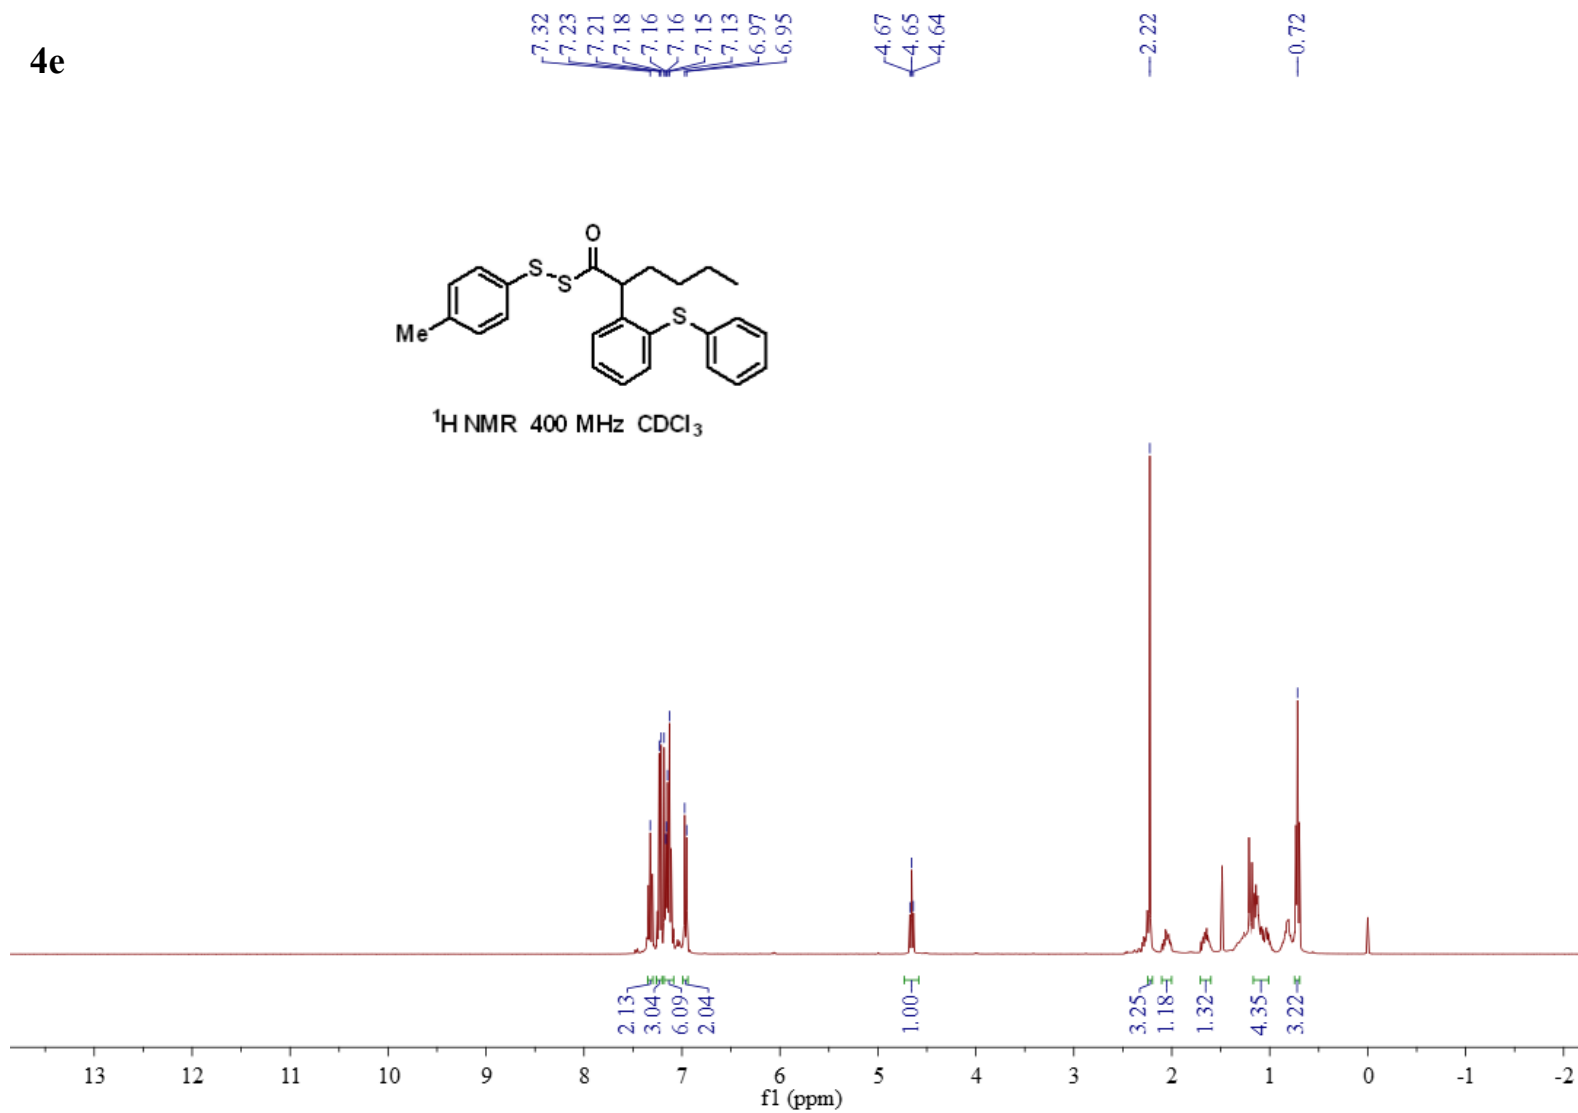

Copies of NMR spectra

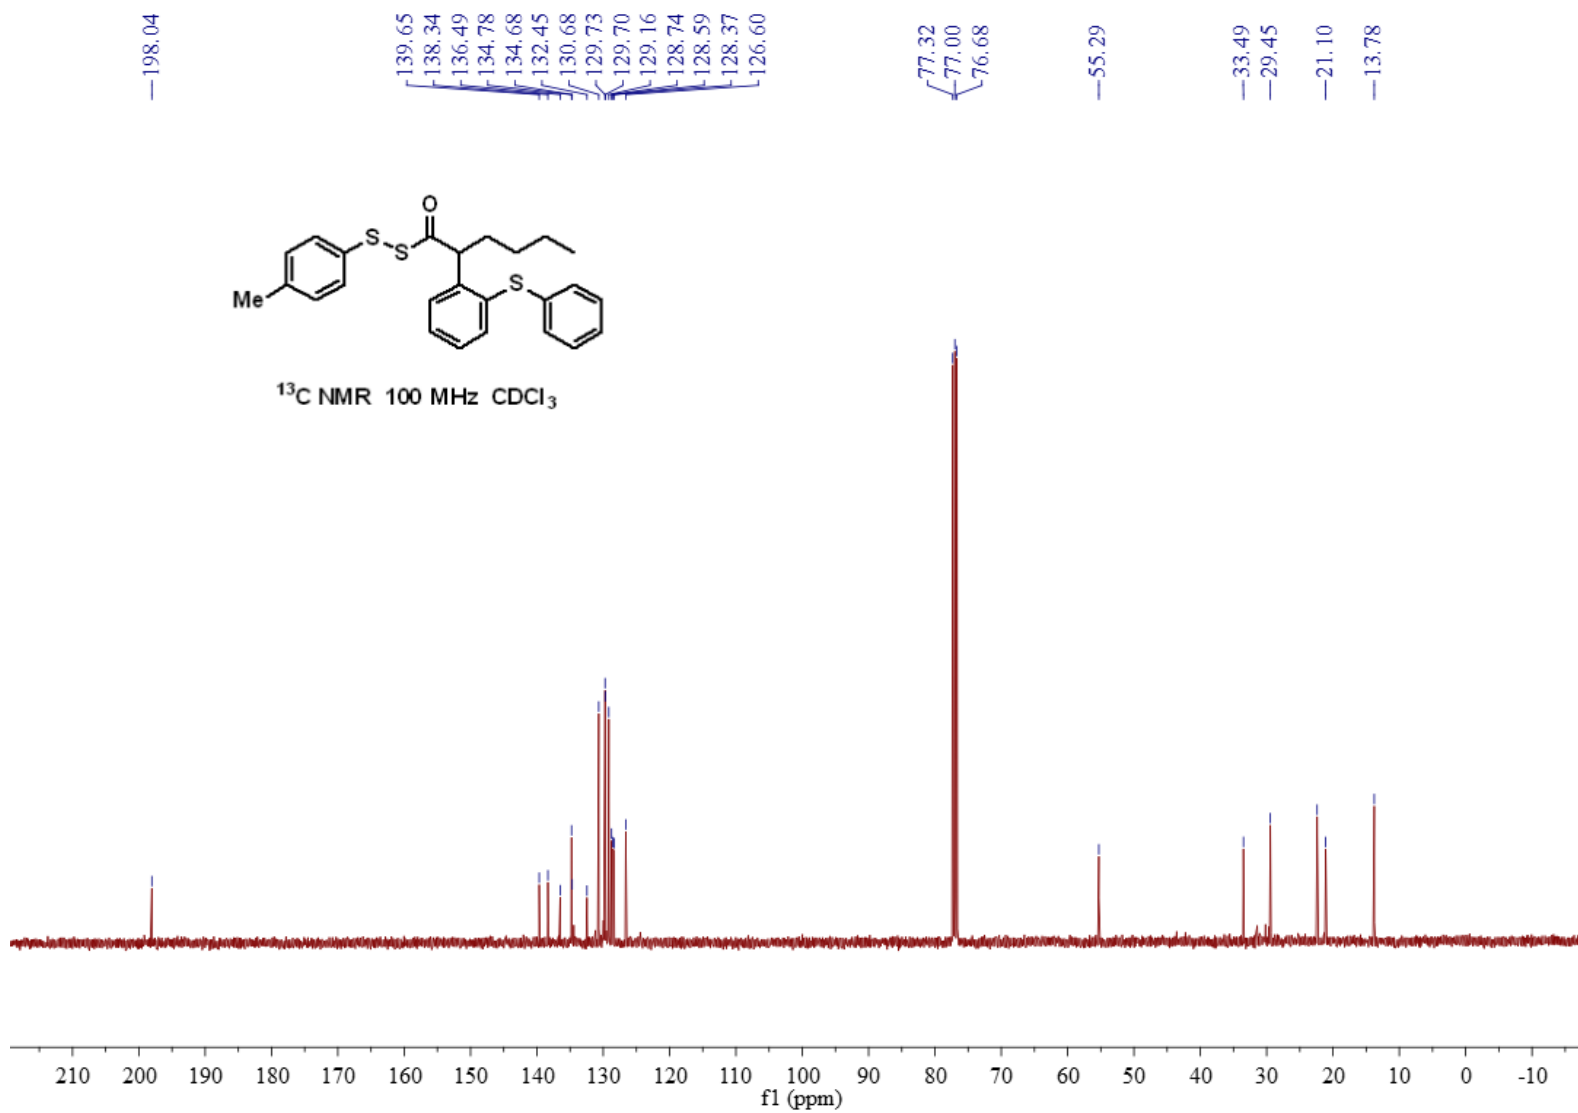

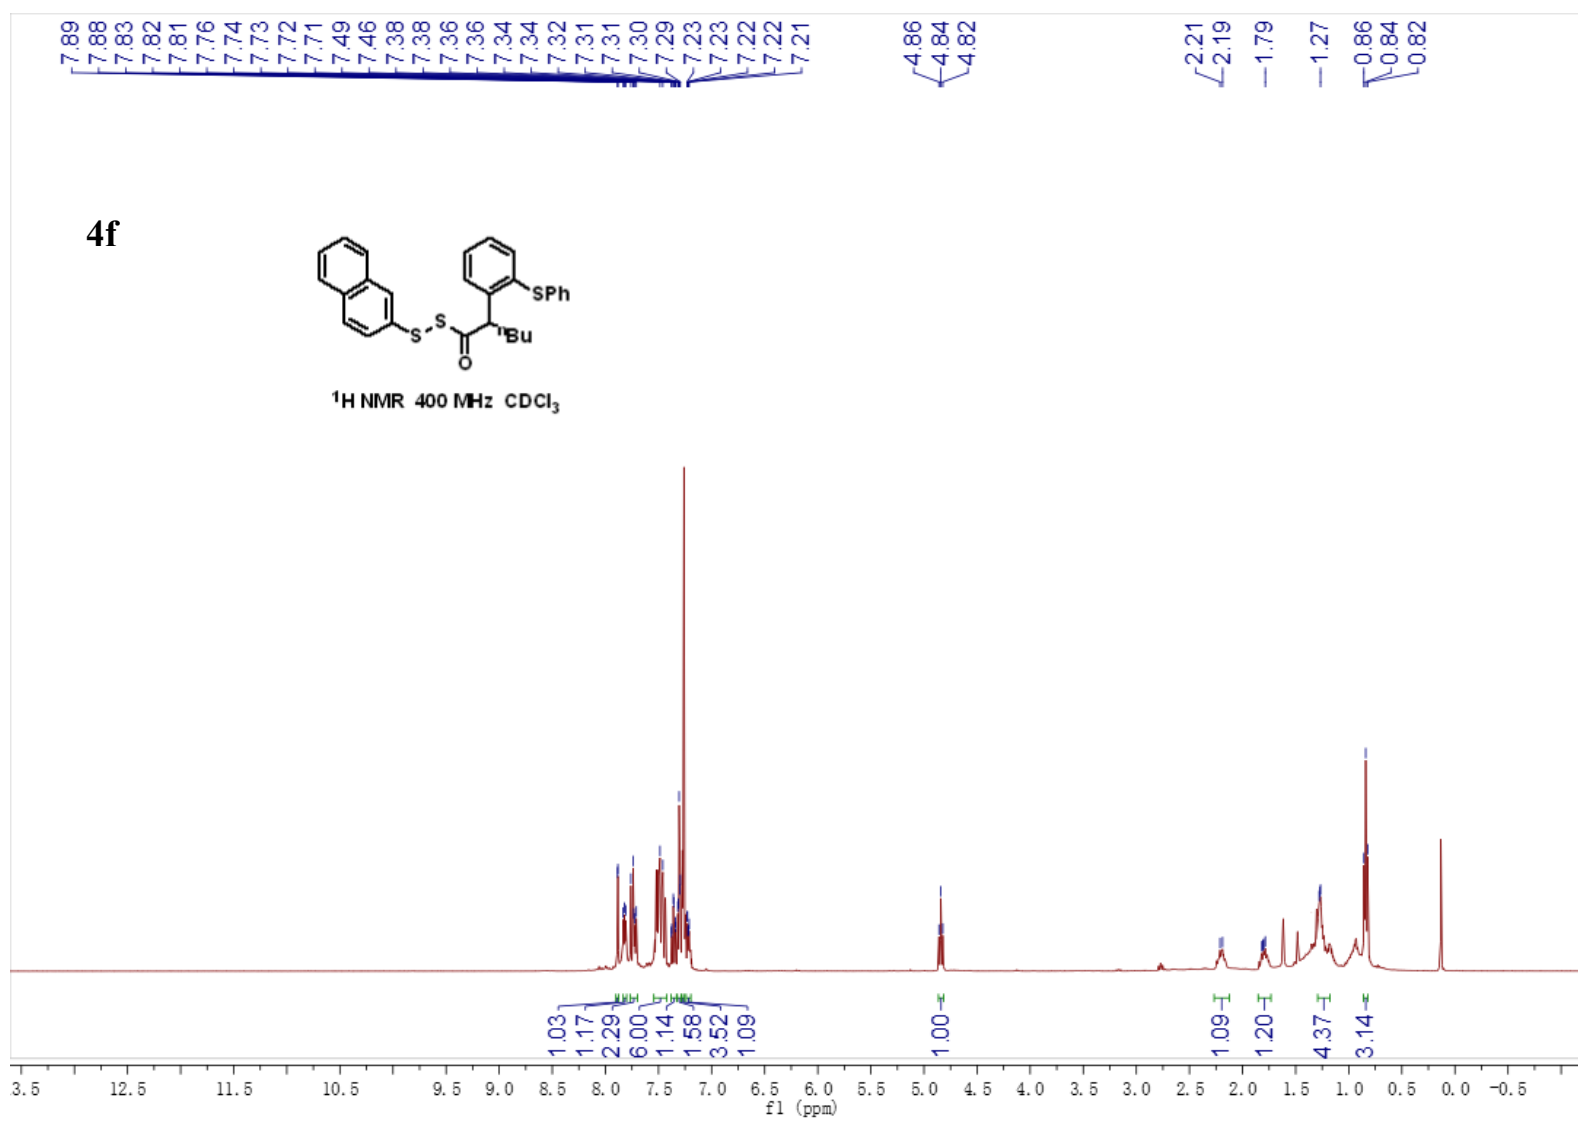

Copies of NMR spectra

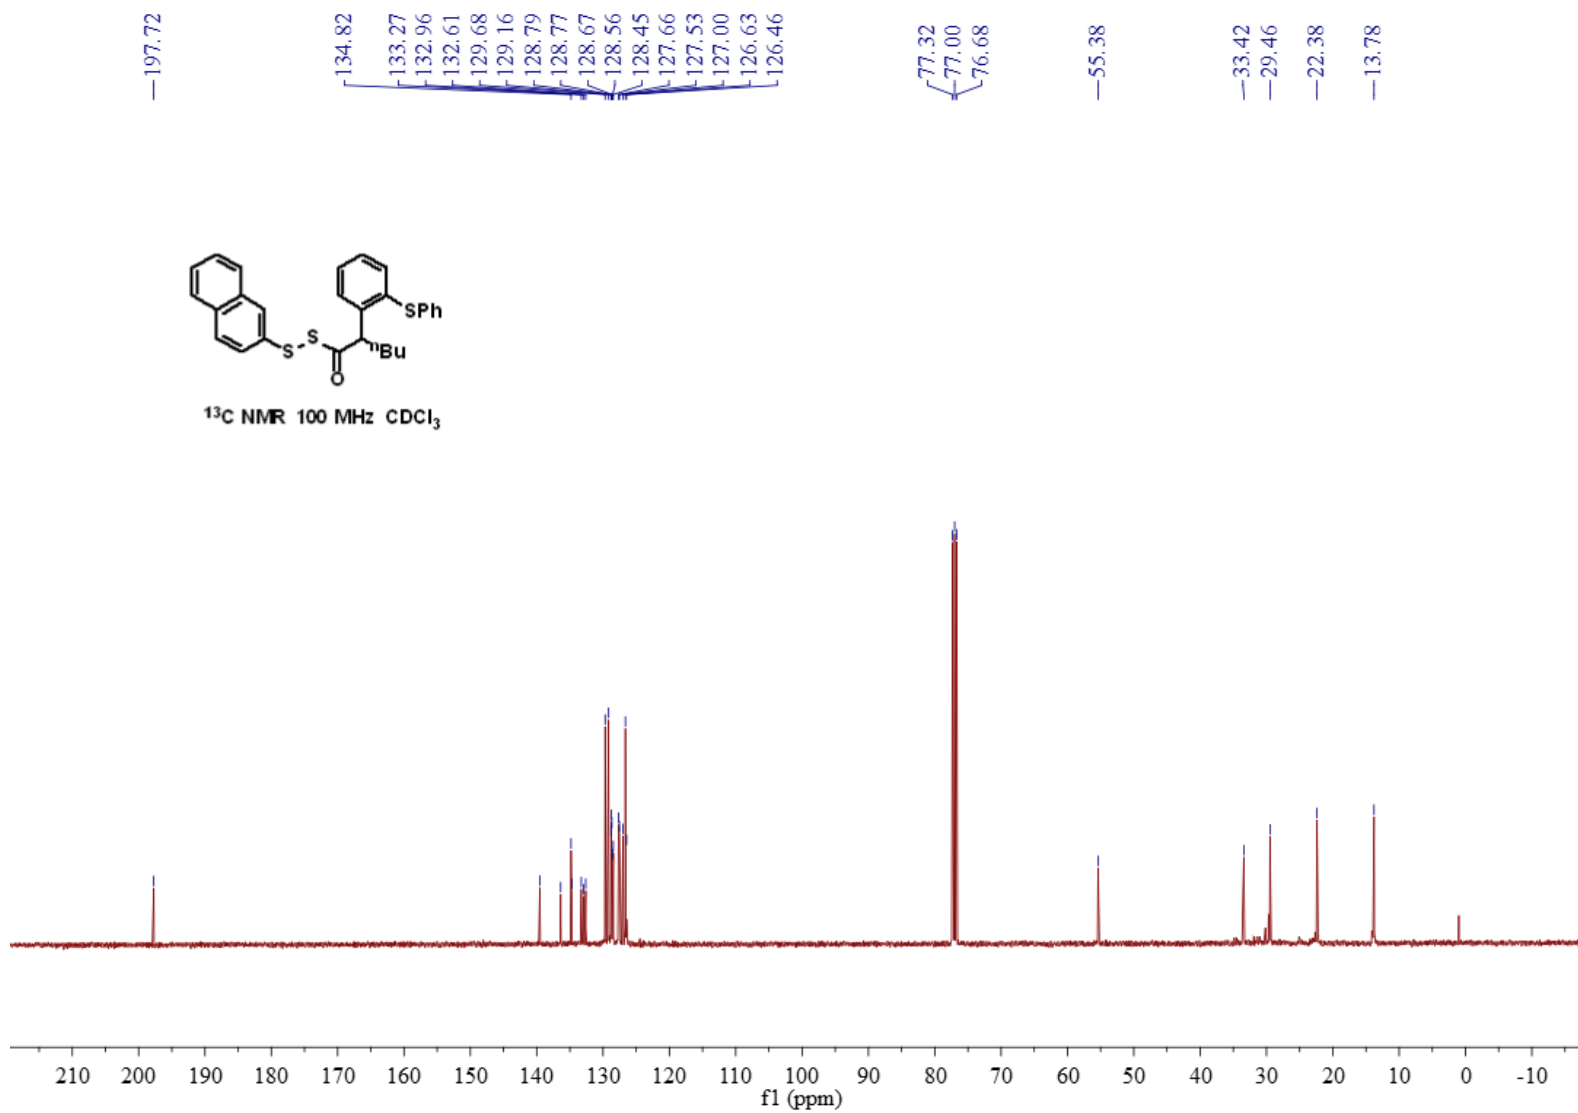

4g

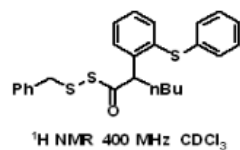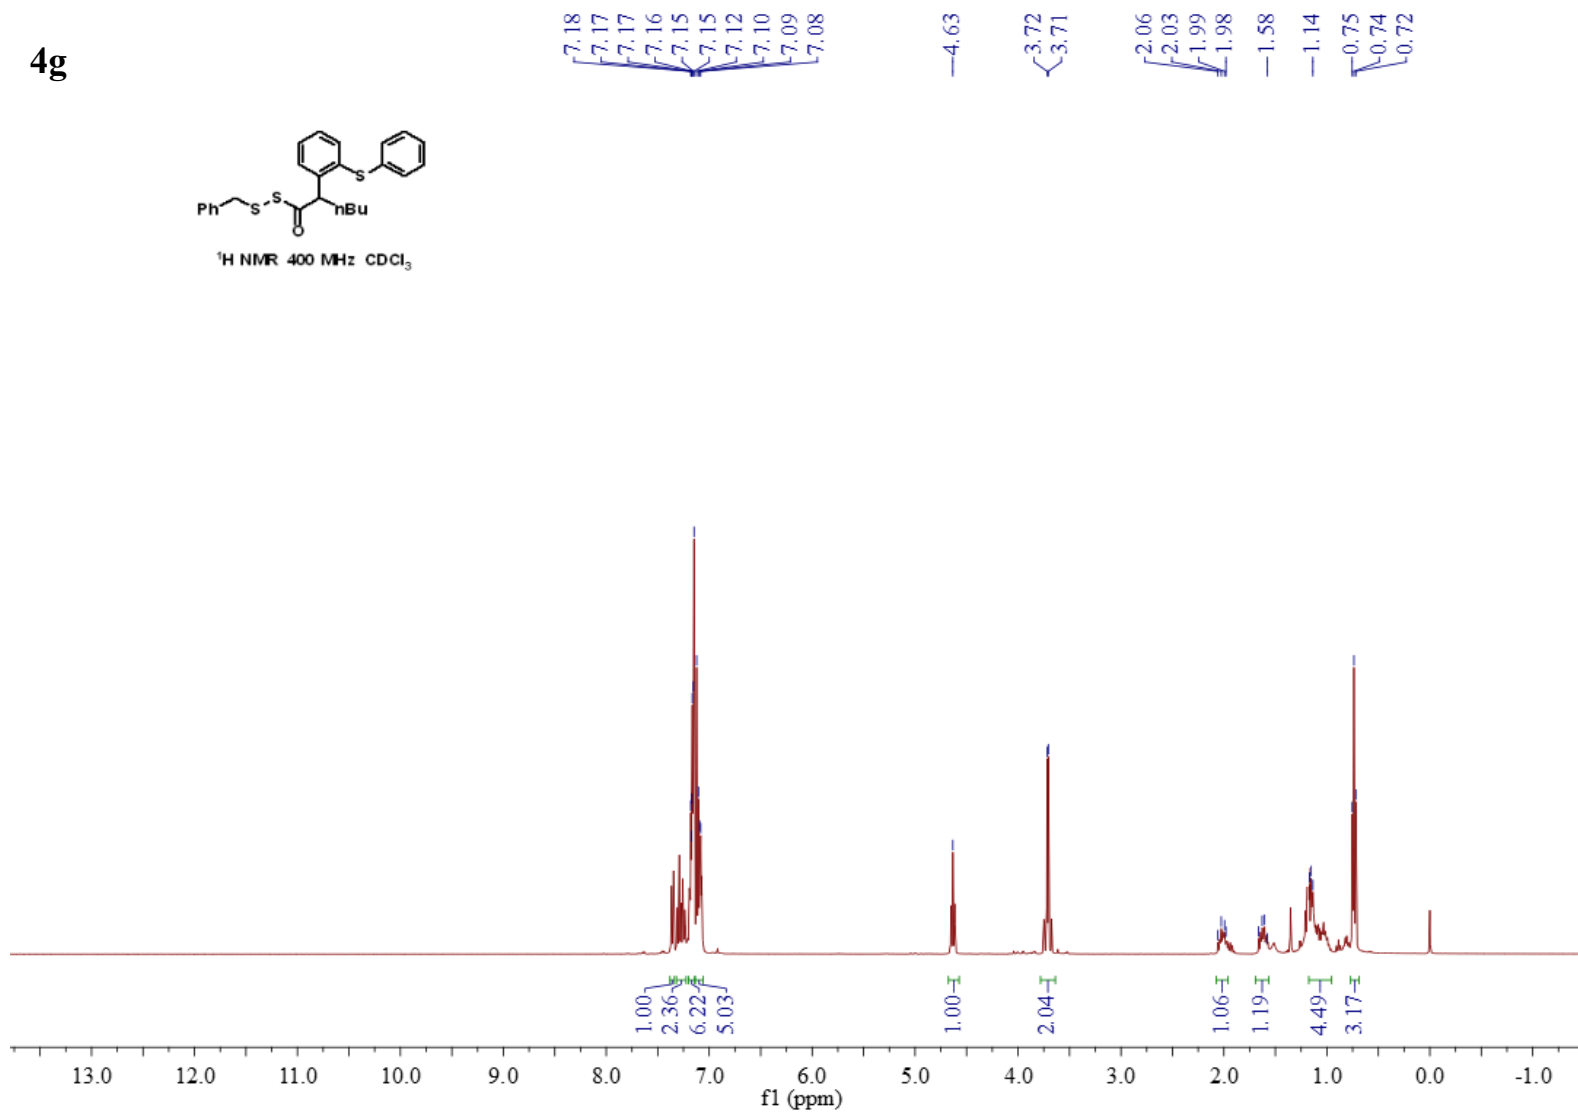

Copies of NMR spectra

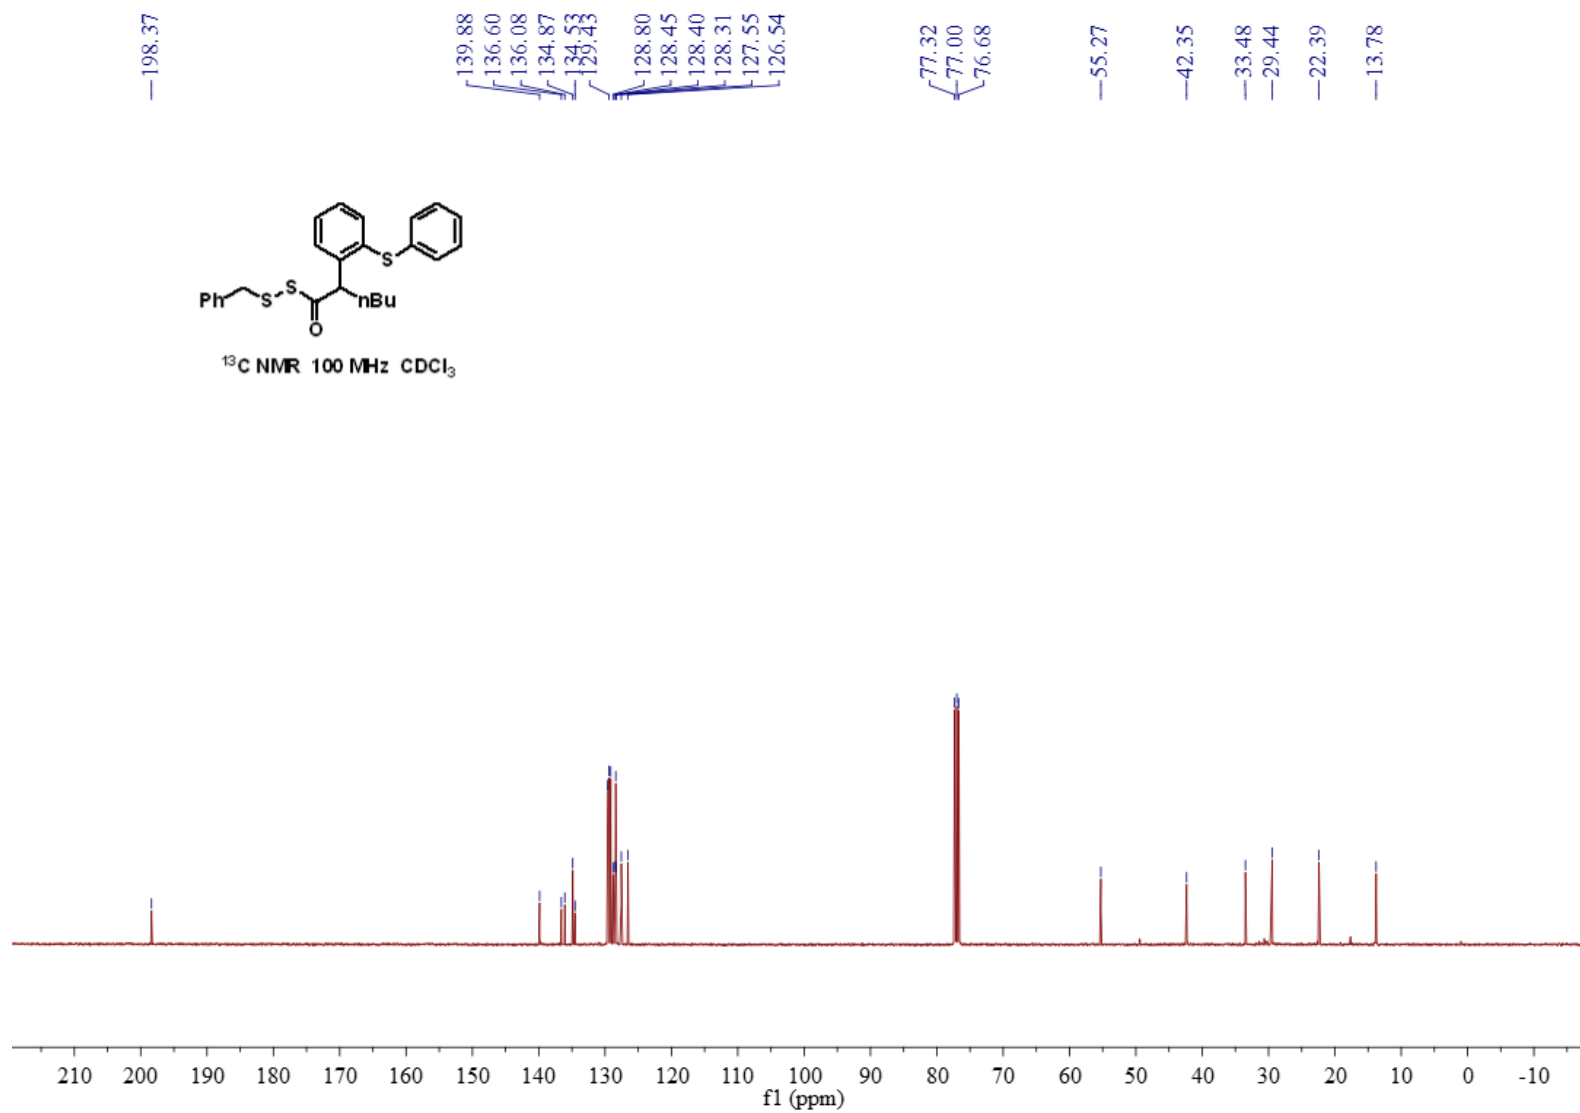



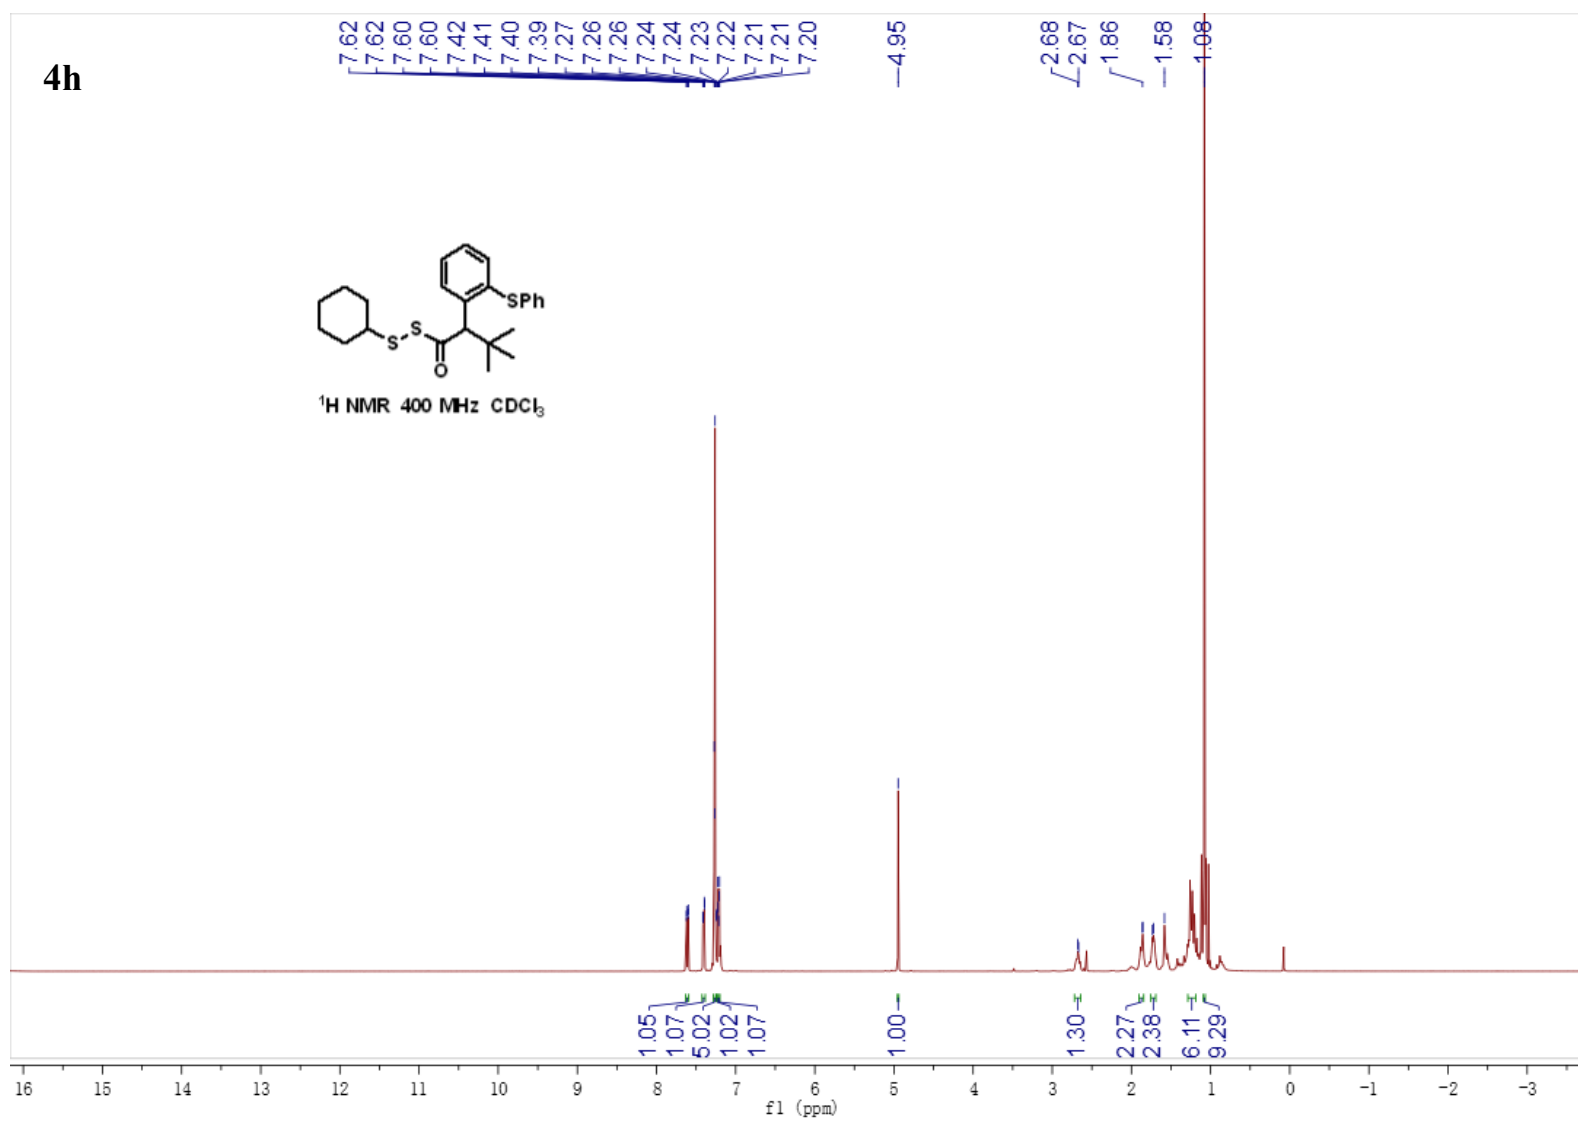

Copies of NMR spectra

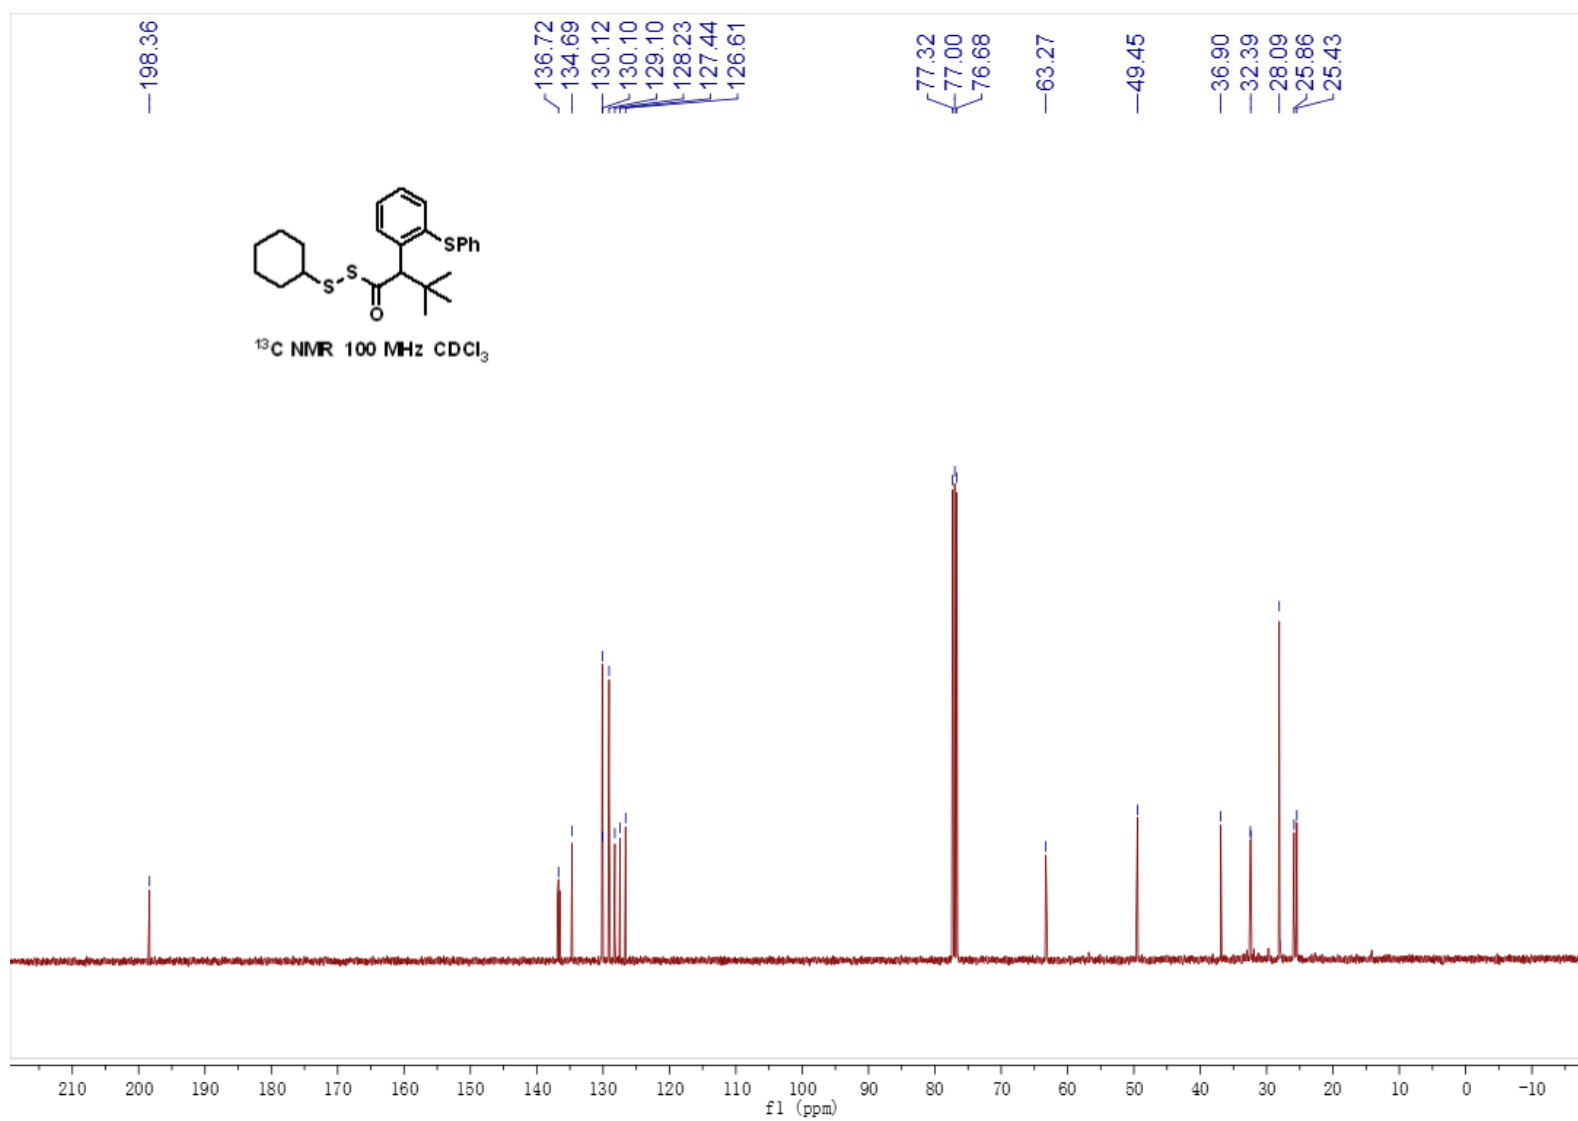

4i

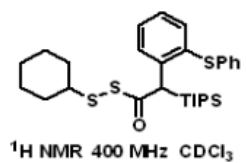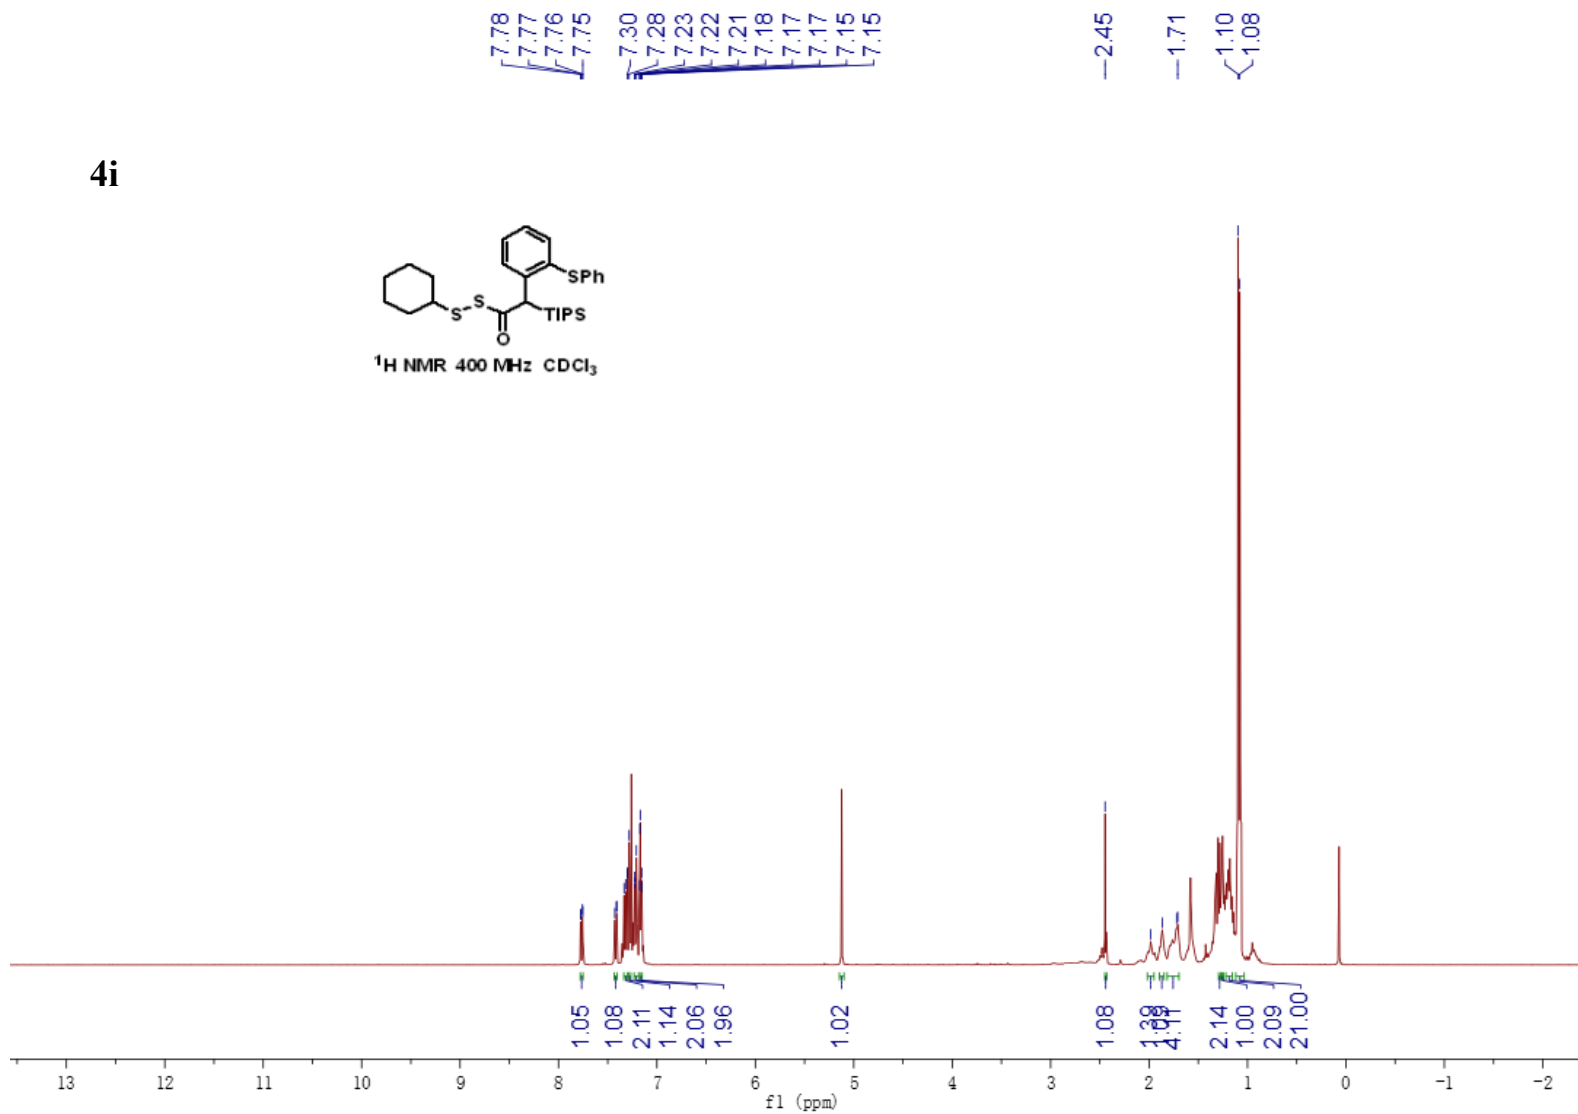

Copies of NMR spectra

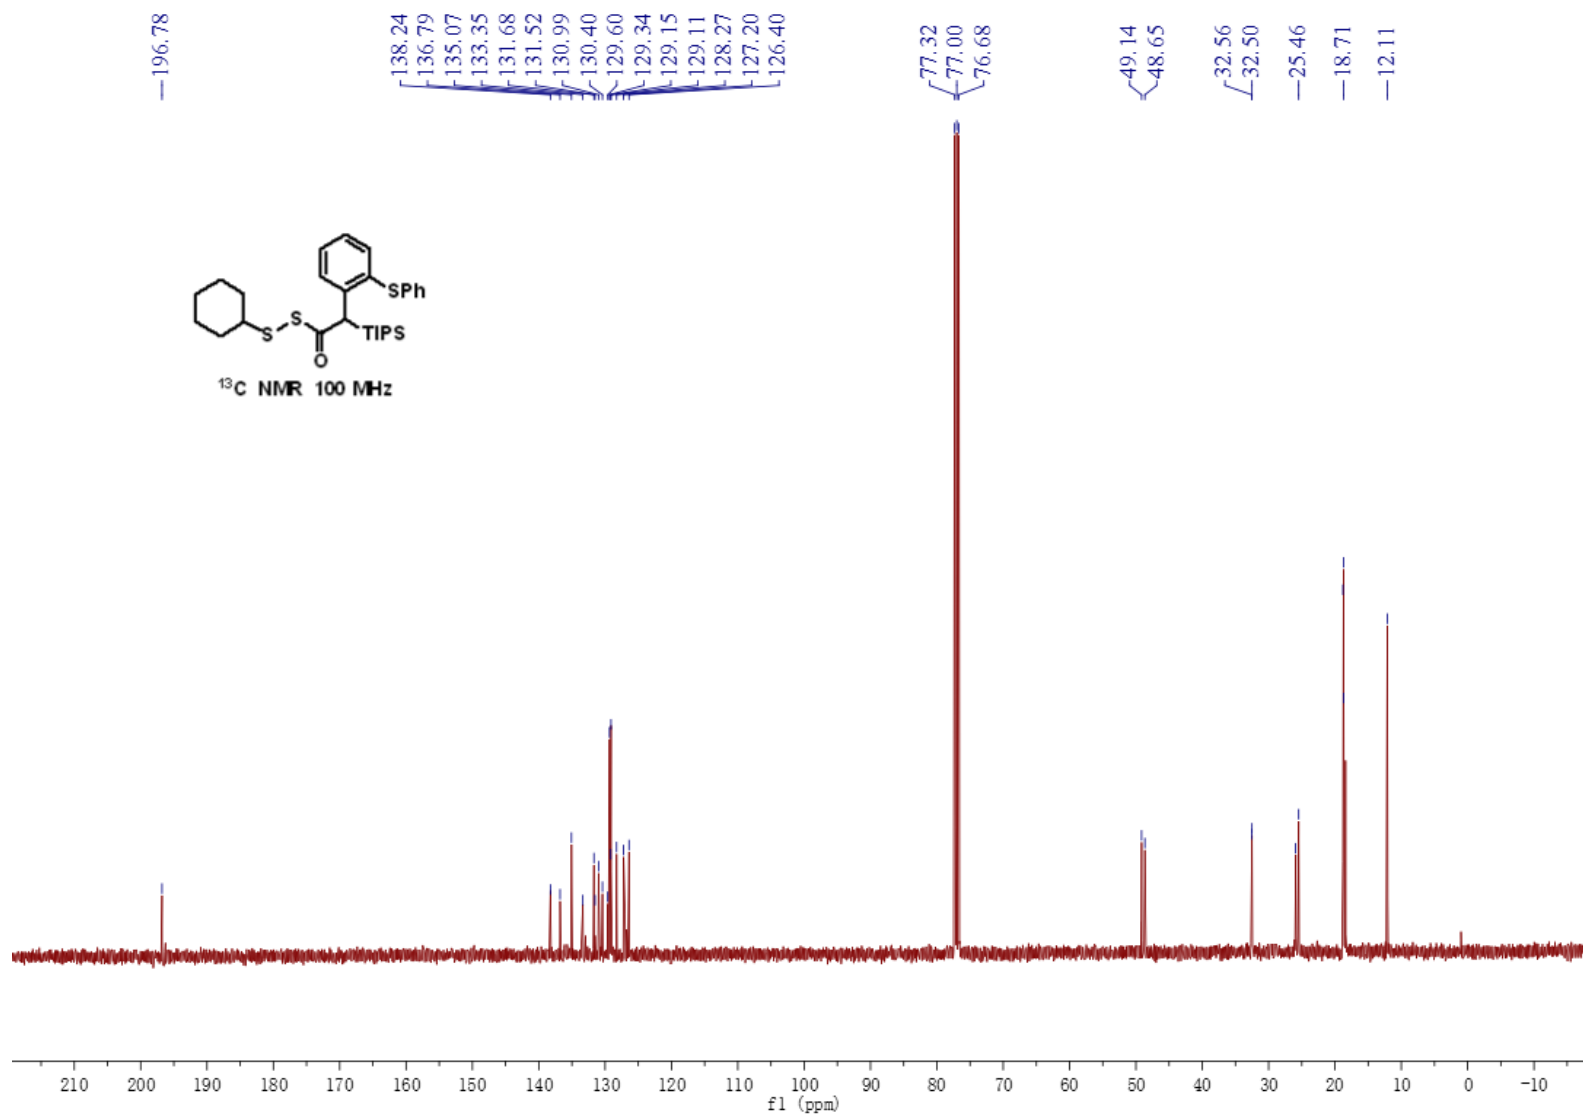

4j

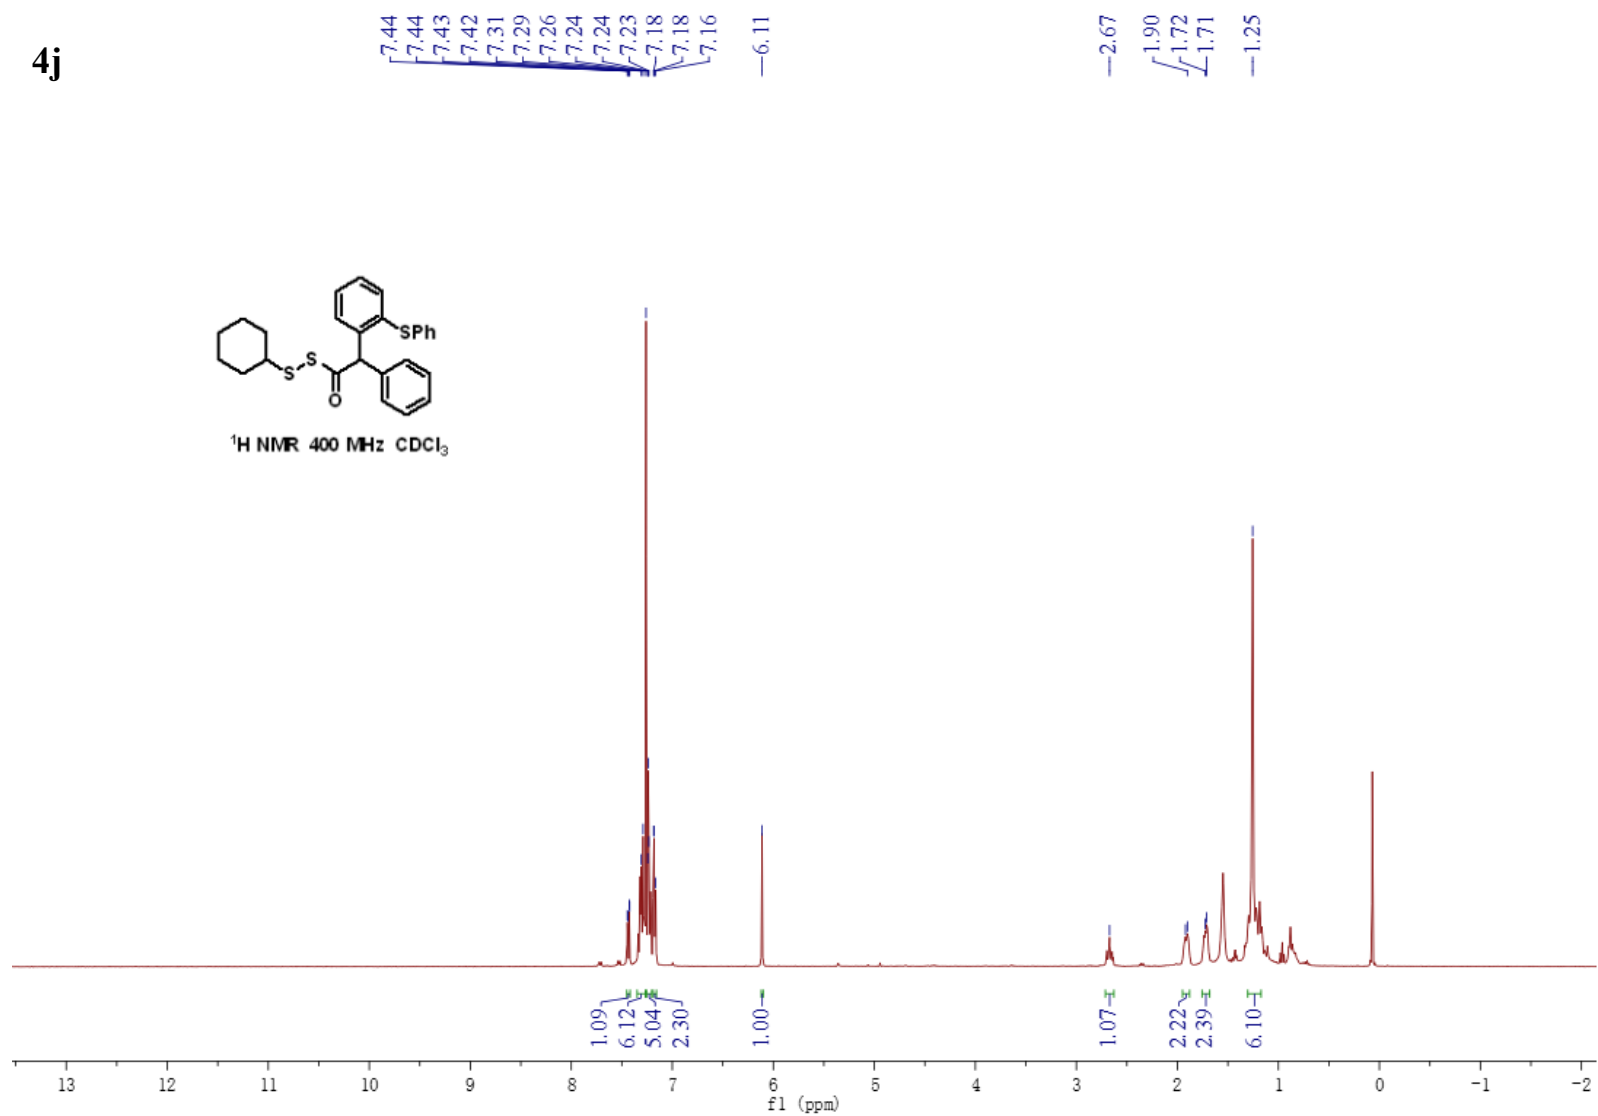

Copies of NMR spectra

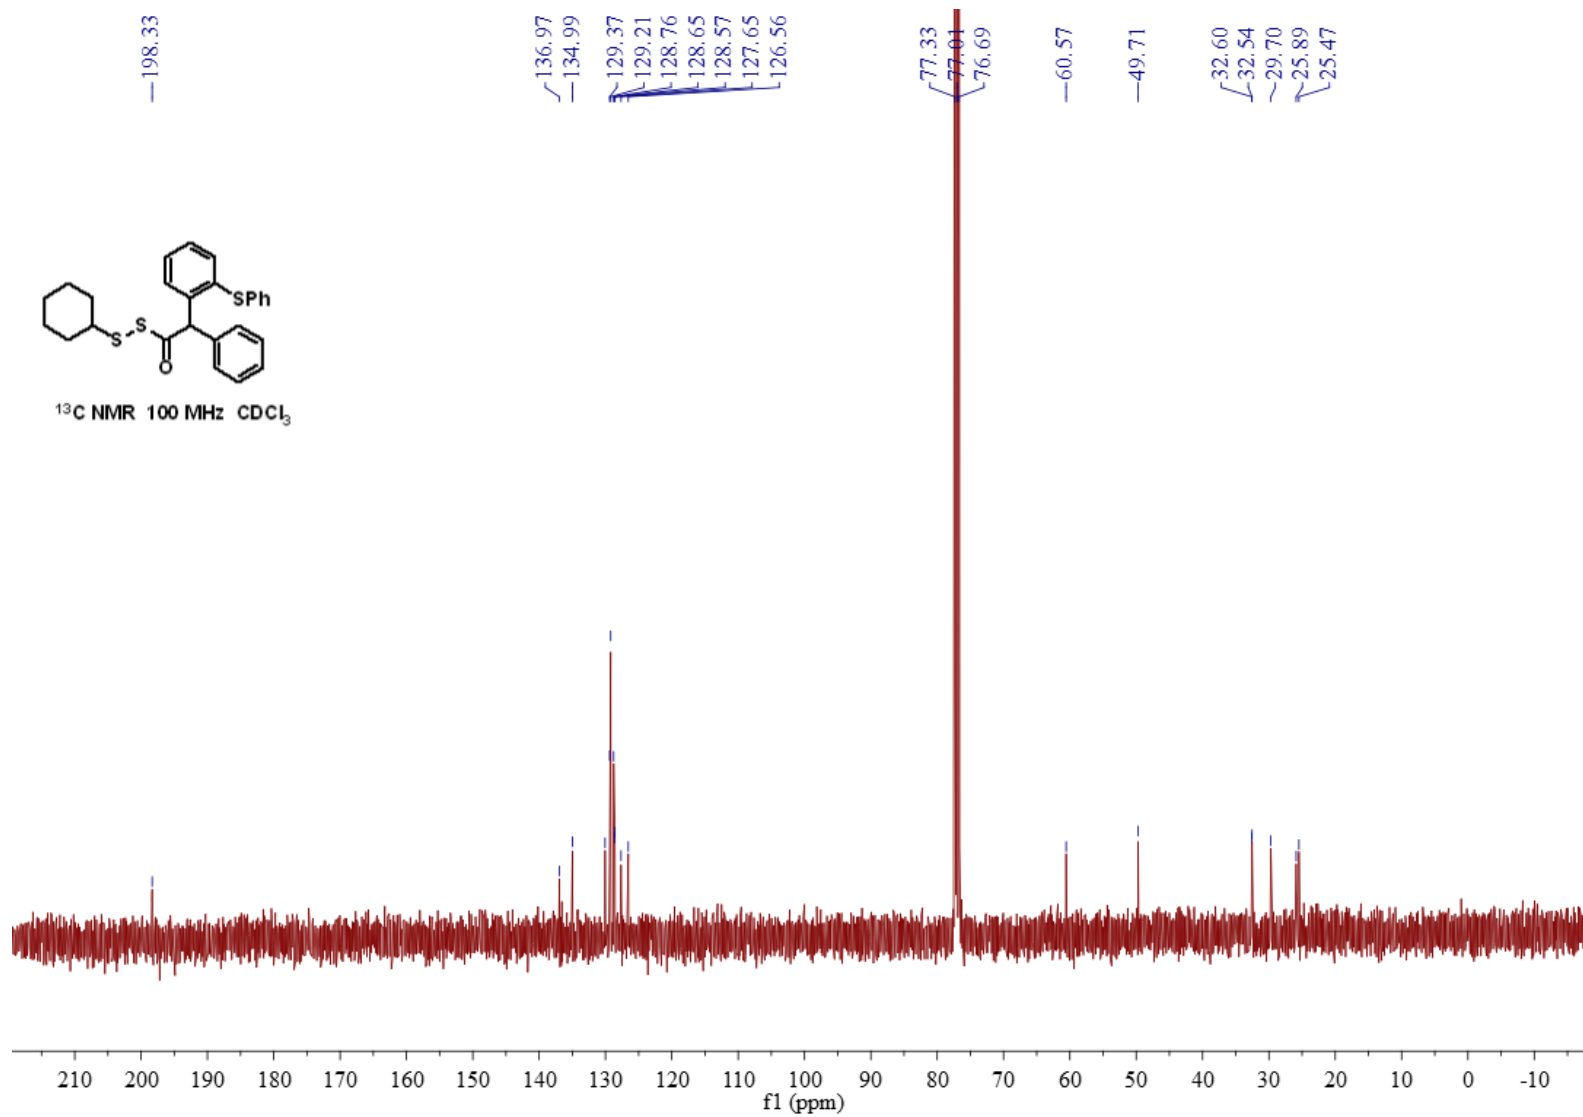

4k

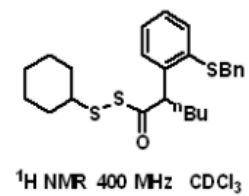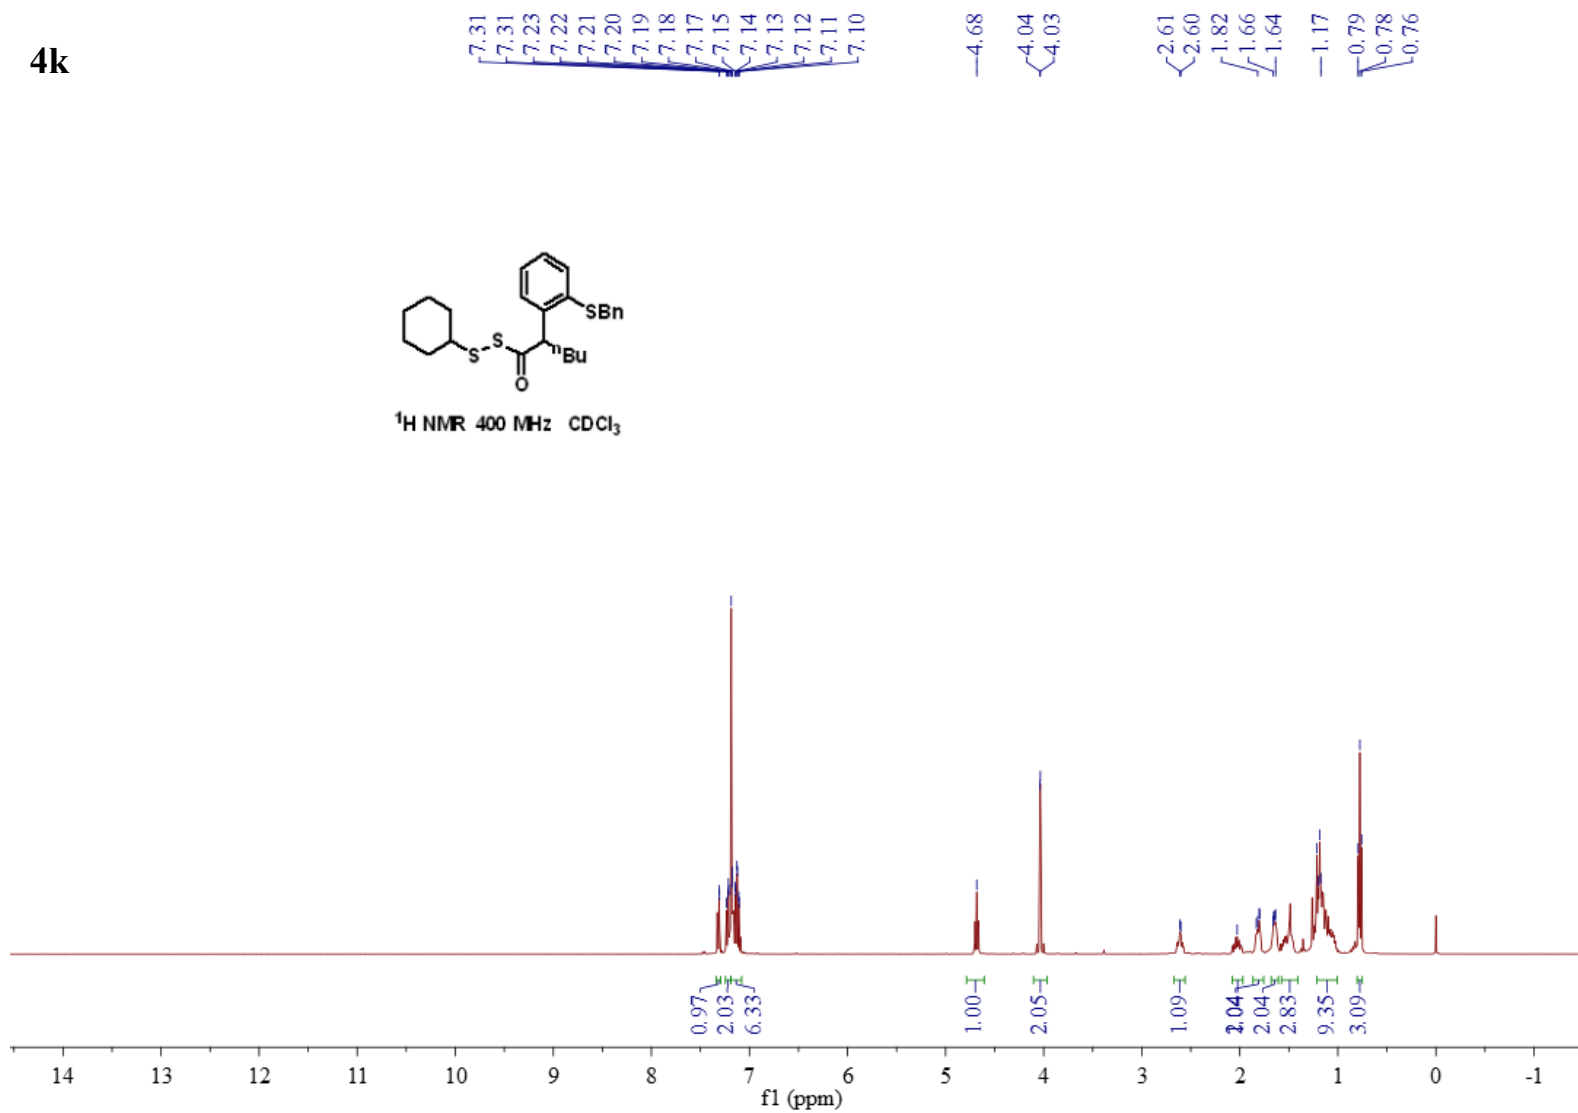

Copies of NMR spectra

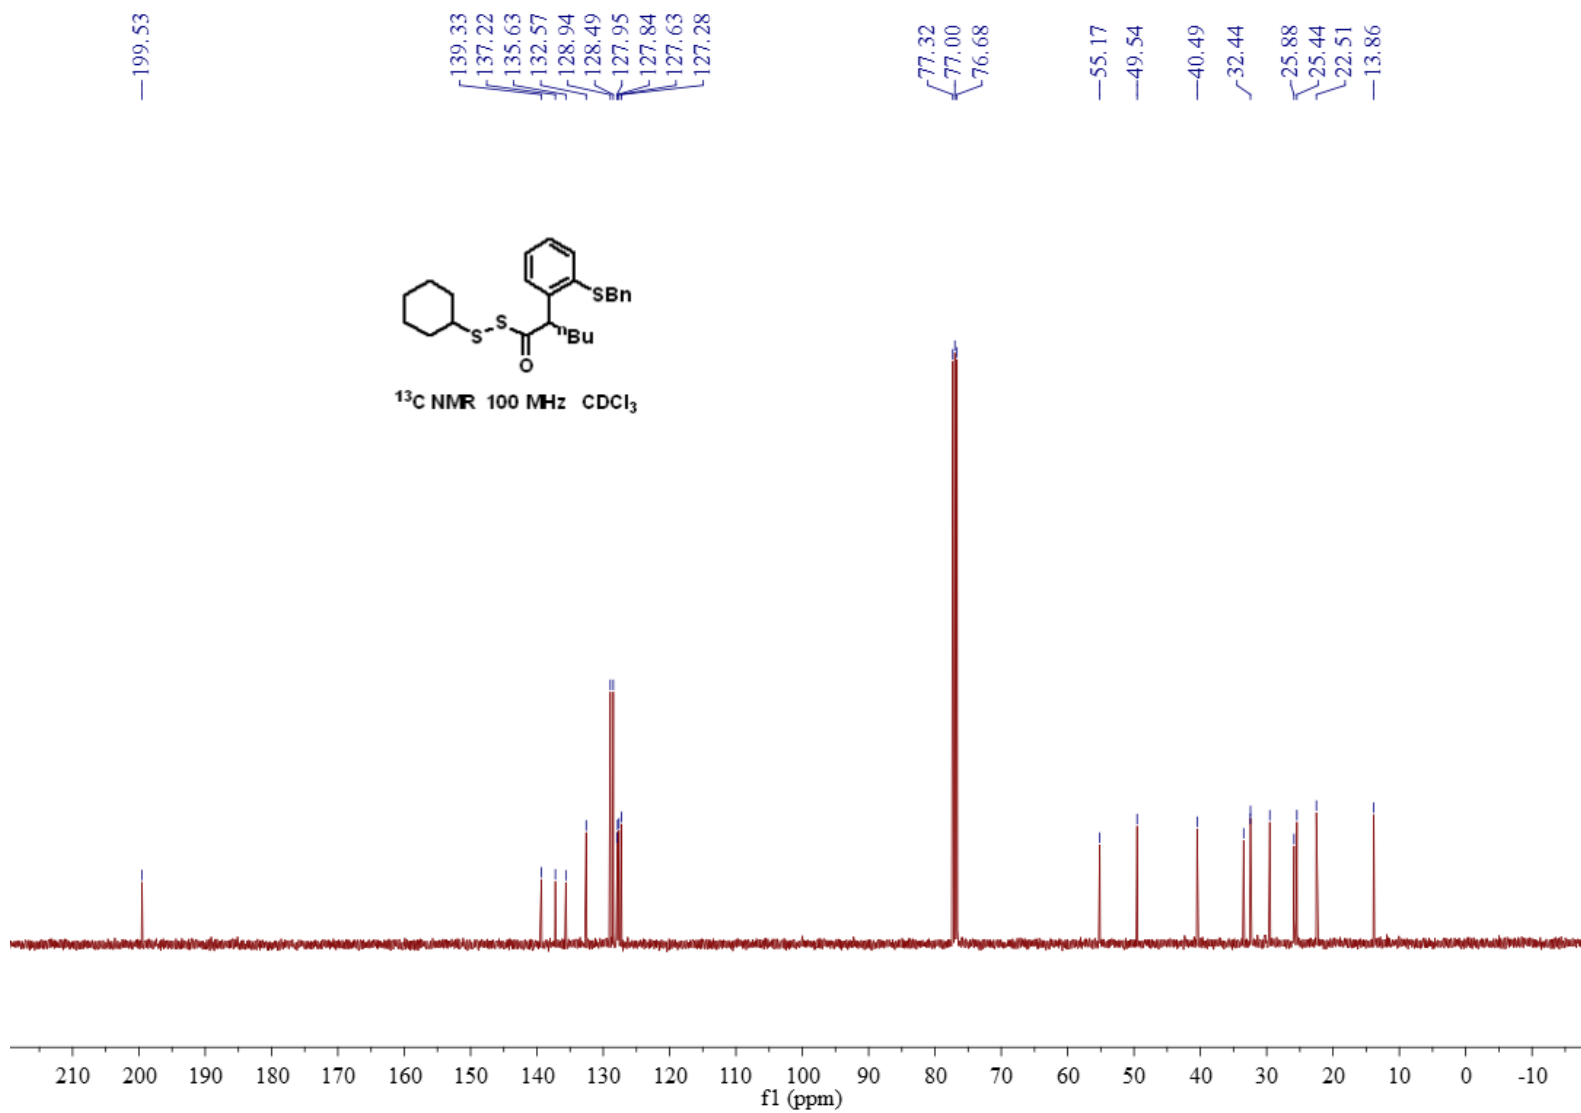



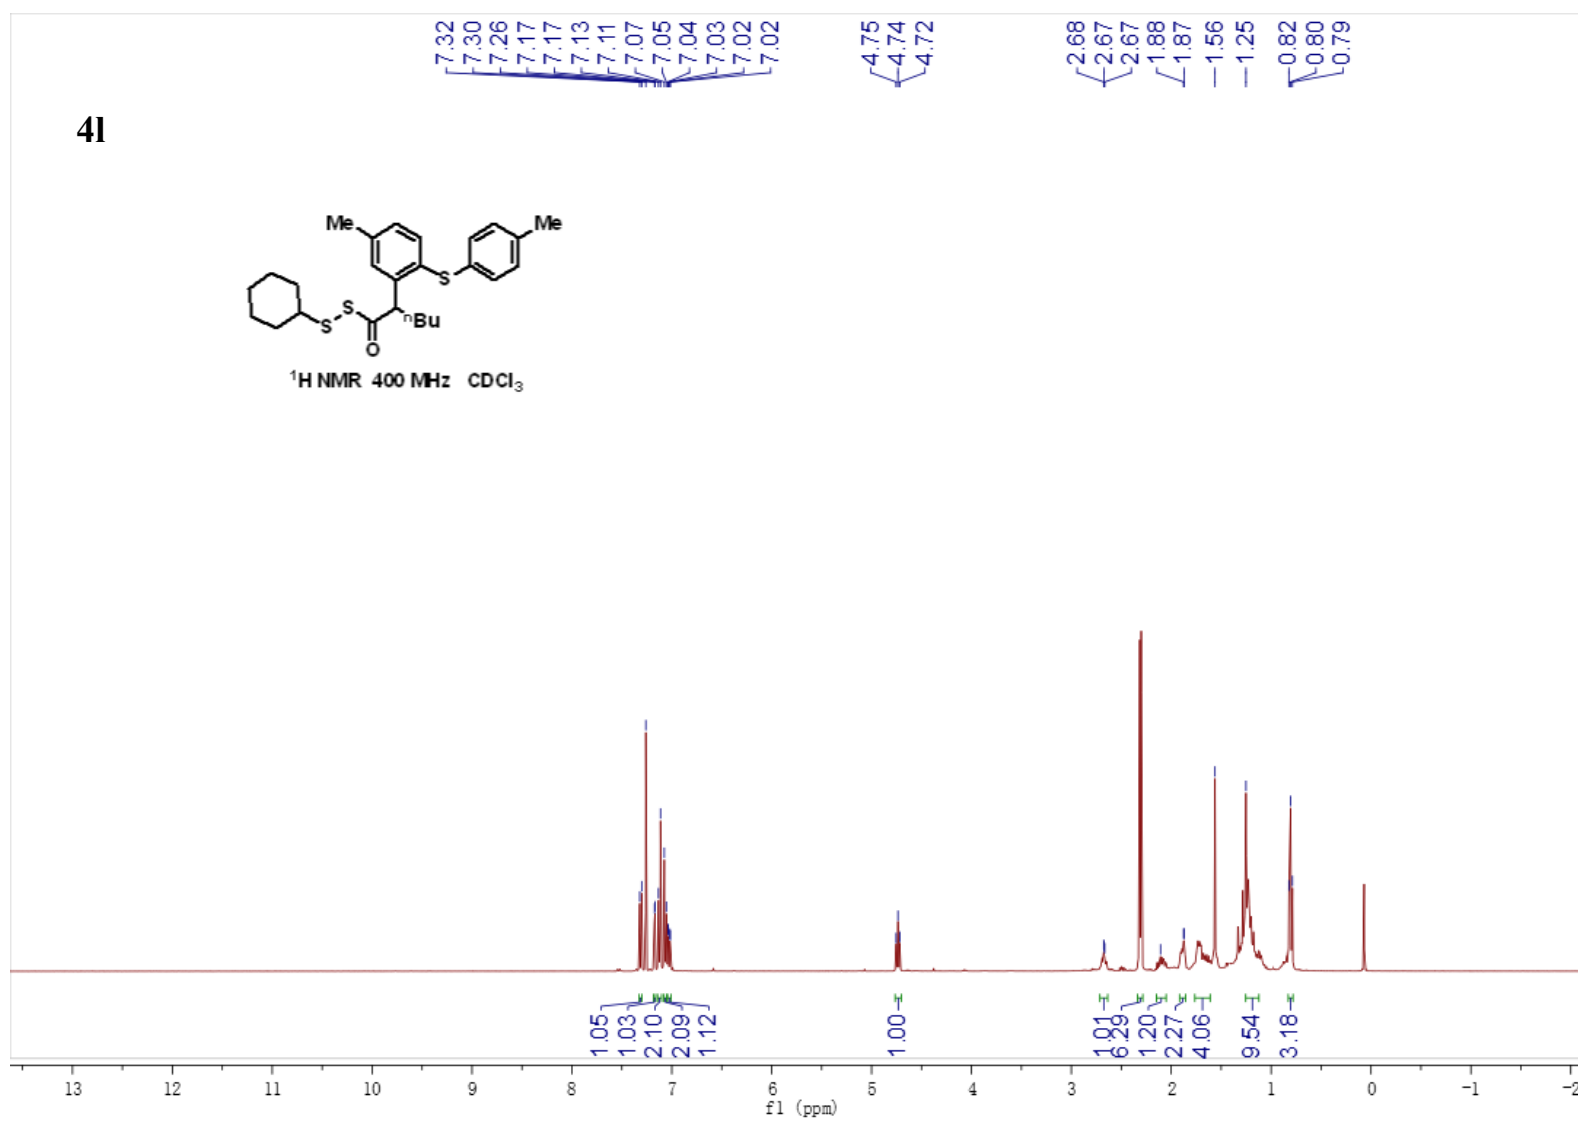

Copies of NMR spectra

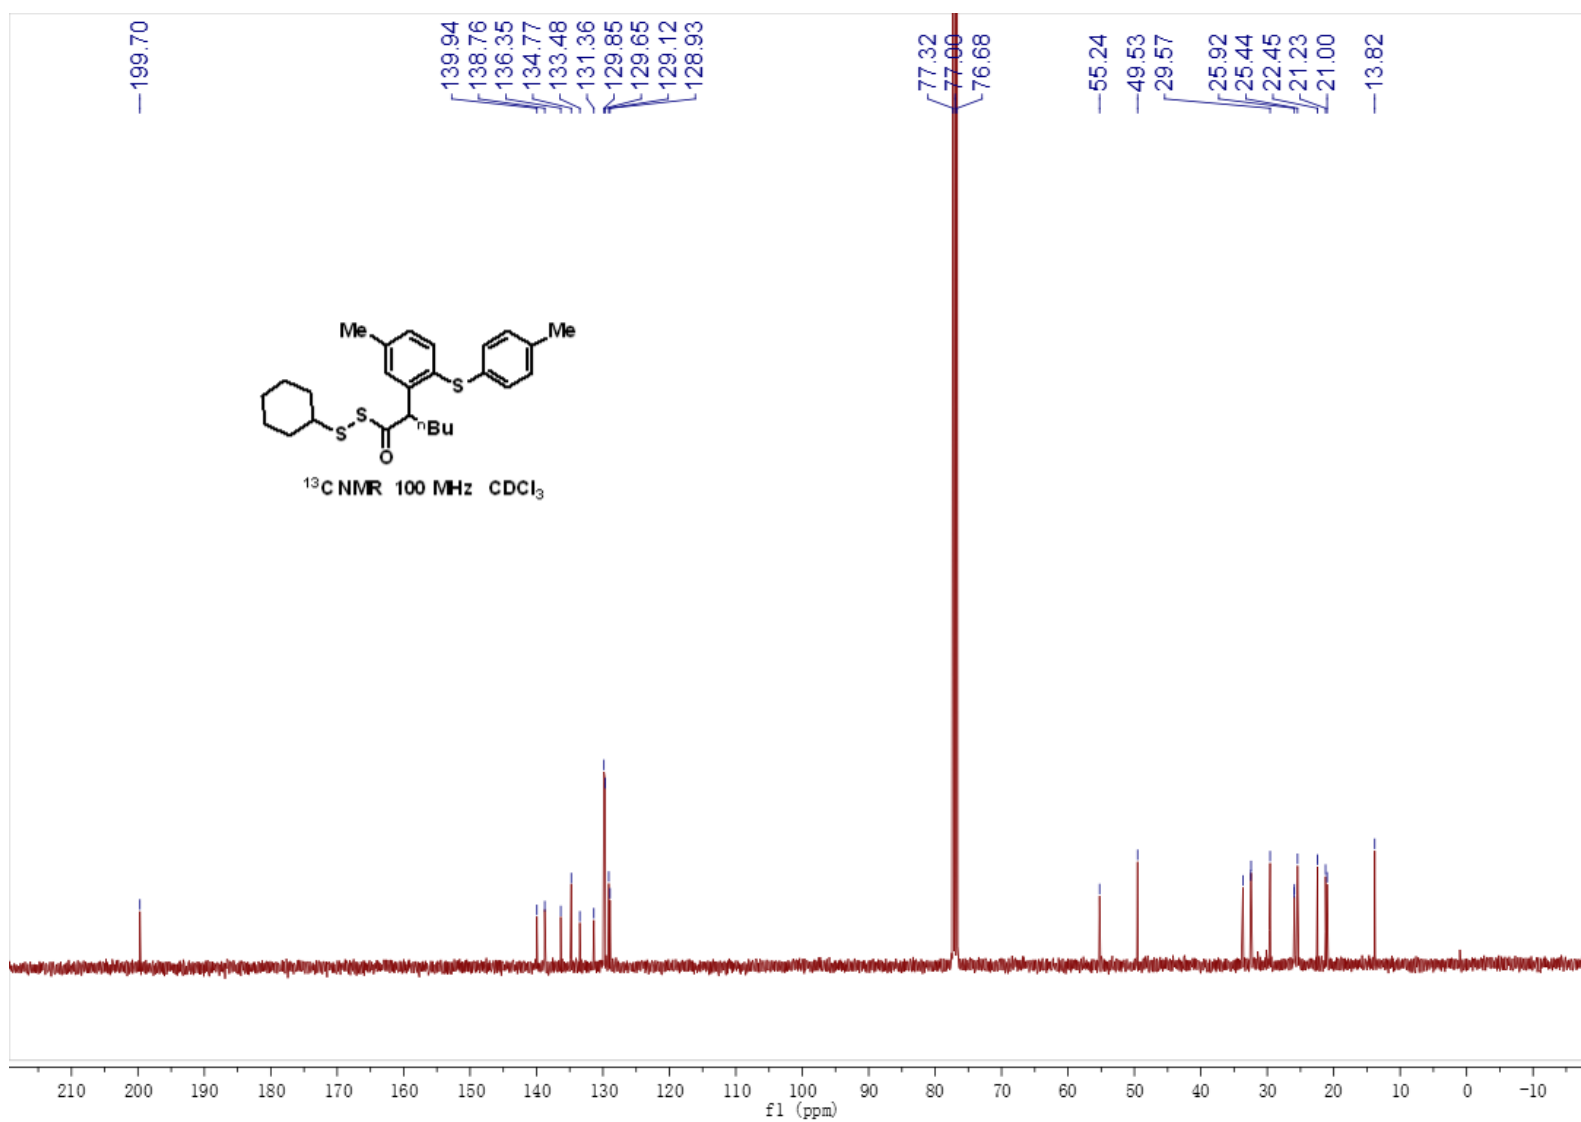

4m

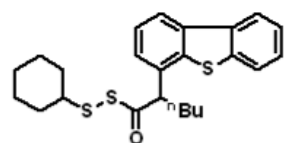

<sup>1</sup>H NMR 400 MHz CDCl<sub>3</sub>

8.17  
8.15  
8.15  
8.11  
8.10  
8.09  
8.09  
7.90  
7.87  
7.48  
7.47  
7.47  
7.46  
7.46  
7.45  
7.26  
-4.24  
-2.65  
1.57  
1.35  
1.34  
0.88  
0.86  
0.84

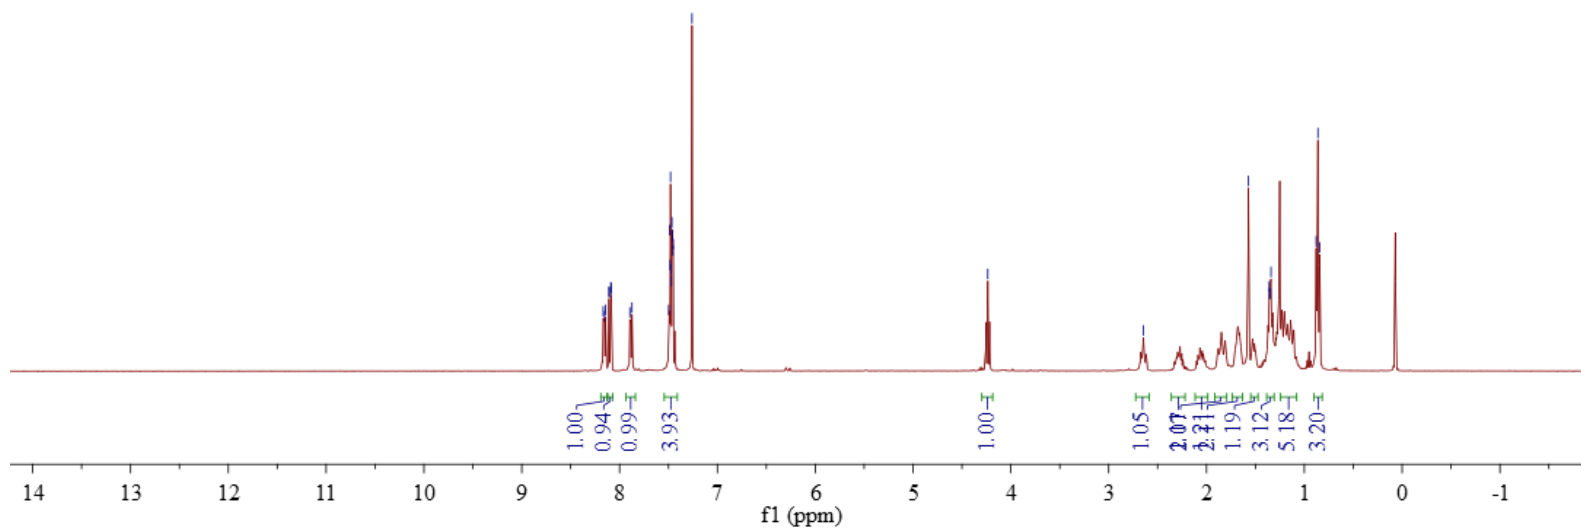

Copies of NMR spectra

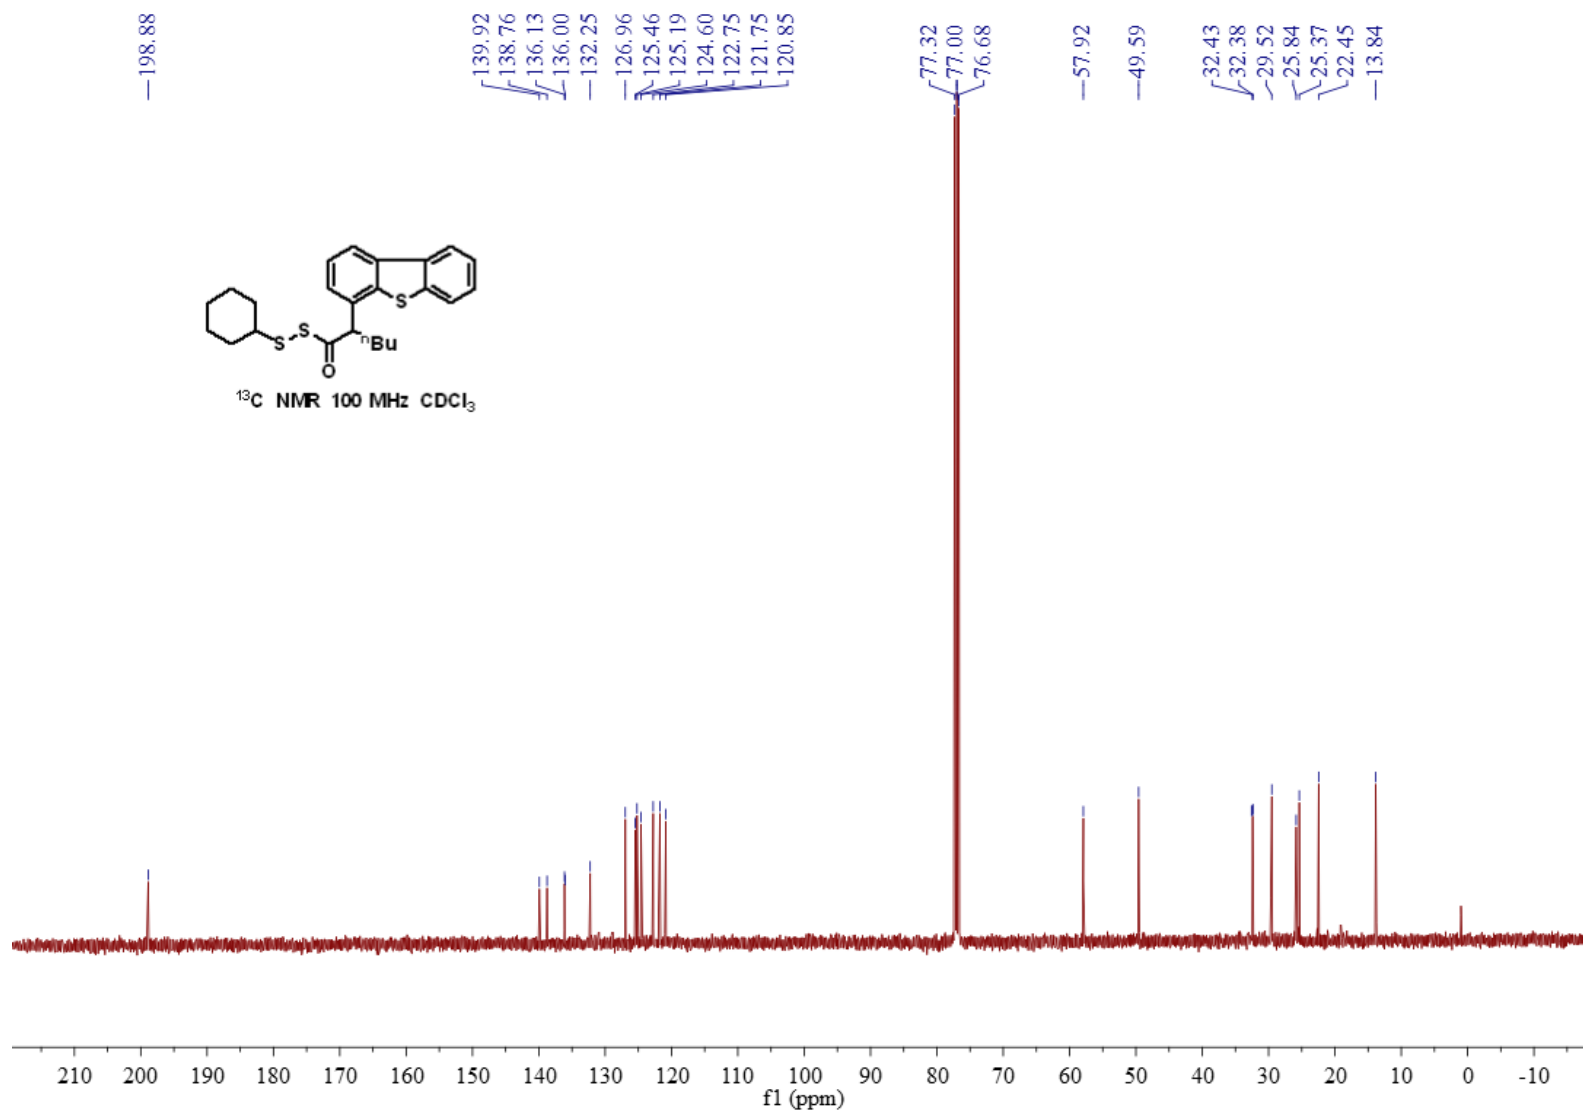

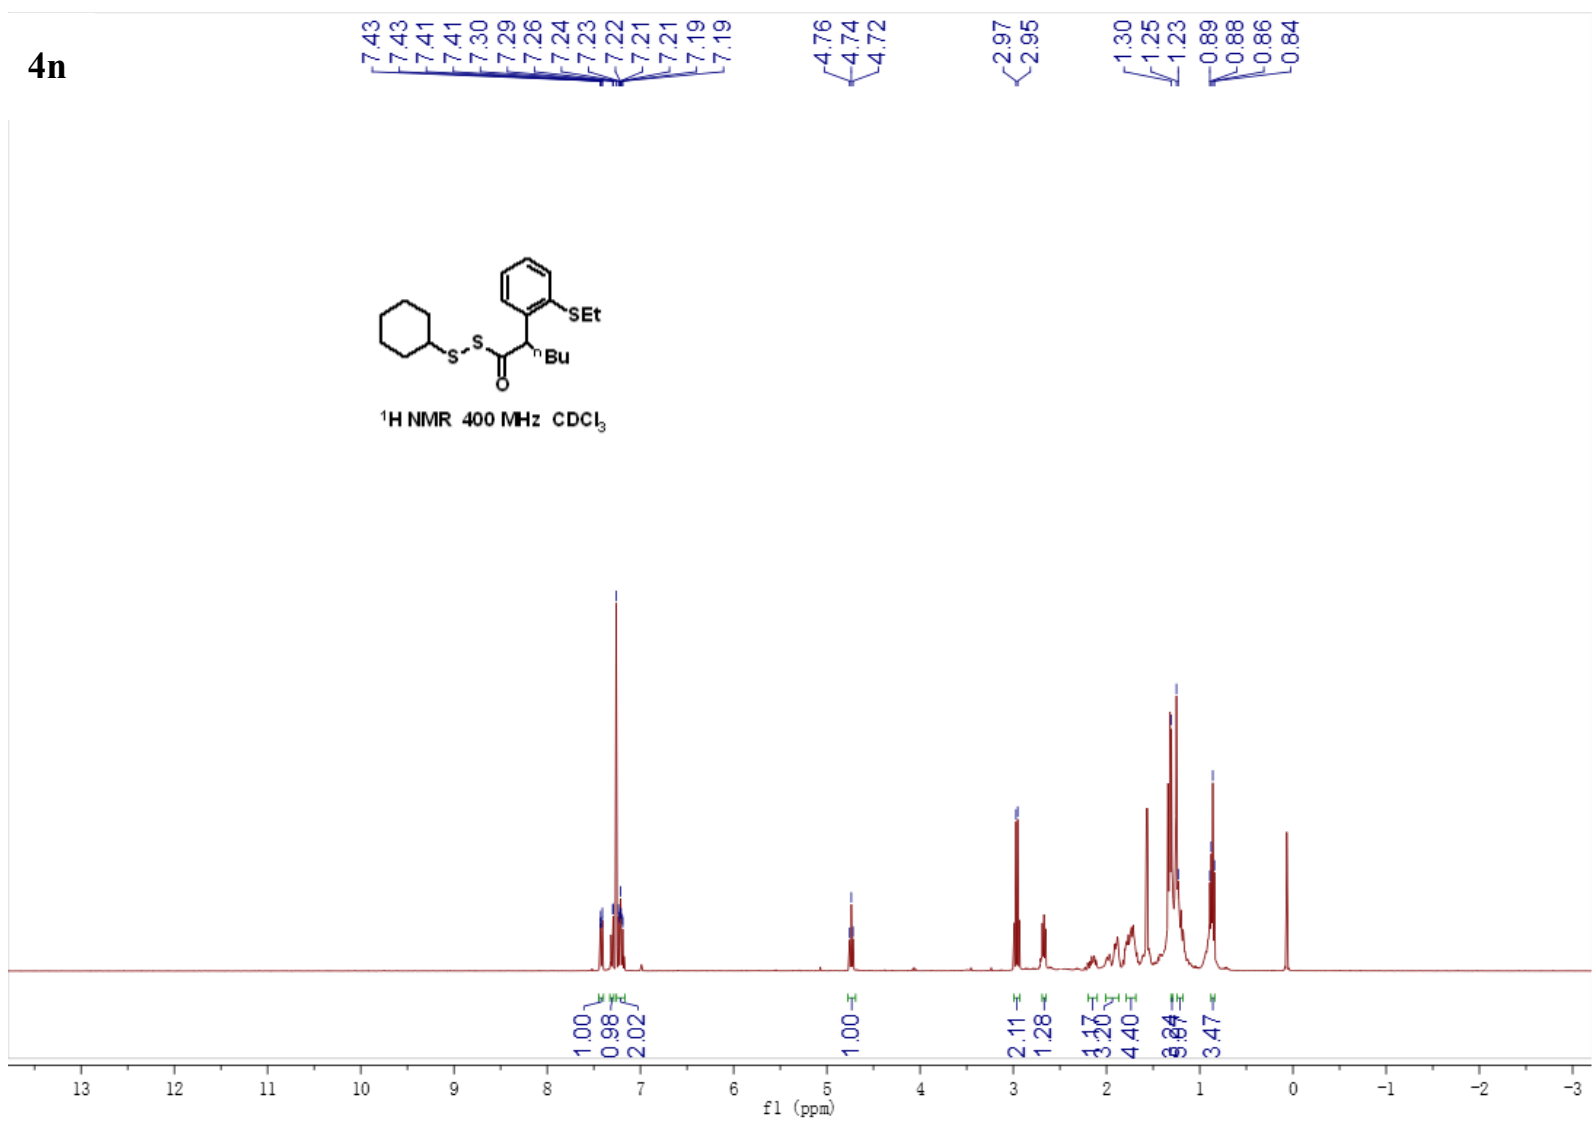

Copies of NMR spectra

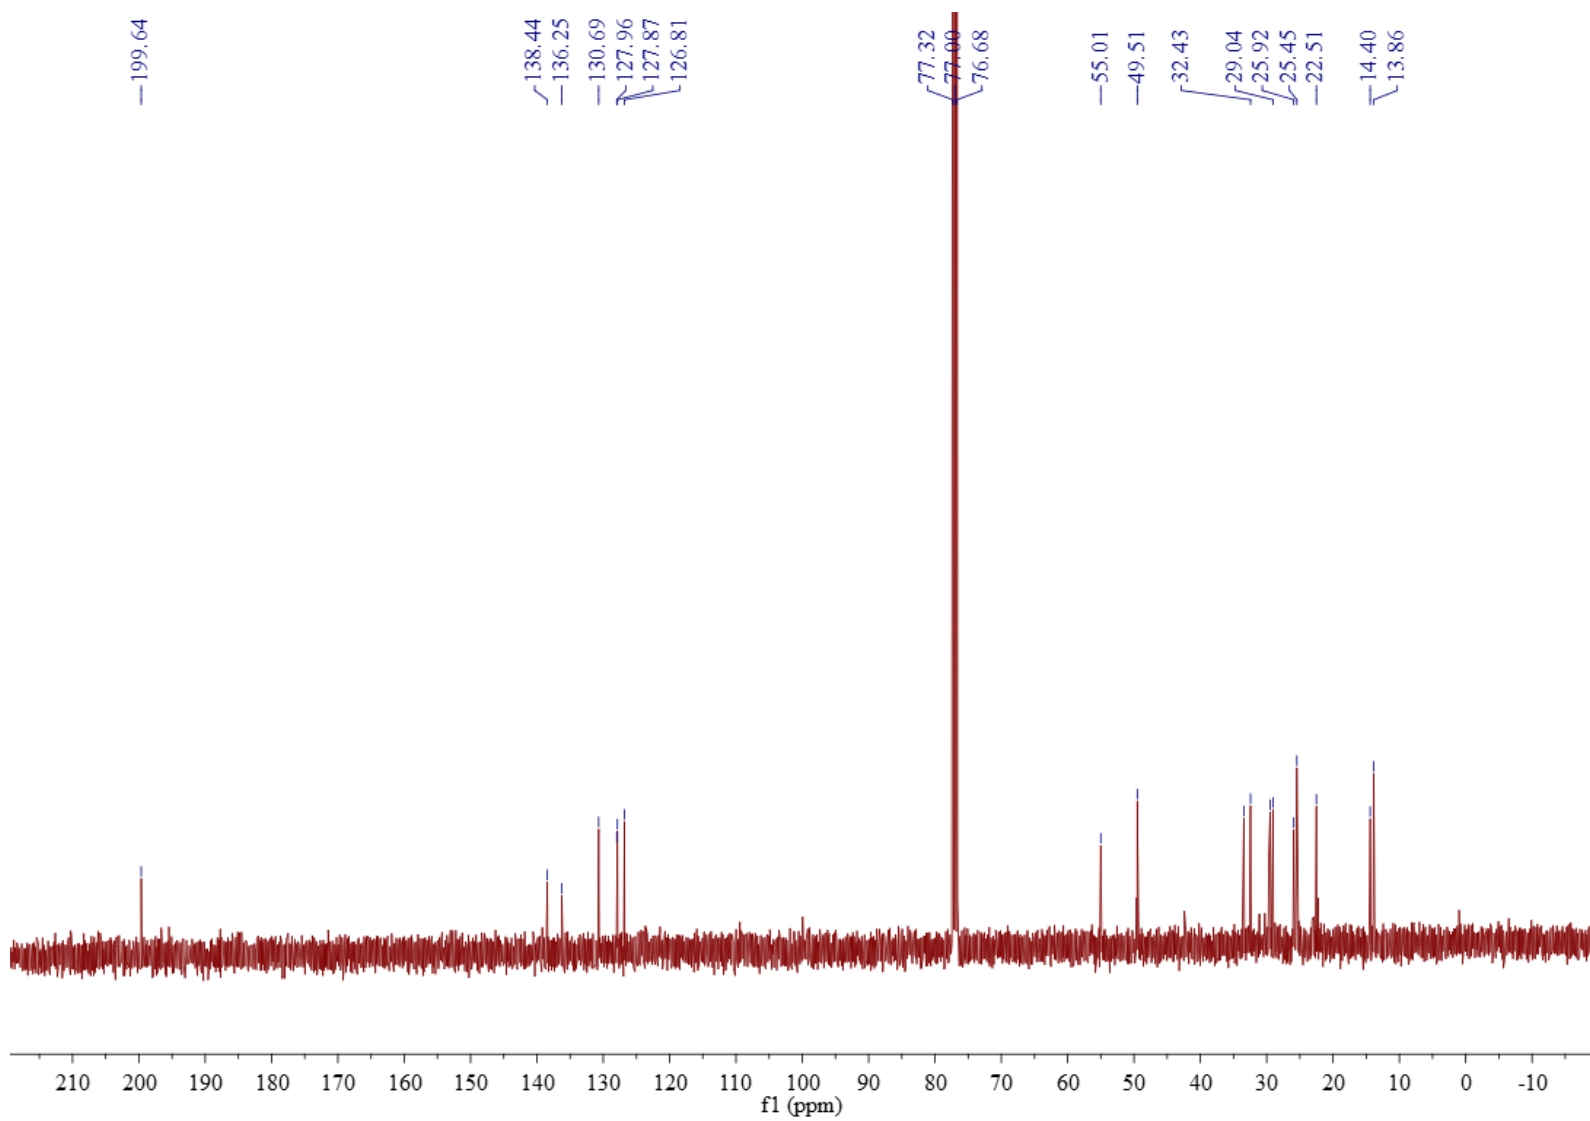

40

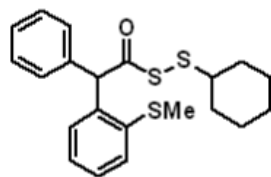

<sup>1</sup>H NMR 400 MHz

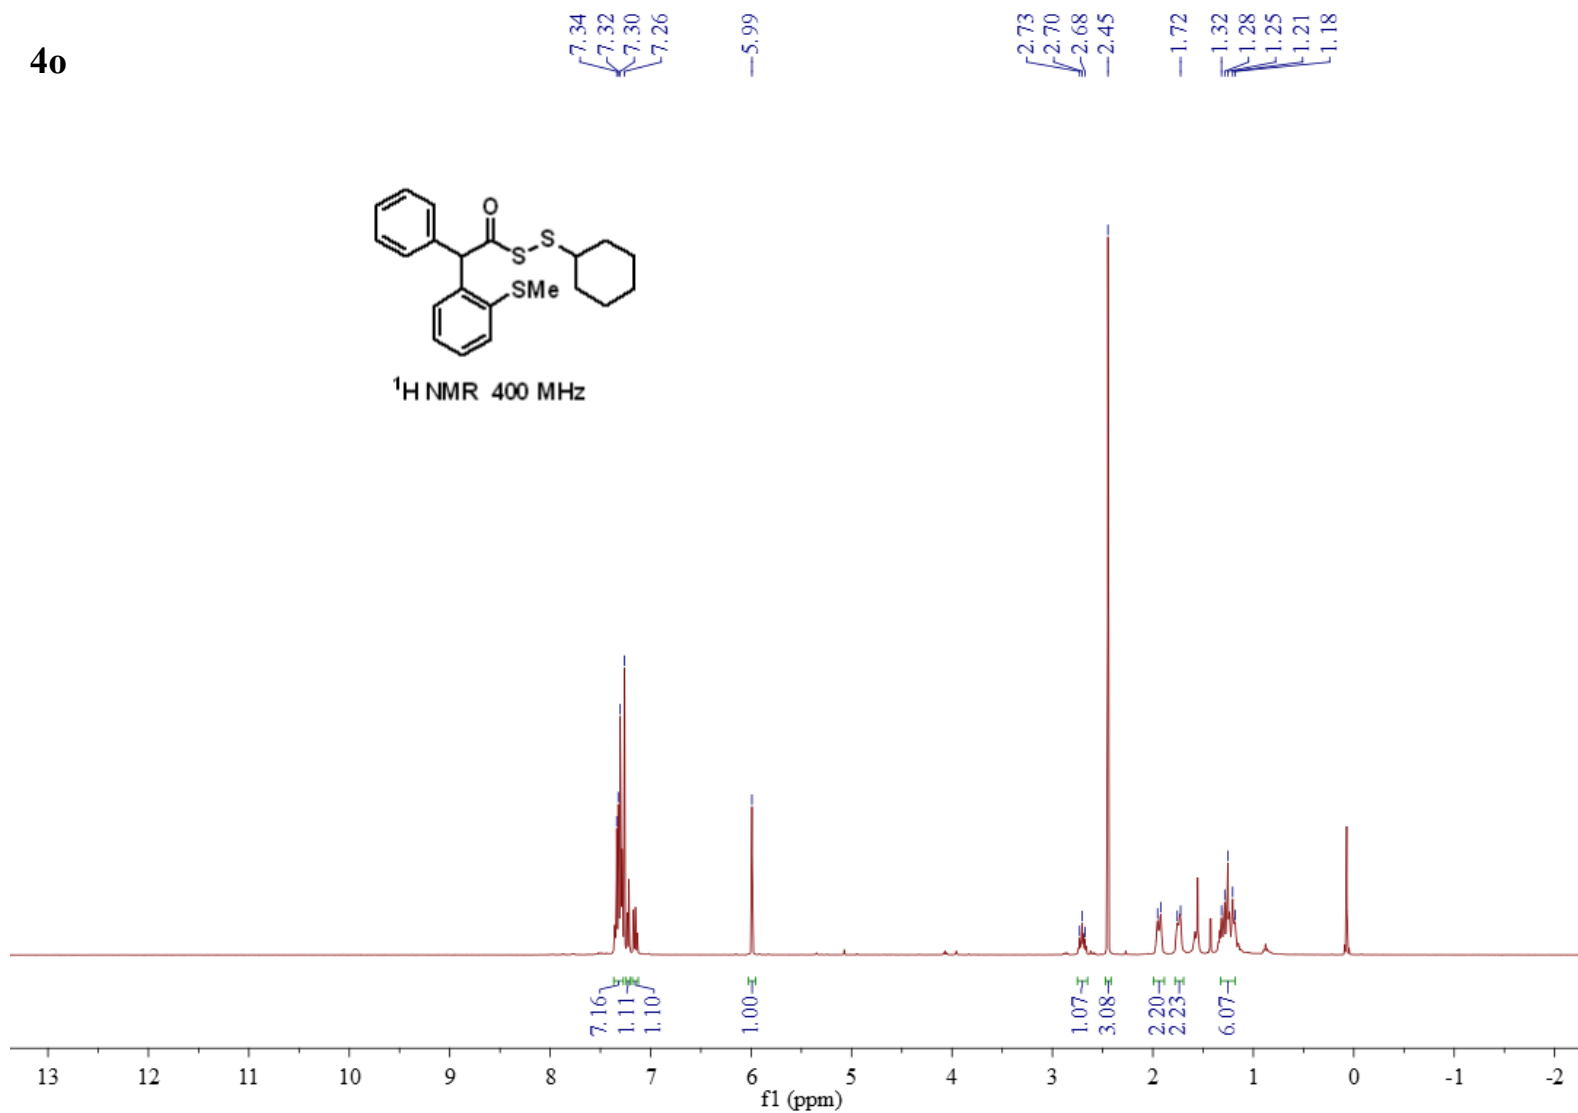

Copies of NMR spectra

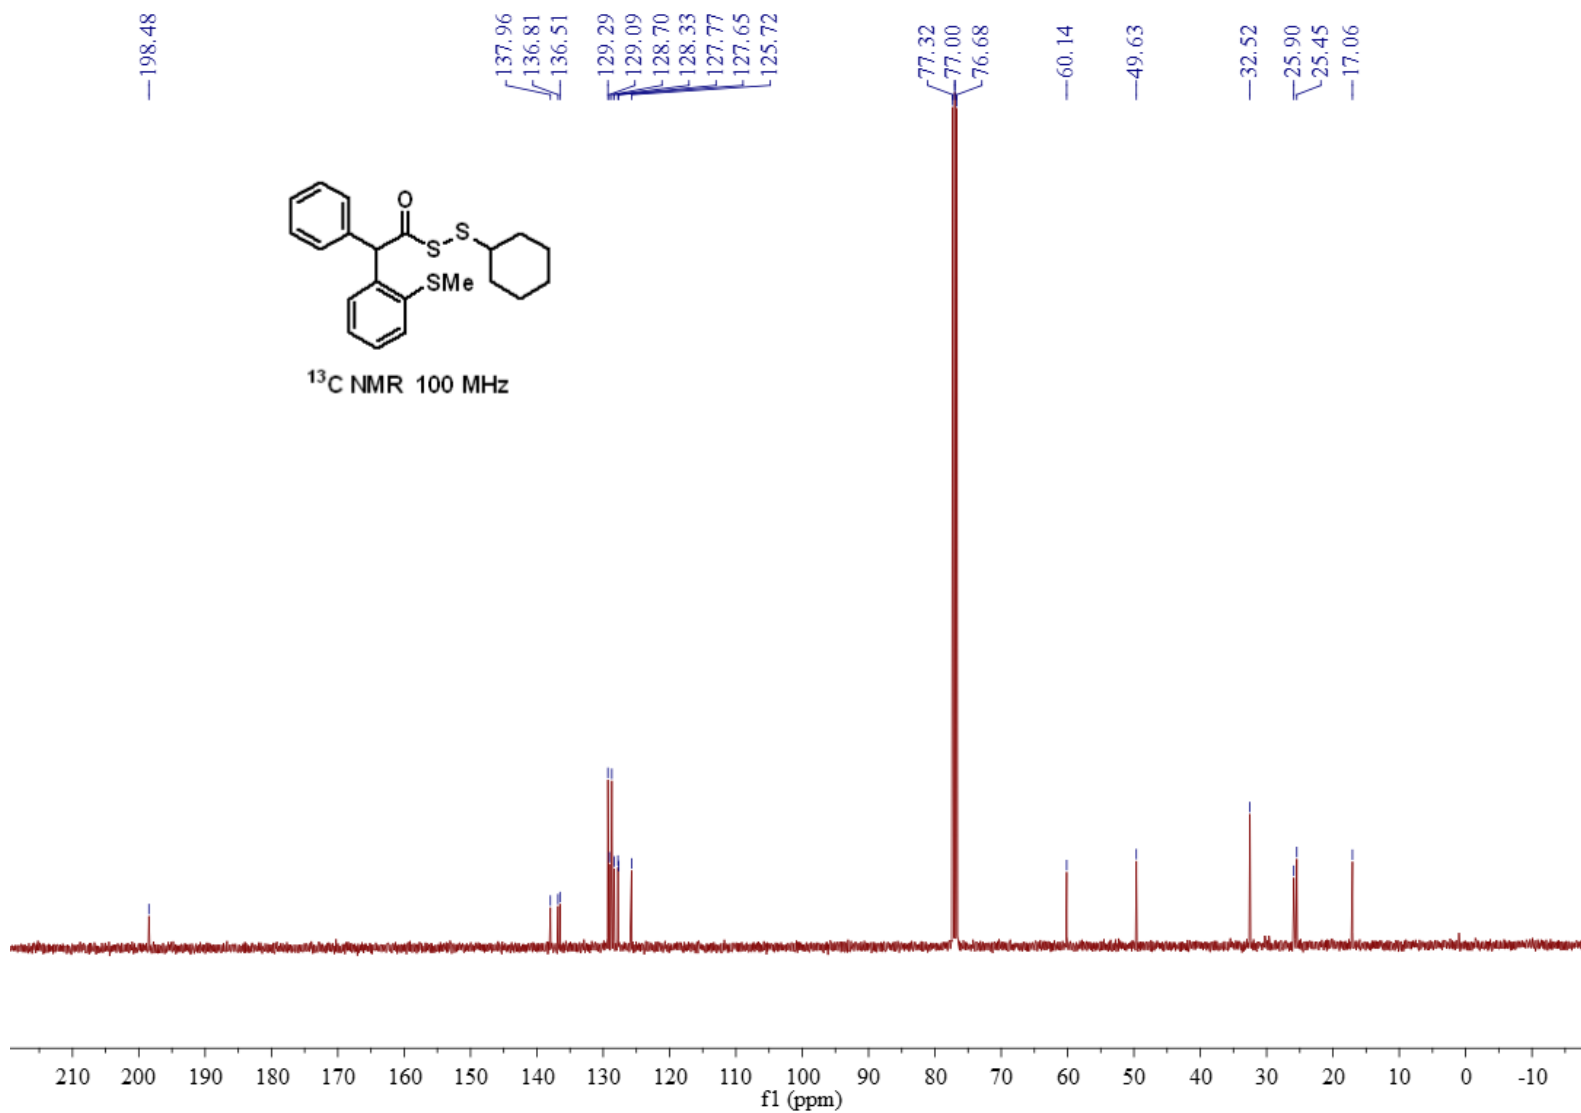



4p

7.76  
7.74  
7.52  
7.51  
7.50  
7.49  
7.49  
7.47  
7.47  
7.35  
7.35  
7.34  
7.33  
7.33  
7.32  
7.31  
7.26

4.88  
4.86  
4.86  
4.84

2.69  
2.67  
2.65

1.90  
1.72

1.20  
0.88  
0.87  
0.85

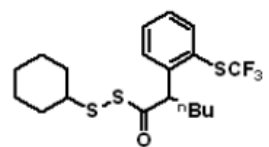

<sup>1</sup>H NMR 400 MHz CDCl<sub>3</sub>

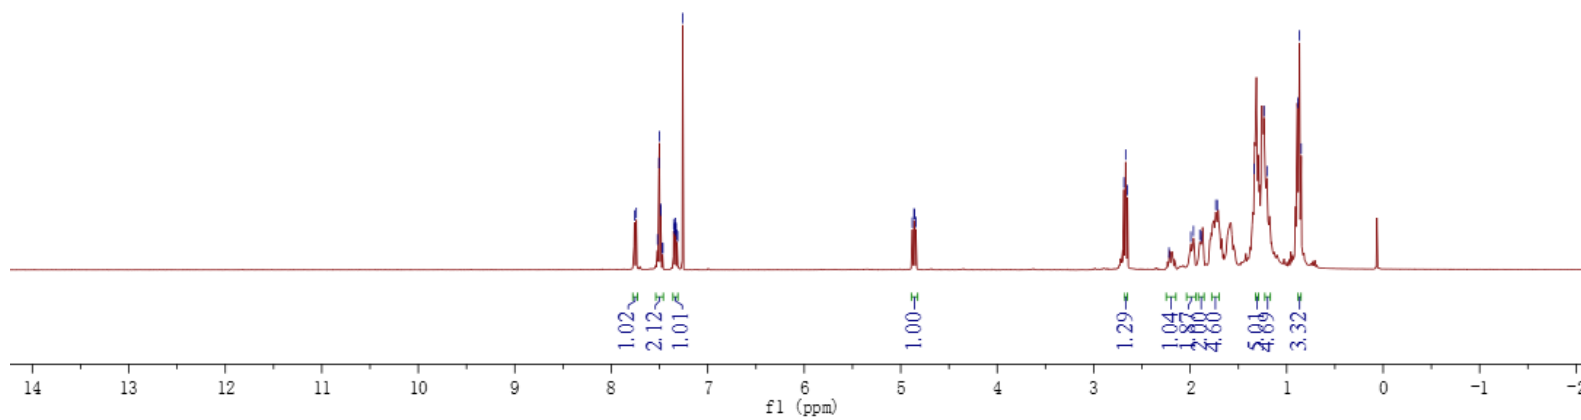

Copies of NMR spectra

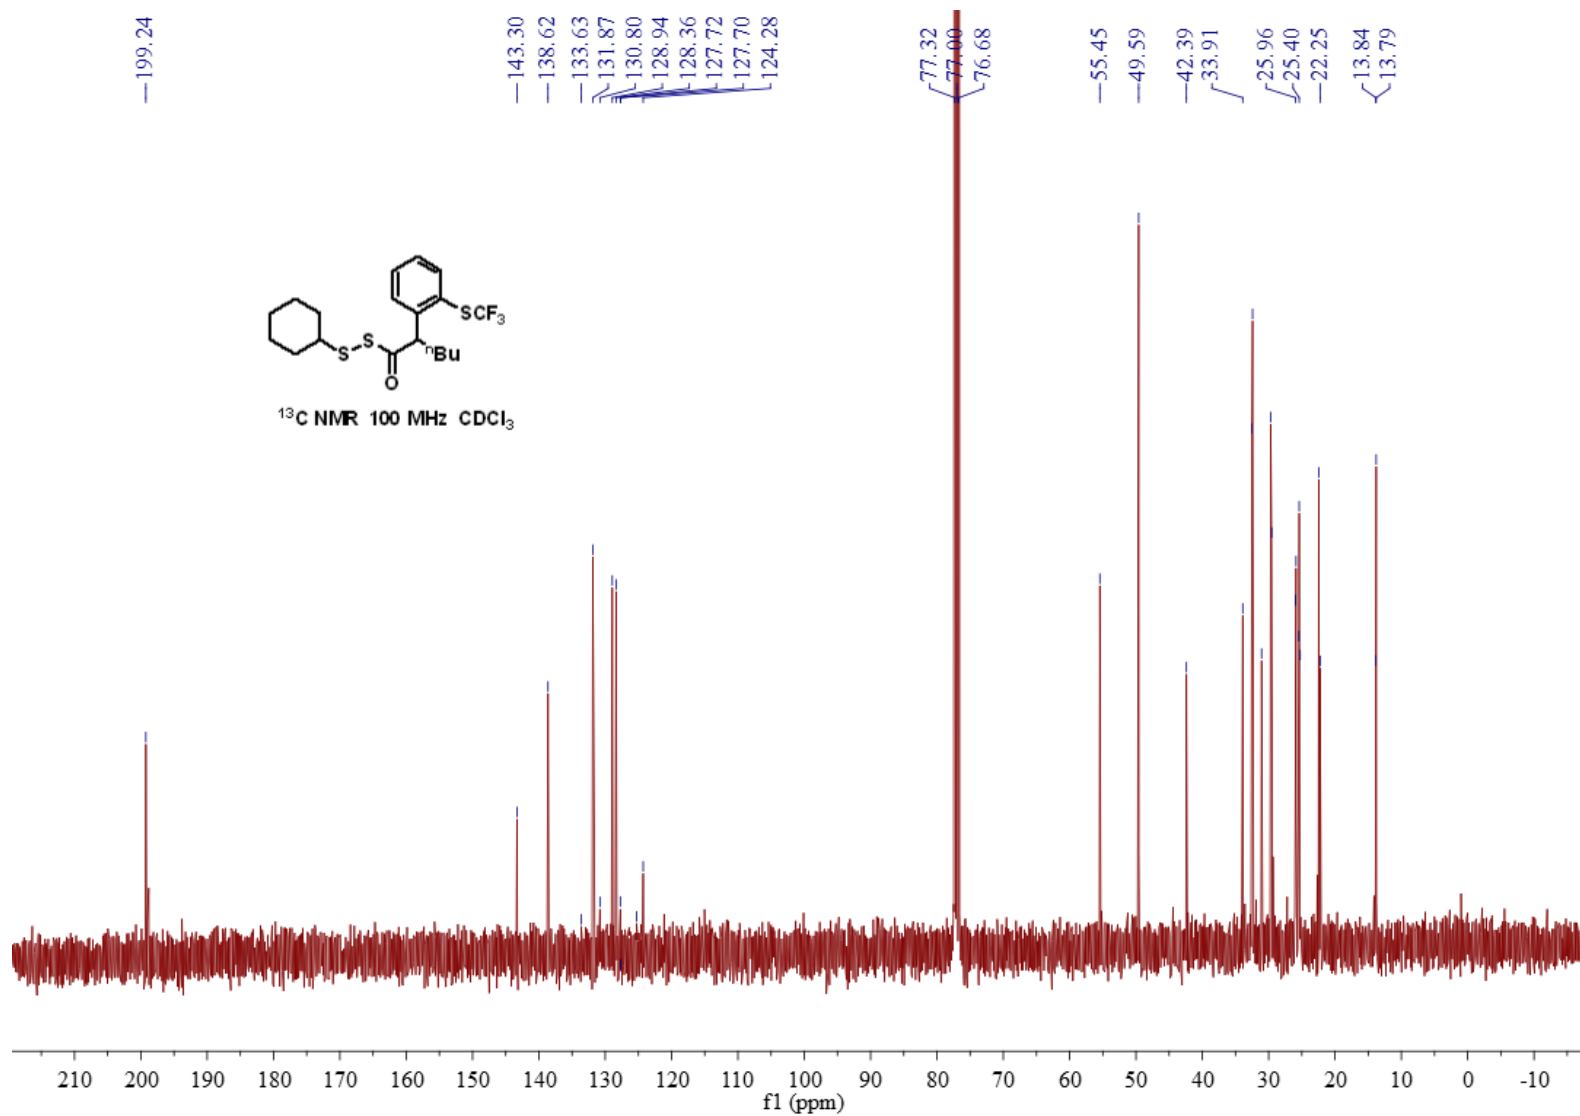

Copies of NMR spectra

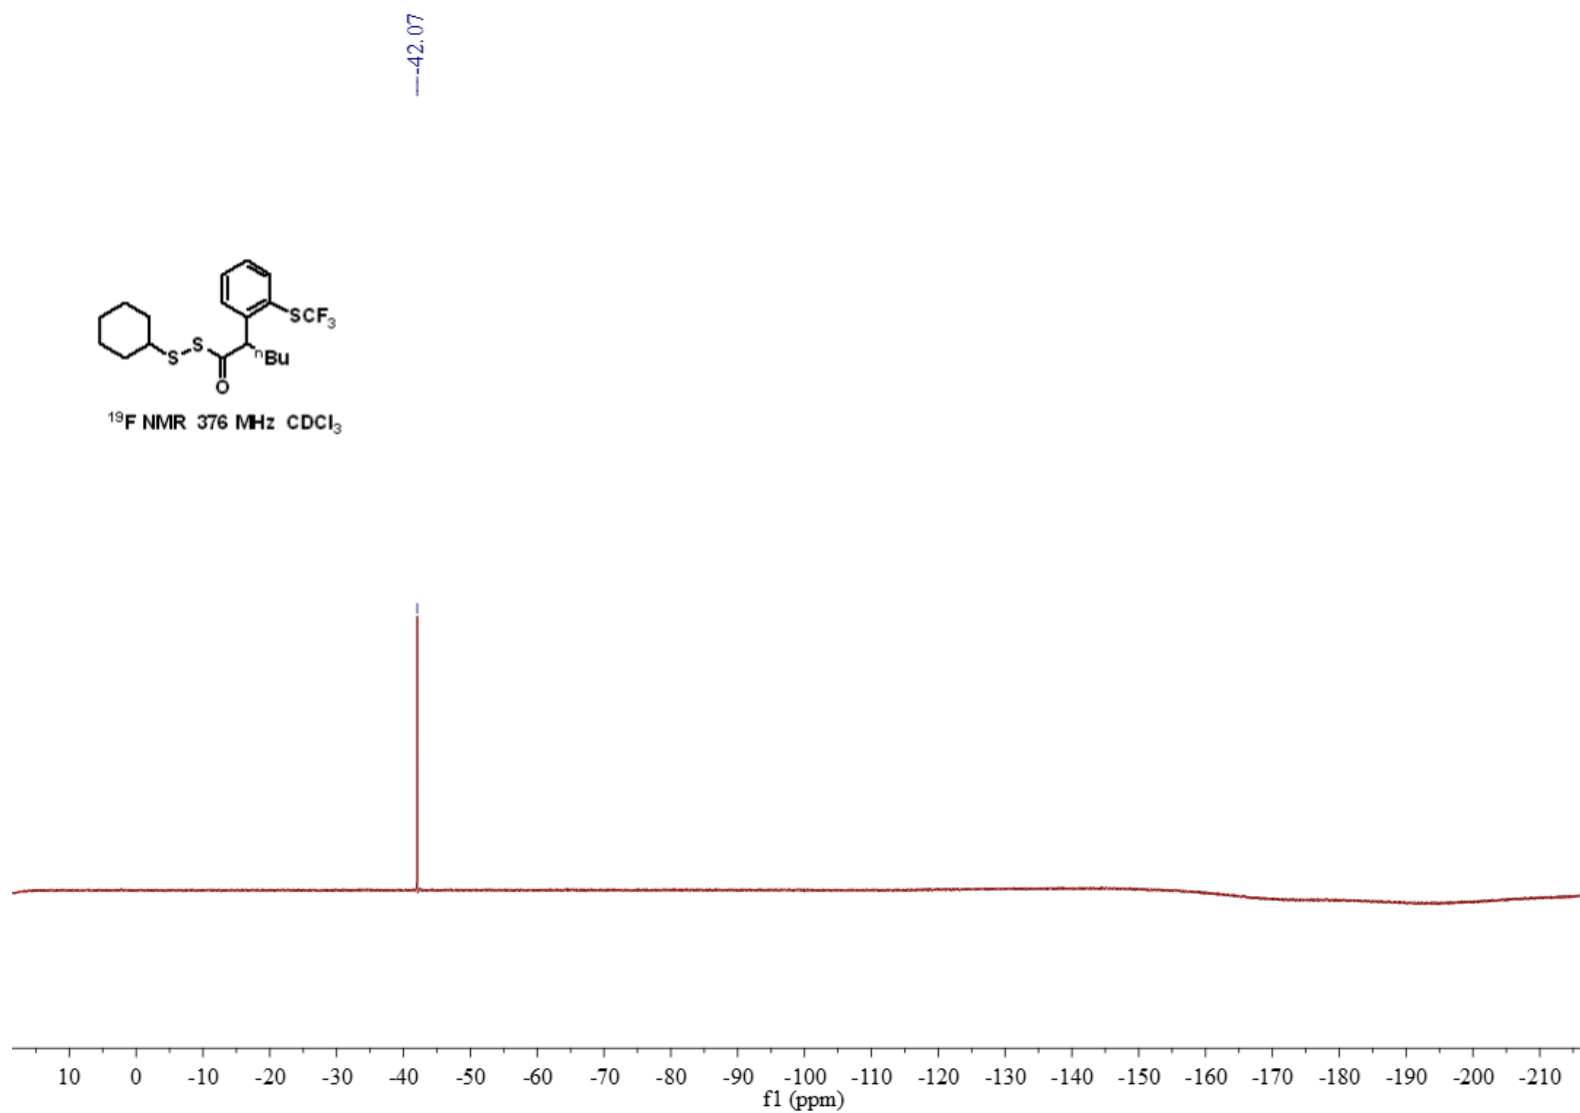

6

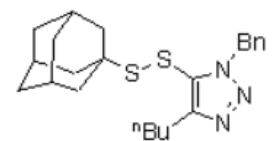

<sup>1</sup>H NMR 400 MHz CDCl<sub>3</sub>

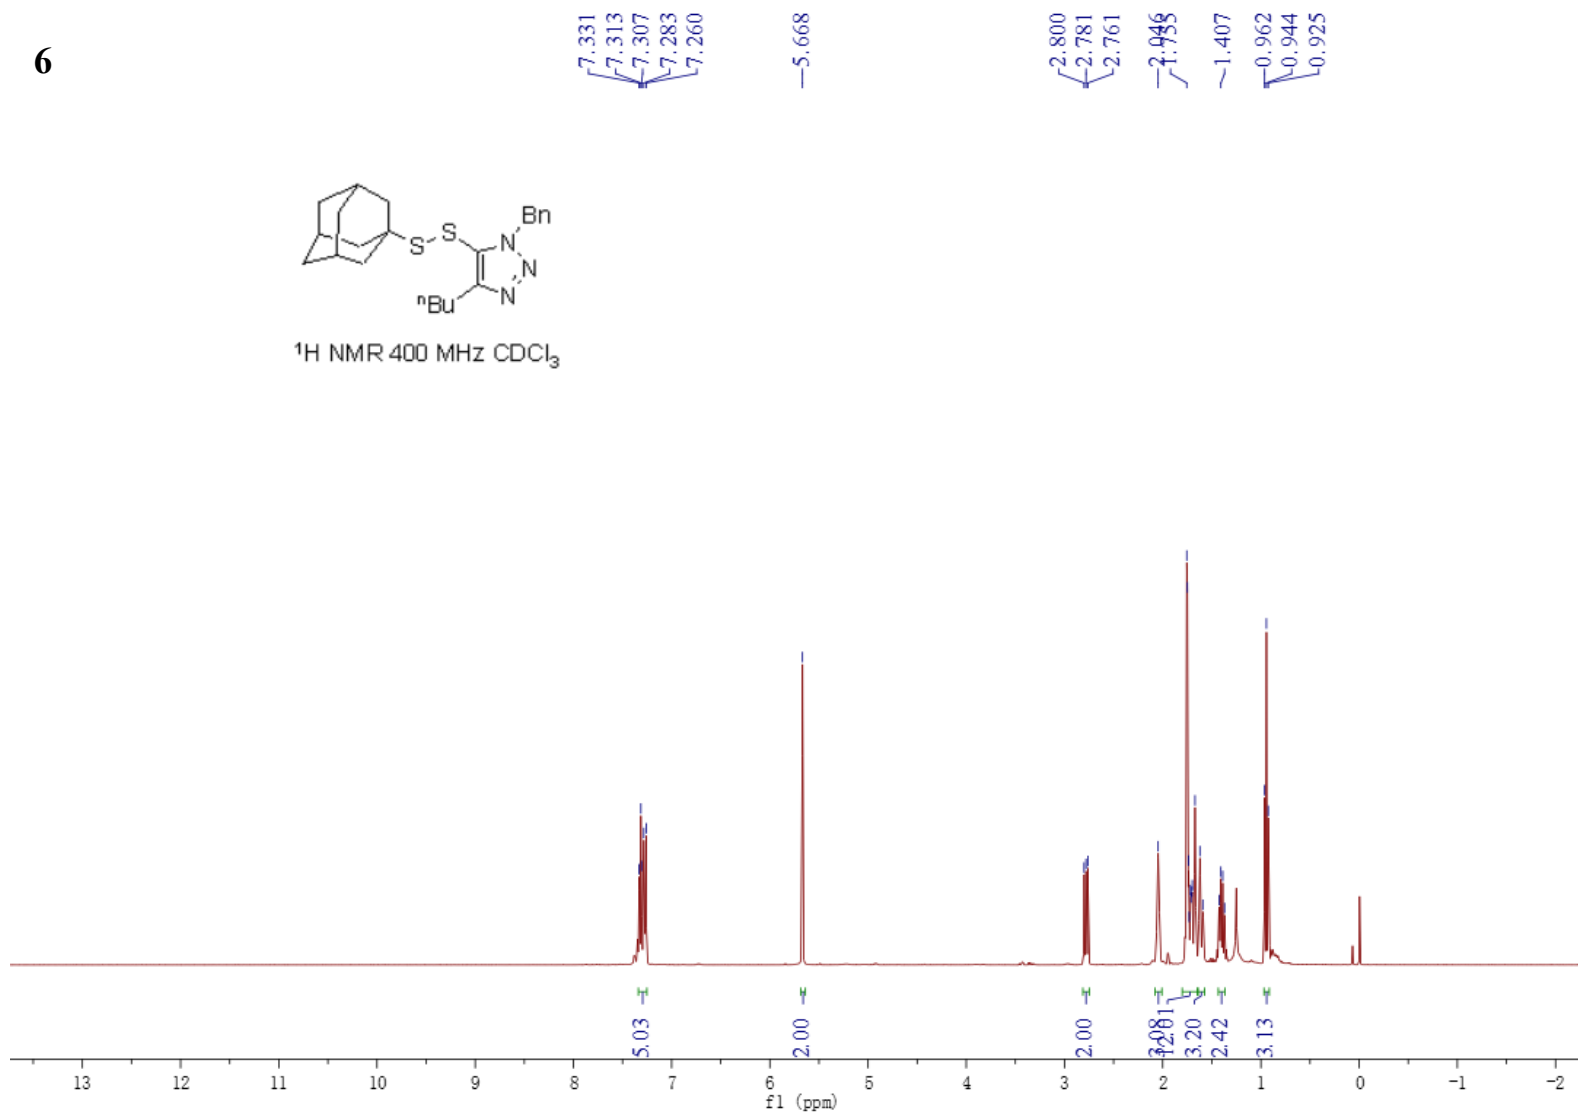

Copies of NMR spectra

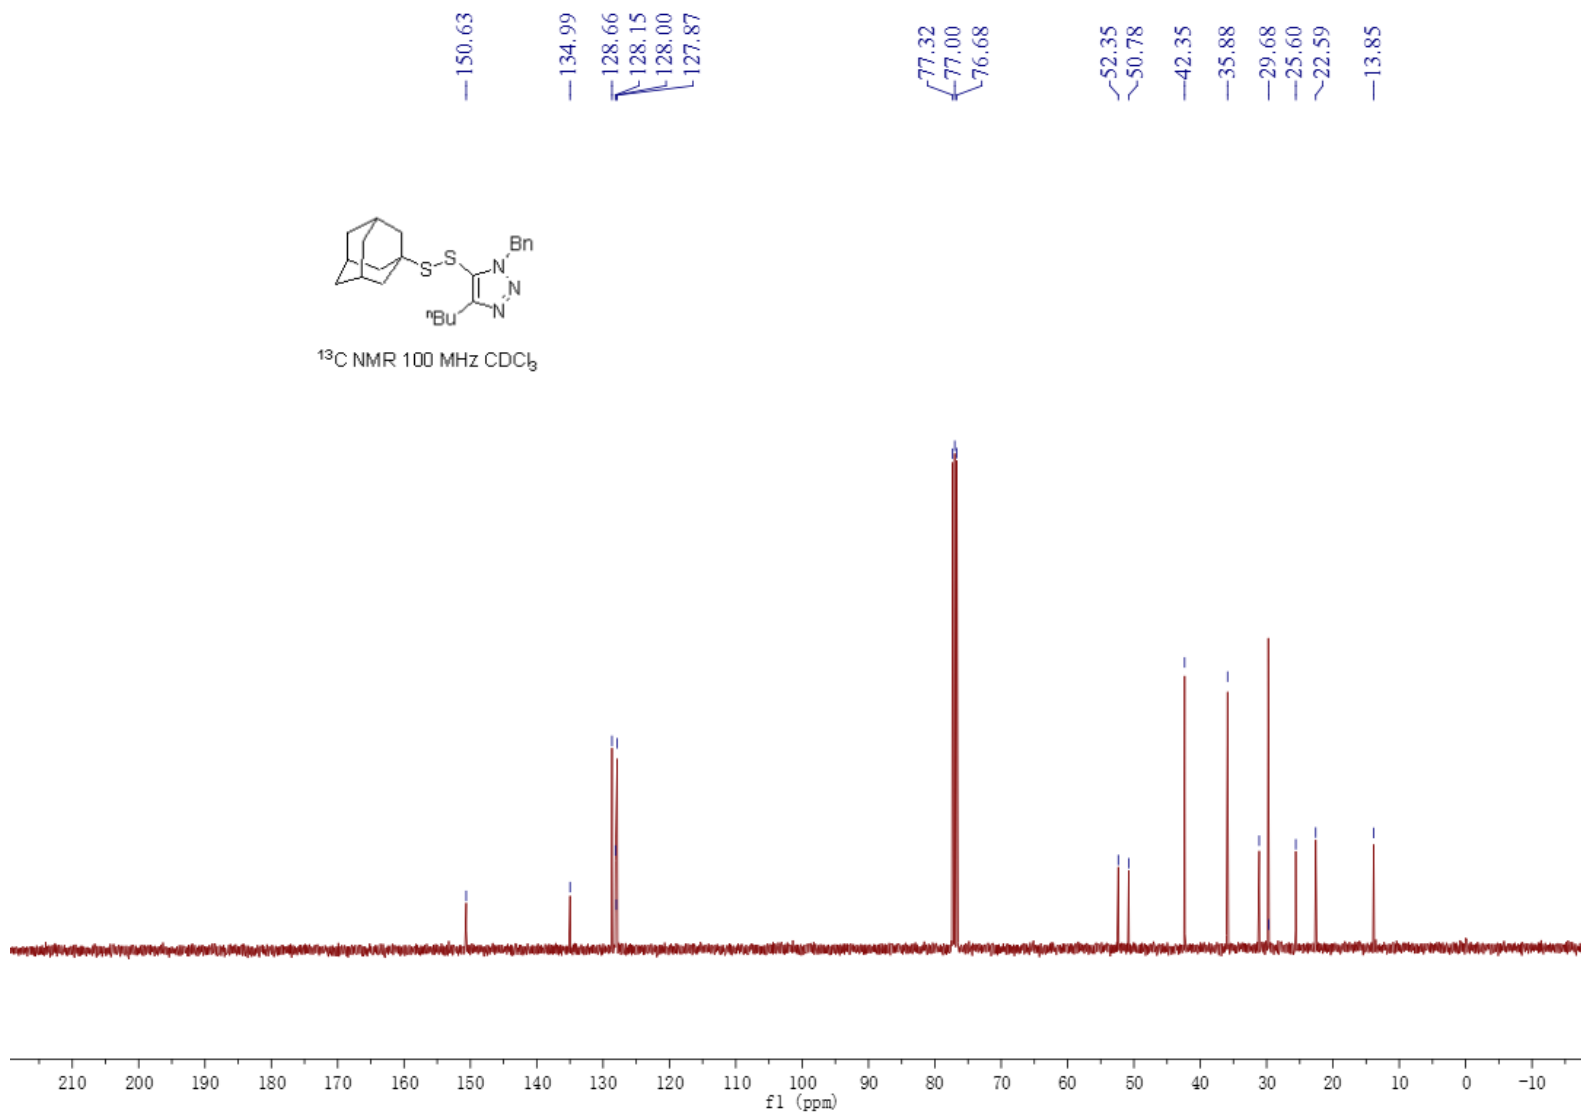

7

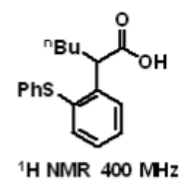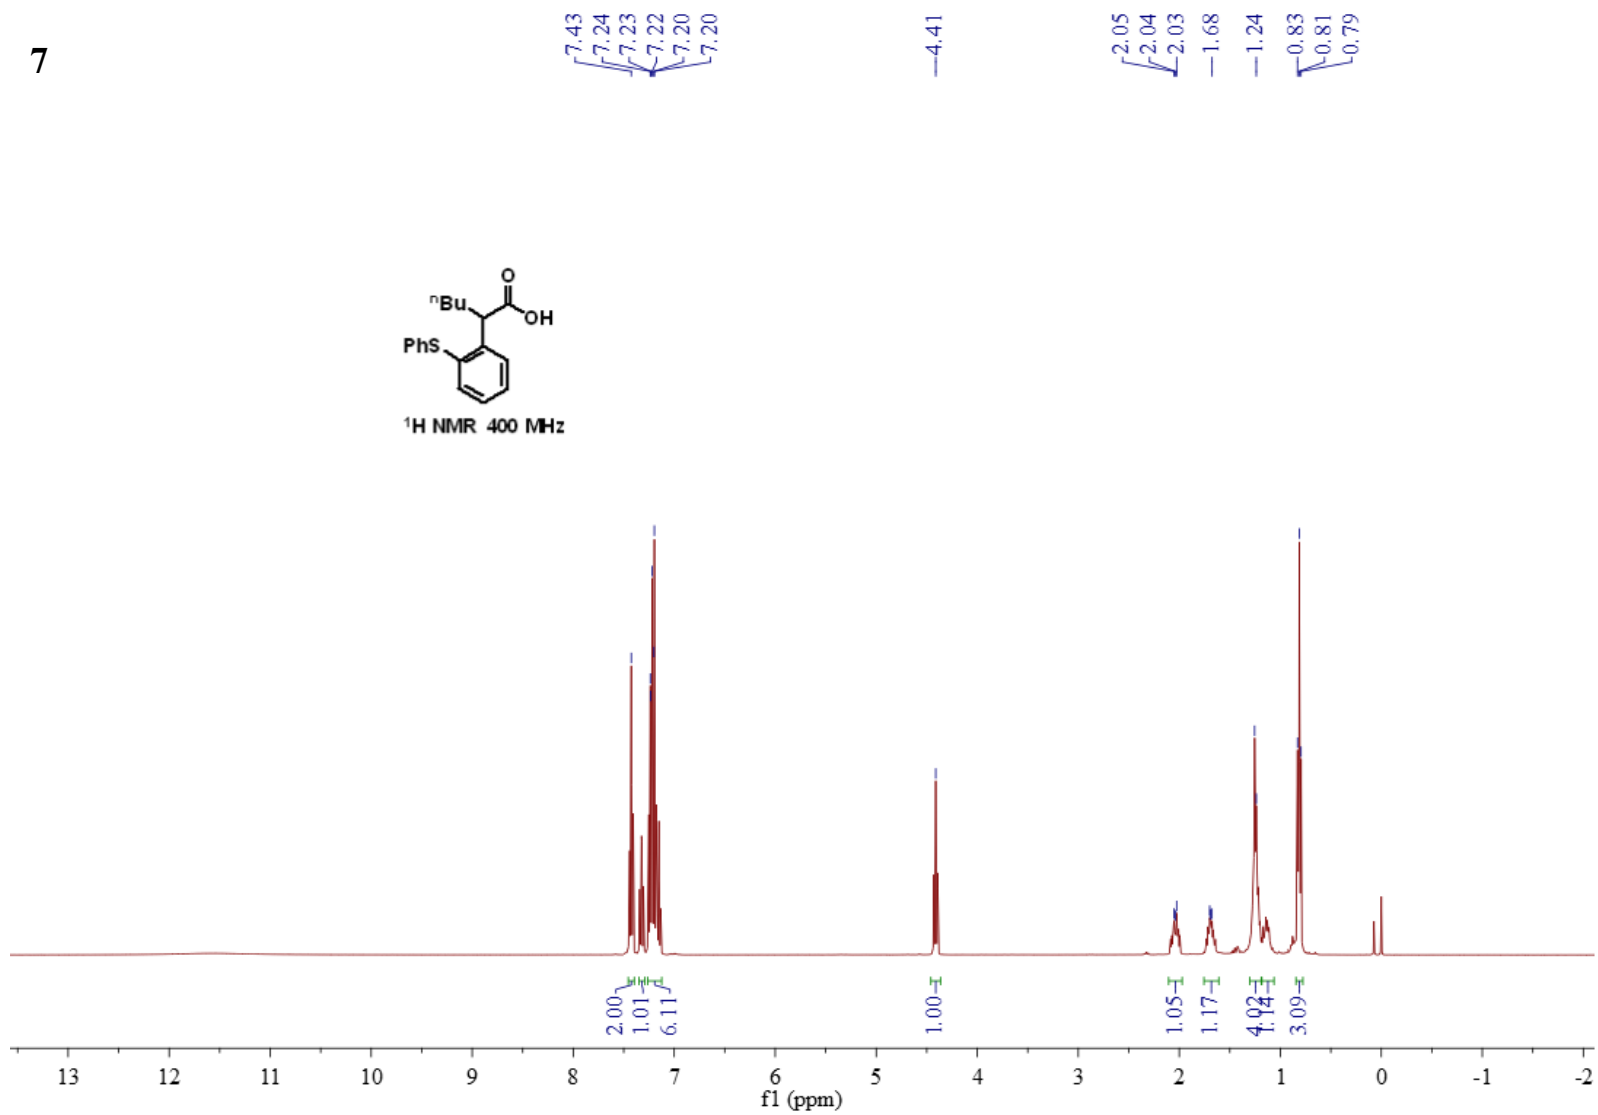

Copies of NMR spectra

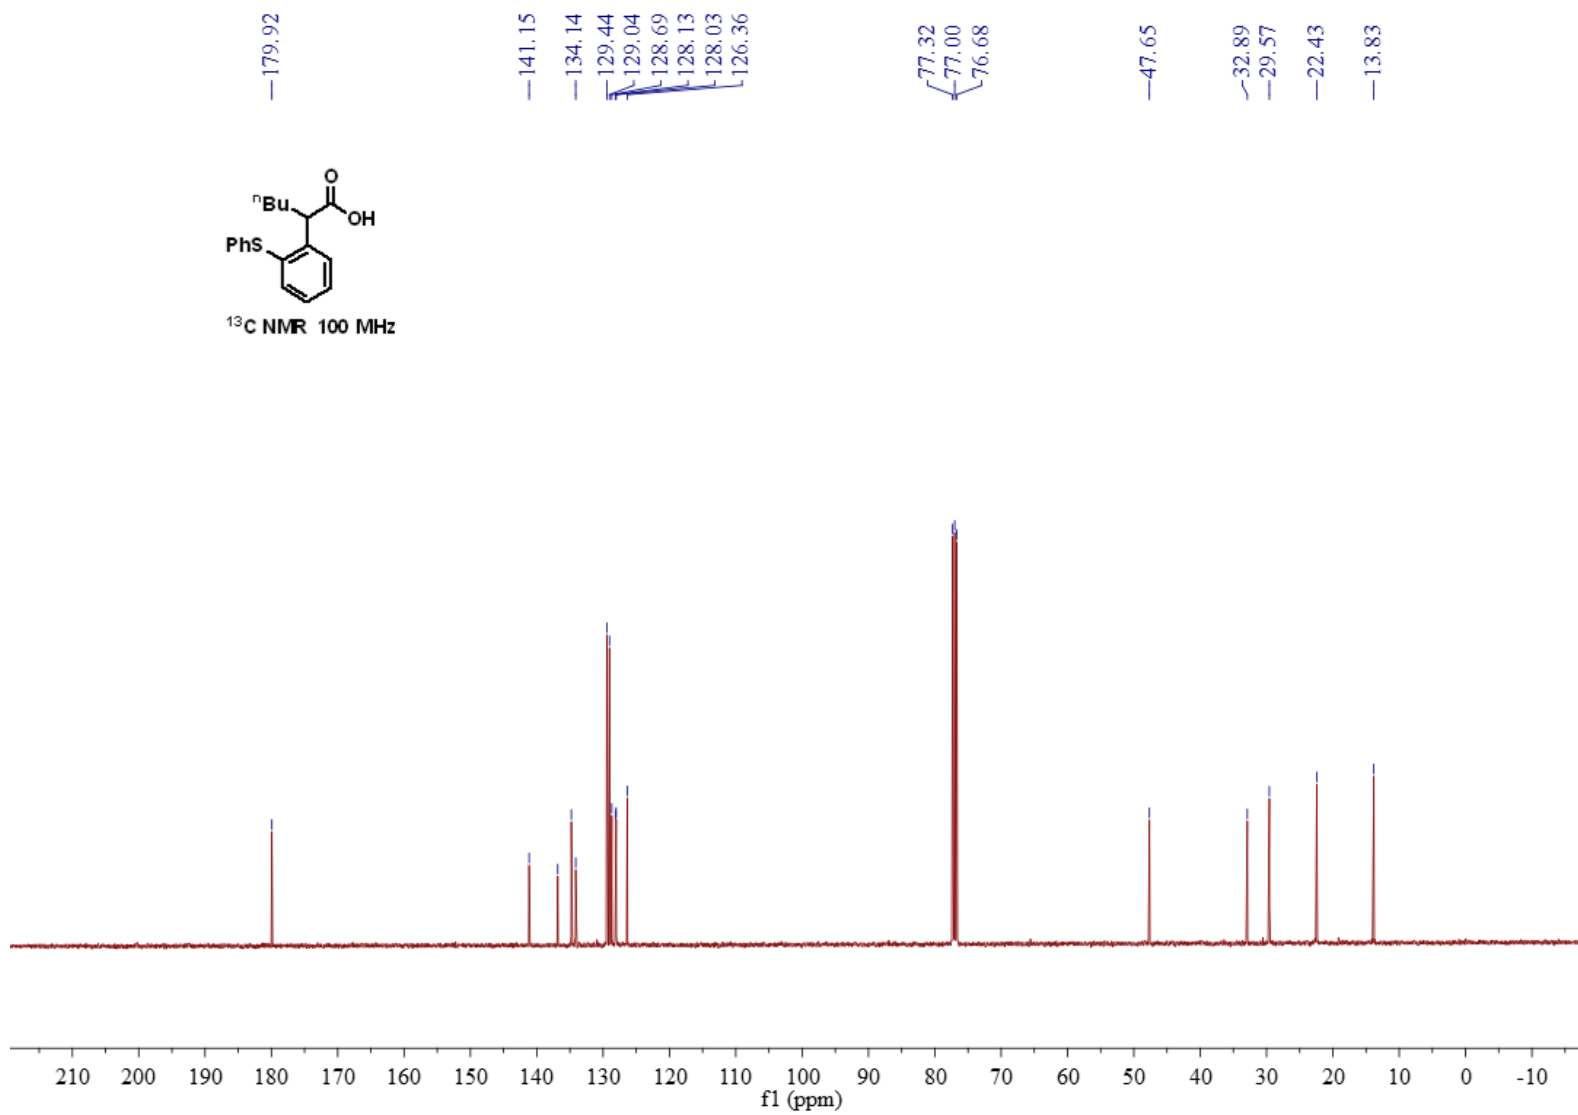

8

7.50  
7.50  
7.48  
7.48  
7.40  
7.40  
7.38  
7.38  
7.29  
7.27  
7.20  
7.19  
7.18  
7.18  
7.16  
7.16  
7.12  
7.11  
7.10  
-5.34  
-5.19  
-4.07  
2.04  
2.03  
2.01  
-1.58  
-1.18  
-0.76  
-0.74  
-0.73

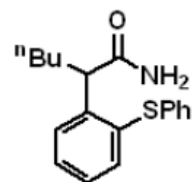

<sup>1</sup>H NMR 400 MHz

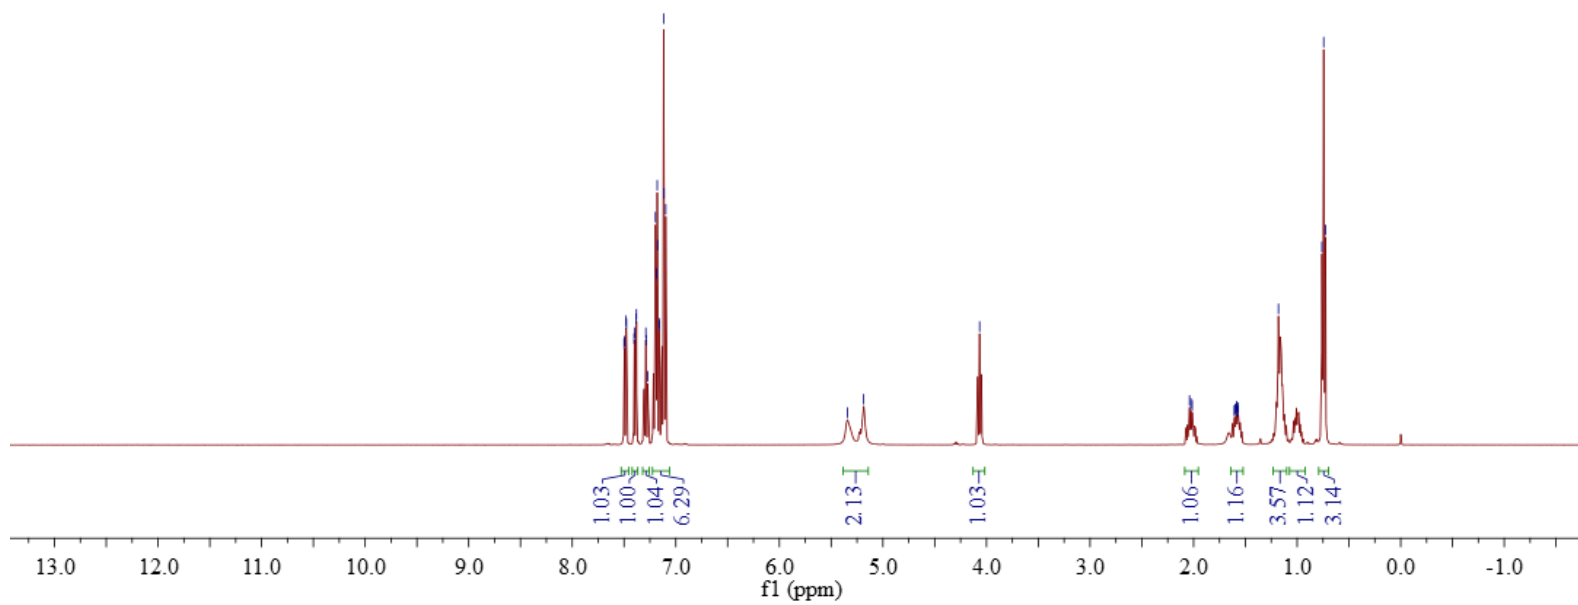



Copies of NMR spectra

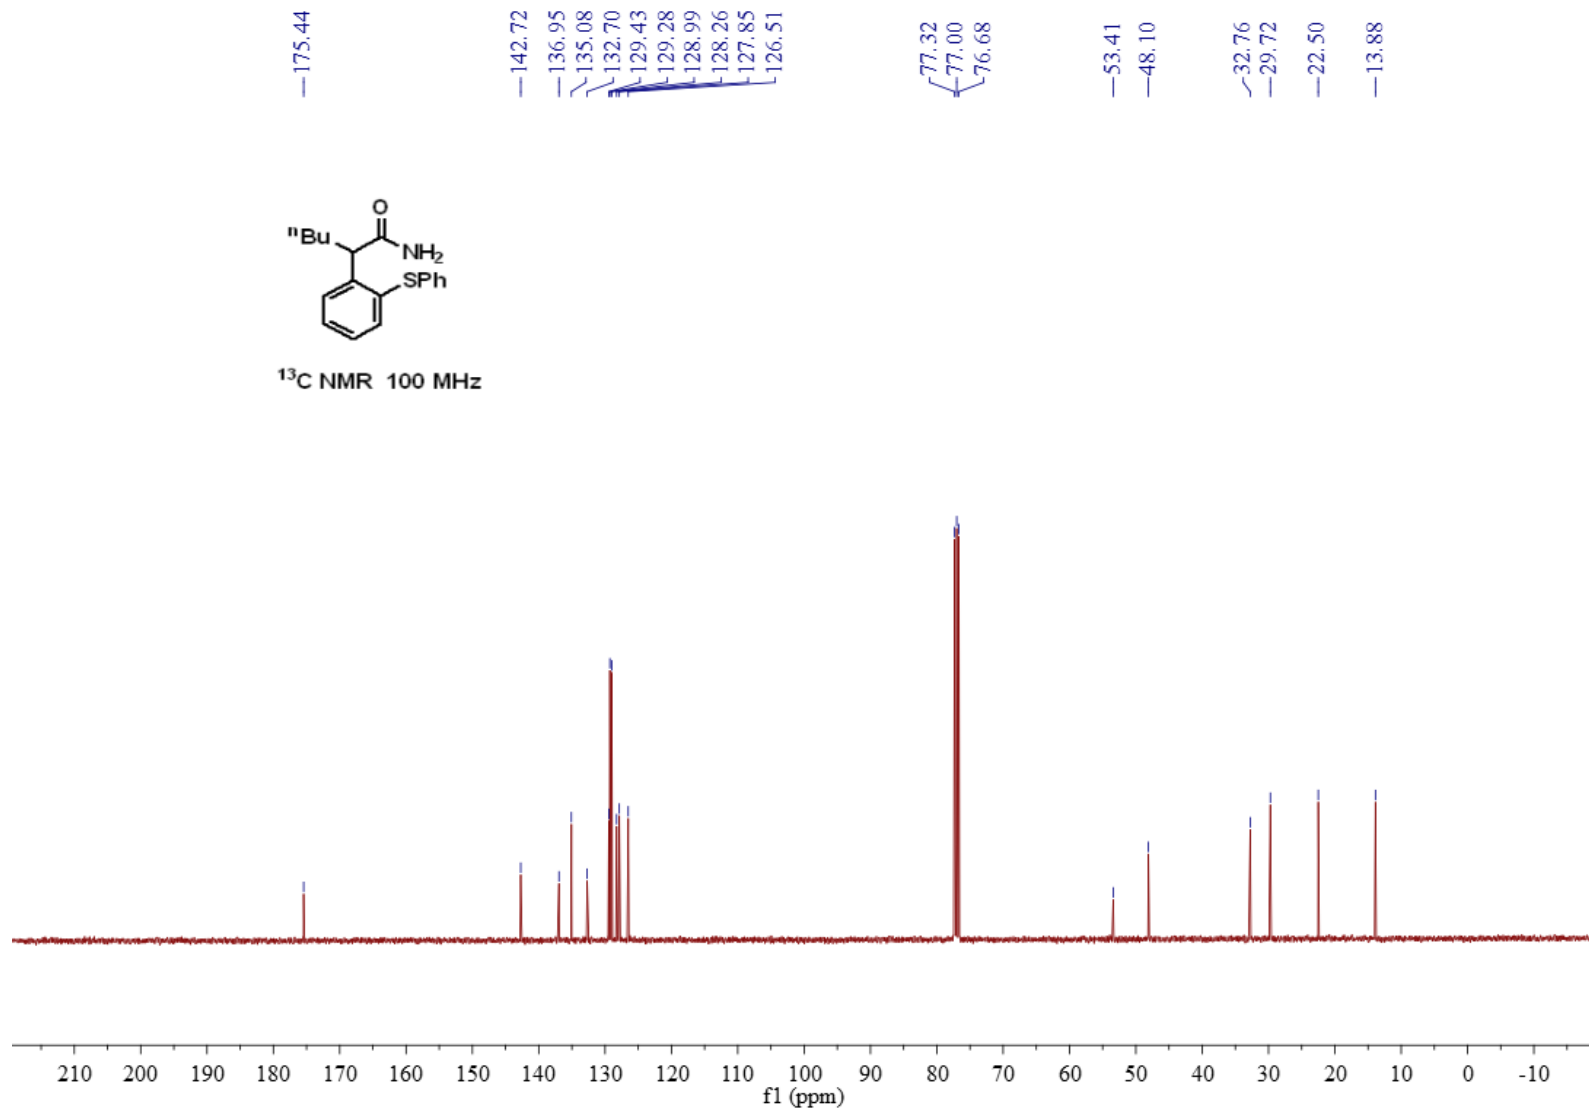

Supplement: d3qo00159h1.pdf [file d3qo00159h1.pdf]
